# Supplementary material for: Antibiotic-induced accumulation of lipid II synergizes with antimicrobial fatty acids to eradicate bacterial populations
Source: eLife. 2023 Mar 6;12:e80246. doi: 10.7554/eLife.80246 (PMC10030119; doi:10.7554/eLife.80246)
Supplement: Figure 1—figure supplement 2—source data 1. [file elife-80246-fig1-figsupp2-data1.xlsx]

## Sheet: Fig. 1-fig. sup. 1a
Figure 1-figure supplement 1A
		Time (h)	PA (5ug/ml)			PA (11ug/ml)			PA (15ug/ml)			PA (30ug/ml)			VAN20
		0	8.32	8.3	8.28	8.26	8.3	8.32	8.11	8.38	8.51	8.36	8.32	8.36	8.3	8.45	8.3
		0.5	8.41	8.36	8.46	8.2	8.46	8.48	7.53	7.72	7.96	6.98	7.52	7.91	8.23	8.26	8.38
		2	8.57	8.6	8.63	8.58	8.64	8.57	6.04	6.82	7.08	5.48	6.4	6.43	8.34	8.26	8.15
		6	8.74	8.79	8.78	8.45	8.7	8.7	7.11	8	8.18	5.83	6.72	6.56	6.11	6.72	6.7

## Sheet: Fig. 1-fig. sup. 1b
Figure 1-figure supplement 1B
	Time (h)	PA(5) + VAN(20)			PA(11) + VAN(20)			PA(15) + VAN(20)			PA(30) + VAN(20)			VAN20
	0	8.3	8.32	8.61	8.23	8.46	8.41	8.15	8.46	8.45	8.3	8.43	8.32	8.3	8.45	8.3
	0.5	7.45	8.46	8.59	5.97	6	5.76	4.7	4.83	5.08	4.81	4.93	5.01	8.23	8.26	8.38
	2	6.46	8	8.26	4.95	4.71	4.51	3.76	3.57	3.56	3.3	3.34	3.3	8.34	8.26	8.15
	6	4.69	6.11	7.2	3	3.23	2.95	3	2	2	2	3.64	2.3	6.11	6.72	6.7

## Sheet: Fig. 1-fig. sup. 1c
Figure 1-figure supplement 1C
	Time (h)	LA (5ug/ml)			LA (11ug/ml)			LA (15ug/ml)			LA (30ug/ml)			VAN20
	0	8.04139	8	8.17609	8.04	8.2	7.64	8	8.14613	8.11394	8.07918	8.07918	8.27875	8	8	8.20412
	0.5	8.27875	8.39794	8.43136	8.26	8.3	7.79	7.49136	7.07918	7.34242	7.66276	7.11394	7.8451	7.68124	7.66276	7.88081
	2	8.44716	8.41497	8.57978	8.56	8.51	8.64	7.72428	7.36173	7.70757	7.90309	7.27875	7.89763	6.80618	6.78533	7.07918
	6	8.53148	8.39794	8.5563	8.57	8.61	8.67	8.716	8.57978	8.61278	8.62325	8.61278	8.75587	5.6902	6.07918	6.27875

## Sheet: Fig. 1-fig. sup. 1d
Figure 1-figure supplement 1D
		Time (h)	LA (5ug/ml) + VAN20			LA (11ug/ml) + VAN20			LA (15ug/ml) + VAN20			LA (30ug/ml) + VAN20			VAN20
		0	8.17609	8	8.25527	8.11394	8.11394	8.27875	8.07918	8.07918	8.23045	7.88649	8	8.32222	8	8	8.20412
		0.5	7.53148	7.44716	7.54407	5.54407	5.50515	5.75587	5.25527	5.32222	5.716	5.14613	5.32222	5.34242	7.68124	7.66276	7.88081
		2	6.41497	6.50515	6.75587	4.50515	4.30103	5.07918	4.25527	4.17609	4.34242	3.49136	4.63347	4	6.80618	6.78533	7.07918
		6	5.97772	5.86923	6.30103	3.30103	3.25527	3.25527	2.60206	2.69897	2.69897	2	2.8451	2	5.6902	6.07918	6.27875
