# Supplementary material for: Antibiotic-induced accumulation of lipid II synergizes with antimicrobial fatty acids to eradicate bacterial populations
Source: eLife. 2023 Mar 6;12:e80246. doi: 10.7554/eLife.80246 (PMC10030119; doi:10.7554/eLife.80246)
Supplement: Figure 1—figure supplement 3—source data 1. [file elife-80246-fig1-figsupp3-data1.xlsx]

## Sheet: Fig. 1 Sup. 3A
	AsKO	AsKO + PA	AsKO + VAN	AsKO + VAN + PA
	7.531	7.908	7.176	5.041
	7.556	7.778	7.041	5.301
	7.556	7.806	7.079	6.255
	7.633	7.681	7.322	5.362
	7.623	7.672	7.38	5.462
	7.663	7.716	7.447	5.362

## Sheet: Fig. 1 Sup. 3B
	CCCP	CCCP + PA	CCCP + VAN	CCCP + VAN + PA
	8.431	7.748	7.447	4.869
	8.462	7.869	7.491	4.74
	8.447	8.342	7.462	4.826
	8.643	6.919	7.732	5.633
	8.699	7.851	7.833	4.959
	8.653	7.531	7.886	4.74
