# Supplementary material for: Antibiotic-induced accumulation of lipid II synergizes with antimicrobial fatty acids to eradicate bacterial populations
Source: eLife. 2023 Mar 6;12:e80246. doi: 10.7554/eLife.80246 (PMC10030119; doi:10.7554/eLife.80246)
Supplement: Figure 1—source data 1. [file elife-80246-fig1-data1.xlsx]

## Sheet: Fig. 1a
Figure 1A
		No drug						+VAN
	Ctrl	9.20412	8.79934	8.81291	8.91381	8.72428	8.85126	6.53148	6.20412	6.53148	6	6.91381	6.34242
	RL	8.69	8.59	8.6	8.47712	8.5682	8.62325	5.54407	5.5563	5.07918	4.94	4.56
	PA	8.27875	8.49136	8.23045	8.54	8.4	8.26	2.60206	2.90309	2.69897	2.6	2.78	2.78
	LA	8.5682	8.61278	8.6721	8.43136	8.47712	8.5563	2.30103	2	2.95424	4.38021	4.07918	2.8451
	GML	8.20412	8.25527	8.32222	8.4624	8.20412	8.36173	7.32222	7.07918	7.39794	6.41497	6.34242	6.50515
	Lauric acid	8.14613	8.41497	8.30103	8.07918	8.04139	8.27875	7.25527	6.98227	6.74819	5.44716	5.95424	5.78533
	Ad	8.04139	8	8.23045	7.54407	7.61278	7.69897	7.74036	8.07918	8.17609	6.62325	6.27875	6.27875
	BA	8.47712	8.54407	8.62325	8.78	8.82	8.83	6.60206	6.53148	6.78533	7.41	7.36	7.43

## Sheet: Fig. 1b
Figure 1B
	Time (h)	Control						PA						Vanc (20ug/ml)						VAN + PA
	0	8.3	8.36	8.26	8.36	8.4	8.3	8.3	8.4	8.23	8.28	8	7.9	8.45	8.34	8.48	8.3	8.36	8.36	8.54	8.28	8.43	8.23	8.36	8.34
	0.5	8.58	8.51	8.49	8.58	8.53	8.62	8.36	8.23	8.54	8.26	8.43	7.85	8.28	8.3	8.23	8.36	8.3	8.28	5.67	5.36	5.94	5.11	5.26	5.46
	2	8.77	8.67	8.72	8.54	8.72	8.72	8.66	8.41	8.6	8.18	8.3	8.56	7.86	7.83	7.81	7.86	7.93	8.08	4.3	4.62	4.79	4.45	4.46	4.46
	6	8.8	8.85	8.87	9.2	8.8	8.81	8.63	8.56	8.76	8.54	8.4	8.26	6.67	6.46	6.65	6.7	7.15	7.15	2.6	2.78	2.78	2	2.3	2.48

## Sheet: Fig. 1c
Figure 1C
	Time (h)	Untreated						PA11						VAN20						PA + VAN
	0	8.3	8.41	8.56	8.08	8.08	8.28	8.48	8.6	8.62	8	8.28	8.4	8.57	8.58	8.56	8.11	8.2	8.2	8.49	8.54	8.32	8.18	8.3	8.3
	0.5	8.61	8.66	8.74	8.52	8.51	8.4	8.41	8.53	8.36	7.56	8.34	7.77	8.62	8.69	8.56	8	8.36	8.18	5.99	5.98	6.18	5.54	5.95	5.91
	2	8.71	8.72	8.81	8.54	8.75	8.71	8.76	8.76	8.82	7.64	8.74	8.46	7.77	8.18	8.11	7.3	7.51	7.52	4.6	4.86	5.08	4.08	5.23	4.89
	6	8.95	8.9	9	8.65	8.96	8.79	8.76	9.04	9.18	8.88	8.79	8.95	7.85	7.89	8.11	6.34	6.66	6.88	4.26	4.46	3.85	3	4.04	3.52
	22	9.57	9.6	9.85	9.61	9.6	9.58	9.68	9.75	9.73	9.65	9.62	9.65	7.46	7.67	7.45		9.05	8.15	2.48	2	2	2	2.78	2.3
