# Supplementary material for: Antibiotic-induced accumulation of lipid II synergizes with antimicrobial fatty acids to eradicate bacterial populations
Source: eLife. 2023 Mar 6;12:e80246. doi: 10.7554/eLife.80246 (PMC10030119; doi:10.7554/eLife.80246)
Supplement: Figure 2—source data 1. [file elife-80246-fig2-data1.xlsx]

## Sheet: Fig. 2b
Figure 2B
Time (h)	Fosfomycin (250ug/ml)						Fos + PA
0	7.71	7.81	7.85	8.2	8.4	8.46	7.81	8.15	8.15	8.28		8.32
0.5	7.32	7.36	7.53	8.23	8.38	8	7.38	7.6	7.6	8.45		8.2
2	6	6.38	6.66	7.11	7.66	7.08	5.69	5.86	6.15	8.04		7.2
6	4.56	5.15	5.43	5.58	6.08	5.64	3.59	3.73	4.11	6.11		5.15

## Sheet: Fig. 2c
Figure 2C
		Time (h)	OX (5ug/ml)						OX + PA
		0	8.15	8.15	8.23	8.38	8.59	8.28	8.2	8.43	8.46	8.3	8.52	8.51
		0.5	8.26	8.3	8.36	8.43	8.4	8.28	7.73	8.46	8.3	8.26	8.43	8.15
		2	7.65	7.86	7.88	8.2	8.36	7.88	7.49	8.23	8.04	7.67	8.36	7.81
		6	6.88	6.08	6.85	7.38	7.57	6.73	5.38	7.67	6.96	6.18	7.4	5.92

## Sheet: Fig. 2d
Figure 2D
	Time (h)	NAF (2.5ug/ml)						NAF + PA
	0	8.23	8.38	8.52	8.46	8.15	8.2	8.15	8.36	8.34	8.28	8.23	8.41
	0.5	8.18	8.4	8.34	8.28	8.3	8.23	8.3	8.48	8.26	8.23	8.18	8.32
	2	7.38	7.81	7.89	7.86	7.59	7.74	7.95	8.11	7.67	7.75	7.23	7.86
	6	6.43	6.76	6.8	6.28	5.64	6.26	6.69	7.43	5.86	5.97	5.34	6.08

## Sheet: Fig. 2e
Figure 2E
		Time (h)	Bacitracin (250ug/ml)						Bacitracin + PA
		0	8.34	8.11	8.41	8.3	8.36	8.52	8.49	8.32	8.4	8.23	8.23	8.41
		0.5	8.23	8.23	8.34	8.48	8.32	8.49	5.67	5.66	5.68	5.7	5.92	5.9
		2	8.11	7.72	7.9	7.83	7.83	8.15	4.81	4.72	4.84	4.95	5.2	4.9
		6	7.83	6.74	7.71	7.66	7.6	8.18	2.9	2	2.85	3.28	3.43	3.54

## Sheet: Fig. 2f
Figure 2F
		Time (h)	Tarocin A1 (8)						Tarocin A1 + PA
		0	8.14613	8.36173	8.34242	8.11394	8.07918	7.63347	8.07918	7.87506	7.97313	8.07918	8.32222	8.23045
		0.5	8.14613	8.43136	8.34242	8.17609	8.20412	7.80618	7.80618	7.87506	7.9345	7.94939	8.20412	8
		2	8.36173	8.34242	8.17609	8.11394	8.17609	8.27875	7.80618	7.64345	7.81291	8.11394	8.20412	8.11394
		6	8.39794	8.41497	8.27875	7.91381	7.73239	7.6902	7.53148	6.64345	7.20412	7.41497	7.38021	7.32222
