# Supplementary material for: Antibiotic-induced accumulation of lipid II synergizes with antimicrobial fatty acids to eradicate bacterial populations
Source: eLife. 2023 Mar 6;12:e80246. doi: 10.7554/eLife.80246 (PMC10030119; doi:10.7554/eLife.80246)
Supplement: Figure 3—source data 1. [file elife-80246-fig3-data1.xlsx]

## Sheet: Figure 3A
						Fig. 3B
	Retention time [min]	Control	PA	VAN	PA+VAN	Bactoprenol (C55OH)	Lipid I/II
	0.00447917	4.85335	4.93701	4.84508	4.91985	0.34618	4.33918
	0.0111458	4.81275	4.89492	4.81206	4.8806	0.348068	4.30286
	0.0178125	4.78149	4.86398	4.77904	4.84895	0.350011	4.27157
	0.0244792	4.74763	4.82994	4.74602	4.81521	0.351959	4.23898
	0.0311458	4.71435	4.79671	4.71282	4.78202	0.365071	4.20682
	0.0378125	4.68094	4.76324	4.67962	4.74868	0.378264	4.17456
	0.0444792	4.64752	4.72977	4.64636	4.71535	0.380235	4.14227
	0.0511458	4.61408	4.69627	4.61316	4.68203	0.382202	4.11008
	0.0578125	4.58071	4.66273	4.57984	4.6488	0.383894	4.07785
	0.0644792	4.54741	4.62932	4.54658	4.61559	0.41665	4.04572
	0.0711458	4.51427	4.59588	4.51338	4.58244	0.449288	4.01353
	0.0778125	4.48114	4.56252	4.48018	4.54934	0.45085	3.98141
	0.0844792	4.44818	4.52926	4.44704	4.51626	0.452357	3.94941
	0.0911458	4.41529	4.49609	4.41396	4.48323	0.453485	3.9174
	0.0978125	4.38245	4.463	4.381	4.45013	0.454274	3.88545
	0.104479	4.3497	4.4301	4.34804	4.41711	0.454698	3.85357
	0.111146	4.3171	4.39733	4.31538	4.38409	0.454881	3.8218
	0.117813	4.28452	4.36471	4.28271	4.35118	0.455118	3.79003
	0.124479	4.25219	4.33228	4.25029	4.31836	0.455464	3.75845
	0.131146	4.21992	4.29997	4.21798	4.28568	0.45583	3.72698
	0.137813	4.18784	4.26792	4.18591	4.25327	0.456396	3.69557
	0.144479	4.15591	4.23595	4.15403	4.22103	0.457021	3.66428
	0.151146	4.12414	4.20423	4.12232	4.1891	0.4578	3.63312
	0.157812	4.09271	4.17282	4.09091	4.15754	0.458618	3.60207
	0.164479	4.06143	4.14144	4.05967	4.12613	0.459414	3.57109
	0.171146	4.03031	4.1103	4.0285	4.09513	0.460091	3.54028
	0.177813	3.99952	4.07934	3.99762	4.0643	0.460361	3.50947
	0.184479	3.96884	4.0485	3.96675	4.03361	0.460312	3.47879
	0.191146	3.93842	4.01786	3.93605	4.00312	0.460039	3.44811
	0.197813	3.90821	3.98731	3.90548	3.97271	0.459644	3.4176
	0.204479	3.87806	3.95686	3.87496	3.94239	0.459267	3.38721
	0.211146	3.84812	3.92653	3.8445	3.91212	0.459143	3.35701
	0.217812	3.81839	3.89633	3.81422	3.88199	0.459454	3.32692
	0.224479	3.78875	3.86631	3.784	3.85204	0.460038	3.29708
	0.231146	3.75935	3.83646	3.75402	3.82224	0.460857	3.26759
	0.237813	3.73006	3.80684	3.72422	3.79273	0.461633	3.23834
	0.244479	3.70096	3.77742	3.69459	3.76349	0.462229	3.20939
	0.251146	3.67199	3.74826	3.66515	3.7346	0.462318	3.18068
	0.257812	3.6432	3.71939	3.636	3.70609	0.462116	3.15227
	0.264479	3.61464	3.69075	3.60709	3.67788	0.44015	3.1241
	0.271146	3.58626	3.66235	3.57848	3.64996	0.438745	3.09617
	0.277813	3.55813	3.63413	3.55011	3.62229	0.437297	3.06842
	0.284479	3.53015	3.60612	3.52204	3.59486	0.435959	3.04091
	0.291146	3.50238	3.57834	3.49426	3.56764	0.434871	3.0135
	0.297812	3.47494	3.55081	3.46684	3.54064	0.433815	2.98611
	0.304479	3.4477	3.52344	3.43972	3.51377	0.432687	2.95901
	0.311146	3.42093	3.49641	3.41296	3.4871	0.431322	2.9319
	0.317812	3.39448	3.46971	3.38656	3.46069	0.42963	2.90498
	0.324479	3.36844	3.44336	3.36051	3.43454	0.427638	2.87818
	0.331146	3.34289	3.41733	3.33488	3.40867	0.425664	2.85167
	0.337813	3.31774	3.39169	3.30961	3.38305	0.423835	2.82528
	0.344479	3.29302	3.36643	3.28463	3.35784	0.365554	2.79907
	0.351146	3.26865	3.34151	3.26008	3.333	0.306593	2.77322
	0.357812	3.24464	3.31689	3.23582	3.30847	0.303975	2.74768
	0.364479	3.22091	3.2926	3.21186	3.28424	0.301277	2.72249
	0.371146	3.19731	3.26858	3.18813	3.26036	0.29857	2.69767
	0.377812	3.17388	3.24481	3.16471	3.23676	0.295837	2.67326
	0.384479	3.1505	3.22129	3.1414	3.21343	0.292936	2.64921
	0.391146	3.12725	3.19807	3.11834	3.1904	0.289823	2.62564
	0.397813	3.10417	3.17516	3.09545	3.16761	0.286652	2.60237
	0.404479	3.08127	3.15253	3.07274	3.14505	0.283499	2.57951
	0.411146	3.05857	3.13017	3.05021	3.12277	0.28066	2.55696
	0.417812	3.03628	3.10817	3.02792	3.10074	0.278182	2.53482
	0.424479	3.01429	3.08646	3.00586	3.07899	0.276072	2.51298
	0.431146	2.99273	3.06507	2.98411	3.05752	0.274071	2.49149
	0.437812	2.97159	3.04399	2.96271	3.03643	0.271871	2.47024
	0.444479	2.95091	3.02318	2.94161	3.01564	0.269244	2.44935
	0.451146	2.93061	3.00271	2.92087	2.99523	0.266269	2.42869
	0.457813	2.91072	2.98251	2.90054	2.97517	0.263084	2.40828
	0.464479	2.89117	2.96253	2.88057	2.95551	0.259941	2.38816
	0.471146	2.87188	2.94282	2.86102	2.93614	0.257202	2.36822
	0.477812	2.85286	2.92342	2.84177	2.9171	0.254881	2.34863
	0.484479	2.83409	2.90428	2.82288	2.89841	0.252831	2.3291
	0.491146	2.81549	2.88535	2.80428	2.8799	0.250824	2.30993
	0.497812	2.79714	2.86677	2.78598	2.86172	0.248572	2.29106
	0.504479	2.77908	2.84856	2.7681	2.84382	0.246001	2.27256
	0.511146	2.76133	2.83062	2.75052	2.82616	0.24322	2.25428
	0.517813	2.74388	2.81306	2.73329	2.80881	0.240325	2.23637
	0.524479	2.7268	2.79585	2.71648	2.79182	0.237502	2.21882
	0.531146	2.71001	2.77905	2.70003	2.77501	0.234761	2.20169
	0.537813	2.69363	2.7625	2.68394	2.75856	0.232031	2.18473
	0.544479	2.6775	2.7463	2.6682	2.74234	0.229323	2.16813
	0.551146	2.66166	2.73046	2.65276	2.72642	0.226644	2.15171
	0.557813	2.64619	2.71493	2.63762	2.71087	0.223863	2.13552
	0.564479	2.63099	2.69964	2.62272	2.69553	0.220957	2.11939
	0.571146	2.61597	2.68461	2.608	2.68052	0.218058	2.10351
	0.577812	2.60131	2.66994	2.59346	2.66582	0.215219	2.08779
	0.584479	2.58695	2.65556	2.57915	2.6515	0.212488	2.0722
	0.591146	2.57292	2.64145	2.56503	2.6374	0.209971	2.0569
	0.597812	2.55923	2.62769	2.55108	2.62375	0.207401	2.04179
	0.604479	2.546	2.61432	2.53749	2.6105	0.204735	2.02716
	0.611146	2.53306	2.60119	2.5242	2.59758	0.202109	2.01277
	0.617812	2.52055	2.58843	2.51126	2.58507	0.199597	1.99885
	0.624479	2.50846	2.57591	2.49869	2.57288	0.197234	1.98523
	0.631146	2.49665	2.56372	2.48647	2.56093	0.195003	1.97203
	0.637813	2.4851	2.55181	2.47461	2.5493	0.192793	1.95925
	0.644479	2.4739	2.54017	2.46316	2.53796	0.190399	1.94681
	0.651146	2.46287	2.52882	2.45202	2.52689	0.187697	1.93462
	0.657813	2.45215	2.51773	2.44117	2.516	0.184894	1.92272
	0.664479	2.44154	2.50693	2.43062	2.50528	0.182072	1.91106
	0.671146	2.43125	2.49652	2.42031	2.49491	0.187697	1.89964
	0.677813	2.42118	2.48638	2.41035	2.48467	0.182737	1.8884
	0.684479	2.41136	2.47655	2.40064	2.4747	0.192072	1.87734
	0.691146	2.40186	2.46705	2.39122	2.46509	0.156177	1.86658
	0.697812	2.39269	2.45794	2.38222	2.4557	0.105429	1.85599
	0.704479	2.38375	2.44898	2.37352	2.44653	0.114147	1.84571
	0.711146	2.37513	2.44036	2.36511	2.43777	0.124234	1.83578
	0.717812	2.3669	2.43193	2.35707	2.42923	0.135169	1.82616
	0.724479	2.35885	2.4238	2.34926	2.42098	0.146177	1.81683
	0.731146	2.35103	2.41583	2.34169	2.41294	0.156485	1.80791
	0.737812	2.34342	2.408	2.33424	2.40515	0.165484	1.79929
	0.744479	2.33595	2.40038	2.32697	2.39758	0.172503	1.79097
	0.751146	2.32864	2.39302	2.31981	2.39018	0.176532	1.78294
	0.757812	2.32139	2.38566	2.31266	2.38285	0.17563	1.77515
	0.764479	2.31433	2.37858	2.30563	2.3757	0.16697	1.76754
	0.771146	2.3074	2.37161	2.29877	2.36866	0.147738	1.75998
	0.777813	2.30064	2.36482	2.29204	2.3618	0.117077	1.75255
	0.784479	2.29407	2.35829	2.28554	2.3551	0.122409	1.74523
	0.791146	2.28781	2.3519	2.27922	2.34855	0.123911	1.73797
	0.797813	2.2818	2.34575	2.2732	2.34225	0.125179	1.73071
	0.804479	2.27608	2.3399	2.26748	2.33619	0.126316	1.72363
	0.811146	2.27061	2.33424	2.26206	2.33038	0.127467	1.71662
	0.817813	2.26541	2.32889	2.25681	2.32477	0.128861	1.70983
	0.824479	2.26033	2.3236	2.25174	2.31938	0.13058	1.70312
	0.831146	2.2555	2.31864	2.24692	2.3143	0.132748	1.6967
	0.837812	2.25082	2.3138	2.24221	2.30932	0.135272	1.69052
	0.844479	2.2462	2.30902	2.23756	2.30445	0.138118	1.68459
	0.851146	2.24163	2.30435	2.23303	2.29969	0.141155	1.67883
	0.857812	2.23714	2.29977	2.22862	2.29511	0.144465	1.67325
	0.864479	2.23276	2.29528	2.22433	2.29059	0.14843	1.66792
	0.871146	2.2285	2.29094	2.22021	2.28618	0.153513	1.66275
	0.877812	2.22442	2.2867	2.21634	2.28185	0.160739	1.65752
	0.884479	2.22045	2.28251	2.21252	2.27763	0.171478	1.65247
	0.891146	2.21667	2.27839	2.20889	2.27351	0.1878	1.64748
	0.897813	2.21308	2.27454	2.20537	2.26959	0.212369	1.64261
	0.904479	2.2097	2.27075	2.20203	2.26587	0.248939	1.63785
	0.911146	2.2064	2.26711	2.1987	2.2623	0.302084	1.63316
	0.917813	2.20332	2.26362	2.19548	2.25893	0.377118	1.6287
	0.924479	2.20031	2.26023	2.19226	2.25584	0.479954	1.62448
	0.931146	2.19741	2.25698	2.1891	2.25277	0.616744	1.62051
	0.937813	2.19452	2.25382	2.186	2.24997	0.793379	1.61689
	0.944479	2.19168	2.25081	2.18302	2.24721	1.01451	1.61357
	0.951146	2.18884	2.24786	2.18016	2.24448	1.28316	1.61049
	0.957812	2.18601	2.24501	2.17736	2.24186	1.59973	1.6077
	0.964479	2.18324	2.24232	2.17479	2.23931	1.96215	1.60509
	0.971146	2.18054	2.23976	2.17241	2.23681	2.36565	1.60261
	0.977812	2.178	2.23731	2.17026	2.23439	2.8026	1.60029
	0.984479	2.17558	2.23496	2.16818	2.23196	3.26293	1.59797
	0.991146	2.17335	2.2327	2.16627	2.22969	3.7345	1.59565
	0.997812	2.17136	2.23067	2.16454	2.22763	4.20398	1.59327
	1.00448	2.16953	2.22867	2.16287	2.22559	4.65788	1.59083
	1.01115	2.16781	2.22666	2.1612	2.22365	5.08354	1.58833
	1.01781	2.16617	2.22474	2.1596	2.22176	5.47003	1.58571
	1.02448	2.1647	2.22286	2.15799	2.22003	5.8084	1.58303
	1.03115	2.16327	2.22101	2.15644	2.21823	6.09199	1.58029
	1.03781	2.16173	2.21907	2.15483	2.21643	6.31682	1.5775
	1.04448	2.16024	2.2171	2.15322	2.21463	6.48153	1.57477
	1.05115	2.15859	2.21511	2.15155	2.21286	6.58726	1.57203
	1.05781	2.157	2.21317	2.15	2.21105	6.63717	1.56936
	1.06448	2.15535	2.21125	2.14839	2.20935	6.63595	1.56681
	1.07115	2.1537	2.20936	2.1469	2.20771	6.58906	1.56438
	1.07781	2.15193	2.20756	2.14529	2.20612	6.50272	1.56207
	1.08448	2.15022	2.20579	2.1438	2.20455	6.38329	1.55987
	1.09115	2.14857	2.20417	2.14225	2.20308	6.23718	1.55779
	1.09781	2.14698	2.20265	2.14076	2.2017	6.07055	1.55583
	1.10448	2.14538	2.20117	2.13927	2.2003	5.8889	1.55387
	1.11115	2.14398	2.19991	2.13778	2.19889	5.69741	1.55197
	1.11781	2.14262	2.19872	2.13641	2.19752	5.50031	1.55005
	1.12448	2.14131	2.19755	2.13504	2.19601	5.30133	1.54797
	1.13115	2.14013	2.19648	2.13373	2.19446	5.10318	1.54582
	1.13781	2.13894	2.19536	2.13242	2.19283	4.90776	1.54349
	1.14448	2.13776	2.19426	2.13116	2.19121	4.71632	1.54098
	1.15115	2.13663	2.19313	2.12997	2.18953	4.52968	1.53836
	1.15781	2.13539	2.19196	2.12866	2.18791	4.34857	1.53568
	1.16448	2.13413	2.19075	2.12741	2.1862	4.17383	1.53295
	1.17115	2.13277	2.18933	2.12598	2.18457	4.00609	1.53021
	1.17781	2.1314	2.18785	2.12455	2.1829	3.84561	1.52753
	1.18448	2.12992	2.18626	2.12306	2.18127	3.69245	1.52499
	1.19115	2.12849	2.18459	2.12163	2.17966	3.54638	1.52255
	1.19781	2.12701	2.18282	2.12008	2.17809	3.40691	1.52037
	1.20448	2.12559	2.18103	2.11865	2.17648	3.27365	1.51823
	1.21115	2.12411	2.17921	2.11716	2.17486	3.14609	1.51621
	1.21781	2.12267	2.17735	2.11579	2.1732	3.02402	1.5142
	1.22448	2.12112	2.17545	2.11436	2.17151	2.90707	1.51229
	1.23115	2.11964	2.17367	2.11293	2.16979	2.795	1.51026
	1.23781	2.11809	2.17182	2.11155	2.16806	2.68768	1.50823
	1.24448	2.11648	2.17009	2.11018	2.16627	2.58491	1.50614
	1.25115	2.11487	2.16843	2.10875	2.16455	2.48644	1.5041
	1.25781	2.11325	2.16686	2.10738	2.16278	2.39245	1.50213
	1.26448	2.11152	2.1653	2.10595	2.16104	2.30323	1.5001
	1.27115	2.10985	2.16381	2.10452	2.15932	2.219	1.49825
	1.27781	2.10818	2.16244	2.10309	2.15771	2.1399	1.49653
	1.28448	2.10651	2.16119	2.10172	2.15622	2.06557	1.49486
	1.29115	2.10496	2.16	2.10035	2.15479	1.99558	1.49326
	1.29781	2.10347	2.15881	2.09904	2.15341	1.92943	1.49165
	1.30448	2.10204	2.15767	2.09779	2.15217	1.86668	1.49011
	1.31115	2.10067	2.15648	2.09653	2.15096	1.80705	1.48851
	1.31781	2.09931	2.15525	2.09534	2.14982	1.75032	1.48696
	1.32448	2.09811	2.15398	2.09421	2.14859	1.69631	1.48541
	1.33115	2.09693	2.15256	2.09308	2.14743	1.64486	1.48387
	1.33781	2.0958	2.15108	2.09194	2.14618	1.5957	1.4825
	1.34448	2.09468	2.14955	2.09075	2.14485	1.54863	1.48119
	1.35115	2.0936	2.14793	2.08968	2.14345	1.50345	1.48006
	1.35781	2.09246	2.14624	2.08849	2.14194	1.45996	1.47893
	1.36448	2.09128	2.14461	2.0873	2.14045	1.41814	1.47791
	1.37115	2.09019	2.14296	2.0861	2.13881	1.3778	1.4769
	1.37781	2.08894	2.14124	2.08485	2.13719	1.33888	1.47582
	1.38448	2.08768	2.1396	2.0836	2.1355	1.30122	1.47461
	1.39115	2.08623	2.13786	2.08223	2.13376	1.26471	1.47312
	1.39781	2.08481	2.1362	2.08086	2.13211	1.22945	1.47144
	1.40448	2.0833	2.13449	2.07949	2.13036	1.19526	1.46945
	1.41115	2.08162	2.13269	2.078	2.12863	1.16205	1.46724
	1.41781	2.07988	2.13089	2.07645	2.1268	1.12979	1.46498
	1.42448	2.07803	2.12898	2.07484	2.12495	1.09811	1.46253
	1.43115	2.07611	2.12699	2.07317	2.123	1.06707	1.45996
	1.43781	2.07414	2.12496	2.07144	2.12104	1.03676	1.45734
	1.44448	2.07217	2.1228	2.06959	2.11891	1.00726	1.45484
	1.45115	2.07014	2.12058	2.06763	2.11676	0.978872	1.45234
	1.45781	2.06805	2.11838	2.0656	2.1145	0.951885	1.44983
	1.46448	2.06602	2.11612	2.06351	2.11212	0.926405	1.44733
	1.47115	2.06399	2.11384	2.06137	2.10972	0.90241	1.44483
	1.47781	2.06199	2.11162	2.05916	2.10729	0.87982	1.44227
	1.48448	2.0601	2.10949	2.05702	2.10489	0.85816	1.43976
	1.49115	2.05827	2.10752	2.05493	2.10259	0.837202	1.43714
	1.49781	2.05649	2.10561	2.05302	2.10026	0.816794	1.43465
	1.50448	2.05472	2.1038	2.05112	2.09807	0.797009	1.43214
	1.51115	2.053	2.10203	2.04945	2.09594	0.777829	1.42971
	1.51781	2.05133	2.10024	2.04784	2.09385	0.759253	1.42744
	1.52448	2.04954	2.09844	2.04635	2.0918	0.741142	1.42512
	1.53115	2.04773	2.09649	2.0448	2.08975	0.723515	1.42298
	1.53781	2.04574	2.09443	2.04319	2.08762	0.195901	1.42083
	1.54448	2.0437	2.09231	2.04146	2.08546	0.193904	1.41862
	1.55115	2.04152	2.09	2.03961	2.08312	0.192017	1.41647
	1.55781	2.03924	2.08764	2.03758	2.08075	0.190121	1.4142
	1.56448	2.03684	2.08524	2.03538	2.07821	0.188267	1.412
	1.57115	2.03444	2.08276	2.03305	2.07553	0.186327	1.40967
	1.57781	2.03195	2.08034	2.03061	2.07284	0.184492	1.40722
	1.58448	2.0295	2.07794	2.02817	2.06999	0.183011	1.40478
	1.59115	2.02694	2.07551	2.0256	2.06717	0.182214	1.40221
	1.59781	2.02444	2.07313	2.02316	2.06431	0.182232	1.39958
	1.60448	2.02188	2.07075	2.02066	2.06145	0.182862	1.39684
	1.61115	2.01931	2.0683	2.01815	2.05859	0.183906	1.39403
	1.61781	2.01669	2.06586	2.01565	2.05574	0.185146	1.3911
	1.62448	2.014	2.06328	2.01315	2.05283	0.186584	1.38812
	1.63115	2.0112	2.06067	2.01046	2.05006	0.188433	1.38513
	1.63781	2.00847	2.05806	2.00784	2.04733	0.190707	1.38222
	1.64448	2.00566	2.05535	2.0051	2.04461	0.193552	1.3793
	1.65115	2.00273	2.05255	2.00224	2.04192	0.196647	1.37656
	1.65781	1.9998	2.04967	1.99926	2.03927	0.199873	1.37376
	1.66448	1.99681	2.04672	1.99628	2.0366	0.202836	1.37097
	1.67115	1.99377	2.04368	1.99318	2.03392	0.20536	1.36824
	1.67781	1.99077	2.04062	1.99008	2.0312	0.207422	1.36549
	1.68448	1.98773	2.03752	1.98698	2.02846	0.209043	1.36257
	1.69115	1.98474	2.03434	1.98388	2.02555	0.210389	1.35958
	1.69781	1.98177	2.03113	1.98078	2.02261	0.211627	1.35635
	1.70448	1.97885	2.02804	1.9778	2.01957	0.212743	1.35301
	1.71115	1.976	2.0249	1.97482	2.01644	0.179429	1.34955
	1.71781	1.97321	2.02176	1.97196	2.01326	0.177007	1.34603
	1.72448	1.97042	2.01869	1.96916	2.0101	0.174694	1.34251
	1.73115	1.96767	2.01557	1.96642	2.00683	0.172177	1.33899
	1.73781	1.96476	2.01231	1.96368	2.00359	0.169294	1.33559
	1.74448	1.96184	2.00908	1.96099	2.00035	0.166078	1.33226
	1.75115	1.95878	2.00566	1.95819	1.99709	0.162761	1.32904
	1.75781	1.95549	2.00212	1.95539	1.99383	0.159559	1.32588
	1.76448	1.95208	1.99852	1.95253	1.99051	0.156686	1.32272
	1.77115	1.94849	1.99481	1.94955	1.9872	0.15411	1.31962
	1.77781	1.94472	1.99102	1.94651	1.98375	0.151862	1.31652
	1.78448	1.94091	1.98728	1.94335	1.98027	0.149885	1.3133
	1.79115	1.93703	1.98369	1.94013	1.97678	0.148103	1.31009
	1.79781	1.93315	1.97999	1.93679	1.97314	0.146409	1.30675
	1.80448	1.92922	1.97642	1.93334	1.96945	0.144594	1.30324
	1.81115	1.92534	1.97289	1.92976	1.96568	0.142605	1.29978
	1.81781	1.92148	1.96934	1.92612	1.96192	0.140282	1.29608
	1.82448	1.91772	1.96587	1.92243	1.95801	0.137697	1.29239
	1.83115	1.9139	1.96228	1.91861	1.95406	0.134952	1.28857
	1.83781	1.9101	1.95867	1.9148	1.95011	0.132233	1.28469
	1.84448	1.9064	1.9551	1.91104	1.94618	0.12973	1.28081
	1.85115	1.90271	1.95142	1.90729	1.94222	0.127662	1.27693
	1.85781	1.8991	1.94769	1.90359	1.93839	0.125876	1.27306
	1.86448	1.89552	1.94393	1.90002	1.9345	0.124221	1.26924
	1.87115	1.89197	1.94016	1.8965	1.93078	0.1224	1.26543
	1.87781	1.88851	1.9364	1.89304	1.92711	0.120251	1.26174
	1.88448	1.88498	1.93251	1.88959	1.92341	0.117873	1.25817
	1.89115	1.88141	1.92859	1.88601	1.91972	0.115522	1.2546
	1.89781	1.87783	1.9247	1.88243	1.91599	0.113304	1.25109
	1.90448	1.87417	1.92067	1.87874	1.91225	0.111331	1.24751
	1.91115	1.87036	1.91668	1.87492	1.90843	0.109365	1.24387
	1.91781	1.8666	1.91279	1.87105	1.90453	0.10735	1.24011
	1.92448	1.86264	1.90882	1.86706	1.9006	0.105213	1.23636
	1.93115	1.85866	1.90497	1.86306	1.89664	0.10328	1.2326
	1.93781	1.85473	1.90122	1.85919	1.89271	0.101478	1.22872
	1.94448	1.8508	1.89741	1.85531	1.88875	0.100018	1.22491
	1.95115	1.84695	1.89377	1.85162	1.88496	0.0986873	1.22104
	1.95781	1.84314	1.8902	1.8481	1.88115	0.0973943	1.21729
	1.96448	1.83933	1.88651	1.84458	1.87742	0.0960788	1.2136
	1.97115	1.83554	1.88285	1.84119	1.87372	0.0945832	1.20997
	1.97781	1.83172	1.87915	1.83773	1.87007	0.0930932	1.2064
	1.98448	1.82786	1.87542	1.83421	1.86643	0.0914498	1.20295
	1.99115	1.82398	1.87159	1.83064	1.86275	0.0897174	1.1995
	1.99781	1.81999	1.86767	1.82682	1.85904	0.087948	1.1961
	2.00448	1.81605	1.86383	1.82283	1.85527	0.086148	1.19265
	2.01115	1.81198	1.85982	1.81854	1.85144	0.0842868	1.18925
	2.01781	1.80805	1.85589	1.81407	1.84764	0.0825063	1.18572
	2.02448	1.80411	1.85194	1.80942	1.84372	0.0805589	1.18214
	2.03115	1.80023	1.848	1.80465	1.83984	0.0785472	1.17844
	2.03781	1.79647	1.84406	1.79982	1.8359	0.0763521	1.17461
	2.04448	1.79279	1.84021	1.79499	1.83201	0.0741155	1.17067
	2.05115	1.78921	1.83645	1.79023	1.82813	0.0720238	1.16655
	2.05781	1.78571	1.83268	1.78558	1.82434	0.07023	1.16244
	2.06448	1.78233	1.82911	1.78111	1.82059	0.0686476	1.1582
	2.07115	1.77898	1.82547	1.77675	1.81682	0.0672377	1.15403
	2.07781	1.77561	1.82187	1.77246	1.81321	0.065944	1.14992
	2.08448	1.77246	1.81843	1.76835	1.80965	0.0645788	1.14593
	2.09115	1.76929	1.81495	1.76442	1.80614	0.0632883	1.14212
	2.09781	1.7662	1.81145	1.76054	1.80267	0.0619308	1.13849
	2.10448	1.76321	1.8081	1.75685	1.7993	0.0605022	1.1351
	2.11115	1.76022	1.80468	1.75327	1.79592	0.0590117	1.13188
	2.11781	1.75722	1.80126	1.74981	1.7926	0.0575676	1.12878
	2.12448	1.75423	1.79784	1.74648	1.78929	0.0561395	1.12581
	2.13115	1.75124	1.79448	1.74332	1.78602	0.0547265	1.12301
	2.13781	1.74819	1.79125	1.74034	1.78298	0.0532869	1.12027
	2.14448	1.74521	1.78833	1.73759	1.78011	0.0517351	1.11753
	2.15115	1.74224	1.78579	1.73509	1.77771	0.0501301	1.11484
	2.15781	1.73944	1.78382	1.73301	1.77574	0.0485042	1.11222
	2.16448	1.73677	1.78259	1.73134	1.77453	0.0470664	1.10967
	2.17115	1.7344	1.78243	1.73038	1.77427	0.0458281	1.10723
	2.17781	1.73238	1.78371	1.73038	1.77514	0.0448438	1.10479
	2.18448	1.73085	1.78677	1.73163	1.77757	0.0440481	1.10253
	2.19115	1.72984	1.79214	1.73479	1.78174	0.0432646	1.10039
	2.19781	1.72949	1.80038	1.74046	1.78827	0.0424001	1.09842
	2.20448	1.72998	1.81233	1.74958	1.79779	0.0414327	1.09669
	2.21115	1.73148	1.82884	1.76352	1.81091	0.0404439	1.09526
	2.21781	1.73416	1.85108	1.78385	1.82861	0.0394583	1.09431
	2.22448	1.73833	1.88034	1.81282	1.85209	0.0385125	1.09395
	2.23115	1.7443	1.91838	1.85341	1.88277	0.0374056	1.09443
	2.23781	1.75271	1.96739	1.90961	1.92241	0.036174	1.09604
	2.24448	1.76403	2.02979	1.98662	1.97307	0.03489	1.09902
	2.25115	1.77912	2.10879	2.09111	2.03725	0.0337109	1.10385
	2.25781	1.79896	2.20831	2.23166	2.11785	0.0328464	1.11118
	2.26448	1.82472	2.33296	2.41882	2.21833	0.0323652	1.12173
	2.27115	1.85797	2.4884	2.66528	2.34263	0.0321227	1.13658
	2.27781	1.90059	2.68115	2.98584	2.49539	0.0318093	1.15696
	2.28448	1.95494	2.91907	3.39729	2.68197	0.031382	1.18467
	2.29115	2.02414	3.21127	3.91817	2.90875	0.0306313	1.22174
	2.29781	2.11236	3.56877	4.56887	3.18337	0.0297086	1.27067
	2.30448	2.22512	4.00465	5.37127	3.51542	0.028747	1.33445
	2.31115	2.37026	4.53513	6.35004	3.91716	0.0281844	1.41653
	2.31781	2.55908	5.18088	7.53415	4.4046	0.0280729	1.52066
	2.32448	2.80788	5.96834	8.96013	4.99932	0.0285508	1.65107
	2.33115	3.13989	6.93199	10.6764	5.72992	0.0295574	1.81249
	2.33781	3.58737	8.11674	12.749	6.63451	0.0310609	2.01015
	2.34448	4.19409	9.58021	15.2681	7.76217	0.033012	2.25
	2.35115	5.01713	11.395	18.3542	9.1754	0.0358035	2.53932
	2.35781	6.12849	13.6506	22.1629	10.951	0.0394068	2.88718
	2.36448	7.61499	16.4539	26.8871	13.1804	0.0439024	3.30561
	2.37115	9.57711	19.9282	32.7543	15.9685	0.0490237	3.81004
	2.37781	12.1257	24.2113	40.0199	19.4319	0.0542398	4.42081
	2.38448	15.3776	29.4514	48.955	23.6944	0.059207	5.16336
	2.39115	19.4486	35.8013	59.8285	28.8826	0.063742	6.06853
	2.39781	24.447	43.4113	72.8866	35.1196	0.067955	7.17169
	2.40448	30.4652	52.4228	88.3312	42.5192	0.0720649	8.51113
	2.41115	37.5735	62.9607	106.299	51.1795	0.0764004	10.1255
	2.41781	45.8141	75.1272	126.843	61.1788	0.0811232	12.0501
	2.42448	55.1979	88.9992	149.925	72.5727	0.0862232	14.3128
	2.43115	65.704	104.627	175.408	85.3943	0.091818	16.9301
	2.43781	77.2822	122.036	203.068	99.656	0.0980556	19.903
	2.44448	89.8575	141.236	232.602	115.357	0.105429	23.2146
	2.45115	103.338	162.229	263.655	132.49	0.114147	26.8291
	2.45781	117.625	185.026	295.84	151.053	0.124234	30.6918
	2.46448	132.619	209.66	328.775	171.064	0.135169	34.7319
	2.47115	148.237	236.202	362.103	192.568	0.146177	38.866
	2.47781	164.412	264.782	395.523	215.654	0.156485	43.0038
	2.48448	181.107	295.594	428.809	240.46	0.165484	47.0529
	2.49115	198.318	328.909	461.822	267.175	0.172503	50.9248
	2.49781	216.073	365.071	494.518	296.04	0.176532	54.5398
	2.50448	234.431	404.487	526.943	327.339	0.17563	57.8302
	2.51115	253.477	447.605	559.224	361.375	0.16697	60.7435
	2.51781	273.31	494.887	591.549	398.456	0.147738	63.2424
	2.52448	294.033	546.762	624.141	438.858	0.117077	65.3053
	2.53115	315.737	603.586	657.232	482.793	0.0792646	66.9245
	2.53781	338.483	665.589	691.031	530.377	0.0454223	68.1042
	2.54448	362.292	732.832	725.691	581.599	0.0346313	68.8587
	2.55115	387.128	805.167	761.286	636.294	0.0710963	69.2092
	2.55781	412.89	882.209	797.79	694.13	0.179316	69.1828
	2.56448	439.408	963.33	835.062	754.604	0.377828	68.8095
	2.57115	466.444	1047.67	872.845	817.052	0.67332	68.1216
	2.57781	493.695	1134.15	910.773	880.672	1.05762	67.1521
	2.58448	520.813	1221.53	948.388	944.558	1.50865	65.9341
	2.59115	547.413	1308.47	985.165	1007.74	1.99426	64.4998
	2.59781	573.099	1393.57	1020.54	1069.23	2.47907	62.8804
	2.60448	597.482	1475.49	1053.95	1128.09	2.93061	61.1055
	2.61115	620.197	1552.94	1084.85	1183.43	3.32432	59.2035
	2.61781	640.924	1624.79	1112.77	1234.48	3.64588	57.2004
	2.62448	659.401	1690.11	1137.29	1280.64	3.89081	55.1208
	2.63115	675.431	1748.19	1158.13	1321.43	4.06288	52.9872
	2.63781	688.889	1798.54	1175.08	1356.55	4.17096	50.8202
	2.64448	699.721	1840.91	1188.06	1385.89	4.22678	48.6389
	2.65115	707.941	1875.28	1197.09	1409.45	4.2428	46.4602
	2.65781	713.625	1901.82	1202.3	1427.42	4.23052	44.2996
	2.66448	716.903	1920.88	1203.86	1440.06	4.19971	42.1706
	2.67115	717.95	1932.94	1202.07	1447.77	4.15873	40.0854
	2.67781	716.973	1938.61	1197.24	1451	4.11885	38.0542
	2.68448	714.206	1938.55	1189.73	1450.27	4.10603	36.0859
	2.69115	709.898	1933.48	1179.93	1446.12	4.17789	34.1876
	2.69781	704.304	1924.14	1168.21	1439.1	4.42977	32.3651
	2.70448	697.675	1911.25	1154.98	1429.77	4.9727	30.6227
	2.71115	690.254	1895.52	1140.59	1418.62	5.8802	28.9635
	2.71781	682.264	1877.59	1125.39	1406.15	7.12257	27.3892
	2.72448	673.906	1858.04	1109.68	1392.77	8.52973	25.9005
	2.73115	665.353	1837.38	1093.72	1378.84	9.8167	24.497
	2.73781	656.744	1816.02	1077.74	1364.63	10.671	23.1777
	2.74448	648.187	1794.29	1061.89	1350.36	10.8617	21.9408
	2.75115	639.755	1772.43	1046.29	1336.15	10.3177	20.7841
	2.75781	631.489	1750.59	1031.02	1322.08	9.14167	19.705
	2.76448	623.405	1728.87	1016.11	1308.17	7.56002	18.7005
	2.77115	615.494	1707.29	1001.55	1294.38	5.84102	17.7677
	2.77781	607.735	1685.84	987.321	1280.65	4.21911	16.9037
	2.78448	600.093	1664.48	973.383	1266.92	2.84915	16.1053
	2.79115	592.532	1643.17	959.682	1253.11	1.79661	15.3696
	2.79781	585.017	1621.87	946.169	1239.14	1.05388	14.6935
	2.80448	577.52	1600.53	932.802	1224.97	0.569262	14.074
	2.81115	570.022	1579.15	919.548	1210.56	0.275379	13.508
	2.81781	562.515	1557.73	906.388	1195.92	0.109195	12.9923
	2.82448	555.003	1536.31	893.319	1181.05	0.0218427	12.5236
	2.83115	547.499	1514.94	880.348	1166	-0.019839	12.0983
	2.83781	540.025	1493.68	867.496	1150.81	-0.0361841	11.7129
	2.84448	532.611	1472.61	854.793	1135.56	-0.0387873	11.3634
	2.85115	525.288	1451.81	842.275	1120.32	-0.0339522	11.0461
	2.85781	518.09	1431.36	829.978	1105.15	-0.0252692	10.7569
	2.86448	511.05	1411.33	817.942	1090.14	-0.0145937	10.4918
	2.87115	504.196	1391.8	806.199	1075.34	-0.0029341	10.2472
	2.87781	497.554	1372.81	794.78	1060.82	0.00922013	10.0192
	2.88448	491.143	1354.4	783.706	1046.6	0.0213713	9.80469
	2.89115	484.974	1336.58	772.993	1032.72	0.0331865	9.60061
	2.89781	479.053	1319.36	762.644	1019.2	0.0443047	9.40439
	2.90448	473.378	1302.73	752.656	1006.03	0.0545272	9.21383
	2.91115	467.94	1286.65	743.016	993.213	0.0636781	9.02733
	2.91781	462.725	1271.07	733.703	980.721	0.0716007	8.84351
	2.92448	457.712	1255.93	724.687	968.524	0.0782818	8.66147
	2.93115	452.875	1241.16	715.934	956.581	0.0837554	8.48081
	2.93781	448.186	1226.68	707.401	944.844	0.0881722	8.30116
	2.94448	443.612	1212.41	699.044	933.261	0.0917325	8.12265
	2.95115	439.119	1198.24	690.814	921.776	0.0947565	7.94538
	2.95781	434.672	1184.09	682.66	910.328	0.0973849	7.76967
	2.96448	430.234	1169.87	674.531	898.857	0.0997526	7.59604
	2.97115	425.769	1155.47	666.375	887.301	0.101946	7.42485
	2.97781	421.243	1140.81	658.141	875.601	0.103866	7.25676
	2.98448	416.621	1125.81	649.781	863.699	0.105678	7.0922
	2.99115	411.871	1110.38	641.248	851.54	0.107314	6.93174
	2.99781	406.966	1094.46	632.502	839.075	0.10889	6.77575
	3.00448	401.879	1077.98	623.506	826.262	0.110543	6.6246
	3.01115	396.59	1060.92	614.232	813.068	0.112214	6.47869
	3.01781	391.083	1043.23	604.657	799.47	0.113882	6.33832
	3.02448	385.35	1024.91	594.768	785.455	0.115517	6.20368
	3.03115	379.387	1005.96	584.562	771.025	0.117193	6.07495
	3.03781	373.197	986.412	574.045	756.194	0.118938	5.95235
	3.04448	366.789	966.301	563.23	740.988	0.120712	5.83583
	3.05115	360.18	945.686	552.142	725.446	0.122409	5.72556
	3.05781	353.391	924.641	540.811	709.617	0.123911	5.62168
	3.06448	346.447	903.247	529.276	693.56	0.125179	5.52435
	3.07115	339.379	881.596	517.579	677.339	0.126316	5.43363
	3.07781	332.219	859.784	505.766	661.023	0.127467	5.34977
	3.08448	325.002	837.91	493.887	644.682	0.128861	5.27312
	3.09115	317.763	816.072	481.989	628.387	0.13058	5.2041
	3.09781	310.537	794.364	470.122	612.206	0.132748	5.14324
	3.10448	303.358	772.876	458.333	596.201	0.135272	5.09138
	3.11115	296.26	751.69	446.666	580.432	0.138118	5.0496
	3.11781	289.271	730.882	435.162	564.952	0.141155	5.01914
	3.12448	282.421	710.518	423.861	549.808	0.144465	5.00168
	3.13115	275.732	690.658	412.798	535.042	0.14843	4.99917
	3.13781	269.228	671.353	402.002	520.69	0.153513	5.01378
	3.14448	262.924	652.649	391.504	506.783	0.160739	5.04799
	3.15115	256.837	634.585	381.327	493.348	0.171478	5.10432
	3.15781	250.976	617.194	371.494	480.41	0.1878	5.18544
	3.16448	245.35	600.507	362.023	467.988	0.212369	5.2938
	3.17115	239.964	584.55	352.932	456.101	0.248939	5.43144
	3.17781	234.819	569.345	344.234	444.765	0.302084	5.60023
	3.18448	229.916	554.912	335.94	433.993	0.377118	5.80104
	3.19115	225.25	541.266	328.06	423.798	0.479954	6.03434
	3.19781	220.817	528.418	320.6	414.186	0.616744	6.2994
	3.20448	216.608	516.374	313.563	405.162	0.793379	6.59492
	3.21115	212.614	505.133	306.948	396.728	1.01451	6.91852
	3.21781	208.821	494.686	300.751	388.876	1.28316	7.26685
	3.22448	205.218	485.017	294.964	381.595	1.59973	7.63605
	3.23115	201.787	476.099	289.574	374.867	1.96215	8.02152
	3.23781	198.514	467.896	284.563	368.665	2.36565	8.4179
	3.24448	195.379	460.36	279.907	362.956	2.8026	8.81994
	3.25115	192.367	453.436	275.579	357.7	3.26293	9.22216
	3.25781	189.457	447.058	271.547	352.847	3.7345	9.61884
	3.26448	186.635	441.155	267.775	348.346	4.20398	10.0048
	3.27115	183.881	435.65	264.225	344.138	4.65788	10.375
	3.27781	181.181	430.464	260.858	340.165	5.08354	10.7248
	3.28448	178.521	425.516	257.632	336.365	5.47003	11.0502
	3.29115	175.888	420.73	254.509	332.679	5.8084	11.3478
	3.29781	173.274	416.03	251.451	329.051	6.09199	11.6147
	3.30448	170.669	411.352	248.425	325.429	6.31682	11.8486
	3.31115	168.068	406.637	245.4	321.768	6.48153	12.0478
	3.31781	165.468	401.835	242.352	318.03	6.58726	12.2112
	3.32448	162.868	396.909	239.261	314.185	6.63717	12.3385
	3.33115	160.267	391.829	236.111	310.21	6.63595	12.4294
	3.33781	157.667	386.579	232.893	306.091	6.58906	12.4846
	3.34448	155.071	381.151	229.603	301.823	6.50272	12.5048
	3.35115	152.481	375.545	226.24	297.406	6.38329	12.4916
	3.35781	149.902	369.771	222.807	292.848	6.23718	12.4462
	3.36448	147.336	363.845	219.308	288.163	6.07055	12.3708
	3.37115	144.788	357.788	215.753	283.366	5.8889	12.2676
	3.37781	142.259	351.626	212.15	278.48	5.69741	12.139
	3.38448	139.753	345.387	208.51	273.527	5.50031	11.9878
	3.39115	137.272	339.102	204.844	268.532	5.30133	11.8166
	3.39781	134.818	332.802	201.164	263.521	5.10318	11.6285
	3.40448	132.393	326.518	197.479	258.52	4.90776	11.4267
	3.41115	130	320.28	193.803	253.552	4.71632	11.2141
	3.41781	127.64	314.117	190.144	248.641	4.52968	10.9937
	3.42448	125.315	308.053	186.514	243.808	4.34857	10.7685
	3.43115	123.029	302.112	182.922	239.072	4.17383	10.5411
	3.43781	120.782	296.312	179.375	234.448	4.00609	10.3141
	3.44448	118.578	290.667	175.883	229.948	3.84561	10.0894
	3.45115	116.417	285.187	172.45	225.58	3.69245	9.86884
	3.45781	114.302	279.876	169.081	221.349	3.54638	9.65373
	3.46448	112.232	274.736	165.78	217.256	3.40691	9.44494
	3.47115	110.208	269.762	162.549	213.299	3.27365	9.24312
	3.47781	108.23	264.948	159.388	209.472	3.14609	9.04834
	3.48448	106.294	260.284	156.296	205.768	3.02402	8.86047
	3.49115	104.401	255.758	153.272	202.178	2.90707	8.67909
	3.49781	102.546	251.358	150.314	198.692	2.795	8.50374
	3.50448	100.728	247.072	147.419	195.299	2.68768	8.33369
	3.51115	98.9443	242.89	144.584	191.991	2.58491	8.16835
	3.51781	97.193	238.803	141.806	188.76	2.48644	8.00693
	3.52448	95.4727	234.805	139.085	185.6	2.39245	7.84886
	3.53115	93.7825	230.894	136.419	182.508	2.30323	7.69383
	3.53781	92.1226	227.071	133.808	179.481	2.219	7.54142
	3.54448	90.4941	223.34	131.254	176.523	2.1399	7.39145
	3.55115	88.8988	219.709	128.758	173.635	2.06557	7.24382
	3.55781	87.3395	216.188	126.325	170.824	1.99558	7.09856
	3.56448	85.8193	212.789	123.957	168.096	1.92943	6.9558
	3.57115	84.3418	209.523	121.659	165.46	1.86668	6.81555
	3.57781	82.9109	206.403	119.436	162.922	1.80705	6.6781
	3.58448	81.5302	203.439	117.293	160.491	1.75032	6.54344
	3.59115	80.2028	200.638	115.232	158.172	1.69631	6.41172
	3.59781	78.9318	198.007	113.258	155.97	1.64486	6.2831
	3.60448	77.7186	195.547	111.372	153.887	1.5957	6.15727
	3.61115	76.5645	193.257	109.576	151.924	1.54863	6.03443
	3.61781	75.4692	191.129	107.869	150.078	1.50345	5.91421
	3.62448	74.4315	189.154	106.25	148.344	1.45996	5.79667
	3.63115	73.4492	187.319	104.716	146.714	1.41814	5.68146
	3.63781	72.5193	185.609	103.263	145.18	1.3778	5.56852
	3.64448	71.638	184.006	101.888	143.732	1.33888	5.45766
	3.65115	70.8007	182.493	100.583	142.357	1.30122	5.34864
	3.65781	70.0029	181.05	99.3438	141.045	1.26471	5.24155
	3.66448	69.2397	179.66	98.164	139.784	1.22945	5.13616
	3.67115	68.5061	178.307	97.0378	138.562	1.19526	5.03246
	3.67781	67.7977	176.977	95.9594	137.371	1.16205	4.93067
	3.68448	67.1101	175.658	94.9238	136.201	1.12979	4.8307
	3.69115	66.4398	174.34	93.9263	135.047	1.09811	4.73272
	3.69781	65.7834	173.017	92.9627	133.901	1.06707	4.63693
	3.70448	65.1385	171.684	92.0301	132.761	1.03676	4.54365
	3.71115	64.503	170.339	91.1258	131.624	1.00726	4.45311
	3.71781	63.8754	168.982	90.2478	130.489	0.978872	4.36567
	3.72448	63.2549	167.615	89.3947	129.358	0.951885	4.28163
	3.73115	62.641	166.24	88.5659	128.23	0.926405	4.2014
	3.73781	62.0337	164.862	87.761	127.109	0.90241	4.12535
	3.74448	61.4333	163.486	86.9803	125.997	0.87982	4.05394
	3.75115	60.8408	162.118	86.2242	124.899	0.85816	3.98731
	3.75781	60.2569	160.763	85.4937	123.818	0.837202	3.92598
	3.76448	59.6828	159.429	84.7899	122.759	0.816794	3.87
	3.77115	59.1203	158.121	84.1143	121.726	0.797009	3.81946
	3.77781	58.5707	156.849	83.4684	120.724	0.777829	3.77457
	3.78448	58.0362	155.618	82.8543	119.759	0.759253	3.73517
	3.79115	57.5186	154.437	82.2739	118.836	0.741142	3.70113
	3.79781	57.0202	153.312	81.7295	117.959	0.723515	3.67204
	3.80448	56.5432	152.252	81.2235	117.134	0.706407	3.64766
	3.81115	56.0899	151.263	80.7582	116.367	0.689911	3.62745
	3.81781	55.6626	150.353	80.3361	115.66	0.674163	3.61077
	3.82448	55.2638	149.528	79.9599	115.02	0.658992	3.59707
	3.83115	54.8959	148.795	79.632	114.451	0.644285	3.58575
	3.83781	54.561	148.159	79.3548	113.955	0.629931	3.57593
	3.84448	54.2615	147.627	79.1307	113.537	0.615797	3.567
	3.85115	53.9993	147.201	78.9617	113.2	0.601903	3.55824
	3.85781	53.7764	146.887	78.8496	112.944	0.587836	3.54889
	3.86448	53.5942	146.686	78.7959	112.773	0.573503	3.53846
	3.87115	53.4542	146.601	78.8013	112.686	0.55863	3.5263
	3.87781	53.3572	146.632	78.8664	112.684	0.543151	3.51199
	3.88448	53.3036	146.777	78.9909	112.764	0.527228	3.49499
	3.89115	53.2936	147.034	79.1739	112.924	0.510637	3.47514
	3.89781	53.3263	147.399	79.4135	113.162	0.493124	3.45225
	3.90448	53.4008	147.864	79.7074	113.472	0.474016	3.42631
	3.91115	53.5151	148.424	80.0519	113.848	0.452615	3.39711
	3.91781	53.6669	149.067	80.443	114.283	0.428638	3.36499
	3.92448	53.8531	149.783	80.8753	114.77	0.401699	3.32989
	3.93115	54.0702	150.559	81.3432	115.3	0.372253	3.29217
	3.93781	54.3141	151.383	81.8402	115.862	0.340633	3.25194
	3.94448	54.5801	152.238	82.3587	116.448	0.307136	3.20951
	3.95115	54.8633	153.111	82.8914	117.045	0.272309	3.16505
	3.95781	55.1583	153.985	83.4299	117.643	0.236786	3.11886
	3.96448	55.4595	154.845	83.9661	118.231	0.201363	3.07124
	3.97115	55.7612	155.674	84.4914	118.799	0.166945	3.02242
	3.97781	56.0573	156.458	84.9974	119.334	0.134422	2.97264
	3.98448	56.3421	157.181	85.4754	119.827	0.10484	2.92216
	3.99115	56.6099	157.829	85.9178	120.269	0.0789814	2.87137
	3.99781	56.855	158.39	86.3166	120.649	0.0577201	2.82041
	4.00448	57.0724	158.851	86.6648	120.96	0.0416571	2.76951
	4.01115	57.2572	159.203	86.9558	121.194	0.0311586	2.71897
	4.01781	57.4048	159.437	87.184	121.346	0.0259941	2.6689
	4.02448	57.5115	159.544	87.344	121.408	0.0258939	2.61961
	4.03115	57.5739	159.52	87.4318	121.378	0.030011	2.57103
	4.03781	57.5892	159.361	87.4441	121.252	0.0377356	2.52347
	4.04448	57.5551	159.062	87.3782	121.028	0.0481249	2.47704
	4.05115	57.4703	158.624	87.2327	120.704	0.0606222	2.43161
	4.05781	57.3337	158.046	87.0067	120.281	0.0744963	2.38745
	4.06448	57.1449	157.33	86.7003	119.76	0.0892648	2.34454
	4.07115	56.9041	156.479	86.3144	119.142	0.104384	2.30299
	4.07781	56.6121	155.497	85.8505	118.43	0.119401	2.26282
	4.08448	56.2703	154.388	85.3111	117.628	0.133794	2.2242
	4.09115	55.8804	153.159	84.699	116.739	0.147113	2.18696
	4.09781	55.4448	151.817	84.0178	115.77	0.158992	2.15132
	4.10448	54.966	150.37	83.2716	114.723	0.169306	2.11723
	4.11115	54.4471	148.825	82.4648	113.607	0.178175	2.0847
	4.11781	53.8912	147.191	81.6022	112.425	0.185702	2.05377
	4.12448	53.3018	145.477	80.689	111.185	0.192124	2.02445
	4.13115	52.6825	143.693	79.7304	109.893	0.197384	1.99673
	4.13781	52.037	141.847	78.7319	108.556	0.201558	1.97056
	4.14448	51.3688	139.948	77.6988	107.179	0.204665	1.94588
	4.15115	50.6818	138.006	76.6368	105.769	0.206703	1.92257
	4.15781	49.9794	136.03	75.5511	104.333	0.207779	1.90063
	4.16448	49.2653	134.027	74.447	102.876	0.207924	1.88001
	4.17115	48.5429	132.005	73.3296	101.403	0.207203	1.86039
	4.17781	47.8152	129.974	72.2038	99.9211	0.205894	1.84179
	4.18448	47.0853	127.939	71.0739	98.4344	0.20415	1.82392
	4.19115	46.356	125.908	69.9445	96.9481	0.202186	1.80681
	4.19781	45.6297	123.886	68.8192	95.4669	0.200102	1.79019
	4.20448	44.9087	121.88	67.7018	93.9948	0.197996	1.77405
	4.21115	44.195	119.895	66.5954	92.5363	0.195901	1.75808
	4.21781	43.4904	117.935	65.5029	91.0946	0.193904	1.74235
	4.22448	42.7964	116.005	64.4271	89.6735	0.192017	1.72674
	4.23115	42.1144	114.109	63.3702	88.2762	0.190121	1.71124
	4.23781	41.4458	112.252	62.3343	86.9055	0.188267	1.69562
	4.24448	40.7915	110.435	61.3213	85.5642	0.186327	1.68011
	4.25115	40.1527	108.663	60.3327	84.2548	0.184492	1.66449
	4.25781	39.5303	106.939	59.3704	82.9796	0.183011	1.64899
	4.26448	38.9249	105.266	58.4353	81.7407	0.182214	1.6336
	4.27115	38.3377	103.646	57.5291	80.5402	0.182232	1.61851
	4.27781	37.7694	102.083	56.6526	79.3801	0.182862	1.60378
	4.28448	37.2207	100.577	55.807	78.2625	0.183906	1.58972
	4.29115	36.6923	99.1329	54.9931	77.189	0.185146	1.57643
	4.29781	36.1849	97.7511	54.2117	76.1618	0.186584	1.56416
	4.30448	35.6993	96.4339	53.4636	75.1829	0.188433	1.55308
	4.31115	35.2361	95.1834	52.7493	74.2543	0.190707	1.54356
	4.31781	34.7962	94.0015	52.0696	73.3785	0.193552	1.53558
	4.32448	34.38	92.8899	51.425	72.5576	0.196647	1.52945
	4.33115	33.9883	91.8503	50.8161	71.7942	0.199873	1.52528
	4.33781	33.6216	90.8845	50.2433	71.0907	0.202836	1.52326
	4.34448	33.2807	89.9941	49.7071	70.4498	0.20536	1.52338
	4.35115	32.9663	89.1808	49.2079	69.8741	0.207422	1.52575
	4.35781	32.6788	88.4458	48.7461	69.3663	0.209043	1.5304
	4.36448	32.4189	87.7905	48.3221	68.9286	0.210389	1.53731
	4.37115	32.187	87.2155	47.936	68.5633	0.211627	1.54642
	4.37781	31.9834	86.7215	47.5877	68.2721	0.212743	1.55762
	4.38448	31.8085	86.3082	47.2772	68.056	0.21343	1.5708
	4.39115	31.6624	85.9751	47.0042	67.9155	0.213459	1.58582
	4.39781	31.5446	85.7208	46.768	67.8501	0.212749	1.60228
	4.40448	31.4549	85.543	46.5679	67.8581	0.211376	1.61999
	4.41115	31.3926	85.4387	46.4029	67.937	0.209544	1.63854
	4.41781	31.3567	85.4042	46.2717	68.0827	0.207505	1.65768
	4.42448	31.3457	85.4346	46.1727	68.2903	0.205444	1.67694
	4.43115	31.3582	85.5244	46.1042	68.5535	0.203307	1.69584
	4.43781	31.3921	85.6675	46.0642	68.8652	0.201052	1.71426
	4.44448	31.4454	85.8569	46.0505	69.2173	0.198843	1.73184
	4.45115	31.5156	86.0855	46.0609	69.601	0.196845	1.74835
	4.45781	31.6002	86.346	46.0927	70.0076	0.195158	1.76384
	4.46448	31.6966	86.6309	46.1436	70.4279	0.193987	1.77813
	4.47115	31.802	86.9334	46.2111	70.8531	0.193264	1.79142
	4.47781	31.914	87.2467	46.293	71.2751	0.192612	1.80388
	4.48448	32.0302	87.5648	46.3868	71.6862	0.19195	1.81561
	4.49115	32.1483	87.8827	46.4908	72.0801	0.190969	1.82695
	4.49781	32.2663	88.1962	46.6032	72.4513	0.189593	1.83822
	4.50448	32.3828	88.5024	46.7229	72.7961	0.187888	1.84949
	4.51115	32.4967	88.7994	46.8488	73.1116	0.185979	1.86106
	4.51781	32.6072	89.0865	46.9806	73.3966	0.184003	1.87323
	4.52448	32.714	89.3642	47.1182	73.6513	0.182166	1.88617
	4.53115	32.8172	89.6341	47.2618	73.877	0.180472	1.89994
	4.53781	32.9174	89.8989	47.4123	74.0762	0.178878	1.91484
	4.54448	33.0157	90.1623	47.5709	74.2526	0.177295	1.93094
	4.55115	33.1134	90.4287	47.7393	74.4108	0.175484	1.94858
	4.55781	33.2121	90.7035	47.9192	74.5557	0.173216	1.96771
	4.56448	33.3137	90.9922	48.1128	74.6932	0.170463	1.98869
	4.57115	33.4205	91.3012	48.3226	74.8295	0.16701	2.01152
	4.57781	33.5348	91.6371	48.5511	74.9708	0.163016	2.03637
	4.58448	33.6591	92.0063	48.8012	75.1237	0.158738	2.06344
	4.59115	33.796	92.4155	49.0756	75.2945	0.154388	2.09277
	4.59781	33.948	92.8712	49.3773	75.4896	0.150082	2.12431
	4.60448	34.1178	93.3796	49.7092	75.715	0.146045	2.15804
	4.61115	34.3076	93.9465	50.0739	75.9761	0.142155	2.19387
	4.61781	34.5199	94.5771	50.4739	76.2783	0.138237	2.23177
	4.62448	34.7567	95.2764	50.9117	76.626	0.134211	2.27146
	4.63115	35.0199	96.048	51.3895	77.0231	0.130163	2.31282
	4.63781	35.3109	96.8952	51.9086	77.473	0.126162	2.35561
	4.64448	35.6311	97.8201	52.4706	77.9779	0.122352	2.39954
	4.65115	35.9814	98.8238	53.0763	78.5394	0.118776	2.44436
	4.65781	36.362	99.9062	53.7258	79.1584	0.115238	2.48971
	4.66448	36.7731	101.066	54.4189	79.8346	0.111702	2.53526
	4.67115	37.2143	102.301	55.1547	80.5668	0.108095	2.58074
	4.67781	37.6848	103.607	55.9317	81.3532	0.10449	2.62569
	4.68448	38.183	104.978	56.7477	82.1906	0.100995	2.6698
	4.69115	38.7073	106.41	57.5998	83.0755	0.0977107	2.71272
	4.69781	39.2553	107.893	58.4846	84.0029	0.0945069	2.75409
	4.70448	39.8245	109.42	59.3981	84.9674	0.0913854	2.79355
	4.71115	40.4116	110.981	60.3353	85.9628	0.0884029	2.83086
	4.71781	41.0131	112.565	61.2913	86.9821	0.0856963	2.8656
	4.72448	41.6251	114.162	62.2603	88.0178	0.0833824	2.89761
	4.73115	42.2435	115.759	63.2359	89.0618	0.0814773	2.92651
	4.73781	42.8639	117.344	64.2118	90.1059	0.0798881	2.9522
	4.74448	43.4817	118.906	65.1812	91.1413	0.0784585	2.97438
	4.75115	44.0922	120.432	66.1371	92.1594	0.0771701	2.99292
	4.75781	44.6906	121.909	67.0723	93.1511	0.0759519	3.00752
	4.76448	45.272	123.325	67.9798	94.1078	0.074886	3.01796
	4.77115	45.8318	124.67	68.8527	95.0208	0.0740323	3.02411
	4.77781	46.3653	125.931	69.684	95.8816	0.0735112	3.02585
	4.78448	46.8679	127.098	70.4672	96.6825	0.0731752	3.02281
	4.79115	47.3356	128.161	71.1961	97.4158	0.0730582	3.01494
	4.79781	47.7642	129.112	71.8648	98.0744	0.0729368	3.00219
	4.80448	48.1499	129.942	72.4682	98.652	0.0727772	2.98442
	4.81115	48.4896	130.645	73.0013	99.1429	0.072465	2.96165
	4.81781	48.7801	131.214	73.4602	99.542	0.0719013	2.93399
	4.82448	49.0189	131.644	73.841	99.8452	0.0710265	2.90167
	4.83115	49.204	131.933	74.1411	100.049	0.069912	2.86477
	4.83781	49.3336	132.077	74.3583	100.151	0.068432	2.8237
	4.84448	49.4068	132.075	74.4911	100.15	0.0667604	2.77875
	4.85115	49.4226	131.928	74.5385	100.045	0.0650558	2.73036
	4.85781	49.381	131.635	74.5005	99.8353	0.0636925	2.67891
	4.86448	49.2821	131.2	74.3775	99.5227	0.0627024	2.62486
	4.87115	49.1267	130.625	74.1704	99.1086	0.062073	2.5686
	4.87781	48.9156	129.914	73.881	98.5956	0.0614937	2.51055
	4.88448	48.6503	129.071	73.5112	97.9865	0.0606537	2.45125
	4.89115	48.3326	128.101	73.0635	97.2849	0.0594032	2.39106
	4.89781	47.9644	127.011	72.5408	96.495	0.0579208	2.33039
	4.90448	47.5481	125.807	71.9464	95.6213	0.0565301	2.26965
	4.91115	47.086	124.496	71.2838	94.6688	0.0556287	2.20921
	4.91781	46.5811	123.085	70.5571	93.6424	0.0552209	2.14961
	4.92448	46.036	121.581	69.7701	92.5476	0.055176	2.09108
	4.93115	45.4536	119.993	68.9272	91.3899	0.0550198	2.03398
	4.93781	44.837	118.328	68.0329	90.1749	0.0544665	1.97867
	4.94448	44.1893	116.593	67.0916	88.9081	0.0535606	1.92514
	4.95115	43.5135	114.798	66.1078	87.5952	0.0523083	1.87388
	4.95781	42.8128	112.949	65.0862	86.2417	0.0508915	1.82477
	4.96448	42.0901	111.054	64.0311	84.8532	0.0493981	1.77804
	4.97115	41.3486	109.12	62.947	83.4351	0.0478841	1.73363
	4.97781	40.5913	107.155	61.8383	81.9926	0.0464486	1.69166
	4.98448	39.821	105.164	60.7089	80.5306	0.0452547	1.65196
	4.99115	39.0405	103.154	59.563	79.0542	0.0442974	1.61459
	4.99781	38.2523	101.131	58.4043	77.5678	0.0437973	1.57942
	5.00448	37.4589	99.1003	57.2363	76.0758	0.0436645	1.54634
	5.01115	36.6628	97.0675	56.0626	74.5823	0.0438867	1.51523
	5.01781	35.8661	95.0375	54.8865	73.0911	0.0440648	1.48603
	5.02448	35.0709	93.015	53.7112	71.6059	0.0441259	1.45856
	5.03115	34.2791	91.0045	52.5394	70.1298	0.0440009	1.43263
	5.03781	33.4925	89.0103	51.374	68.6661	0.0438229	1.40808
	5.04448	32.7126	87.0366	50.2173	67.2175	0.0437986	1.38472
	5.05115	31.9411	85.087	49.072	65.7868	0.0441306	1.36242
	5.05781	31.1792	83.1652	47.9399	64.3763	0.0447699	1.34102
	5.06448	30.4282	81.2745	46.8232	62.9883	0.0455678	1.32046
	5.07115	29.6893	79.4177	45.7236	61.6248	0.0463105	1.30072
	5.07781	28.9635	77.5976	44.6428	60.2876	0.0467055	1.28159
	5.08448	28.2515	75.8163	43.5823	58.9784	0.046769	1.26335
	5.09115	27.5544	74.076	42.5434	57.6986	0.0467639	1.24577
	5.09781	26.8729	72.3781	41.5273	56.4495	0.046829	1.22902
	5.10448	26.2074	70.7242	40.5352	55.2321	0.0472235	1.21299
	5.11115	25.5587	69.1154	39.5681	54.0473	0.0479967	1.1978
	5.11781	24.9273	67.5526	38.6268	52.8959	0.0489351	1.18338
	5.12448	24.3135	66.0365	37.7121	51.7785	0.0497244	1.16973
	5.13115	23.7176	64.5676	36.8245	50.6953	0.0502621	1.15686
	5.13781	23.14	63.1462	35.9644	49.6468	0.0505379	1.14457
	5.14448	22.5806	61.7724	35.1323	48.6329	0.0505135	1.13294
	5.15115	22.0395	60.4462	34.328	47.6539	0.0503773	1.12191
	5.15781	21.5168	59.1671	33.5518	46.7094	0.0500967	1.11141
	5.16448	21.0123	57.935	32.8033	45.7993	0.0495219	1.10127
	5.17115	20.5259	56.7492	32.0824	44.9233	0.0485884	1.09149
	5.17781	20.0574	55.6092	31.3888	44.0809	0.0473799	1.08208
	5.18448	19.6066	54.514	30.7221	43.2713	0.0461008	1.0729
	5.19115	19.1733	53.4627	30.0816	42.4942	0.0449208	1.06378
	5.19781	18.7571	52.4545	29.4671	41.7484	0.0440287	1.05461
	5.20448	18.3578	51.4881	28.8778	41.0332	0.0433973	1.0455
	5.21115	17.9751	50.5622	28.313	40.3475	0.0430282	1.03609
	5.21781	17.6084	49.6755	27.7719	39.6901	0.042928	1.02638
	5.22448	17.2574	48.8266	27.2538	39.0599	0.0429459	1.01631
	5.23115	16.9215	48.0139	26.7578	38.4557	0.0431205	1.00588
	5.23781	16.6001	47.2358	26.2829	37.8762	0.0432698	0.994967
	5.24448	16.2927	46.4906	25.8284	37.3202	0.0433723	0.983699
	5.25115	15.9988	45.7769	25.3933	36.7867	0.0432532	0.972133
	5.25781	15.7179	45.0929	24.9767	36.2742	0.0429149	0.960329
	5.26448	15.4492	44.4371	24.5779	35.7818	0.0423924	0.94852
	5.27115	15.1924	43.8078	24.1959	35.3083	0.0416332	0.936778
	5.27781	14.9468	43.2036	23.8299	34.8526	0.0406791	0.925402
	5.28448	14.712	42.6228	23.4792	34.4138	0.0396524	0.914494
	5.29115	14.4875	42.0642	23.1431	33.991	0.0387324	0.904011
	5.29781	14.2726	41.5263	22.8206	33.583	0.0381164	0.894245
	5.30448	14.067	41.0077	22.5111	33.1892	0.0377797	0.88519
	5.31115	13.8701	40.5073	22.2139	32.8085	0.0374842	0.87691
	5.31781	13.6813	40.0236	21.9281	32.44	0.0370409	0.869346
	5.32448	13.5001	39.5557	21.6531	32.0832	0.0361308	0.862558
	5.33115	13.326	39.1026	21.388	31.7371	0.0347009	0.856537
	5.33781	13.1585	38.6633	21.1323	31.4012	0.0328907	0.851168
	5.34448	12.9971	38.237	20.8854	31.0749	0.0310554	0.846462
	5.35115	12.8413	37.8229	20.6468	30.7578	0.0295683	0.842404
	5.35781	12.6907	37.4205	20.4158	30.4491	0.0285462	0.838945
	5.36448	12.5448	37.0291	20.192	30.1488	0.0280921	0.836022
	5.37115	12.4034	36.6484	19.975	29.8565	0.0279341	0.83351
	5.37781	12.266	36.2779	19.7646	29.5719	0.0277388	0.831427
	5.38448	12.1323	35.9174	19.5603	29.2948	0.0272587	0.829817
	5.39115	12.002	35.5665	19.3621	29.0251	0.0264009	0.828383
	5.39781	11.8748	35.2251	19.1697	28.7628	0.0252152	0.827131
	5.40448	11.7507	34.8932	18.9831	28.508	0.0239226	0.826062
	5.41115	11.6292	34.5705	18.8021	28.2606	0.0226152	0.825052
	5.41781	11.5103	34.2571	18.6267	28.0208	0.0213464	0.823919
	5.42448	11.3939	33.9531	18.4569	27.7887	0.020226	0.822726
	5.43115	11.2796	33.6585	18.2928	27.5645	0.0190687	0.821241
	5.43781	11.1676	33.3735	18.1345	27.3484	0.0178616	0.819511
	5.44448	11.0576	33.0983	17.982	27.1405	0.0164928	0.817361
	5.45115	10.9496	32.833	17.8354	26.9412	0.0150872	0.81486
	5.45781	10.8436	32.578	17.695	26.7505	0.0138089	0.811876
	5.46448	10.7397	32.3336	17.5609	26.5687	0.0129995	0.808412
	5.47115	10.6377	32.0999	17.4334	26.3959	0.0128309	0.804536
	5.47781	10.5379	31.8772	17.3126	26.2324	0.0132059	0.800182
	5.48448	10.4403	31.6658	17.1989	26.0784	0.0136594	0.79547
	5.49115	10.345	31.466	17.0925	25.9338	0.0140319	0.790344
	5.49781	10.2521	31.2778	16.9935	25.7988	0.0140337	0.784984
	5.50448	10.1615	31.1013	16.902	25.6735	0.0137786	0.779442
	5.51115	10.0735	30.9367	16.8182	25.5578	0.0134856	0.773726
	5.51781	9.98795	30.7838	16.7421	25.4515	0.013304	0.768014
	5.52448	9.90487	30.6425	16.6736	25.3546	0.0133038	0.762293
	5.53115	9.82429	30.5128	16.6126	25.2668	0.0133163	0.756634
	5.53781	9.74633	30.3943	16.5589	25.1879	0.0133406	0.751154
	5.54448	9.67086	30.2866	16.5125	25.1174	0.0133149	0.745903
	5.55115	9.5979	30.1894	16.4728	25.055	0.013516	0.740958
	5.55781	9.52757	30.1023	16.4397	25.0002	0.014024	0.736666
	5.56448	9.45985	30.0245	16.4127	24.9524	0.0148667	0.733027
	5.57115	9.39463	29.9553	16.3915	24.9112	0.0160477	0.730283
	5.57781	9.33205	29.8941	16.3755	24.8758	0.0174429	0.728609
	5.58448	9.27198	29.84	16.3643	24.8456	0.0186498	0.728198
	5.59115	9.21447	29.7921	16.3573	24.8198	0.0195887	0.72945
	5.59781	9.15932	29.7495	16.3538	24.7975	0.020135	0.732378
	5.60448	9.10639	29.7112	16.3531	24.7781	0.0205034	0.737332
	5.61115	9.05568	29.6762	16.3546	24.7606	0.0210504	0.744421
	5.61781	9.00703	29.6437	16.3575	24.7441	0.0219309	0.753728
	5.62448	8.96018	29.6124	16.3611	24.7279	0.0233271	0.765595
	5.63115	8.91523	29.5815	16.3648	24.711	0.0250074	0.779839
	5.63781	8.87189	29.55	16.3676	24.6928	0.0270117	0.796589
	5.64448	8.83021	29.517	16.3691	24.6724	0.0292979	0.815895
	5.65115	8.79005	29.4817	16.3686	24.6492	0.0318344	0.837655
	5.65781	8.75143	29.4432	16.3655	24.6225	0.0347162	0.861968
	5.66448	8.71424	29.4008	16.3593	24.5917	0.037509	0.88849
	5.67115	8.67848	29.3538	16.3496	24.5561	0.0399939	0.91722
	5.67781	8.64399	29.3015	16.3358	24.5154	0.0420885	0.947912
	5.68448	8.6108	29.2435	16.3178	24.4688	0.0438846	0.980398
	5.69115	8.57874	29.1791	16.295	24.4162	0.0455447	1.01431
	5.69781	8.54781	29.108	16.2673	24.357	0.0471971	1.04936
	5.70448	8.51795	29.0299	16.2344	24.2911	0.0487467	1.08519
	5.71115	8.48892	28.9445	16.1962	24.2182	0.0500801	1.12149
	5.71781	8.46085	28.8517	16.1526	24.1384	0.0509218	1.1576
	5.72448	8.4336	28.7514	16.1035	24.0514	0.0512707	1.19324
	5.73115	8.40706	28.6436	16.049	23.9575	0.0510478	1.22799
	5.73781	8.38125	28.5284	15.989	23.8568	0.0501927	1.26137
	5.74448	8.3561	28.4061	15.9237	23.7494	0.0487408	1.2929
	5.75115	8.33154	28.2768	15.8533	23.6358	0.0465605	1.32228
	5.75781	8.30746	28.1408	15.778	23.5161	0.0438149	1.34916
	5.76448	8.28386	27.9984	15.6979	23.3907	0.0407104	1.37318
	5.77115	8.2606	27.8499	15.6132	23.26	0.0375325	1.39417
	5.77781	8.23766	27.6959	15.5242	23.1243	0.0345978	1.41187
	5.78448	8.21502	27.5367	15.4313	22.9841	0.032031	1.42618
	5.79115	8.19253	27.3727	15.3346	22.8398	0.0297153	1.43697
	5.79781	8.17012	27.2047	15.2345	22.692	0.0275089	1.44425
	5.80448	8.14796	27.033	15.1315	22.5409	0.0252027	1.44802
	5.81115	8.1259	26.8584	15.0257	22.3873	0.023074	1.44837
	5.81781	8.10398	26.6813	14.9176	22.2315	0.0214291	1.44528
	5.82448	8.08218	26.5025	14.8076	22.0742	0.0206848	1.43909
	5.83115	8.0606	26.3224	14.6962	21.9158	0.0210078	1.42973
	5.83781	8.03921	26.1417	14.5835	21.7567	0.0224705	1.41751
	5.84448	8.018	25.961	14.4701	21.5976	0.0247813	1.4026
	5.85115	7.99697	25.7807	14.3563	21.4388	0.027784	1.3852
	5.85781	7.97623	25.6015	14.2424	21.2809	0.0313596	1.36564
	5.86448	7.95571	25.4239	14.1287	21.1241	0.0354684	1.34399
	5.87115	7.93551	25.2482	14.0156	20.9691	0.0401084	1.32062
	5.87781	7.91559	25.0749	13.9031	20.8161	0.0451139	1.2957
	5.88448	7.89597	24.9046	13.7917	20.6654	0.0503127	1.26958
	5.89115	7.87678	24.7374	13.6817	20.5176	0.0554406	1.24244
	5.89781	7.85812	24.5738	13.5731	20.3727	0.0604643	1.2146
	5.90448	7.83987	24.4141	13.4662	20.2312	0.0654491	1.18634
	5.91115	7.82218	24.2585	13.3613	20.0932	0.0706632	1.15797
	5.91781	7.80514	24.1072	13.2587	19.9588	0.0763303	1.12972
	5.92448	7.78869	23.9604	13.1584	19.8284	0.0824609	1.10183
	5.93115	7.77291	23.8183	13.0608	19.7018	0.089006	1.0746
	5.93781	7.75784	23.6808	12.9659	19.5793	0.0955416	1.04821
	5.94448	7.74336	23.5482	12.8739	19.4608	0.10167	1.02282
	5.95115	7.72954	23.4202	12.7848	19.3463	0.107147	0.998463
	5.95781	7.71631	23.2969	12.6985	19.2358	0.111915	0.975404
	5.96448	7.70369	23.1782	12.6151	19.1292	0.116028	0.953483
	5.97115	7.69157	23.0639	12.5347	19.0264	0.119724	0.932928
	5.97781	7.67983	22.9537	12.4568	18.9273	0.122976	0.913554
	5.98448	7.66849	22.8476	12.3816	18.8316	0.125457	0.895375
	5.99115	7.65726	22.745	12.3087	18.7392	0.126958	0.878509
	5.99781	7.64622	22.6458	12.238	18.6497	0.127255	0.862824
	6.00448	7.63511	22.5496	12.1695	18.563	0.1264	0.848217
	6.01115	7.62402	22.4562	12.103	18.4788	0.12452	0.834801
	6.01781	7.61286	22.3651	12.0384	18.3969	0.121936	0.822392
	6.02448	7.60141	22.276	11.9755	18.3169	0.118575	0.811126
	6.03115	7.58974	22.1886	11.9143	18.2387	0.114449	0.800875
	6.03781	7.57776	22.1025	11.8546	18.1619	0.109592	0.791632
	6.04448	7.56538	22.0176	11.7963	18.0863	0.103983	0.783284
	6.05115	7.55253	21.9334	11.7393	18.0118	0.0977843	0.775835
	6.05781	7.53914	21.8496	11.6833	17.9379	0.0914266	0.769158
	6.06448	7.52514	21.7661	11.6284	17.8645	0.0850188	0.763322
	6.07115	7.51036	21.6824	11.5742	17.7913	0.0787624	0.758253
	6.07781	7.49468	21.5983	11.5206	17.718	0.0726302	0.753843
	6.08448	7.47811	21.5137	11.4675	17.6446	0.0666185	0.750211
	6.09115	7.46053	21.4284	11.4146	17.5709	0.0605944	0.747289
	6.09781	7.44191	21.3421	11.3621	17.4967	0.0544651	0.745144
	6.10448	7.42218	21.2547	11.3096	17.4223	0.0483222	0.743892
	6.11115	7.40144	21.1663	11.2572	17.3473	0.0422694	0.743534
	6.11781	7.37967	21.0766	11.205	17.272	0.0365301	0.744191
	6.12448	7.35685	20.9857	11.1529	17.1964	0.0313566	0.746093
	6.13115	7.33318	20.8936	11.1009	17.1205	0.0267276	0.749195
	6.13781	7.30856	20.8002	11.0491	17.0444	0.0226635	0.753783
	6.14448	7.28317	20.7056	10.9975	16.9682	0.018899	0.759922
	6.15115	7.25706	20.6097	10.9461	16.8918	0.0153478	0.767795
	6.15781	7.23013	20.5127	10.895	16.8154	0.0118479	0.777448
	6.16448	7.20265	20.4147	10.8441	16.7391	0.00838615	0.788956
	6.17115	7.17447	20.3156	10.7934	16.6627	0.00499107	0.802251
	6.17781	7.14569	20.2157	10.7429	16.5863	0.00174383	0.81727
	6.18448	7.11639	20.115	10.6925	16.5101	-0.001261	0.833664
	6.19115	7.08654	20.0135	10.6423	16.4338	-0.0040332	0.851077
	6.19781	7.05611	19.9113	10.5922	16.3575	-0.006515	0.869015
	6.20448	7.02513	19.8083	10.5419	16.2812	-0.0087544	0.886659
	6.21115	6.99338	19.7045	10.4915	16.2046	-0.0108392	0.903115
	6.21781	6.96091	19.5997	10.4407	16.1277	-0.012842	0.917354
	6.22448	6.92728	19.4938	10.3893	16.0499	-0.0147469	0.927905
	6.23115	6.89222	19.3864	10.3369	15.9711	-0.0166266	0.933512
	6.23781	6.85531	19.2772	10.2831	15.8906	-0.0183943	0.932378
	6.24448	6.81606	19.1658	10.2274	15.8079	-0.019961	0.922843
	6.25115	6.77382	19.0515	10.1693	15.7221	-0.021344	0.902932
	6.25781	6.72785	18.9339	10.1081	15.6324	-0.0226887	0.870619
	6.26448	6.67746	18.8122	10.043	15.5378	-0.0239958	0.824066
	6.27115	6.62158	18.6855	9.97293	15.4368	-0.0253251	0.76124
	6.27781	6.55924	18.5527	9.89705	15.3282	-0.0265406	0.680469
	6.28448	6.48927	18.413	9.81426	15.2105	-0.0273973	0.580094
	6.29115	6.41042	18.2649	9.72325	15.0819	-0.0277147	0.458853
	6.29781	6.32138	18.1072	9.62275	14.9408	-0.0276667	0.315863
	6.30448	6.22062	17.9385	9.51135	14.7852	-0.0276013	0.150701
	6.31115	6.10698	17.7576	9.38779	14.6133	-0.0279077	-0.0367524
	6.31781	5.97878	17.5628	9.25052	14.4234	-0.028745	-0.245843
	6.32448	5.83487	17.3531	9.09847	14.2138	-0.0299431	-0.475617
	6.33115	5.67406	17.1273	8.93039	13.9831	-0.0312441	-0.72434
	6.33781	5.49538	16.8843	8.74525	13.73	-0.032329	-0.989816
	6.34448	5.29827	16.6236	8.54254	13.4539	-0.0331515	-1.26936
	6.35115	5.08235	16.3448	8.32188	13.1544	-0.0335575	-1.55987
	6.35781	4.84796	16.0479	8.08316	12.8317	-0.0337393	-1.85778
	6.36448	4.59563	15.7334	7.8271	12.4865	-0.0339712	-2.15926
	6.37115	4.32667	15.4023	7.55453	12.1204	-0.0345208	-2.46026
	6.37781	4.04268	15.0561	7.26688	11.7351	-0.0355535	-2.75686
	6.38448	3.74581	14.6966	6.96594	11.3334	-0.0371346	-3.04493
	6.39115	3.43872	14.3263	6.65414	10.9183	-0.038871	-3.32053
	6.39781	3.12444	13.9481	6.33425	10.4936	-0.0402868	-3.58011
	6.40448	2.80638	13.565	6.00922	10.063	-0.0411651	-3.82038
	6.41115	2.48794	13.1806	5.68229	9.63102	-0.0414831	-4.03854
	6.41781	2.17285	12.7986	5.35691	9.20208	-0.0413634	-4.23207
	6.42448	1.86477	12.4224	5.03659	8.78051	-0.0410705	-4.39909
	6.43115	1.56714	12.0557	4.72456	8.3708	-0.0408008	-4.53827
	6.43781	1.28339	11.7023	4.42421	7.97726	-0.0407693	-4.64859
	6.44448	1.01667	11.3652	4.13865	7.60376	-0.0410258	-4.7296
	6.45115	0.769686	11.0476	3.87055	7.25393	-0.0416153	-4.78146
	6.45781	0.544851	10.752	3.62235	6.93077	-0.0423816	-4.80441
	6.46448	0.344098	10.4805	3.39603	6.6371	-0.0430367	-4.79935
	6.47115	0.168973	10.2348	3.19332	6.37493	-0.0433785	-4.7674
	6.47781	0.0204206	10.0163	3.01528	6.14576	-0.0434798	-4.70988
	6.48448	-0.100816	9.82572	2.86275	5.95062	-0.0435198	-4.62852
	6.49115	-0.194645	9.6634	2.73603	5.78994	-0.0439677	-4.52505
	6.49781	-0.261341	9.52912	2.63506	5.66355	-0.0448204	-4.40136
	6.50448	-0.301496	9.42252	2.55942	5.57097	-0.0460119	-4.25963
	6.51115	-0.316156	9.34271	2.50834	5.51107	-0.0472458	-4.10185
	6.51781	-0.306738	9.28835	2.48063	5.48228	-0.048272	-3.93024
	6.52448	-0.274674	9.25818	2.47508	5.48287	-0.0488541	-3.7469
	6.53115	-0.22179	9.25046	2.49004	5.51081	-0.0491785	-3.5539
	6.53781	-0.149916	9.26349	2.5239	5.56375	-0.0494672	-3.35326
	6.54448	-0.0611577	9.29534	2.57486	5.63943	-0.0499238	-3.14703
	6.55115	0.0427287	9.34414	2.64114	5.73536	-0.0505369	-2.93704
	6.55781	0.15949	9.40786	2.72071	5.84903	-0.0512858	-2.72497
	6.56448	0.287392	9.48467	2.81191	5.97803	-0.0520856	-2.51254
	6.57115	0.424419	9.57264	2.91282	6.12007	-0.0527738	-2.30129
	6.57781	0.568892	9.67002	3.02184	6.2728	-0.0533156	-2.09256
	6.58448	0.719088	9.77503	3.13735	6.43414	-0.0537512	-1.88769
	6.59115	0.873473	9.88615	3.25793	6.60212	-0.0539374	-1.68783
	6.59781	1.03056	10.0017	3.38215	6.77482	-0.0540432	-1.49412
	6.60448	1.189	10.1202	3.50875	6.95059	-0.0540136	-1.30743
	6.61115	1.34771	10.2404	3.63678	7.12783	-0.0539025	-1.12855
	6.61781	1.50542	10.3611	3.76511	7.30513	-0.0537573	-0.958327
	6.62448	1.66147	10.4811	3.8929	7.48123	-0.0537869	-0.797217
	6.63115	1.81481	10.5994	4.01938	7.65493	-0.0541835	-0.645706
	6.63781	1.96472	10.7151	4.14371	7.82525	-0.0549513	-0.504087
	6.64448	2.11082	10.8276	4.26549	7.99132	-0.0560371	-0.372487
	6.65115	2.25238	10.9361	4.3841	8.1523	-0.0570789	-0.251078
	6.65781	2.38906	11.0403	4.49908	8.30762	-0.057818	-0.139616
	6.66448	2.52056	11.1396	4.61012	8.45669	-0.0581074	-0.0379895
	6.67115	2.64662	11.2336	4.71687	8.59908	-0.058085	0.0540943
	6.67781	2.76697	11.3223	4.8191	8.73454	-0.0580097	0.136947
	6.68448	2.8816	11.4053	4.91667	8.86279	-0.0581286	0.211094
	6.69115	2.99045	11.4825	5.00947	8.98362	-0.0585354	0.276837
	6.69781	3.09338	11.5539	5.09745	9.09698	-0.0592072	0.334901
	6.70448	3.19043	11.6195	5.18048	9.20288	-0.0597877	0.385621
	6.71115	3.28169	11.6792	5.25874	9.30129	-0.0602768	0.429612
	6.71781	3.36722	11.7332	5.33217	9.3923	-0.0604676	0.46734
	6.72448	3.44709	11.7816	5.40078	9.47605	-0.0606041	0.499229
	6.73115	3.52146	11.8245	5.46473	9.5526	-0.0607632	0.525935
	6.73781	3.5905	11.8622	5.52398	9.62226	-0.0610437	0.547872
	6.74448	3.6545	11.8947	5.57888	9.68513	-0.0614508	0.565399
	6.75115	3.71343	11.9224	5.62936	9.74157	-0.0616555	0.579048
	6.75781	3.76779	11.9455	5.67561	9.79187	-0.0616237	0.58918
	6.76448	3.81764	11.9641	5.71781	9.83644	-0.0612292	0.596159
	6.77115	3.86341	11.9785	5.75626	9.87544	-0.0606417	0.600389
	6.77781	3.90513	11.9889	5.79089	9.90921	-0.0600419	0.602114
	6.78448	3.94323	11.9955	5.82212	9.93812	-0.0594124	0.601697
	6.79115	3.97773	11.9986	5.85002	9.96244	-0.0587489	0.599494
	6.79781	4.00892	11.9984	5.87481	9.9825	-0.0579519	0.595789
	6.80448	4.03707	11.9953	5.89675	9.99858	-0.0571207	0.590662
	6.81115	4.06233	11.9894	5.91594	10.0108	-0.0564533	0.584584
	6.81781	4.08481	11.981	5.93257	10.0196	-0.0560831	0.577541
	6.82448	4.10471	11.9704	5.94687	10.0252	-0.0559886	0.569796
	6.83115	4.12217	11.9577	5.95886	10.0278	-0.0560865	0.561629
	6.83781	4.13737	11.9433	5.96881	10.0278	-0.0560104	0.553046
	6.84448	4.15047	11.9273	5.97668	10.0253	-0.0556773	0.544228
	6.85115	4.16151	11.9099	5.9827	10.0206	-0.0550952	0.535227
	6.85781	4.1708	11.8912	5.98705	10.0139	-0.0544215	0.526167
	6.86448	4.17836	11.8714	5.98967	10.0055	-0.053775	0.517171
	6.87115	4.18433	11.8505	5.9908	9.9954	-0.0534631	0.508291
	6.87781	4.18874	11.8289	5.99051	9.9839	-0.0535602	0.499533
	6.88448	4.19184	11.8064	5.98902	9.97103	-0.0540365	0.49107
	6.89115	4.19355	11.7833	5.98633	9.95692	-0.0544638	0.482777
	6.89781	4.1941	11.7597	5.98258	9.94164	-0.0546474	0.474666
	6.90448	4.19356	11.7356	5.97799	9.92534	-0.054385	0.466791
	6.91115	4.19193	11.7111	5.9725	9.90806	-0.0537862	0.459102
	6.91781	4.18937	11.6863	5.96613	9.88995	-0.0531188	0.451644
	6.92448	4.18596	11.6612	5.95903	9.87102	-0.052649	0.444307
	6.93115	4.18171	11.6359	5.95129	9.85148	-0.0524691	0.437096
	6.93781	4.17689	11.6105	5.94282	9.83138	-0.0526111	0.430003
	6.94448	4.17152	11.5849	5.93382	9.81089	-0.0528831	0.423028
	6.95115	4.16563	11.5593	5.92434	9.79006	-0.0531884	0.416121
	6.95781	4.15937	11.5337	5.91445	9.76896	-0.0535605	0.409395
	6.96448	4.15283	11.5082	5.90414	9.74781	-0.0537292	0.402723
	6.97115	4.14618	11.483	5.89371	9.72664	-0.0537123	0.396114
	6.97781	4.13927	11.4581	5.8831	9.70545	-0.0534187	0.389499
	6.98448	4.13226	11.4335	5.87237	9.6845	-0.0529787	0.382946
	6.99115	4.12518	11.4095	5.8617	9.66375	-0.0526541	0.376394
	6.99781	4.11798	11.3858	5.85097	9.64321	-0.0525525	0.369891
	7.00448	4.11078	11.3628	5.84042	9.62307	-0.0528869	0.363277
	7.01115	4.10358	11.3403	5.82987	9.6032	-0.0534604	0.35672
	7.01781	4.09642	11.3185	5.8195	9.58374	-0.0538689	0.350159
	7.02448	4.08931	11.2972	5.80925	9.56456	-0.0540271	0.343725
	7.03115	4.08233	11.2765	5.79906	9.54569	-0.0538021	0.337341
	7.03781	4.07546	11.2564	5.78898	9.52711	-0.0535178	0.331024
	7.04448	4.06889	11.2369	5.77909	9.50878	-0.0535716	0.32489
	7.05115	4.06262	11.218	5.76937	9.4908	-0.0541219	0.318924
	7.05781	4.05664	11.1996	5.75989	9.47299	-0.0551491	0.313081
	7.06448	4.05104	11.1819	5.7506	9.45558	-0.0564975	0.307356
	7.07115	4.04585	11.1646	5.74166	9.43854	-0.0579019	0.30175
	7.07781	4.04101	11.148	5.73307	9.42187	-0.059361	0.296386
	7.08448	4.0366	11.1318	5.72473	9.4056	-0.0609249	0.291141
	7.09115	4.03249	11.116	5.7168	9.3898	-0.0627053	0.286194
	7.09781	4.02867	11.1008	5.70917	9.37443	-0.0649487	0.281425
	7.10448	4.02521	11.0859	5.70196	9.35955	-0.0676987	0.276898
	7.11115	4.02203	11.0715	5.69504	9.34508	-0.0709863	0.272673
	7.11781	4.01911	11.0576	5.68849	9.33108	-0.0745639	0.268801
	7.12448	4.01653	11.0442	5.68235	9.31747	-0.0784635	0.265164
	7.13115	4.01425	11.0312	5.67645	9.30423	-0.0825683	0.261826
	7.13781	4.01234	11.019	5.67096	9.29139	-0.0870001	0.258728
	7.14448	4.01083	11.0071	5.6659	9.27882	-0.0920487	0.255862
	7.15115	4.00976	10.9959	5.66119	9.26667	-0.097882	0.253179
	7.15781	4.00909	10.9852	5.65696	9.25488	-0.104581	0.250788
	7.16448	4.00886	10.9751	5.65314	9.24347	-0.112021	0.248636
	7.17115	4.00916	10.9655	5.64986	9.2325	-0.120146	0.246787
	7.17781	4.00983	10.9565	5.64706	9.22193	-0.128667	0.24523
	7.18448	4.01096	10.9478	5.6448	9.2118	-0.137508	0.244097
	7.19115	4.0124	10.9397	5.64295	9.20212	-0.146321	0.243376
	7.19781	4.01427	10.932	5.64164	9.19293	-0.154859	0.243081
	7.20448	4.01647	10.9248	5.64075	9.18416	-0.162775	0.243377
	7.21115	4.01893	10.9181	5.64021	9.17592	-0.169885	0.244152
	7.21781	4.02161	10.9118	5.64003	9.16805	-0.176288	0.245467
	7.22448	4.02453	10.906	5.64003	9.16066	-0.181934	0.247317
	7.23115	4.02757	10.9006	5.64027	9.15375	-0.186901	0.249708
	7.23781	4.0308	10.8958	5.64057	9.14726	-0.191343	0.25263
	7.24448	4.03399	10.8912	5.64092	9.14116	-0.195085	0.255912
	7.25115	4.03713	10.887	5.64122	9.1354	-0.198177	0.25973
	7.25781	4.04022	10.883	5.64146	9.13011	-0.200573	0.263841
	7.26448	4.04325	10.8794	5.6417	9.12519	-0.202165	0.268254
	7.27115	4.04615	10.8761	5.64182	9.1207	-0.202872	0.272896
	7.27781	4.04881	10.8729	5.64188	9.11667	-0.202524	0.277653
	7.28448	4.05141	10.8701	5.64194	9.11301	-0.20092	0.282347
	7.29115	4.05374	10.8676	5.64182	9.10994	-0.198156	0.286983
	7.29781	4.05613	10.8655	5.64182	9.1075	-0.194201	0.291498
	7.30448	4.05839	10.864	5.64182	9.10565	-0.189252	0.295839
	7.31115	4.06059	10.8628	5.64176	9.10434	-0.183522	0.300063
	7.31781	4.06275	10.8622	5.6417	9.10366	-0.177183	0.304106
	7.32448	4.06491	10.8623	5.64176	9.10365	-0.170567	0.307978
	7.33115	4.06705	10.8629	5.64182	9.10415	-0.163845	0.311737
	7.33781	4.06913	10.8639	5.64182	9.10527	-0.157372	0.315496
	7.34448	4.07128	10.8655	5.64188	9.10701	-0.151105	0.31907
	7.35115	4.07335	10.8677	5.642	9.10926	-0.145021	0.322531
	7.35781	4.0753	10.8703	5.64206	9.11215	-0.138954	0.325932
	7.36448	4.07723	10.8735	5.64218	9.11566	-0.132801	0.329149
	7.37115	4.079	10.8771	5.64218	9.11985	-0.126573	0.332251
	7.37781	4.08078	10.8812	5.64229	9.12476	-0.120447	0.335163
	7.38448	4.08248	10.8859	5.64235	9.13046	-0.114662	0.337721
	7.39115	4.08407	10.891	5.64241	9.13692	-0.109358	0.340104
	7.39781	4.08561	10.8967	5.64247	9.14409	-0.104568	0.342124
	7.40448	4.08715	10.9029	5.64253	9.1521	-0.100224	0.343786
	7.41115	4.08857	10.9095	5.64253	9.16076	-0.0961263	0.345037
	7.41781	4.08998	10.9165	5.64259	9.17002	-0.0923587	0.345927
	7.42448	4.09128	10.924	5.64265	9.17994	-0.0887965	0.34646
	7.43115	4.09245	10.9317	5.64271	9.19023	-0.0856358	0.346581
	7.43781	4.09351	10.9396	5.64271	9.20101	-0.0830253	0.346399
	7.44448	4.09458	10.9479	5.64289	9.21207	-0.0810054	0.345915
	7.45115	4.09552	10.9564	5.64319	9.2234	-0.0795306	0.34508
	7.45781	4.09635	10.965	5.64361	9.23497	-0.0783683	0.34406
	7.46448	4.09717	10.9738	5.6442	9.24655	-0.0774071	0.34274
	7.47115	4.09796	10.9826	5.64492	9.25822	-0.0765224	0.341243
	7.47781	4.09871	10.9914	5.64593	9.2697	-0.0757462	0.339501
	7.48448	4.09943	11.0002	5.64706	9.28112	-0.075361	0.337528
	7.49115	4.10008	11.009	5.64849	9.29226	-0.0755734	0.335369
	7.49781	4.10065	11.0175	5.65004	9.30307	-0.0764146	0.332915
	7.50448	4.10111	11.0257	5.65171	9.31348	-0.0776216	0.330284
	7.51115	4.10132	11.0337	5.65356	9.32348	-0.0789766	0.327474
	7.51781	4.10141	11.0412	5.65553	9.33285	-0.0803653	0.324545
	7.52448	4.10125	11.0483	5.65749	9.34161	-0.0818169	0.321437
	7.53115	4.10079	11.0549	5.65946	9.34977	-0.0834565	0.31833
	7.53781	4.10016	11.0611	5.66143	9.3572	-0.0855022	0.3151
	7.54448	4.0993	11.0667	5.66334	9.36398	-0.0880178	0.311866
	7.55115	4.09833	11.0718	5.66524	9.37001	-0.0912846	0.308634
	7.55781	4.09726	11.0765	5.66715	9.37543	-0.0952637	0.305401
	7.56448	4.09611	11.0807	5.66906	9.38016	-0.100178	0.302169
	7.57115	4.09492	11.0845	5.67091	9.38415	-0.105822	0.298995
	7.57781	4.09361	11.0878	5.67275	9.38743	-0.112072	0.295885
	7.58448	4.09224	11.0906	5.67454	9.38999	-0.118735	0.292957
	7.59115	4.09062	11.0929	5.67621	9.39182	-0.125457	0.290083
	7.59781	4.0888	11.0946	5.67782	9.39271	-0.131883	0.287335
	7.60448	4.08652	11.0956	5.67907	9.39273	-0.137867	0.284822
	7.61115	4.08392	11.0958	5.6802	9.39182	-0.143045	0.282431
	7.61781	4.08082	11.0952	5.68086	9.38987	-0.147577	0.280213
	7.62448	4.07713	11.0936	5.68104	9.38686	-0.15167	0.278173
	7.63115	4.07296	11.0908	5.68068	9.38285	-0.155637	0.276367
	7.63781	4.06819	11.087	5.67973	9.37773	-0.159733	0.27468
	7.64448	4.06297	11.082	5.67812	9.37166	-0.163769	0.273285
	7.65115	4.0573	11.0757	5.67585	9.36461	-0.167612	0.27201
	7.65781	4.05112	11.0681	5.67287	9.35656	-0.170907	0.271043
	7.66448	4.04446	11.0593	5.66918	9.34762	-0.173457	0.270364
	7.67115	4.03745	11.0491	5.66471	9.33766	-0.175178	0.269992
	7.67781	4.03003	11.0376	5.65946	9.32679	-0.176036	0.269977
	7.68448	4.02213	11.0248	5.65344	9.31497	-0.176227	0.270264
	7.69115	4.01388	11.0105	5.64665	9.30208	-0.175764	0.270914
	7.69781	4.00522	10.9948	5.63908	9.28806	-0.174713	0.271909
	7.70448	3.99606	10.9776	5.63067	9.27279	-0.173044	0.273093
	7.71115	3.98644	10.9588	5.62137	9.25631	-0.1709	0.274631
	7.71781	3.9764	10.9384	5.6113	9.23849	-0.168556	0.276345
	7.72448	3.96587	10.9164	5.60027	9.21934	-0.16611	0.278298
	7.73115	3.95494	10.8927	5.58835	9.19875	-0.163715	0.280371
	7.73781	3.94354	10.8674	5.57554	9.17693	-0.161318	0.282681
	7.74448	3.93168	10.8403	5.56183	9.1537	-0.158863	0.28505
	7.75115	3.91938	10.8114	5.54711	9.12922	-0.156119	0.287604
	7.75781	3.90665	10.7808	5.53161	9.1035	-0.153214	0.290271
	7.76448	3.89343	10.7484	5.5151	9.07656	-0.150262	0.29288
	7.77115	3.8798	10.7142	5.49775	9.04843	-0.147284	0.295608
	7.77781	3.86569	10.6783	5.47957	9.01913	-0.144254	0.298273
	7.78448	3.85109	10.6404	5.46044	8.98864	-0.141214	0.300939
	7.79115	3.83608	10.6008	5.44053	8.95695	-0.138145	0.303542
	7.79781	3.82065	10.5593	5.41979	8.92413	-0.134981	0.306022
	7.80448	3.80486	10.5162	5.39821	8.89011	-0.131934	0.308564
	7.81115	3.78873	10.4714	5.37586	8.85501	-0.129108	0.310981
	7.81781	3.77229	10.425	5.3528	8.8188	-0.126473	0.313459
	7.82448	3.7556	10.3772	5.32901	8.7815	-0.123939	0.31594
	7.83115	3.73869	10.328	5.30452	8.7432	-0.121358	0.318545
	7.83781	3.72152	10.2775	5.27936	8.70394	-0.118699	0.321265
	7.84448	3.7042	10.2258	5.25361	8.66389	-0.116299	0.324051
	7.85115	3.68674	10.1731	5.22745	8.62294	-0.114287	0.327078
	7.85781	3.66909	10.1194	5.20062	8.58119	-0.112897	0.330278
	7.86448	3.65121	10.0648	5.17339	8.53877	-0.112101	0.333662
	7.87115	3.63328	10.0095	5.14579	8.49576	-0.11134	0.337288
	7.87781	3.61522	9.9535	5.11783	8.45215	-0.110075	0.341088
	7.88448	3.59705	9.89697	5.08964	8.40813	-0.107955	0.345004
	7.89115	3.57876	9.83995	5.06127	8.36367	-0.105035	0.349045
	7.89781	3.56036	9.78262	5.03266	8.31906	-0.10171	0.35332
	7.90448	3.54204	9.72512	5.00399	8.2744	-0.0985387	0.357586
	7.91115	3.52371	9.66755	4.97532	8.22974	-0.0960383	0.361921
	7.91781	3.50545	9.60999	4.94671	8.18526	-0.0941866	0.366366
	7.92448	3.48711	9.55264	4.91816	8.14091	-0.0926602	0.370757
	7.93115	3.46892	9.49552	4.88961	8.09695	-0.0909109	0.375259
	7.93781	3.45076	9.43882	4.86124	8.05329	-0.0886642	0.379705
	7.94448	3.43265	9.38266	4.83286	8.00996	-0.0855915	0.384334
	7.95115	3.41461	9.32708	4.80461	7.96707	-0.081858	0.388952
	7.95781	3.39668	9.27222	4.77636	7.92466	-0.0777916	0.3937
	7.96448	3.37879	9.21822	4.74828	7.88267	-0.0737394	0.398628
	7.97115	3.36098	9.1651	4.72027	7.84131	-0.0700614	0.40367
	7.97781	3.3434	9.11303	4.69249	7.80065	-0.0669098	0.408718
	7.98448	3.32581	9.06194	4.6649	7.76063	-0.0640781	0.413887
	7.99115	3.30836	9.01204	4.63748	7.72153	-0.0615074	0.419059
	7.99781	3.29108	8.96332	4.61048	7.6834	-0.0588623	0.424292
	8.00448	3.27387	8.91598	4.58384	7.64633	-0.0560835	0.429412
	8.01115	3.25691	8.86996	4.55767	7.61044	-0.053112	0.434525
	8.01781	3.24013	8.82545	4.53186	7.57591	-0.0498778	0.439461
	8.02448	3.22364	8.78247	4.50653	7.54266	-0.0464713	0.444226
	8.03115	3.20734	8.7411	4.48167	7.5108	-0.0430372	0.448866
	8.03781	3.19147	8.70151	4.45729	7.48049	-0.039728	0.453324
	8.04448	3.17594	8.66366	4.43345	7.45158	-0.0366628	0.457608
	8.05115	3.16077	8.62756	4.41009	7.42411	-0.0339873	0.461713
	8.05781	3.14623	8.59339	4.38732	7.39822	-0.0317178	0.465572
	8.06448	3.13219	8.56097	4.36521	7.37378	-0.0296367	0.469072
	8.07115	3.11868	8.53034	4.34375	7.35075	-0.0276707	0.472334
	8.07781	3.10567	8.50139	4.32295	7.3291	-0.0257501	0.475174
	8.08448	3.09329	8.47415	4.30286	7.30884	-0.0238236	0.477659
	8.09115	3.08139	8.44845	4.28349	7.28983	-0.0220527	0.479725
	8.09781	3.06997	8.4243	4.26483	7.27207	-0.0203748	0.481314
	8.10448	3.05902	8.40159	4.24689	7.25544	-0.018597	0.482492
	8.11115	3.04855	8.38024	4.22966	7.23995	-0.0165593	0.483124
	8.11781	3.03844	8.36033	4.21304	7.22553	-0.0143695	0.483233
	8.12448	3.0288	8.34172	4.197	7.21217	-0.0120338	0.482862
	8.13115	3.01959	8.32444	4.18156	7.19987	-0.0098628	0.481842
	8.13781	3.01081	8.30843	4.16672	7.18847	-0.0078411	0.480406
	8.14448	3.00254	8.29352	4.15242	7.17804	-0.0058608	0.47837
	8.15115	2.99465	8.2797	4.13859	7.16836	-0.0037776	0.475742
	8.15781	2.98723	8.26678	4.1253	7.15941	-0.0014726	0.472579
	8.16448	2.98029	8.2547	4.1126	7.1511	0.00079253	0.468931
	8.17115	2.97371	8.24333	4.10044	7.14328	0.00290599	0.464624
	8.17781	2.96753	8.23247	4.08882	7.13582	0.00459371	0.459846
	8.18448	2.96161	8.22201	4.07761	7.12863	0.00593564	0.454646
	8.19115	2.95605	8.21191	4.06694	7.12158	0.00715962	0.448906
	8.19781	2.95077	8.20196	4.05675	7.11458	0.00844104	0.442754
	8.20448	2.94563	8.19211	4.04692	7.10764	0.0100025	0.436302
	8.21115	2.94071	8.18227	4.0375	7.10055	0.0117377	0.429434
	8.21781	2.93586	8.17234	4.02826	7.09323	0.0134828	0.422327
	8.22448	2.93114	8.16223	4.01938	7.08577	0.0151257	0.414862
	8.23115	2.92645	8.1518	4.01068	7.07796	0.0166381	0.407283
	8.23781	2.92171	8.14102	4.00203	7.06971	0.0180846	0.399518
	8.24448	2.91691	8.12977	3.99351	7.06111	0.0197692	0.391581
	8.25115	2.91212	8.11804	3.98505	7.05204	0.0216625	0.383641
	8.25781	2.9072	8.1057	3.97664	7.04244	0.0236009	0.375584
	8.26448	2.9021	8.09265	3.96818	7.03223	0.0254117	0.367708
	8.27115	2.89695	8.07897	3.95977	7.02139	0.0270637	0.359892
	8.27781	2.89177	8.06467	3.95143	7.01001	0.028488	0.352253
	8.28448	2.8865	8.04973	3.9432	6.99801	0.0298401	0.344798
	8.29115	2.88119	8.0341	3.93498	6.98537	0.0311782	0.337641
	8.29781	2.87595	8.01795	3.92693	6.97214	0.0324183	0.330713
	8.30448	2.87076	8.00126	3.91901	6.95837	0.0335224	0.32397
	8.31115	2.86563	7.98409	3.91126	6.94412	0.034607	0.317529
	8.31781	2.86069	7.96646	3.90375	6.92946	0.0358506	0.311379
	8.32448	2.85579	7.94843	3.89642	6.91428	0.0372786	0.30553
	8.33115	2.85108	7.93007	3.88932	6.89879	0.0391185	0.299922
	8.33781	2.84654	7.91146	3.88259	6.8829	0.0412718	0.294613
	8.34448	2.84211	7.89259	3.87615	6.86667	0.0437773	0.289655
	8.35115	2.83779	7.87347	3.86995	6.85014	0.0465094	0.285061
	8.35781	2.83359	7.85423	3.86405	6.83338	0.0493263	0.280827
	8.36448	2.8295	7.83486	3.85851	6.81633	0.0523397	0.277066
	8.37115	2.82542	7.81549	3.8532	6.7992	0.0557323	0.27366
	8.37781	2.82152	7.79626	3.84831	6.78202	0.0595642	0.270668
	8.38448	2.81774	7.77714	3.84372	6.76484	0.0639766	0.267973
	8.39115	2.81407	7.75831	3.83955	6.74782	0.0689788	0.265643
	8.39781	2.81061	7.73983	3.83574	6.73107	0.0744231	0.263722
	8.40448	2.80738	7.72175	3.8324	6.7147	0.0803371	0.261986
	8.41115	2.80434	7.70422	3.82954	6.69878	0.0865131	0.260671
	8.41781	2.8016	7.68718	3.82721	6.68335	0.0928796	0.259645
	8.42448	2.79915	7.67078	3.82543	6.6685	0.0995241	0.258995
	8.43115	2.79701	7.655	3.82417	6.65429	0.106666	0.25875
	8.43781	2.79523	7.63993	3.82352	6.64071	0.1144	0.258808
	8.44448	2.79379	7.62567	3.82346	6.6278	0.122928	0.259406
	8.45115	2.79252	7.61205	3.82388	6.61553	0.132159	0.260291
	8.45781	2.79157	7.5993	3.82483	6.60404	0.141935	0.261483
	8.46448	2.79078	7.58746	3.82626	6.59323	0.152033	0.263085
	8.47115	2.79016	7.57652	3.82805	6.58312	0.162556	0.264806
	8.47781	2.78973	7.56655	3.83031	6.57384	0.173626	0.266704
	8.48448	2.78942	7.5577	3.83294	6.56534	0.185332	0.268723
	8.49115	2.78923	7.54993	3.83586	6.55767	0.197552	0.270681
	8.49781	2.78916	7.54323	3.83902	6.55083	0.2099	0.272638
	8.50448	2.78921	7.53763	3.84241	6.54487	0.221864	0.274546
	8.51115	2.78944	7.53314	3.84599	6.53983	0.233169	0.276385
	8.51781	2.78984	7.52966	3.84969	6.53561	0.244054	0.278054
	8.52448	2.79044	7.52715	3.85344	6.53245	0.25476	0.279718
	8.53115	2.79121	7.52559	3.85725	6.53027	0.265563	0.281146
	8.53781	2.79214	7.52491	3.86107	6.52904	0.276622	0.282459
	8.54448	2.79327	7.52501	3.86488	6.52889	0.287714	0.283584
	8.55115	2.7945	7.52592	3.8687	6.52965	0.298508	0.284416
	8.55781	2.79572	7.52748	3.87245	6.5314	0.308637	0.285133
	8.56448	2.79697	7.5298	3.87615	6.53416	0.317852	0.285664
	8.57115	2.79831	7.53296	3.87996	6.53791	0.326031	0.285903
	8.57781	2.79955	7.5367	3.8836	6.54256	0.33319	0.286029
	8.58448	2.80078	7.54132	3.8873	6.54815	0.339508	0.286035
	8.59115	2.8019	7.54653	3.89093	6.55466	0.345082	0.285918
	8.59781	2.8029	7.55253	3.89451	6.56207	0.349832	0.285622
	8.60448	2.80378	7.5592	3.89802	6.57046	0.353651	0.285152
	8.61115	2.80463	7.56655	3.90148	6.57986	0.356369	0.284559
	8.61781	2.80553	7.5746	3.90488	6.5903	0.357826	0.283721
	8.62448	2.80642	7.5833	3.90822	6.60168	0.358194	0.282581
	8.63115	2.80738	7.59256	3.9115	6.61411	0.357405	0.281092
	8.63781	2.80835	7.60242	3.91471	6.62763	0.355568	0.279411
	8.64448	2.80948	7.61273	3.91787	6.64216	0.352696	0.277258
	8.65115	2.81076	7.62356	3.92097	6.65768	0.348699	0.27481
	8.65781	2.81214	7.6349	3.92407	6.67415	0.343552	0.271994
	8.66448	2.81356	7.64649	3.92711	6.69138	0.337376	0.268831
	8.67115	2.81493	7.65843	3.93003	6.70954	0.330408	0.265493
	8.67781	2.81625	7.67066	3.93295	6.72844	0.323006	0.261921
	8.68448	2.81755	7.6831	3.93587	6.74808	0.315275	0.258347
	8.69115	2.81855	7.69559	3.93867	6.76836	0.307391	0.254594
	8.69781	2.81938	7.70822	3.94148	6.78933	0.299357	0.250905
	8.70448	2.82004	7.72099	3.94434	6.81086	0.291235	0.247275
	8.71115	2.82044	7.73382	3.94732	6.83283	0.283126	0.243763
	8.71781	2.82061	7.74668	3.95024	6.8553	0.274968	0.240374
	8.72448	2.82066	7.75972	3.95334	6.87815	0.266488	0.237212
	8.73115	2.8206	7.77283	3.9565	6.90134	0.257692	0.234113
	8.73781	2.82046	7.7862	3.95977	6.92474	0.248613	0.231253
	8.74448	2.82028	7.7998	3.96317	6.94838	0.239565	0.228563
	8.75115	2.82017	7.81381	3.96675	6.97228	0.230982	0.226057
	8.75781	2.82016	7.8283	3.97056	6.99643	0.223087	0.223838
	8.76448	2.82028	7.84331	3.97456	7.02067	0.215655	0.221737
	8.77115	2.82048	7.85885	3.97873	7.04513	0.208471	0.219879
	8.77781	2.82091	7.87513	3.98332	7.06975	0.201436	0.218318
	8.78448	2.82145	7.89195	3.98815	7.09446	0.194547	0.216995
	8.79115	2.82212	7.90951	3.99333	7.11919	0.187967	0.215974
	8.79781	2.82289	7.92778	3.99888	7.14376	0.181835	0.215371
	8.80448	2.82373	7.94664	4.00472	7.16825	0.176116	0.215135
	8.81115	2.82467	7.96616	4.01092	7.19243	0.170573	0.215376
	8.81781	2.82554	7.98627	4.01741	7.21623	0.165139	0.216092
	8.82448	2.82649	8.00706	4.02415	7.23962	0.159864	0.217298
	8.83115	2.82742	8.02848	4.03118	7.26255	0.154961	0.219158
	8.83781	2.82829	8.0505	4.03851	7.28503	0.150598	0.221485
	8.84448	2.82924	8.0732	4.04602	7.30708	0.146837	0.224357
	8.85115	2.83038	8.09663	4.05395	7.32872	0.143821	0.22776
	8.85781	2.83163	8.12076	4.06212	7.34993	0.141414	0.231572
	8.86448	2.83301	8.14559	4.07064	7.37086	0.139512	0.23575
	8.87115	2.83471	8.17109	4.07952	7.39151	0.137988	0.240339
	8.87781	2.83669	8.19716	4.08876	7.41188	0.136503	0.245219
	8.88448	2.83898	8.22373	4.0983	7.43186	0.135121	0.250283
	8.89115	2.84163	8.25071	4.10825	7.45153	0.133605	0.255589
	8.89781	2.8446	8.27792	4.11844	7.47067	0.132054	0.261069
	8.90448	2.84783	8.30525	4.12887	7.48938	0.130593	0.266728
	8.91115	2.85138	8.33256	4.1396	7.50745	0.129151	0.272451
	8.91781	2.85517	8.3597	4.15045	7.52486	0.127698	0.278292
	8.92448	2.85933	8.38667	4.16148	7.54161	0.126286	0.284194
	8.93115	2.8637	8.41324	4.17262	7.55764	0.124922	0.29009
	8.93781	2.86837	8.43936	4.18395	7.57299	0.124002	0.29593
	8.94448	2.87336	8.46508	4.19539	7.58779	0.123438	0.301648
	8.95115	2.87872	8.49033	4.20713	7.602	0.123182	0.30713
	8.95781	2.88442	8.51516	4.21917	7.61572	0.123128	0.312432
	8.96448	2.89056	8.53959	4.23151	7.62907	0.123115	0.317316
	8.97115	2.89712	8.56375	4.24427	7.64228	0.122983	0.321847
	8.97781	2.90428	8.5876	4.2575	7.65534	0.122816	0.325956
	8.98448	2.91192	8.61127	4.27127	7.66842	0.122732	0.329588
	8.99115	2.92016	8.63491	4.28563	7.68171	0.122789	0.332751
	8.99781	2.92903	8.65849	4.30059	7.69531	0.123057	0.335499
	9.00448	2.93851	8.68211	4.31603	7.70947	0.123526	0.337769
	9.01115	2.94865	8.70584	4.33213	7.7242	0.124099	0.339623
	9.01781	2.95944	8.7298	4.34881	7.73976	0.124702	0.341118
	9.02448	2.97089	8.754	4.3661	7.75615	0.125287	0.34214
	9.03115	2.98293	8.77844	4.38392	7.77355	0.12575	0.342868
	9.03781	2.99556	8.80323	4.40228	7.79191	0.125931	0.343233
	9.04448	3.00868	8.82834	4.42123	7.81132	0.125936	0.343119
	9.05115	3.02234	8.85375	4.44067	7.83167	0.12587	0.342647
	9.05781	3.03638	8.87955	4.46057	7.85304	0.125885	0.341701
	9.06448	3.05075	8.9056	4.4809	7.87515	0.126127	0.340329
	9.07115	3.06524	8.9316	4.5014	7.89789	0.12654	0.338415
	9.07781	3.07986	8.95763	4.52209	7.92116	0.126901	0.336028
	9.08448	3.09443	8.98336	4.54271	7.94469	0.126999	0.333152
	9.09115	3.10885	9.00857	4.56315	7.96823	0.126944	0.329806
	9.09781	3.12293	9.03303	4.58306	7.99158	0.126833	0.326153
	9.10448	3.13653	9.0564	4.60231	8.01441	0.126918	0.322027
	9.11115	3.14952	9.07834	4.62061	8.03641	0.127362	0.317787
	9.11781	3.16179	9.09857	4.63784	8.05722	0.128187	0.31331
	9.12448	3.17312	9.1169	4.65357	8.0767	0.129253	0.308842
	9.13115	3.18359	9.13295	4.66788	8.09438	0.130561	0.304429
	9.13781	3.19283	9.14643	4.6804	8.11003	0.131889	0.300204
	9.14448	3.20106	9.15721	4.69112	8.12341	0.133194	0.296222
	9.15115	3.2079	9.16507	4.69983	8.13425	0.134328	0.292602
	9.15781	3.21345	9.16984	4.7065	8.14242	0.13522	0.289392
	9.16448	3.21762	9.17139	4.71109	8.14772	0.135928	0.286545
	9.17115	3.22031	9.16973	4.71348	8.15008	0.136694	0.284168
	9.17781	3.22164	9.16481	4.71365	8.14959	0.137521	0.282144
	9.18448	3.2214	9.15671	4.71169	8.14619	0.138451	0.280416
	9.19115	3.21974	9.14545	4.7074	8.13988	0.139341	0.278918
	9.19781	3.2165	9.13112	4.70078	8.13078	0.140002	0.277604
	9.20448	3.21186	9.11384	4.69196	8.11904	0.140431	0.276457
	9.21115	3.20576	9.09389	4.68093	8.10466	0.140766	0.275373
	9.21781	3.19835	9.07134	4.6677	8.08793	0.14128	0.274415
	9.22448	3.18974	9.0465	4.6525	8.06896	0.142041	0.273574
	9.23115	3.18007	9.01965	4.63545	8.048	0.143175	0.272857
	9.23781	3.16951	8.99108	4.6168	8.02537	0.14456	0.27226
	9.24448	3.15823	8.96101	4.59665	8.00118	0.146087	0.271847
	9.25115	3.14642	8.92989	4.57531	7.97585	0.147593	0.271554
	9.25781	3.13426	8.898	4.5529	7.94956	0.148873	0.271325
	9.26448	3.12181	8.86554	4.52965	7.92266	0.149834	0.271273
	9.27115	3.10924	8.83275	4.50569	7.89529	0.150483	0.271282
	9.27781	3.09663	8.79997	4.4812	7.86776	0.150759	0.271292
	9.28448	3.08413	8.76738	4.45646	7.84022	0.150979	0.271351
	9.29115	3.07169	8.73499	4.43143	7.8127	0.151356	0.271296
	9.29781	3.05936	8.70287	4.40633	7.78535	0.152036	0.271296
	9.30448	3.04708	8.67106	4.38124	7.75814	0.152896	0.271171
	9.31115	3.03494	8.63955	4.35627	7.73112	0.153721	0.270863
	9.31781	3.02291	8.60815	4.33153	7.70413	0.154236	0.270438
	9.32448	3.01097	8.57683	4.30703	7.67702	0.154317	0.269894
	9.33115	2.99906	8.54538	4.28277	7.64983	0.154001	0.269105
	9.33781	2.98731	8.51366	4.25887	7.62225	0.153413	0.268089
	9.34448	2.97557	8.48153	4.23509	7.59412	0.152765	0.266894
	9.35115	2.96387	8.44884	4.21154	7.56529	0.152148	0.265459
	9.35781	2.95219	8.41535	4.18812	7.53563	0.151558	0.263794
	9.36448	2.94053	8.38094	4.16481	7.50511	0.151175	0.262011
	9.37115	2.92878	8.34545	4.14157	7.47336	0.151042	0.260113
	9.37781	2.91686	8.30868	4.11826	7.44049	0.151115	0.258278
	9.38448	2.90484	8.27051	4.09496	7.40633	0.1513	0.256497
	9.39115	2.89261	8.2308	4.07171	7.37082	0.15145	0.254774
	9.39781	2.88009	8.1893	4.04835	7.33398	0.15148	0.25317
	9.40448	2.86728	8.14609	4.02504	7.29578	0.151439	0.251684
	9.41115	2.85417	8.10109	4.00174	7.2562	0.151353	0.250426
	9.41781	2.84081	8.05423	3.97855	7.21534	0.151172	0.249296
	9.42448	2.82708	8.0055	3.95542	7.17309	0.151102	0.24846
	9.43115	2.81313	7.95513	3.93242	7.12964	0.150983	0.247865
	9.43781	2.79906	7.90315	3.90953	7.08505	0.150874	0.247689
	9.44448	2.78489	7.84978	3.88694	7.03938	0.150852	0.24787
	9.45115	2.77069	7.79521	3.86459	6.99272	0.150689	0.248651
	9.45781	2.75646	7.73958	3.84235	6.94524	0.150391	0.249968
	9.46448	2.7424	7.68314	3.82054	6.89713	0.14978	0.252119
	9.47115	2.72847	7.62607	3.79896	6.84851	0.149093	0.255106
	9.47781	2.71472	7.56864	3.77774	6.79962	0.148494	0.259103
	9.48448	2.70127	7.51103	3.75682	6.75061	0.148173	0.264225
	9.49115	2.68798	7.45334	3.73626	6.70156	0.148114	0.270537
	9.49781	2.67493	7.3957	3.71593	6.65274	0.148261	0.27828
	9.50448	2.66205	7.3383	3.69596	6.60422	0.14855	0.287573
	9.51115	2.64941	7.28125	3.67635	6.55621	0.14879	0.298592
	9.51781	2.63699	7.22464	3.65698	6.50868	0.148968	0.311453
	9.52448	2.62469	7.16859	3.63791	6.46186	0.149047	0.32635
	9.53115	2.61269	7.11329	3.61925	6.41576	0.148931	0.343513
	9.53781	2.60087	7.05891	3.6009	6.37055	0.148579	0.36312
	9.54448	2.5894	7.00563	3.58295	6.32618	0.147974	0.385233
	9.55115	2.57819	6.95359	3.56543	6.28296	0.147345	0.409973
	9.55781	2.56746	6.90298	3.54838	6.24087	0.146942	0.437513
	9.56448	2.55716	6.85395	3.53193	6.20003	0.146744	0.467854
	9.57115	2.54744	6.80662	3.51614	6.1605	0.146774	0.500942
	9.57781	2.53822	6.761	3.50094	6.12231	0.146876	0.536765
	9.58448	2.52966	6.71729	3.48651	6.08553	0.146902	0.575157
	9.59115	2.52167	6.67532	3.47269	6.05005	0.146931	0.616175
	9.59781	2.51425	6.63519	3.45957	6.01598	0.147014	0.659568
	9.60448	2.50745	6.59691	3.44718	5.98334	0.1472	0.70505
	9.61115	2.50119	6.56038	3.43525	5.95202	0.147392	0.752558
	9.61781	2.4956	6.52571	3.42399	5.92212	0.147448	0.801671
	9.62448	2.49052	6.49278	3.41326	5.89357	0.147228	0.852216
	9.63115	2.486	6.46175	3.40295	5.86644	0.146837	0.903953
	9.63781	2.48218	6.43264	3.39323	5.84077	0.146471	0.956585
	9.64448	2.4789	6.40541	3.38393	5.8166	0.146343	1.00987
	9.65115	2.47647	6.38016	3.37523	5.79405	0.146523	1.06351
	9.65781	2.47482	6.35695	3.36707	5.77299	0.146928	1.11733
	9.66448	2.47398	6.33566	3.35956	5.75361	0.147226	1.17104
	9.67115	2.474	6.31633	3.35258	5.73581	0.147399	1.22458
	9.67781	2.47497	6.29906	3.34638	5.71966	0.147406	1.27769
	9.68448	2.47688	6.28363	3.34078	5.70516	0.147549	1.33027
	9.69115	2.47981	6.27018	3.33595	5.69224	0.148002	1.38231
	9.69781	2.48373	6.25853	3.33184	5.68087	0.148955	1.43363
	9.70448	2.48862	6.24869	3.32832	5.67097	0.150246	1.48436
	9.71115	2.49451	6.24063	3.32546	5.66259	0.151546	1.5346
	9.71781	2.50135	6.23429	3.32332	5.65564	0.152627	1.58436
	9.72448	2.5092	6.22962	3.32171	5.65	0.153296	1.63394
	9.73115	2.5179	6.22656	3.32081	5.64573	0.153561	1.68346
	9.73781	2.52747	6.22496	3.32052	5.64261	0.153719	1.73339
	9.74448	2.53783	6.22489	3.32081	5.6407	0.15385	1.78398
	9.75115	2.54897	6.22625	3.32189	5.64	0.154133	1.83565
	9.75781	2.56077	6.22887	3.32355	5.6403	0.154491	1.88893
	9.76448	2.57315	6.23272	3.32594	5.64169	0.154792	1.94406
	9.77115	2.58603	6.23774	3.32898	5.644	0.155016	2.00164
	9.77781	2.59938	6.2438	3.33273	5.64717	0.155052	2.0619
	9.78448	2.61304	6.25081	3.33703	5.65111	0.155081	2.12509
	9.79115	2.62713	6.25883	3.34203	5.65593	0.154986	2.19156
	9.79781	2.6415	6.26766	3.34769	5.66144	0.154746	2.2613
	9.80448	2.65613	6.27742	3.35395	5.66761	0.154411	2.33427
	9.81115	2.67099	6.288	3.36087	5.67438	0.154136	2.41051
	9.81781	2.68597	6.29948	3.3685	5.68173	0.154043	2.48961
	9.82448	2.70113	6.31185	3.37684	5.68952	0.154136	2.57133
	9.83115	2.71634	6.32516	3.38596	5.69784	0.154195	2.6552
	9.83781	2.73167	6.33943	3.39592	5.70665	0.154038	2.74068
	9.84448	2.74712	6.35488	3.40682	5.71596	0.15348	2.82692
	9.85115	2.76272	6.37142	3.41874	5.72562	0.152829	2.91335
	9.85781	2.77852	6.38933	3.43174	5.73592	0.152337	2.99899
	9.86448	2.79478	6.40867	3.44604	5.74676	0.15209	3.08309
	9.87115	2.81145	6.42968	3.46166	5.75834	0.151891	3.16456
	9.87781	2.8289	6.45249	3.47877	5.77076	0.151421	3.24252
	9.88448	2.84731	6.47744	3.49754	5.78419	0.150572	3.31606
	9.89115	2.86684	6.50483	3.51822	5.79887	0.14957	3.38412
	9.89781	2.88793	6.53497	3.54105	5.81499	0.148753	3.44593
	9.90448	2.91063	6.56808	3.56609	5.83276	0.148443	3.50064
	9.91115	2.93536	6.60456	3.59362	5.85237	0.148507	3.5475
	9.91781	2.96223	6.64472	3.6239	5.87404	0.148826	3.58582
	9.92448	2.99148	6.68874	3.65698	5.89777	0.148981	3.61497
	9.93115	3.02325	6.73678	3.69298	5.92387	0.148829	3.63464
	9.93781	3.05764	6.78912	3.73209	5.95237	0.148406	3.6443
	9.94448	3.0947	6.84571	3.77429	5.98332	0.147809	3.64394
	9.95115	3.13441	6.90653	3.81953	6.01668	0.147166	3.63334
	9.95781	3.17691	6.97162	3.86781	6.05256	0.146674	3.61266
	9.96448	3.22197	7.04064	3.91895	6.09083	0.146445	3.58202
	9.97115	3.26942	7.11348	3.97277	6.13142	0.146439	3.54173
	9.97781	3.31907	7.18979	4.0291	6.17419	0.146633	3.49227
	9.98448	3.37065	7.26915	4.08757	6.219	0.147026	3.43409
	9.99115	3.42388	7.35116	4.14795	6.2656	0.147286	3.36794
	9.99781	3.47831	7.43517	4.20976	6.3138	0.147332	3.2945
	10.0045	3.53357	7.52065	4.27258	6.36317	0.146937	3.21433
	10.0111	3.58905	7.60688	4.33588	6.41326	0.146169	3.12839
	10.0178	3.64417	7.69298	4.39906	6.46358	0.145214	3.03749
	10.0245	3.69847	7.77827	4.46153	6.51377	0.144365	2.94229
	10.0311	3.75133	7.86194	4.52274	6.56321	0.143911	2.84359
	10.0378	3.80215	7.94304	4.58211	6.61138	0.143688	2.74238
	10.0445	3.85037	8.02088	4.63885	6.65782	0.143677	2.6392
	10.0511	3.89548	8.09465	4.69255	6.70187	0.143577	2.53494
	10.0578	3.93674	8.16351	4.7425	6.74322	0.143304	2.43009
	10.0645	3.97392	8.22679	4.78834	6.78121	0.142886	2.32554
	10.0711	4.00635	8.28385	4.82947	6.81546	0.142431	2.22182
	10.0778	4.03378	8.3341	4.86553	6.84563	0.141963	2.11954
	10.0845	4.05583	8.37695	4.89622	6.87137	0.14149	2.01922
	10.0911	4.07228	8.41208	4.92114	6.8925	0.140996	1.92147
	10.0978	4.08315	8.43923	4.94015	6.90883	0.140503	1.82659
	10.1045	4.08827	8.45804	4.95321	6.92005	0.139981	1.73504
	10.1111	4.08762	8.46843	4.96	6.92628	0.139596	1.64701
	10.1178	4.08125	8.4704	4.96078	6.92748	0.139361	1.56286
	10.1245	4.06938	8.46414	4.95541	6.9236	0.139158	1.4827
	10.1311	4.05216	8.44978	4.94415	6.91484	0.138997	1.40664
	10.1378	4.02981	8.42761	4.92716	6.90144	0.138739	1.33476
	10.1445	4.00262	8.39802	4.90481	6.88339	0.138469	1.26699
	10.1511	3.9709	8.36148	4.87733	6.8611	0.138194	1.20332
	10.1578	3.93508	8.31861	4.84526	6.8349	0.137994	1.14365
	10.1645	3.8956	8.26983	4.80902	6.80493	0.137751	1.08791
	10.1711	3.8528	8.21589	4.76903	6.7718	0.137487	1.03599
	10.1778	3.80731	8.15738	4.72593	6.73573	0.137177	0.9877
	10.1845	3.75936	8.09494	4.6801	6.69711	0.136968	0.942813
	10.1911	3.70965	8.02937	4.63206	6.65653	0.136904	0.901266
	10.1978	3.65862	7.96123	4.58241	6.61428	0.13701	0.862819
	10.2045	3.60658	7.89125	4.53144	6.57083	0.137217	0.827349
	10.2111	3.554	7.82	4.47971	6.52657	0.137298	0.794568
	10.2178	3.50124	7.74811	4.42755	6.48179	0.137154	0.764351
	10.2245	3.44869	7.67613	4.37534	6.43696	0.136861	0.736519
	10.2311	3.39671	7.60466	4.32354	6.39234	0.13657	0.710831
	10.2378	3.34543	7.53399	4.27222	6.34812	0.136535	0.687056
	10.2445	3.29513	7.46469	4.2218	6.30466	0.136934	0.665128
	10.2511	3.24619	7.39714	4.17256	6.26212	0.137614	0.644622
	10.2578	3.19874	7.33157	4.1247	6.22076	0.138379	0.62537
	10.2645	3.15284	7.26826	4.07833	6.18066	0.138995	0.607131
	10.2711	3.10872	7.20739	4.03368	6.14197	0.139395	0.589727
	10.2778	3.06647	7.14916	3.99083	6.1049	0.139465	0.572975
	10.2845	3.02617	7.09367	3.94988	6.06956	0.139275	0.556577
	10.2911	2.98784	7.04097	3.91096	6.03585	0.138874	0.54042
	10.2978	2.95146	6.99098	3.87406	6.00391	0.138287	0.524439
	10.3045	2.91702	6.94373	3.83908	5.97379	0.137596	0.508523
	10.3111	2.88466	6.89933	3.80629	5.94554	0.137044	0.492604
	10.3178	2.85421	6.85769	3.77548	5.91917	0.136801	0.476571
	10.3245	2.82572	6.81871	3.74675	5.89462	0.137166	0.460542
	10.3311	2.79908	6.78235	3.71999	5.87179	0.138014	0.444447
	10.3378	2.77416	6.74856	3.69513	5.85075	0.139006	0.428297
	10.3445	2.75092	6.71727	3.67218	5.83132	0.139934	0.412092
	10.3511	2.72933	6.68834	3.65102	5.81358	0.140457	0.395941
	10.3578	2.70924	6.66182	3.63153	5.79743	0.140566	0.379727
	10.3645	2.69069	6.63752	3.61377	5.78275	0.140577	0.363639
	10.3711	2.67344	6.61538	3.5975	5.76959	0.140598	0.347665
	10.3778	2.65764	6.59539	3.58272	5.75799	0.14094	0.331862
	10.3845	2.64314	6.57754	3.56948	5.74782	0.141407	0.316184
	10.3911	2.62996	6.5618	3.55768	5.73929	0.141889	0.300806
	10.3978	2.61816	6.54815	3.54731	5.73231	0.142113	0.285786
	10.4045	2.60761	6.53666	3.53837	5.72692	0.141933	0.271123
	10.4111	2.5984	6.52734	3.5308	5.72324	0.141321	0.256936
	10.4178	2.59055	6.52022	3.52472	5.7212	0.140516	0.243231
	10.4245	2.58395	6.51529	3.51989	5.7207	0.139659	0.230061
	10.4311	2.57866	6.51247	3.51644	5.72191	0.139135	0.217425
	10.4378	2.57463	6.51191	3.51429	5.72481	0.139082	0.205325
	10.4445	2.57184	6.51354	3.5134	5.72933	0.139625	0.193882
	10.4511	2.57036	6.5173	3.51369	5.73548	0.140539	0.183027
	10.4578	2.56993	6.52318	3.51524	5.74324	0.141578	0.172647
	10.4645	2.57058	6.53117	3.51781	5.75267	0.14244	0.162983
	10.4711	2.57235	6.5412	3.52156	5.76367	0.14285	0.153795
	10.4778	2.57509	6.55336	3.52633	5.77637	0.142817	0.145326
	10.4845	2.57871	6.56751	3.53223	5.79066	0.142465	0.137454
	10.4911	2.58315	6.58362	3.53909	5.80652	0.142133	0.130291
	10.4978	2.5884	6.60169	3.54689	5.82394	0.141981	0.123669
	10.5045	2.59434	6.62162	3.55572	5.84281	0.142144	0.117771
	10.5111	2.60083	6.64324	3.56537	5.86295	0.14248	0.11252
	10.5178	2.60792	6.66649	3.57592	5.88435	0.142817	0.107933
	10.5245	2.6156	6.69121	3.58731	5.90684	0.142943	0.103995
	10.5311	2.62365	6.71725	3.59946	5.93021	0.142753	0.100532
	10.5378	2.63216	6.74441	3.61228	5.95436	0.142362	0.0977288
	10.5445	2.64104	6.77268	3.62569	5.97908	0.141981	0.0954578
	10.5511	2.65022	6.80181	3.6397	6.00426	0.141969	0.0936024
	10.5578	2.65957	6.83167	3.65412	6.0297	0.142358	0.0922345
	10.5645	2.66911	6.86219	3.66896	6.05527	0.143076	0.0913389
	10.5711	2.67871	6.89324	3.68404	6.08085	0.144012	0.0907432
	10.5778	2.68824	6.92458	3.69936	6.10621	0.144824	0.0905676
	10.5845	2.69763	6.95602	3.71474	6.13119	0.145426	0.0906889
	10.5911	2.70676	6.98745	3.73006	6.15585	0.145884	0.0911723
	10.5978	2.71576	7.01867	3.7455	6.17983	0.146209	0.0918928
	10.6045	2.7244	7.04948	3.76076	6.2032	0.1464	0.092793
	10.6111	2.73262	7.07963	3.77589	6.22572	0.146498	0.0939888
	10.6178	2.7405	7.10904	3.7908	6.24734	0.146359	0.0952941
	10.6245	2.74795	7.13741	3.80558	6.2679	0.146004	0.0966074
	10.6311	2.75494	7.16469	3.81994	6.28735	0.145633	0.098039
	10.6378	2.76145	7.19075	3.83401	6.30559	0.145382	0.0994007
	10.6445	2.7673	7.21538	3.84748	6.32237	0.145458	0.100595
	10.6511	2.77256	7.23853	3.86035	6.33774	0.145737	0.101731
	10.6578	2.77709	7.25999	3.87251	6.3515	0.146218	0.102623
	10.6645	2.7808	7.27969	3.88378	6.36359	0.146622	0.103163
	10.6711	2.78383	7.29749	3.89403	6.37392	0.146999	0.103408
	10.6778	2.78592	7.31324	3.90315	6.38248	0.147466	0.103176
	10.6845	2.78717	7.32682	3.9112	6.38918	0.147868	0.102582
	10.6911	2.78752	7.33802	3.91793	6.39401	0.14817	0.101448
	10.6978	2.78699	7.34684	3.92342	6.39693	0.148297	0.0998429
	10.7045	2.78556	7.3531	3.92765	6.398	0.148194	0.0978193
	10.7111	2.78329	7.35679	3.93057	6.39716	0.147928	0.0953747
	10.7178	2.78019	7.35775	3.93218	6.39443	0.14771	0.092514
	10.7245	2.77614	7.35607	3.93248	6.38977	0.147796	0.0892948
	10.7311	2.7712	7.35163	3.9314	6.38326	0.148137	0.0857202
	10.7378	2.76541	7.34446	3.92902	6.37481	0.148682	0.0818396
	10.7445	2.75862	7.33446	3.9252	6.36454	0.149271	0.0775535
	10.7511	2.751	7.32165	3.92002	6.35238	0.14965	0.0730891
	10.7578	2.74247	7.30603	3.9134	6.33831	0.149756	0.0682625
	10.7645	2.73306	7.28757	3.9053	6.32243	0.149555	0.0632628
	10.7711	2.72289	7.26638	3.89582	6.30472	0.149093	0.0580214
	10.7778	2.71186	7.24235	3.88485	6.28516	0.148497	0.0526085
	10.7845	2.70002	7.21562	3.87245	6.26377	0.147779	0.047128
	10.7911	2.68747	7.18635	3.85869	6.24073	0.147165	0.0415322
	10.7978	2.67437	7.1546	3.84361	6.21591	0.146633	0.0359942
	10.8045	2.66051	7.12043	3.82721	6.18946	0.146268	0.0303939
	10.8111	2.64617	7.08406	3.80975	6.16147	0.14603	0.0249134
	10.8178	2.63123	7.04559	3.79115	6.13196	0.145945	0.0194299
	10.8245	2.61573	7.00505	3.7716	6.10095	0.145875	0.0140617
	10.8311	2.59978	6.96265	3.7511	6.06867	0.145801	0.00881318
	10.8378	2.58346	6.91856	3.72988	6.03512	0.145681	0.00362941
	10.8445	2.56682	6.87272	3.70795	6.00042	0.145653	-0.0014411
	10.8511	2.54985	6.82547	3.6853	5.96476	0.145751	-0.006392
	10.8578	2.53268	6.77684	3.66217	5.9281	0.146025	-0.011216
	10.8645	2.51541	6.72709	3.63857	5.89065	0.146401	-0.0157994
	10.8711	2.49807	6.67631	3.61449	5.8525	0.146838	-0.0201458
	10.8778	2.48067	6.62477	3.59005	5.81374	0.147154	-0.02425
	10.8845	2.46328	6.57269	3.56537	5.7745	0.14728	-0.0279919
	10.8911	2.44601	6.52027	3.54046	5.73491	0.14727	-0.0313836
	10.8978	2.42878	6.46763	3.51542	5.69496	0.147185	-0.0344705
	10.9045	2.41164	6.41499	3.49027	5.65487	0.147051	-0.0370196
	10.9111	2.39466	6.36254	3.46529	5.61475	0.14702	-0.0392108
	10.9178	2.3778	6.31042	3.44038	5.57466	0.147199	-0.0409244
	10.9245	2.36119	6.25883	3.4157	5.53476	0.147742	-0.0422869
	10.9311	2.34482	6.20778	3.39133	5.49519	0.148705	-0.043222
	10.9378	2.32876	6.15742	3.3673	5.45603	0.149933	-0.0436781
	10.9445	2.31313	6.10784	3.34376	5.4174	0.151162	-0.043783
	10.9511	2.29785	6.05915	3.32063	5.37943	0.152141	-0.0434624
	10.9578	2.28298	6.01135	3.29804	5.34217	0.152811	-0.0426733
	10.9645	2.26849	5.96453	3.27593	5.30568	0.153156	-0.0416421
	10.9711	2.25446	5.91863	3.25441	5.26999	0.15343	-0.0401343
	10.9778	2.24079	5.8737	3.23331	5.2351	0.153743	-0.0383371
	10.9845	2.22755	5.82985	3.21275	5.20119	0.154301	-0.0361782
	10.9911	2.21464	5.78705	3.19266	5.16801	0.155234	-0.0337887
	10.9978	2.20203	5.74524	3.17299	5.13572	0.156573	-0.0312891
	11.0045	2.18973	5.70454	3.15368	5.10425	0.158183	-0.0286565
	11.0111	2.17784	5.66495	3.13479	5.07357	0.159871	-0.0258549
	11.0178	2.16613	5.62638	3.11619	5.0437	0.161323	-0.0229924
	11.0245	2.15479	5.58904	3.09801	5.01465	0.162243	-0.0200566
	11.0311	2.14387	5.55281	3.08019	4.98639	0.16273	-0.0169524
	11.0378	2.13319	5.51768	3.06267	4.95898	0.162995	-0.0137786
	11.0445	2.12295	5.48371	3.04568	4.93248	0.163275	-0.0104755
	11.0511	2.11311	5.45083	3.02917	4.90676	0.163871	-0.006939
	11.0578	2.10364	5.41907	3.01307	4.88202	0.164816	-0.0033327
	11.0645	2.09465	5.38837	2.99764	4.8582	0.165902	0.00045315
	11.0711	2.08608	5.3587	2.98268	4.83536	0.167005	0.00435738
	11.0778	2.07811	5.33021	2.96837	4.81346	0.168054	0.00826714
	11.0845	2.07065	5.30276	2.95466	4.79251	0.168885	0.0122304
	11.0911	2.06368	5.27635	2.94137	4.77256	0.169438	0.0161348
	11.0978	2.0573	5.25111	2.92867	4.75347	0.169851	0.0199259
	11.1045	2.05151	5.22706	2.9164	4.73532	0.170156	0.0235889
	11.1111	2.04638	5.20415	2.90465	4.71802	0.170487	0.0271256
	11.1178	2.04183	5.1824	2.89333	4.70156	0.17083	0.030371
	11.1245	2.03783	5.16181	2.88242	4.68593	0.171153	0.0334958
	11.1311	2.03453	5.14244	2.87193	4.67114	0.171321	0.0363187
	11.1378	2.03185	5.12431	2.86192	4.65721	0.171253	0.0389046
	11.1445	2.02993	5.10739	2.85244	4.64415	0.170968	0.0411904
	11.1511	2.02867	5.0917	2.84344	4.63201	0.170485	0.0431257
	11.1578	2.02813	5.07724	2.83509	4.62075	0.169782	0.0446953
	11.1645	2.02829	5.06396	2.82723	4.61029	0.168908	0.0457919
	11.1711	2.02918	5.05178	2.8199	4.6008	0.167936	0.0464698
	11.1778	2.03083	5.04076	2.8131	4.59208	0.166941	0.0466072
	11.1845	2.03315	5.03086	2.80678	4.5843	0.166154	0.0461543
	11.1911	2.0363	5.02211	2.80112	4.57726	0.165679	0.0452209
	11.1978	2.04023	5.0144	2.79582	4.57108	0.165491	0.0437415
	11.2045	2.04499	5.00776	2.79111	4.56563	0.165378	0.041734
	11.2111	2.05055	5.00216	2.78687	4.56097	0.165184	0.0393666
	11.2178	2.05706	4.99763	2.78324	4.55706	0.164855	0.0365169
	11.2245	2.06433	4.99411	2.78002	4.55386	0.16446	0.0333215
	11.2311	2.07244	4.99141	2.77734	4.5513	0.164097	0.0299982
	11.2378	2.08128	4.98964	2.77513	4.54946	0.163857	0.0263186
	11.2445	2.09094	4.98866	2.7734	4.54812	0.163565	0.0225889
	11.2511	2.10126	4.98837	2.77203	4.54741	0.163129	0.0187314
	11.2578	2.11216	4.9887	2.77114	4.54712	0.162413	0.0147613
	11.2645	2.12353	4.98943	2.77054	4.54714	0.161394	0.0107347
	11.2711	2.13533	4.99066	2.77025	4.54761	0.160244	0.00658251
	11.2778	2.1474	4.99226	2.7703	4.54829	0.159136	0.00237756
	11.2845	2.15965	4.99411	2.77048	4.54917	0.158168	-0.0017705
	11.2911	2.17198	4.99633	2.7709	4.55025	0.157597	-0.0059771
	11.2978	2.18434	4.99876	2.7715	4.55152	0.1575	-0.0101227
	11.3045	2.1966	5.0015	2.77221	4.55294	0.157706	-0.0141585
	11.3111	2.20868	5.00449	2.77305	4.55449	0.158017	-0.0181917
	11.3178	2.22058	5.00778	2.77406	4.55616	0.158236	-0.0219846
	11.3245	2.23218	5.0113	2.77513	4.558	0.158026	-0.0256118
	11.3311	2.24349	5.01508	2.77638	4.55995	0.157635	-0.0290614
	11.3378	2.25456	5.01915	2.77781	4.56204	0.157176	-0.0323265
	11.3445	2.26521	5.02338	2.77936	4.56417	0.156903	-0.0353595
	11.3511	2.27557	5.02776	2.78115	4.56654	0.156948	-0.0382123
	11.3578	2.28551	5.03242	2.78318	4.56904	0.157432	-0.0407035
	11.3645	2.29508	5.0372	2.78544	4.57166	0.158235	-0.0428988
	11.3711	2.3043	5.04209	2.78801	4.5744	0.159203	-0.0446722
	11.3778	2.31305	5.04723	2.79087	4.57733	0.160216	-0.0460269
	11.3845	2.32142	5.05252	2.79403	4.58026	0.16113	-0.0469
	11.3911	2.32926	5.05795	2.79748	4.58337	0.161951	-0.0472387
	11.3978	2.33673	5.06358	2.8013	4.58656	0.162618	-0.0471003
	11.4045	2.34374	5.06942	2.80535	4.58984	0.163245	-0.0463618
	11.4111	2.35039	5.07549	2.80976	4.59326	0.163767	-0.0450882
	11.4178	2.35673	5.0818	2.81453	4.59685	0.164114	-0.0432768
	11.4245	2.36283	5.08834	2.8196	4.60056	0.164224	-0.0409927
	11.4311	2.36883	5.09507	2.82514	4.60455	0.164126	-0.0382944
	11.4378	2.37489	5.10212	2.83116	4.60879	0.164086	-0.0352375
	11.4445	2.38106	5.10937	2.83778	4.61321	0.164154	-0.0318836
	11.4511	2.38742	5.11685	2.84499	4.61795	0.164331	-0.028288
	11.4578	2.39419	5.12448	2.85286	4.62287	0.164563	-0.0244662
	11.4645	2.4013	5.13226	2.86138	4.628	0.164557	-0.020635
	11.4711	2.40893	5.14022	2.87056	4.63329	0.164333	-0.0165667
	11.4778	2.417	5.1483	2.88051	4.6387	0.164124	-0.0125713
	11.4845	2.42548	5.15644	2.89094	4.64408	0.164151	-0.0086862
	11.4911	2.43433	5.16464	2.90197	4.6495	0.16444	-0.0048646
	11.4978	2.4435	5.17275	2.91342	4.6548	0.164803	-0.0011587
	11.5045	2.45281	5.1807	2.9251	4.66003	0.164997	0.00230152
	11.5111	2.46223	5.18849	2.93708	4.66506	0.164872	0.00552769
	11.5178	2.47158	5.19594	2.94906	4.66983	0.164511	0.00851115
	11.5245	2.4808	5.203	2.96098	4.67428	0.164072	0.011144
	11.5311	2.48961	5.20948	2.97272	4.67839	0.163685	0.0135389
	11.5378	2.49813	5.21537	2.98423	4.68212	0.163433	0.0156361
	11.5445	2.5061	5.22052	2.99531	4.68528	0.163226	0.0174393
	11.5511	2.51338	5.22495	3.00586	4.68794	0.162921	0.0189999
	11.5578	2.51994	5.22853	3.01582	4.69003	0.162395	0.02026
	11.5645	2.52554	5.23122	3.025	4.69149	0.161705	0.0211584
	11.5711	2.53017	5.23296	3.03328	4.69232	0.160833	0.0217026
	11.5778	2.5336	5.23384	3.04073	4.69246	0.159863	0.0219391
	11.5845	2.53578	5.2336	3.04717	4.69185	0.158826	0.0216976
	11.5911	2.53647	5.23236	3.05247	4.69054	0.157702	0.0210411
	11.5978	2.53568	5.22998	3.05659	4.68839	0.156472	0.0199564
	11.6045	2.53327	5.22636	3.05945	4.68547	0.155345	0.0184626
	11.6111	2.52913	5.22152	3.061	4.68163	0.154462	0.0166109
	11.6178	2.52319	5.21535	3.06118	4.67685	0.153899	0.0142873
	11.6245	2.51538	5.20766	3.0598	4.67112	0.153375	0.011787
	11.6311	2.50574	5.19845	3.05688	4.66438	0.152694	0.00892812
	11.6378	2.49434	5.18781	3.05253	4.65661	0.151707	0.00589486
	11.6445	2.48116	5.17546	3.04645	4.64778	0.150404	0.00262166
	11.6511	2.46637	5.16167	3.03888	4.63797	0.14912	-0.0007691
	11.6578	2.45003	5.14629	3.02976	4.62724	0.148071	-0.0042842
	11.6645	2.43245	5.12948	3.01915	4.6155	0.147472	-0.0079774
	11.6711	2.41373	5.11124	3.00711	4.60286	0.14724	-0.0116058
	11.6778	2.39401	5.09164	2.99382	4.58935	0.147152	-0.0151808
	11.6845	2.37353	5.07089	2.9794	4.57502	0.146991	-0.0187543
	11.6911	2.35244	5.0489	2.96402	4.55994	0.146572	-0.0221458
	11.6978	2.33087	5.02579	2.94769	4.544	0.145771	-0.0254173
	11.7045	2.30895	5.00173	2.93058	4.52741	0.144836	-0.028397
	11.7111	2.28685	4.97679	2.913	4.51017	0.143886	-0.031192
	11.7178	2.26473	4.95102	2.89494	4.49225	0.143066	-0.0336253
	11.7245	2.24261	4.92455	2.87658	4.47377	0.14232	-0.0358304
	11.7311	2.22074	4.89749	2.8581	4.45482	0.141679	-0.037734
	11.7378	2.19928	4.86996	2.83951	4.43551	0.141079	-0.0393404
	11.7445	2.17829	4.84204	2.82103	4.4158	0.140668	-0.0406521
	11.7511	2.15797	4.81385	2.80261	4.39586	0.140622	-0.0417857
	11.7578	2.13843	4.78551	2.78443	4.37582	0.140926	-0.0426151
	11.7645	2.11972	4.75715	2.76661	4.35574	0.141559	-0.043093
	11.7711	2.1019	4.72871	2.74909	4.33558	0.142278	-0.0434547
	11.7778	2.08504	4.70042	2.73192	4.3156	0.142753	-0.0435716
	11.7845	2.06907	4.67235	2.71517	4.29563	0.1429	-0.0435171
	11.7911	2.05399	4.64458	2.69884	4.27585	0.142654	-0.0433386
	11.7978	2.03968	4.61708	2.68298	4.25625	0.142169	-0.0429901
	11.8045	2.02615	4.59008	2.66761	4.23689	0.141618	-0.0426916
	11.8111	2.01325	4.56357	2.6527	4.21774	0.141003	-0.0422796
	11.8178	2.00097	4.53758	2.63828	4.1989	0.140465	-0.0419822
	11.8245	1.9892	4.51233	2.62439	4.18041	0.14009	-0.0416292
	11.8311	1.97793	4.48776	2.61104	4.16228	0.139894	-0.0413929
	11.8378	1.96714	4.46403	2.59829	4.14467	0.139948	-0.0412131
	11.8445	1.9568	4.44098	2.58607	4.12751	0.140225	-0.0410985
	11.8511	1.94692	4.41889	2.57438	4.11092	0.140637	-0.0410963
	11.8578	1.93749	4.39766	2.5633	4.09503	0.140938	-0.0411602
	11.8645	1.9285	4.37735	2.55263	4.07969	0.141042	-0.0414019
	11.8711	1.91992	4.3579	2.54261	4.06505	0.140859	-0.0417576
	11.8778	1.91162	4.33929	2.53296	4.05097	0.140485	-0.0421792
	11.8845	1.90365	4.32162	2.52366	4.03755	0.140301	-0.0427781
	11.8911	1.89595	4.30479	2.51484	4.02475	0.14041	-0.0434927
	11.8978	1.88832	4.28871	2.50626	4.0125	0.140928	-0.0442674
	11.9045	1.88101	4.27354	2.49803	4.00087	0.141707	-0.0451628
	11.9111	1.87374	4.25912	2.4901	3.98973	0.142552	-0.0461706
	11.9178	1.86652	4.24534	2.48235	3.97899	0.143365	-0.0471863
	11.9245	1.85939	4.23233	2.47478	3.96864	0.144067	-0.0483771
	11.9311	1.85237	4.22001	2.46757	3.95869	0.144515	-0.0496287
	11.9378	1.84533	4.20825	2.46054	3.94897	0.144669	-0.0510043
	11.9445	1.83831	4.19707	2.45374	3.93941	0.144377	-0.0524315
	11.9511	1.8314	4.18635	2.44719	3.93012	0.143593	-0.0540495
	11.9578	1.82454	4.17603	2.44081	3.92087	0.142458	-0.0557829
	11.9645	1.8177	4.1661	2.43467	3.91191	0.141201	-0.0576928
	11.9711	1.81091	4.1564	2.42877	3.90311	0.140077	-0.0596629
	11.9778	1.80422	4.14694	2.42305	3.89441	0.139279	-0.0617492
	11.9845	1.79745	4.13757	2.41745	3.88603	0.13878	-0.0638912
	11.9911	1.79089	4.12838	2.41214	3.87789	0.138567	-0.0659739
	11.9978	1.78427	4.11927	2.40684	3.86999	0.138452	-0.0680028
	12.0045	1.77785	4.1103	2.40177	3.8624	0.138275	-0.0699637
	12.0111	1.77154	4.10142	2.39694	3.85502	0.137888	-0.0717374
	12.0178	1.76546	4.09271	2.39223	3.84774	0.137413	-0.0732841
	12.0245	1.75951	4.08415	2.3877	3.84063	0.136916	-0.0747106
	12.0311	1.7539	4.0758	2.38341	3.83362	0.136394	-0.0759034
	12.0378	1.74853	4.06756	2.37924	3.82663	0.135906	-0.0769804
	12.0445	1.74342	4.05966	2.37525	3.81983	0.135293	-0.077813
	12.0511	1.7387	4.05195	2.37155	3.81306	0.134609	-0.0784721
	12.0578	1.73422	4.04437	2.36797	3.80637	0.133865	-0.0788956
	12.0645	1.73006	4.03705	2.36464	3.79983	0.13312	-0.0790795
	12.0711	1.72611	4.02981	2.36148	3.79346	0.132434	-0.0790863
	12.0778	1.72242	4.02268	2.35838	3.78724	0.131749	-0.0787299
	12.0845	1.7189	4.01563	2.35558	3.78125	0.130944	-0.0779586
	12.0911	1.71561	4.00853	2.35277	3.77552	0.13011	-0.076829
	12.0978	1.71252	4.00144	2.35015	3.76998	0.129225	-0.0751603
	12.1045	1.70965	3.99439	2.34771	3.76458	0.128669	-0.0728318
	12.1111	1.70702	3.98741	2.34526	3.75945	0.128387	-0.0698486
	12.1178	1.70463	3.98048	2.34288	3.75453	0.128511	-0.0660346
	12.1245	1.70248	3.97362	2.34061	3.74976	0.128964	-0.0613258
	12.1311	1.70068	3.96698	2.33841	3.74525	0.129681	-0.0555438
	12.1378	1.69901	3.96048	2.33626	3.74095	0.130577	-0.0485118
	12.1445	1.69763	3.95428	2.33424	3.7369	0.131616	-0.0400428
	12.1511	1.69651	3.9484	2.33233	3.73306	0.13272	-0.0299112
	12.1578	1.69556	3.9428	2.3306	3.72949	0.133919	-0.0179341
	12.1645	1.69467	3.9375	2.32887	3.72603	0.13516	-0.0038079
	12.1711	1.69383	3.93237	2.3272	3.72287	0.136384	0.0126467
	12.1778	1.693	3.92749	2.32553	3.71984	0.137475	0.0317832
	12.1845	1.69216	3.92276	2.32387	3.717	0.138565	0.053835
	12.1911	1.6912	3.9181	2.32202	3.71431	0.139664	0.0791715
	12.1978	1.69018	3.91362	2.32017	3.71184	0.140891	0.107963
	12.2045	1.68914	3.90911	2.31814	3.70949	0.142443	0.140628
	12.2111	1.68799	3.90467	2.316	3.70736	0.143976	0.177531
	12.2178	1.68679	3.90024	2.31385	3.70542	0.145298	0.218957
	12.2245	1.68564	3.89586	2.31165	3.70376	0.14616	0.265214
	12.2311	1.68451	3.89158	2.3095	3.70237	0.146398	0.316656
	12.2378	1.68356	3.88747	2.30759	3.7013	0.146192	0.373579
	12.2445	1.68274	3.88343	2.30581	3.70044	0.145755	0.436099
	12.2511	1.68209	3.87965	2.3042	3.69982	0.145219	0.504468
	12.2578	1.68169	3.87597	2.30277	3.69938	0.144778	0.578851
	12.2645	1.68142	3.87256	2.30157	3.69911	0.14446	0.659189
	12.2711	1.68136	3.86929	2.3005	3.69893	0.14435	0.745487
	12.2778	1.68137	3.86626	2.29949	3.69878	0.144307	0.837692
	12.2845	1.68156	3.86337	2.29853	3.69865	0.14424	0.935794
	12.2911	1.68181	3.8607	2.29776	3.69854	0.144002	1.03944
	12.2978	1.68209	3.85817	2.29698	3.69837	0.143503	1.14852
	12.3045	1.68234	3.85568	2.29627	3.69817	0.142839	1.26278
	12.3111	1.68265	3.85337	2.29573	3.698	0.141955	1.38181
	12.3178	1.68293	3.85107	2.29537	3.69783	0.14097	1.50526
	12.3245	1.68312	3.84883	2.29514	3.6977	0.139887	1.6327
	12.3311	1.68335	3.8466	2.29514	3.6976	0.138822	1.76353
	12.3378	1.68347	3.84435	2.29526	3.69758	0.137887	1.89718
	12.3445	1.68365	3.84214	2.29561	3.69755	0.137292	2.03309
	12.3511	1.6837	3.83998	2.29603	3.69759	0.137078	2.17047
	12.3578	1.68389	3.83786	2.29657	3.69776	0.137135	2.30864
	12.3645	1.68412	3.83582	2.29728	3.6979	0.1373	2.44698
	12.3711	1.68436	3.83392	2.29806	3.69817	0.137228	2.58478
	12.3778	1.68479	3.83227	2.29907	3.6985	0.136741	2.72133
	12.3845	1.68541	3.83087	2.3002	3.69903	0.135884	2.85603
	12.3911	1.68623	3.82978	2.30169	3.69959	0.134909	2.98829
	12.3978	1.68719	3.82895	2.3033	3.70027	0.134085	3.11767
	12.4045	1.6884	3.82869	2.30527	3.70122	0.13354	3.24343
	12.4111	1.68989	3.82886	2.30765	3.70244	0.1333	3.36531
	12.4178	1.69148	3.82948	2.31045	3.70388	0.133176	3.48273
	12.4245	1.69326	3.83067	2.31355	3.70578	0.13327	3.59538
	12.4311	1.69529	3.83259	2.31719	3.70818	0.133615	3.70267
	12.4378	1.69766	3.83517	2.32136	3.71114	0.134289	3.80441
	12.4445	1.7002	3.83853	2.32583	3.71467	0.13519	3.90014
	12.4511	1.70306	3.84277	2.33078	3.71902	0.136097	3.98956
	12.4578	1.70633	3.84799	2.3362	3.72429	0.136781	4.07224
	12.4645	1.70996	3.85431	2.3421	3.73049	0.137206	4.14777
	12.4711	1.71406	3.86174	2.34854	3.73766	0.137572	4.21584
	12.4778	1.71859	3.87031	2.35546	3.746	0.138256	4.27605
	12.4845	1.7236	3.88021	2.36309	3.75542	0.139287	4.32809
	12.4911	1.72914	3.89142	2.37131	3.76615	0.140523	4.37149
	12.4978	1.73528	3.90405	2.38037	3.77801	0.141516	4.40594
	12.5045	1.74202	3.91812	2.39033	3.79118	0.141951	4.43115
	12.5111	1.74928	3.93361	2.40117	3.8056	0.141824	4.44688
	12.5178	1.75728	3.95062	2.41309	3.82132	0.141522	4.45284
	12.5245	1.76593	3.96917	2.42609	3.83831	0.141403	4.4489
	12.5311	1.77528	3.98919	2.44015	3.85654	0.1418	4.43494
	12.5378	1.78543	4.01085	2.45529	3.87614	0.14268	4.41116
	12.5445	1.79628	4.03397	2.47163	3.89693	0.143877	4.3776
	12.5511	1.80792	4.05861	2.48891	3.91897	0.145174	4.3345
	12.5578	1.82019	4.0847	2.50721	3.94212	0.146404	4.2823
	12.5645	1.83307	4.11196	2.5264	3.96636	0.147334	4.2215
	12.5711	1.84654	4.14044	2.54649	3.99154	0.147856	4.15278
	12.5778	1.86034	4.16973	2.56723	4.01742	0.147805	4.0769
	12.5845	1.87441	4.19972	2.58851	4.04389	0.147409	3.99489
	12.5911	1.8887	4.2302	2.61027	4.07071	0.147051	3.9078
	12.5978	1.90285	4.26067	2.63214	4.09744	0.147069	3.81673
	12.6045	1.9168	4.291	2.65396	4.12414	0.14771	3.72308
	12.6111	1.93056	4.32091	2.67565	4.15039	0.148831	3.62825
	12.6178	1.94377	4.35002	2.69693	4.17585	0.150184	3.53365
	12.6245	1.95647	4.37804	2.71744	4.20047	0.151526	3.44091
	12.6311	1.96844	4.40467	2.73705	4.22382	0.15268	3.35156
	12.6378	1.97961	4.42963	2.75546	4.2459	0.153637	3.26734
	12.6445	1.98993	4.45264	2.77269	4.26622	0.154496	3.18986
	12.6511	1.99913	4.47336	2.78825	4.28466	0.15516	3.12072
	12.6578	2.00719	4.49156	2.80219	4.30103	0.155805	3.06147
	12.6645	2.01395	4.50705	2.81429	4.31506	0.156379	3.01373
	12.6711	2.01944	4.51951	2.82443	4.3265	0.156997	2.97892
	12.6778	2.02339	4.52873	2.83247	4.33522	0.157834	2.95836
	12.6845	2.02597	4.5347	2.83849	4.34113	0.15877	2.95317
	12.6911	2.02698	4.53727	2.84225	4.344	0.159888	2.9645
	12.6978	2.02643	4.53629	2.84386	4.34371	0.160983	2.99311
	12.7045	2.02423	4.53184	2.84314	4.34042	0.162043	3.0396
	12.7111	2.02058	4.52406	2.84034	4.33403	0.163028	3.10433
	12.7178	2.01533	4.51296	2.83533	4.32466	0.163983	3.18742
	12.7245	2.00865	4.49876	2.82824	4.31253	0.164908	3.28876
	12.7311	2.00053	4.48163	2.81924	4.29765	0.165863	3.40784
	12.7378	1.99121	4.46175	2.80833	4.28032	0.166915	3.54381
	12.7445	1.98073	4.43953	2.7957	4.26086	0.168022	3.69567
	12.7511	1.96941	4.41534	2.78169	4.23958	0.169105	3.86197
	12.7578	1.95737	4.38943	2.76649	4.21679	0.170174	4.04114
	12.7645	1.94493	4.36227	2.7504	4.1928	0.171295	4.23109
	12.7711	1.9322	4.33418	2.73371	4.16804	0.172606	4.42993
	12.7778	1.91957	4.30557	2.71672	4.14282	0.174202	4.63515
	12.7845	1.90707	4.27682	2.69979	4.11745	0.176082	4.84429
	12.7911	1.8951	4.24847	2.68322	4.09224	0.17809	5.0547
	12.7978	1.88371	4.22069	2.66725	4.06762	0.180046	5.2638
	12.8045	1.87317	4.19393	2.65229	4.04379	0.181662	5.4686
	12.8111	1.86356	4.1687	2.63864	4.02116	0.182942	5.66644
	12.8178	1.85514	4.14519	2.62654	4.00002	0.183881	5.85461
	12.8245	1.84803	4.12393	2.61635	3.98058	0.18481	6.03039
	12.8311	1.8424	4.10506	2.60842	3.96312	0.18598	6.19126
	12.8378	1.83859	4.08921	2.60299	3.9481	0.18755	6.33491
	12.8445	1.83685	4.07655	2.60067	3.93567	0.189711	6.45942
	12.8511	1.83738	4.06755	2.60174	3.92607	0.192264	6.56288
	12.8578	1.84048	4.06254	2.60669	3.91957	0.194845	6.64394
	12.8645	1.84656	4.06195	2.61599	3.91641	0.19733	6.70152
	12.8711	1.85585	4.06599	2.63011	3.91676	0.199492	6.73507
	12.8778	1.86875	4.07528	2.64961	3.9209	0.201336	6.74425
	12.8845	1.88568	4.0901	2.67518	3.92897	0.203117	6.72911
	12.8911	1.90684	4.11086	2.70712	3.94116	0.204999	6.69019
	12.8978	1.93283	4.13809	2.74634	3.95764	0.207077	6.62838
	12.9045	1.96393	4.17211	2.79325	3.97849	0.20922	6.5447
	12.9111	2.0006	4.2135	2.84863	4.00411	0.211068	6.4407
	12.9178	2.04345	4.26284	2.91324	4.03441	0.212398	6.31792
	12.9245	2.09275	4.32049	2.98762	4.06973	0.213097	6.17826
	12.9311	2.1492	4.38707	3.0728	4.1102	0.213526	6.02377
	12.9378	2.21323	4.46315	3.1693	4.15602	0.214148	5.85664
	12.9445	2.28534	4.54914	3.27808	4.20724	0.215166	5.67913
	12.9511	2.36581	4.64548	3.39955	4.26402	0.216548	5.49351
	12.9578	2.45528	4.75269	3.53456	4.32645	0.218158	5.30224
	12.9645	2.55374	4.87094	3.68351	4.39452	0.219548	5.10769
	12.9711	2.66156	5.00057	3.84682	4.46822	0.220578	4.91207
	12.9778	2.77871	5.14149	4.02468	4.54736	0.221156	4.71757
	12.9845	2.90518	5.29375	4.21709	4.63177	0.221308	4.52618
	12.9911	3.04065	5.45711	4.4238	4.72126	0.221124	4.3398
	12.9978	3.18481	5.63113	4.64451	4.81545	0.220735	4.16004
	13.0045	3.3371	5.81537	4.87834	4.91398	0.220181	3.98844
	13.0111	3.49677	6.00894	5.12445	5.01622	0.219649	3.82608
	13.0178	3.66283	6.21089	5.38135	5.12169	0.219322	3.67408
	13.0245	3.83427	6.42001	5.64754	5.22968	0.219437	3.53307
	13.0311	4.00964	6.63479	5.92113	5.33945	0.219943	3.40366
	13.0378	4.18752	6.85356	6.19984	5.45011	0.220781	3.28606
	13.0445	4.36622	7.07448	6.48123	5.56072	0.221871	3.18044
	13.0511	4.54392	7.29539	6.76256	5.67037	0.222886	3.08668
	13.0578	4.71876	7.51405	7.0411	5.77794	0.223684	3.00454
	13.0645	4.8888	7.72808	7.31373	5.88233	0.22428	2.93349
	13.0711	5.05199	7.93502	7.57736	5.98235	0.224656	2.87299
	13.0778	5.2063	8.13247	7.82901	6.07685	0.224826	2.82221
	13.0845	5.34994	8.318	8.06564	6.16473	0.224927	2.78025
	13.0911	5.48093	8.48927	8.28433	6.24482	0.225027	2.74622
	13.0978	5.59766	8.64413	8.48234	6.31615	0.225311	2.71886
	13.1045	5.69868	8.7806	8.6571	6.37768	0.225764	2.69711
	13.1111	5.78276	8.89698	8.80659	6.42871	0.226166	2.67982
	13.1178	5.84886	8.99175	8.92884	6.46865	0.226385	2.6657
	13.1245	5.89624	9.06373	9.02253	6.49686	0.22645	2.65365
	13.1311	5.92449	9.11195	9.08649	6.51301	0.226474	2.64256
	13.1378	5.9333	9.13602	9.12029	6.517	0.226688	2.6313
	13.1445	5.9229	9.13571	9.12368	6.50891	0.227091	2.61896
	13.1511	5.89364	9.11128	9.0971	6.48883	0.22753	2.60471
	13.1578	5.84602	9.06313	9.04113	6.4571	0.227933	2.58772
	13.1645	5.78094	8.99222	8.95703	6.41421	0.228188	2.56752
	13.1711	5.69955	8.89976	8.84622	6.36089	0.228635	2.54367
	13.1778	5.60312	8.78718	8.71062	6.29777	0.229366	2.51577
	13.1845	5.49298	8.65607	8.55207	6.22569	0.230365	2.48382
	13.1911	5.37073	8.50825	8.37296	6.14558	0.231665	2.44781
	13.1978	5.23806	8.34579	8.17573	6.05842	0.232962	2.40806
	13.2045	5.09668	8.17071	7.96294	5.96523	0.234199	2.36484
	13.2111	4.94831	7.98504	7.73716	5.86694	0.235286	2.31852
	13.2178	4.79465	7.79108	7.50113	5.76474	0.236229	2.26983
	13.2245	4.63739	7.59076	7.2574	5.65952	0.236948	2.21929
	13.2311	4.47804	7.3861	7.00843	5.5523	0.237399	2.16773
	13.2378	4.31813	7.17922	6.75678	5.44419	0.237596	2.11575
	13.2445	4.15908	6.97188	6.50471	5.33599	0.237624	2.06438
	13.2511	4.00207	6.76575	6.2542	5.22857	0.237731	2.0142
	13.2578	3.84817	6.5625	6.00725	5.12277	0.238215	1.96616
	13.2645	3.69845	6.36342	5.7655	5.01912	0.239106	1.92092
	13.2711	3.55367	6.16971	5.53024	4.91827	0.240354	1.8792
	13.2778	3.41443	5.98243	5.30273	4.8207	0.241665	1.84158
	13.2845	3.28133	5.80236	5.08386	4.7267	0.242939	1.80862
	13.2911	3.15485	5.6301	4.87441	4.63658	0.244065	1.78097
	13.2978	3.03523	5.4662	4.67485	4.55051	0.245155	1.75872
	13.3045	2.92256	5.31085	4.48567	4.46858	0.246185	1.74228
	13.3111	2.817	5.16427	4.30685	4.39078	0.247208	1.73172
	13.3178	2.71848	5.02666	4.13865	4.31733	0.248456	1.72695
[truncated: 5,502 more rows]

## Sheet: Fig. 3C
C18 column - Figure 3C
	Time	C55OH	PA+VAN	Lipid I	Control
	0.0003125	0.0133514	-0.0705123	0.00339747	0.398574
	0.00364583	0.0138283	-0.0700951	0.0038147	0.39986
	0.00697917	0.0142455	-0.0696182	0.00429153	0.401178
	0.0103125	0.0147223	-0.0690222	0.00482798	0.402487
	0.0136458	0.0151992	-0.0683665	0.00548363	0.403741
	0.0169792	0.0156164	-0.0519156	0.00607967	0.405115
	0.0203125	0.015974	-0.0517368	0.00673533	0.406363
	0.0236458	0.0162125	-0.051558	0.00739098	0.407557
	0.0269792	0.0164509	-0.0513196	0.00798702	0.408748
	0.0303125	0.0165105	-0.0510812	0.00858307	0.409821
	0.0336458	0.0165105	-0.0509024	0.00917911	0.410896
	0.0369792	0.0164509	-0.0506639	0.00971556	0.411971
	0.0403125	0.0163317	-0.0504851	0.0101924	0.413105
	0.0436458	0.0161529	-0.0503659	0.0106096	0.414237
	0.0469792	0.015974	-0.0502467	0.0109673	0.415369
	0.0503125	0.0157356	-0.0501871	0.0111461	0.416564
	0.0536458	0.0154972	-0.0500679	0.0112653	0.417878
	0.0569792	0.0153184	-0.0500083	0.0112653	0.419186
	0.0603125	0.0151992	-0.0498295	0.0111461	0.420495
	0.0636458	0.0151396	-0.0496507	0.0110269	0.421808
	0.0669792	0.0151396	-0.0494719	0.010848	0.423177
	0.0703125	0.0152588	-0.0491738	0.0107288	0.424483
	0.0736458	0.0154376	-0.0488162	0.0106692	0.425733
	0.0769792	0.015676	-0.0484586	0.0106096	0.427046
	0.0803125	0.0159144	-0.0480413	0.0106692	0.428354
	0.0836458	0.0162125	-0.00667572	0.0107884	0.429603
	0.0869792	0.0165105	-0.00590086	0.0109076	0.430859
	0.0903125	0.0166893	-0.00524521	0.0110269	0.43211
	0.0936458	0.0168681	-0.00470877	0.0110865	0.433299
	0.0969792	0.0168681	-0.00417233	0.0111461	0.434493
	0.100312	0.0168085	-0.00375509	0.0111461	0.43569
	0.103646	0.0165701	-0.00327825	0.0110865	0.436883
	0.106979	0.0162721	-0.00280142	0.0110269	0.438018
	0.110312	0.0158548	-0.00226498	0.0109076	0.439153
	0.113646	0.015378	-0.00166893	0.0107884	0.440165
	0.116979	0.0148416	-0.00101328	0.0106692	0.441239
	0.120313	0.0143051	-0.000298023	0.0106096	0.44219
	0.123646	0.0137687	0.000476837	0.01055	0.443083
	0.126979	0.0133514	0.0012517	0.01055	0.444032
	0.130312	0.0129938	0.00208616	0.0106096	0.444803
	0.133646	0.0127554	0.00292063	0.0107288	0.445694
	0.136979	0.0126362	0.00375509	0.0109673	0.446521
	0.140313	0.0126958	0.00452995	0.0112057	0.447296
	0.143646	0.0128746	0.00536442	0.0115037	0.448249
	0.146979	0.013113	0.00613928	0.0118017	0.449205
	0.150312	0.013411	0.00691414	0.0121593	0.450279
	0.153646	0.0137091	0.007689	0.0123978	0.451416
	0.156979	0.0139475	0.00852346	0.0126362	0.452733
	0.160312	0.0141263	0.00929832	0.0127554	0.454047
	0.163646	0.0141859	0.0101328	0.0127554	0.455424
	0.166979	0.0141859	0.0110269	0.0127554	0.456793
	0.170313	0.0140667	0.0118017	0.0126362	0.458105
	0.173646	0.0138283	0.0126362	0.012517	0.459416
	0.176979	0.0135303	0.0133514	0.0123382	0.460605
	0.180312	0.0132322	0.0140667	0.012219	0.461739
	0.183646	0.0128746	0.0146031	0.0121593	0.462871
	0.186979	0.012517	0.01508	0.0120997	0.464004
	0.190312	0.012219	0.0154972	0.0120997	0.465195
	0.193646	0.0119805	0.0158548	0.0121593	0.46633
	0.196979	0.0117421	0.0162125	0.012219	0.467644
	0.200313	0.0116825	0.0165701	0.0122786	0.468954
	0.203646	0.0116825	0.0170469	0.0123382	0.470269
	0.206979	0.0118017	0.0175238	0.0124574	0.471697
	0.210313	0.0119805	0.0181198	0.0125766	0.473002
	0.213646	0.012219	0.0188351	0.0127554	0.474189
	0.216979	0.0124574	0.0195503	0.0129342	0.475253
	0.220312	0.0126958	0.0203252	0.013113	0.476202
	0.223646	0.0128746	0.0210404	0.0133514	0.476971
	0.226979	0.0129938	0.0216961	0.0135303	0.477561
	0.230313	0.0129938	0.0222921	0.0137091	0.478034
	0.233646	0.0129342	0.0228286	0.0138283	0.478392
	0.236979	0.0127554	0.0233054	0.0138879	0.478871
	0.240313	0.0125766	0.0237226	0.0138283	0.479289
	0.243646	0.0123978	0.0240803	0.0137687	0.479833
	0.246979	0.0121593	0.0244975	0.0135899	0.480554
	0.250312	0.0119805	0.0249743	0.013411	0.481392
	0.253646	0.0117421	0.0254512	0.0132918	0.482347
	0.256979	0.0115633	0.0259876	0.0131726	0.483422
	0.260313	0.0113249	0.0265837	0.0130534	0.484557
	0.263646	0.0110865	0.0271797	0.0130534	0.485746
	0.266979	0.010848	0.0277758	0.0130534	0.486877
	0.270313	0.0106096	0.0283718	0.013113	0.488068
	0.273646	0.0103712	0.0289083	0.0131726	0.489323
	0.276979	0.0101924	0.0294447	0.0132322	0.490634
	0.280313	0.0100136	0.0299215	0.0132918	0.491885
	0.283646	0.00983477	0.0303984	0.0133514	0.49326
	0.286979	0.00971556	0.0308156	0.0133514	0.494694
	0.290312	0.00959635	0.0312328	0.013411	0.496129
	0.293646	0.00953674	0.0315905	0.0133514	0.497683
	0.296979	0.00947714	0.0318885	0.0133514	0.499174
	0.300312	0.00947714	0.0321865	0.0133514	0.500666
	0.303646	0.00947714	0.0324845	0.0132918	0.502157
	0.306979	0.00947714	0.032723	0.0132322	0.503522
	0.310312	0.00953674	0.0329614	0.0132322	0.504773
	0.313646	0.00959635	0.0331998	0.0131726	0.505905
	0.316979	0.00965595	0.0333786	0.013113	0.506911
	0.320312	0.00977516	0.0334978	0.0130534	0.50774
	0.323646	0.00989437	0.033617	0.0129938	0.508392
	0.326979	0.0100732	0.0336766	0.0129938	0.509044
	0.330313	0.0101924	0.0337362	0.0129938	0.509576
	0.333646	0.0103712	0.0337958	0.0130534	0.510054
	0.336979	0.01055	0.033915	0.0131726	0.510652
	0.340313	0.0107884	0.0340939	0.0134707	0.511248
	0.343646	0.0110269	0.0343323	0.0137687	0.511844
	0.346979	0.0112653	0.0346899	0.0142455	0.5125
	0.350313	0.0114441	0.0351667	0.0147223	0.513154
	0.353646	0.0116229	0.0357032	0.0152588	0.513813
	0.356979	0.0116825	0.0363588	0.0158548	0.514527
	0.360312	0.0116825	0.0370145	0.0163317	0.515124
	0.363646	0.0116229	0.0376105	0.0167489	0.51572
	0.366979	0.0115037	0.0382066	0.0171065	0.516254
	0.370312	0.0112653	0.0386238	0.0172853	0.516791
	0.373646	0.0109673	0.0389814	0.0172853	0.517327
	0.376979	0.0106692	0.0391603	0.0171661	0.517923
	0.380312	0.0103116	0.0392199	0.0169277	0.518581
	0.383646	0.0100136	0.0392199	0.0165105	0.519478
	0.386979	0.00971556	0.0391603	0.0160336	0.520428
	0.390313	0.00941753	0.039041	0.0154376	0.521499
	0.393646	0.00917911	0.0389814	0.0148416	0.522633
	0.396979	0.0090003	0.0389218	0.0142455	0.52388
	0.400313	0.00882149	0.0389218	0.0137091	0.524949
	0.403646	0.00870228	0.0389814	0.0132322	0.526021
	0.406979	0.00852346	0.0391006	0.012815	0.52691
	0.410313	0.00840425	0.0392795	0.0125766	0.527624
	0.413646	0.00828505	0.0393987	0.012517	0.528218
	0.416979	0.00810623	0.0395775	0.0126362	0.528576
	0.420312	0.00798702	0.0397563	0.0128746	0.528935
	0.423646	0.00780821	0.0399351	0.0132322	0.529116
	0.426979	0.007689	0.0400543	0.0136495	0.529356
	0.430312	0.00751018	0.0402331	0.0141263	0.529539
	0.433646	0.00739098	0.0404119	0.0145435	0.52984
	0.436979	0.00733137	0.0405312	0.0148416	0.530202
	0.440312	0.00727177	0.04071	0.0150204	0.530742
	0.443646	0.00721216	0.0408888	0.01508	0.531342
	0.446979	0.00721216	0.0410676	0.0149608	0.532121
	0.450313	0.00721216	0.0412464	0.0147223	0.533014
	0.453646	0.00727177	0.0413656	0.0144243	0.53385
	0.456979	0.00721216	0.0415444	0.0140071	0.534741
	0.460313	0.00715256	0.0416636	0.0135303	0.535574
	0.463646	0.00709295	0.0417829	0.013113	0.536406
	0.466979	0.00697374	0.0419617	0.0126958	0.53712
	0.470313	0.00679493	0.0420213	0.0123382	0.537831
	0.473646	0.00667572	0.0421405	0.0120401	0.538423
	0.476979	0.00655651	0.0422001	0.0118017	0.538959
	0.480312	0.00655651	0.0422597	0.0115633	0.539431
	0.483646	0.00655651	0.0422597	0.0114441	0.539846
	0.486979	0.00667572	0.0421405	0.0113249	0.540264
	0.490312	0.00691414	0.0419021	0.0112057	0.540741
	0.493646	0.00715256	0.041604	0.0111461	0.541159
	0.496979	0.00751018	0.0411272	0.0111461	0.541633
	0.500313	0.00780821	0.0406504	0.0112057	0.541988
	0.503646	0.00804663	0.0400543	0.0112653	0.542287
	0.506979	0.00828505	0.0394583	0.0113845	0.542644
	0.510312	0.00834465	0.0388622	0.0115037	0.542942
	0.513646	0.00834465	0.0383258	0.0116825	0.543181
	0.516979	0.00828505	0.0378489	0.0118613	0.543478
	0.520312	0.00810623	0.0374913	0.0120997	0.543839
	0.523646	0.00786781	0.0372529	0.0122786	0.544198
	0.526979	0.00762939	0.0371337	0.0123978	0.544614
	0.530312	0.00745058	0.0370741	0.0125766	0.545094
	0.533646	0.00727177	0.0370741	0.0126958	0.545692
	0.536979	0.00715256	0.0371933	0.0127554	0.546228
	0.540312	0.00715256	0.0373125	0.012815	0.546765
	0.543646	0.00727177	0.0374317	0.012815	0.54724
	0.546979	0.00739098	0.0375509	0.0126958	0.547591
	0.550312	0.00751018	0.0376105	0.012517	0.547826
	0.553646	0.00762939	0.0377297	0.0122786	0.547944
	0.556979	0.0077486	0.0377893	0.0119805	0.548058
	0.560312	0.00780821	0.0378489	0.0115633	0.547998
	0.563646	0.0077486	0.0379086	0.0111461	0.547996
	0.566979	0.007689	0.0380278	0.0106692	0.547993
	0.570312	0.00751018	0.0380874	0.010252	0.547997
	0.573646	0.00733137	0.038147	0.00983477	0.548174
	0.576979	0.00715256	0.0382066	0.00953674	0.548355
	0.580313	0.00691414	0.0382066	0.00929832	0.54866
	0.583646	0.00667572	0.038147	0.00923872	0.549079
	0.586979	0.00649691	0.0380278	0.00923872	0.549562
	0.590313	0.00625849	0.0377893	0.00935793	0.550165
	0.593646	0.00602007	0.0374913	0.00959635	0.550821
	0.596979	0.00578165	0.0371933	0.00989437	0.551362
	0.600313	0.00554323	0.0368357	0.010252	0.552022
	0.603646	0.00536442	0.036478	0.0106096	0.552557
	0.606979	0.005126	0.0361204	0.0109673	0.553094
	0.610313	0.00494719	0.0357628	0.0113249	0.553572
	0.613646	0.00482798	0.0354648	0.0116229	0.554044
	0.616979	0.00470877	0.0351667	0.0118613	0.554393
	0.620313	0.00470877	0.0349283	0.0120401	0.554567
	0.623646	0.00470877	0.0346899	0.0121593	0.554742
	0.626979	0.00470877	0.0345111	0.012219	0.554797
	0.630313	0.00470877	0.0343323	0.0122786	0.554857
	0.633646	0.00470877	0.0341535	0.012219	0.554911
	0.636979	0.00470877	0.0339746	0.0121593	0.55485
	0.640312	0.00464916	0.0337958	0.0120401	0.554793
	0.643646	0.00452995	0.0336766	0.0118017	0.554793
	0.646979	0.00447035	0.0334978	0.0115633	0.554852
	0.650312	0.00435114	0.0332594	0.0113249	0.554913
	0.653646	0.00429153	0.033021	0.0110269	0.555096
	0.656979	0.00423193	0.032723	0.0107288	0.555399
	0.660312	0.00423193	0.0323653	0.0104904	0.555755
	0.663646	0.00429153	0.0318885	0.010252	0.556113
	0.666979	0.00435114	0.0314116	0.0100732	0.556532
	0.670312	0.00441074	0.0308752	0.0100136	0.556953
	0.673646	0.00452995	0.0303388	0.0100732	0.557485
	0.676979	0.00458956	0.0298023	0.010252	0.557782
	0.680312	0.00464916	0.0293851	0.01055	0.558141
	0.683646	0.00464916	0.0289679	0.0109673	0.558373
	0.686979	0.00458956	0.0286698	0.0113845	0.558432
	0.690312	0.00452995	0.0284314	0.0118017	0.55849
	0.693646	0.00435114	0.0283122	0.0122786	0.558368
	0.696979	0.00411272	0.028193	0.0126362	0.558191
	0.700313	0.0038743	0.0280738	0.0129342	0.55789
	0.703646	0.00357628	0.0279546	0.0131726	0.55753
	0.706979	0.00321865	0.0278354	0.0133514	0.557174
	0.710313	0.00286102	0.0276566	0.013411	0.556753
	0.713646	0.002563	0.0274181	0.0134707	0.556337
	0.716979	0.00226498	0.0271797	0.0135303	0.55598
	0.720313	0.00208616	0.0268817	0.0135899	0.555557
	0.723646	0.00190735	0.0266433	0.0136495	0.555139
	0.726979	0.00184774	0.0264049	0.0137091	0.554782
	0.730313	0.00184774	0.0261664	0.0137091	0.554481
	0.733646	0.00190735	0.0259876	0.0136495	0.554184
	0.736979	0.00202656	0.0257492	0.0134707	0.554005
	0.740313	0.00220537	0.0255704	0.0132322	0.553765
	0.743646	0.00238419	0.0252724	0.0128746	0.553652
	0.746979	0.002563	0.0249743	0.0124574	0.553593
	0.750313	0.00274181	0.0246167	0.0119209	0.553595
	0.753646	0.00292063	0.0241995	0.0114441	0.553596
	0.756979	0.00303984	0.0237823	0.0109673	0.553601
	0.760312	0.00315905	0.0233054	0.01055	0.553663
	0.763646	0.00321865	0.0228286	0.0101924	0.553659
	0.766979	0.00327825	0.0223517	0.00995398	0.553601
	0.770312	0.00333786	0.0219345	0.00977516	0.553479
	0.773646	0.00333786	0.0215769	0.00959635	0.55324
	0.776979	0.00339747	0.0212789	0.00947714	0.553056
	0.780312	0.00345707	0.0209808	0.00935793	0.552694
	0.783646	0.00357628	0.0207424	0.00923872	0.552279
	0.786979	0.00363588	0.020504	0.00911951	0.551918
	0.790312	0.00375509	0.0203252	0.0090003	0.55138
	0.793646	0.00393391	0.0201464	0.00888109	0.550904
	0.796979	0.00405312	0.019908	0.00876188	0.550366
	0.800312	0.00423193	0.0197291	0.00876188	0.549774
	0.803646	0.00441074	0.0194907	0.00876188	0.549236
	0.806979	0.00464916	0.0191927	0.00888109	0.548639
	0.810312	0.00488758	0.0188351	0.0090003	0.548109
	0.813646	0.005126	0.0184774	0.00917911	0.54763
	0.816979	0.00536442	0.0180602	0.00941753	0.547094
	0.820312	0.00560284	0.0175834	0.00959635	0.54668
	0.823646	0.00578165	0.0171065	0.00983477	0.546261
	0.826979	0.00590086	0.0166893	0.0100136	0.545964
	0.830313	0.00590086	0.0162125	0.0101924	0.545663
	0.833646	0.00578165	0.0158548	0.0103116	0.545307
	0.836979	0.00554323	0.0154972	0.0103712	0.545125
	0.840313	0.0051856	0.0151992	0.0104308	0.544825
	0.843646	0.00464916	0.0150204	0.0104904	0.544588
	0.846979	0.00417233	0.0149012	0.0104904	0.544346
	0.850313	0.00363588	0.0148416	0.0104904	0.544111
	0.853646	0.00315905	0.014782	0.0104904	0.543934
	0.856979	0.00280142	0.0147223	0.0104904	0.543754
	0.860313	0.00250339	0.0147223	0.0104904	0.543519
	0.863646	0.00238419	0.0146031	0.0104904	0.54334
	0.866979	0.00244379	0.0144839	0.0104308	0.543098
	0.870313	0.002563	0.0142455	0.0103712	0.542802
	0.873646	0.00280142	0.0140071	0.010252	0.542499
	0.876979	0.00309944	0.0137091	0.0101328	0.542078
	0.880313	0.00339747	0.0133514	0.00989437	0.5416
	0.883646	0.00363588	0.0129342	0.00953674	0.541118
	0.886979	0.0038147	0.0125766	0.00917911	0.540521
	0.890312	0.00393391	0.012219	0.00876188	0.539923
	0.893646	0.00393391	0.0119805	0.00834465	0.539267
	0.896979	0.0038743	0.0117421	0.00792742	0.538616
	0.900312	0.00375509	0.0116229	0.00762939	0.537962
	0.903646	0.00351667	0.0115037	0.00739098	0.537188
	0.906979	0.00321865	0.0115037	0.00733137	0.536419
	0.910312	0.00292063	0.0115037	0.00733137	0.535702
	0.913646	0.002563	0.0115633	0.00751018	0.534808
	0.916979	0.00226498	0.0116229	0.0077486	0.533976
	0.920312	0.00196695	0.0116825	0.00804663	0.533081
	0.923646	0.00178814	0.0117421	0.00828505	0.532188
	0.926979	0.00160932	0.0118017	0.00852346	0.531353
	0.930312	0.00154972	0.0118613	0.00870228	0.530519
	0.933646	0.00154972	0.0119805	0.00876188	0.529681
	0.936979	0.00166893	0.0120401	0.00870228	0.528848
	0.940312	0.00184774	0.0120997	0.00858307	0.528133
	0.943646	0.00208616	0.0121593	0.00840425	0.527415
	0.946979	0.00244379	0.0121593	0.00816584	0.52664
	0.950313	0.00280142	0.0121593	0.00792742	0.525928
	0.953646	0.00315905	0.0120997	0.007689	0.525212
	0.956979	0.00345707	0.0119805	0.00756979	0.524434
	0.960313	0.00375509	0.0119209	0.00745058	0.523663
	0.963646	0.00399351	0.0118613	0.00739098	0.522947
	0.966979	0.00411272	0.0118613	0.00745058	0.522172
	0.970313	0.00417233	0.0119805	0.00751018	0.521459
	0.973646	0.00411272	0.0122786	0.00756979	0.520744
	0.976979	0.00399351	0.0126958	0.007689	0.520027
	0.980313	0.00375509	0.0133514	0.0077486	0.519307
	0.983646	0.00351667	0.0141263	0.00780821	0.518531
	0.986979	0.00321865	0.0150204	0.0077486	0.517814
	0.990313	0.00292063	0.0160336	0.007689	0.517035
	0.993646	0.002563	0.0169873	0.00756979	0.516196
	0.996979	0.00214577	0.0178814	0.00745058	0.515241
	1.00031	0.00178814	0.0185966	0.00721216	0.514288
	1.00365	0.00149012	0.0190735	0.00697374	0.513274
	1.00698	0.00113249	0.0193119	0.00679493	0.512204
	1.01031	0.00089407	0.0193119	0.00655651	0.511132
	1.01365	0.000715256	0.0191331	0.0064373	0.510001
	1.01698	0.000655651	0.0187159	0.00631809	0.508874
	1.02031	0.000715256	0.0181794	0.00625849	0.507801
	1.02365	0.00077486	0.017643	0.00625849	0.506731
	1.02698	0.000953674	0.0171065	0.0063777	0.505719
	1.03031	0.00119209	0.0166893	0.0064373	0.50465
	1.03365	0.00137091	0.0163317	0.00655651	0.50382
	1.03698	0.00154972	0.0160933	0.00667572	0.502925
	1.04031	0.00160932	0.0160336	0.00679493	0.502031
	1.04365	0.00154972	0.015974	0.00685453	0.50108
	1.04698	0.00143051	0.0160933	0.00685453	0.500245
	1.05031	0.00119209	0.0162721	0.00679493	0.49923
	1.05365	0.00089407	0.0164509	0.00673533	0.498272
	1.05698	0.000536442	0.0167489	0.00667572	0.497196
	1.06031	0.000178814	0.0171065	0.00661612	0.49612
	1.06365	-0.000119209	0.0174642	0.00655651	0.49498
	1.06698	-0.000357628	0.0178814	0.00655651	0.493788
	1.07031	-0.000476837	0.0183582	0.00661612	0.492712
	1.07365	-0.000536442	0.0188947	0.00667572	0.491518
	1.07698	-0.000476837	0.0193715	0.00679493	0.490446
	1.08031	-0.000357628	0.019908	0.00691414	0.489314
	1.08365	-0.000238419	0.0203252	0.00703335	0.488249
	1.08698	-5.96046e-05	0.020802	0.00709295	0.487239
	1.09031	0.000119209	0.0211596	0.00715256	0.486167
	1.09365	0.000298023	0.0214577	0.00721216	0.485158
	1.09698	0.000417233	0.0216961	0.00715256	0.484206
	1.10031	0.000536442	0.0218749	0.00715256	0.483193
	1.10365	0.000655651	0.0220537	0.00709295	0.482236
	1.10698	0.000715256	0.0222325	0.00703335	0.481223
	1.11031	0.00077486	0.022471	0.00691414	0.480204
	1.11365	0.000834465	0.0228286	0.00691414	0.479069
	1.11698	0.000834465	0.0233054	0.00685453	0.477992
	1.12031	0.00089407	0.0240803	0.00685453	0.476793
	1.12365	0.00089407	0.0250936	0.00691414	0.475541
	1.12698	0.00089407	0.0265241	0.00697374	0.474287
	1.13031	0.000834465	0.0283718	0.00709295	0.472973
	1.13365	0.000715256	0.0308156	0.00715256	0.471665
	1.13698	0.000536442	0.0339746	0.00721216	0.470415
	1.14031	0.000238419	0.0380278	0.00721216	0.469106
	1.14365	-5.96046e-05	0.0430942	0.00721216	0.467915
	1.14698	-0.000476837	0.0494719	0.00721216	0.466725
	1.15031	-0.000834465	0.0573397	0.00721216	0.465535
	1.15365	-0.0012517	0.0670552	0.00715256	0.464344
	1.15698	-0.00154972	0.0788569	0.00715256	0.463214
	1.16031	-0.00184774	0.0931025	0.00715256	0.462141
	1.16365	-0.00196695	0.110149	0.00727177	0.461008
	1.16698	-0.00202656	0.130415	0.00745058	0.459996
	1.17031	-0.00202656	0.154197	0.007689	0.458979
	1.17365	-0.00196695	0.181913	0.00798702	0.457966
	1.17698	-0.00184774	0.213981	0.00834465	0.457015
	1.18031	-0.00172854	0.250816	0.00864267	0.456181
	1.18365	-0.00160932	0.292718	0.0089407	0.455284
	1.18698	-0.00154972	0.340104	0.00911951	0.454389
	1.19031	-0.00154972	0.393331	0.00917911	0.453433
	1.19365	-0.00154972	0.452816	0.00905991	0.452475
	1.19698	-0.00154972	0.518858	0.00882149	0.4514
	1.20031	-0.00154972	0.591874	0.00846386	0.450329
	1.20365	-0.00154972	0.672281	0.00798702	0.449193
	1.20698	-0.00154972	0.760436	0.00751018	0.448059
	1.21031	-0.00149012	0.856876	0.00703335	0.446867
	1.21365	-0.00149012	0.962198	0.00655651	0.445675
	1.21698	-0.00143051	1.07712	0.00619888	0.444483
	1.22031	-0.00149012	1.20246	0.00596046	0.443291
	1.22365	-0.00154972	1.33932	0.00584126	0.442039
	1.22698	-0.00166893	1.48886	0.00590086	0.440788
	1.23031	-0.00184774	1.65278	0.00607967	0.439474
	1.23365	-0.00202656	1.83272	0.0063777	0.438044
	1.23698	-0.00232458	2.03091	0.00673533	0.436676
	1.24031	-0.002563	2.24978	0.00721216	0.435303
	1.24365	-0.00280142	2.49213	0.00762939	0.433878
	1.24698	-0.00298023	2.76101	0.00804663	0.43257
	1.25031	-0.00303984	3.0598	0.00840425	0.431319
	1.25365	-0.00303984	3.39222	0.00864267	0.430073
	1.25698	-0.00292063	3.76219	0.00870228	0.428941
	1.26031	-0.00280142	4.1737	0.00864267	0.42781
	1.26365	-0.002563	4.6311	0.00840425	0.4268
	1.26698	-0.00232458	5.13864	0.00804663	0.425844
	1.27031	-0.00208616	5.70071	0.00762939	0.424766
	1.27365	-0.00184774	6.32161	0.00715256	0.423752
	1.27698	-0.00166893	7.00539	0.00661612	0.422677
	1.28031	-0.00154972	7.75605	0.00619888	0.421542
	1.28365	-0.00143051	8.57705	0.00584126	0.42041
	1.28698	-0.00143051	9.47154	0.00560284	0.41922
	1.29031	-0.00143051	10.4419	0.00548363	0.41803
	1.29365	-0.00149012	11.4901	0.00548363	0.416777
	1.29698	-0.00154972	12.6172	0.00560284	0.415469
	1.30031	-0.00166893	13.8234	0.00578165	0.414159
	1.30365	-0.00172854	15.1082	0.00602007	0.41285
	1.30698	-0.00184774	16.4699	0.00625849	0.411539
	1.31031	-0.00190735	17.906	0.00649691	0.410224
	1.31365	-0.00196695	19.4129	0.00667572	0.408906
	1.31698	-0.00196695	20.9862	0.00679493	0.40753
	1.32031	-0.00202656	22.6203	0.00685453	0.406153
	1.32365	-0.00208616	24.3089	0.00685453	0.404717
	1.32698	-0.00220537	26.0445	0.00685453	0.403283
	1.33031	-0.00238419	27.8194	0.00679493	0.401728
	1.33365	-0.0026226	29.6246	0.00673533	0.40018
	1.33698	-0.00292063	31.4509	0.00667572	0.398631
	1.34031	-0.00333786	33.2885	0.00661612	0.397088
	1.34365	-0.00375509	35.1275	0.00655651	0.395666
	1.34698	-0.00423193	36.9574	0.00655651	0.39424
	1.35031	-0.00464916	38.7681	0.00655651	0.392996
	1.35365	-0.00500679	40.5491	0.00661612	0.391812
	1.35698	-0.00524521	42.2906	0.00661612	0.390804
	1.36031	-0.00530481	43.9827	0.00661612	0.389911
	1.36365	-0.00524521	45.6163	0.00655651	0.389017
	1.36698	-0.00506639	47.1825	0.00655651	0.388241
	1.37031	-0.00464916	48.6733	0.00655651	0.387401
	1.37365	-0.00417233	50.0814	0.00649691	0.386439
	1.37698	-0.00369549	51.4003	0.0064373	0.38536
	1.38031	-0.00315905	52.6246	0.00631809	0.384166
	1.38365	-0.00268221	53.7497	0.00619888	0.382847
	1.38698	-0.00232458	54.7721	0.00613928	0.381356
	1.39031	-0.00214577	55.6894	0.00602007	0.379925
	1.39365	-0.00208616	56.5	0.00590086	0.378378
	1.39698	-0.00220537	57.2033	0.00584126	0.376951
	1.40031	-0.00244379	57.7999	0.00578165	0.375464
	1.40365	-0.00286102	58.291	0.00572205	0.374162
	1.40698	-0.00327825	58.6786	0.00578165	0.372974
	1.41031	-0.00375509	58.9654	0.00584126	0.371906
	1.41365	-0.00417233	59.1549	0.00602007	0.370953
	1.41698	-0.00458956	59.2508	0.00625849	0.370002
	1.42031	-0.00494719	59.2574	0.00655651	0.369108
	1.42365	-0.00524521	59.1794	0.00685453	0.368152
	1.42698	-0.00548363	59.0216	0.00715256	0.367197
	1.43031	-0.00572205	58.7891	0.00745058	0.366239
	1.43365	-0.00596046	58.4869	0.007689	0.365222
	1.43698	-0.00613928	58.1204	0.00786781	0.364145
	1.44031	-0.00631809	57.6945	0.00798702	0.363009
	1.44365	-0.0064373	57.2145	0.00810623	0.361872
	1.44698	-0.00649691	56.6852	0.00822544	0.360679
	1.45031	-0.00649691	56.1115	0.00834465	0.359544
	1.45365	-0.0064373	55.4978	0.00846386	0.35829
	1.45698	-0.00631809	54.8485	0.00864267	0.357039
	1.46031	-0.00613928	54.1677	0.0089407	0.355787
	1.46365	-0.00596046	53.4593	0.00923872	0.354476
	1.46698	-0.00578165	52.7267	0.00965595	0.353164
	1.47031	-0.00560284	51.9733	0.0100732	0.351796
	1.47365	-0.00548363	51.2021	0.0104308	0.350486
	1.47698	-0.00542402	50.4158	0.010848	0.349177
	1.48031	-0.00542402	49.6168	0.0112057	0.347868
	1.48365	-0.00548363	48.8075	0.0115633	0.346499
	1.48698	-0.00554323	47.9898	0.0119209	0.34519
	1.49031	-0.00560284	47.1656	0.0122786	0.343877
	1.49365	-0.00560284	46.3365	0.0126958	0.342508
	1.49698	-0.00542402	45.5042	0.0131726	0.341202
	1.50031	-0.005126	44.6699	0.0137091	0.339952
	1.50365	-0.00470877	43.8352	0.0143051	0.338639
	1.50698	-0.00417233	43.0012	0.0149608	0.337391
	1.51031	-0.00351667	42.1692	0.015676	0.336198
	1.51365	-0.00280142	41.3405	0.0163913	0.335004
	1.51698	-0.00202656	40.5161	0.0171661	0.333872
	1.52031	-0.00137091	39.6972	0.0180006	0.332738
	1.52365	-0.00077486	38.8848	0.0188351	0.331601
	1.52698	-0.000357628	38.0797	0.0197291	0.330405
	1.53031	-0.000119209	37.283	0.0207424	0.32915
	1.53365	5.96046e-05	36.4953	0.0218153	0.327834
	1.53698	5.96046e-05	35.7172	0.023067	0.326464
	1.54031	5.96046e-05	34.9496	0.0243783	0.325153
	1.54365	0	34.1929	0.0258684	0.323781
	1.54698	-0.000119209	33.4475	0.0274181	0.322416
	1.55031	-0.000178814	32.7139	0.0290871	0.321104
	1.55365	-0.000178814	31.9924	0.0309348	0.319738
	1.55698	-0.000178814	31.2831	0.0328422	0.318493
	1.56031	-0.000178814	30.5863	0.0349283	0.317301
	1.56365	-0.000119209	29.902	0.0371933	0.316051
	1.56698	-0.000119209	29.2303	0.0396371	0.314864
	1.57031	-5.96046e-05	28.5711	0.0422597	0.313733
	1.57365	-5.96046e-05	27.9246	0.0450611	0.312541
	1.57698	0	27.2907	0.0480413	0.311347
	1.58031	5.96046e-05	26.6694	0.0512004	0.310093
	1.58365	0.000119209	26.0609	0.0544786	0.308842
	1.58698	0.000298023	25.4652	0.0578165	0.307587
	1.59031	0.000476837	24.8824	0.061214	0.306335
	1.59365	0.000715256	24.3124	0.0646114	0.30514
	1.59698	0.000953674	23.7556	0.0681281	0.303889
	1.60031	0.0013113	23.2117	0.0716448	0.302696
	1.60365	0.00166893	22.6809	0.0752211	0.301506
	1.60698	0.00208616	22.1632	0.0789166	0.300378
	1.61031	0.002563	21.6585	0.0827312	0.299306
	1.61365	0.00303984	21.1669	0.0866652	0.298298
	1.61698	0.00357628	20.6882	0.0907779	0.297284
	1.62031	0.00417233	20.2224	0.0950098	0.296269
	1.62365	0.00482798	19.7695	0.0994205	0.295192
	1.62698	0.00560284	19.3294	0.103891	0.294055
	1.63031	0.0064373	18.902	0.10848	0.292923
	1.63365	0.00733137	18.4875	0.11313	0.291723
	1.63698	0.00834465	18.0856	0.117838	0.290468
	1.64031	0.00941753	17.6965	0.122607	0.289096
	1.64365	0.0106096	17.3201	0.127494	0.287722
	1.64698	0.0118613	16.9564	0.132501	0.286295
	1.65031	0.0132918	16.6054	0.137687	0.284982
	1.65365	0.0148416	16.267	0.143051	0.283494
	1.65698	0.0165105	15.9413	0.148654	0.282188
	1.66031	0.0183582	15.6283	0.154555	0.280875
	1.66365	0.0204444	15.3278	0.160694	0.279507
	1.66698	0.022769	15.04	0.167131	0.278196
	1.67031	0.0253916	14.7647	0.173867	0.27695
	1.67365	0.0283122	14.5019	0.180781	0.275819
	1.67698	0.0316501	14.2516	0.187993	0.274566
	1.68031	0.0354052	14.0139	0.195384	0.273438
	1.68365	0.0396371	13.7886	0.203073	0.27237
	1.68698	0.0444055	13.5759	0.211	0.271298
	1.69031	0.0497103	13.3754	0.219226	0.270287
	1.69365	0.0556111	13.1874	0.227809	0.269335
	1.69698	0.062108	13.0118	0.23675	0.268442
	1.70031	0.0693202	12.8484	0.246048	0.267611
	1.70365	0.0771284	12.6973	0.255764	0.266773
	1.70698	0.0857115	12.5586	0.265896	0.26588
	1.71031	0.0950098	12.4322	0.276506	0.265046
	1.71365	0.105023	12.3181	0.287533	0.264206
	1.71698	0.115871	12.2164	0.299037	0.263252
	1.72031	0.127435	12.1272	0.311017	0.262296
	1.72365	0.139773	12.0505	0.323355	0.261281
	1.72698	0.152946	11.9865	0.33617	0.260266
	1.73031	0.166774	11.9352	0.349402	0.259249
	1.73365	0.181377	11.8967	0.362992	0.25818
	1.73698	0.196636	11.8709	0.376999	0.257228
	1.74031	0.21255	11.858	0.391364	0.256275
	1.74365	0.229001	11.8579	0.406086	0.255386
	1.74698	0.245988	11.8707	0.421107	0.254553
	1.75031	0.263393	11.8965	0.436485	0.25366
	1.75365	0.281274	11.9351	0.45222	0.252772
	1.75698	0.299513	11.9867	0.468373	0.251876
	1.76031	0.31811	12.0511	0.484884	0.250802
	1.76365	0.337064	12.1285	0.501752	0.249667
	1.76698	0.356376	12.2188	0.519097	0.248473
	1.77031	0.376046	12.3222	0.536799	0.247219
	1.77365	0.396132	12.4387	0.554919	0.245966
	1.77698	0.416696	12.5684	0.573397	0.244714
	1.78031	0.437677	12.7114	0.592232	0.243584
	1.78365	0.459075	12.8681	0.611365	0.242572
	1.78698	0.481009	13.0387	0.630736	0.24168
	1.79031	0.503361	13.2235	0.650406	0.24091
	1.79365	0.52613	13.423	0.670195	0.240315
	1.79698	0.549376	13.6374	0.690222	0.239778
	1.80031	0.573039	13.8671	0.710428	0.239182
	1.80365	0.59706	14.1127	0.730813	0.238646
	1.80698	0.621438	14.3744	0.751376	0.237989
	1.81031	0.646234	14.6526	0.772178	0.237208
	1.81365	0.671387	14.9474	0.793159	0.236256
	1.81698	0.696957	15.2591	0.814378	0.235304
	1.82031	0.722885	15.5879	0.835776	0.234233
	1.82365	0.74929	15.9337	0.857472	0.233162
	1.82698	0.776112	16.2964	0.879347	0.231972
	1.83031	0.803471	16.6759	0.901461	0.230843
	1.83365	0.831366	17.0718	0.923812	0.229715
	1.83698	0.859797	17.4839	0.946462	0.228704
	1.84031	0.888944	17.9118	0.96935	0.227687
	1.84365	0.918865	18.355	0.992596	0.226675
	1.84698	0.949562	18.8133	1.01614	0.225781
	1.85031	0.981212	19.2865	1.03998	0.224825
	1.85365	1.01388	19.775	1.06412	0.223929
	1.85698	1.04767	20.2793	1.08856	0.222914
	1.86031	1.0826	20.8009	1.1133	0.221899
	1.86365	1.11878	21.342	1.13821	0.220883
	1.86698	1.15627	21.906	1.16336	0.219751
	1.87031	1.19495	22.4975	1.18864	0.218679
	1.87365	1.23483	23.1228	1.21403	0.217603
	1.87698	1.27578	23.7903	1.23948	0.216528
	1.88031	1.31774	24.51	1.26505	0.215516
	1.88365	1.36042	25.2942	1.29074	0.214561
	1.88698	1.40363	26.1572	1.31643	0.21373
	1.89031	1.44714	27.1157	1.34224	0.213013
	1.89365	1.49047	28.1882	1.36817	0.21236
	1.89698	1.53345	29.3952	1.39409	0.211829
	1.90031	1.57547	30.7591	1.42014	0.21135
	1.90365	1.61624	32.3043	1.44625	0.210817
	1.90698	1.65522	34.0575	1.47247	0.21034
	1.91031	1.69182	36.0476	1.49876	0.209739
	1.91365	1.72561	38.3065	1.52516	0.20908
	1.91698	1.75601	40.8696	1.55175	0.208241
	1.92031	1.7826	43.7756	1.57839	0.207287
	1.92365	1.80483	47.0668	1.60527	0.206329
	1.92698	1.82241	50.788	1.63233	0.20519
	1.93031	1.83505	54.9843	1.65963	0.203996
	1.93365	1.8425	59.6978	1.68711	0.202748
	1.93698	1.84458	64.9623	1.71477	0.201496
	1.94031	1.84143	70.7974	1.7426	0.200251
	1.94365	1.83302	77.203	1.7705	0.199247
	1.94698	1.81949	84.1542	1.79845	0.198235
	1.95031	1.80101	91.5995	1.82641	0.197289
	1.95365	1.77801	99.4599	1.85418	0.196457
	1.95698	1.75071	107.633	1.88166	0.195684
	1.96031	1.71947	115.996	1.90878	0.194971
	1.96365	1.68478	124.418	1.93524	0.194255
	1.96698	1.64717	132.767	1.96087	0.193541
	1.97031	1.60706	140.918	1.98549	0.192823
	1.97365	1.56504	148.77	2.0088	0.192106
	1.97698	1.52165	156.243	2.03061	0.19145
	1.98031	1.47736	163.288	2.05058	0.190857
	1.98365	1.43272	169.884	2.06852	0.190379
	1.98698	1.38801	176.033	2.08414	0.189902
	1.99031	1.34379	181.759	2.09725	0.189487
	1.99365	1.30022	187.1	2.10774	0.189129
	1.99698	1.25766	192.102	2.11537	0.188772
	2.00031	1.21629	196.815	2.12002	0.188414
	2.00365	1.17624	201.289	2.12163	0.188056
	2.00698	1.13767	205.569	2.12014	0.18764
	2.01031	1.10078	209.695	2.11549	0.18716
	2.01365	1.06555	213.701	2.10768	0.186624
	2.01698	1.03211	217.617	2.09671	0.186089
	2.02031	1.00052	221.47	2.08265	0.185486
	2.02365	0.970781	225.281	2.06566	0.184772
	2.02698	0.942886	229.072	2.04575	0.184179
	2.03031	0.916839	232.86	2.02322	0.183523
	2.03365	0.89246	236.66	1.99813	0.182927
	2.03698	0.869811	240.486	1.97083	0.18227
	2.04031	0.848651	244.351	1.94144	0.181677
	2.04365	0.828862	248.265	1.91039	0.181143
	2.04698	0.810325	252.24	1.87784	0.180665
	2.05031	0.79304	256.283	1.84417	0.180191
	2.05365	0.776768	260.402	1.80972	0.179835
	2.05698	0.761509	264.605	1.77485	0.179418
	2.06031	0.747144	268.898	1.7398	0.179059
	2.06365	0.733614	273.286	1.70499	0.178705
	2.06698	0.720859	277.775	1.6706	0.178406
	2.07031	0.708938	282.373	1.63692	0.177988
	2.07365	0.697732	287.086	1.6042	0.177634
	2.07698	0.687182	291.921	1.57249	0.177214
	2.08031	0.677228	296.886	1.54197	0.176794
	2.08365	0.66787	301.99	1.51271	0.176321
	2.08698	0.658989	307.241	1.48469	0.176022
	2.09031	0.650465	312.648	1.45787	0.175664
	2.09365	0.642359	318.219	1.43224	0.175429
	2.09698	0.634611	323.963	1.4078	0.175307
	2.10031	0.6271	329.886	1.38456	0.175194
	2.10365	0.619888	335.996	1.36232	0.175374
	2.10698	0.612915	342.3	1.34122	0.175492
	2.11031	0.606239	348.804	1.32126	0.175736
	2.11365	0.599742	355.511	1.3023	0.176093
	2.11698	0.593603	362.424	1.28448	0.176446
	2.12031	0.587642	369.541	1.26773	0.176743
	2.12365	0.582039	376.857	1.25211	0.176979
	2.12698	0.576675	384.363	1.23763	0.177274
	2.13031	0.571668	392.043	1.22428	0.177447
	2.13365	0.567079	399.879	1.21212	0.177628
	2.13698	0.562847	407.844	1.20103	0.177985
	2.14031	0.559092	415.91	1.19108	0.178283
	2.14365	0.555754	424.048	1.18226	0.178762
	2.14698	0.552952	432.225	1.17457	0.179418
	2.15031	0.550568	440.411	1.16801	0.180201
	2.15365	0.548601	448.58	1.16265	0.181336
	2.15698	0.547111	456.711	1.15836	0.182589
	2.16031	0.545979	464.79	1.15526	0.184024
	2.16365	0.545144	472.812	1.15323	0.185695
	2.16698	0.544667	480.779	1.1524	0.187542
	2.17031	0.544488	488.702	1.15269	0.189512
	2.17365	0.544548	496.601	1.15418	0.191717
	2.17698	0.544906	504.501	1.15705	0.194099
	2.18031	0.545561	512.435	1.16163	0.19666
	2.18365	0.546575	520.44	1.16849	0.199459
	2.18698	0.548005	528.558	1.1785	0.202559
	2.19031	0.549912	536.833	1.19293	0.206136
	2.19365	0.552475	545.314	1.21361	0.210125
	2.19698	0.555634	554.051	1.24311	0.21454
	2.20031	0.559568	563.098	1.2849	0.219727
	2.20365	0.564218	572.508	1.34337	0.22557
	2.20698	0.569701	582.337	1.42407	0.232249
	2.21031	0.576019	592.641	1.53375	0.239755
	2.21365	0.583112	603.47	1.68061	0.24822
	2.21698	0.59104	614.869	1.87415	0.257698
	2.22031	0.599742	626.877	2.12491	0.268362
	2.22365	0.609159	639.518	2.44486	0.28016
	2.22698	0.619292	652.804	2.84654	0.293391
	2.23031	0.6302	666.732	3.34305	0.30805
	2.23365	0.641823	681.282	3.94738	0.324317
	2.23698	0.654221	696.416	4.67175	0.342199
	2.24031	0.667512	712.079	5.5272	0.361991
	2.24365	0.681758	728.203	6.52242	0.383626
	2.24698	0.696957	744.701	7.66337	0.40735
	2.25031	0.713289	761.473	8.95238	0.433167
	2.25365	0.730693	778.408	10.3876	0.461243
	2.25698	0.749409	795.383	11.9627	0.491643
	2.26031	0.769317	812.266	13.6664	0.524371
	2.26365	0.790596	828.921	15.483	0.559658
	2.26698	0.813186	845.21	17.3919	0.597566
	2.27031	0.837147	860.998	19.3686	0.638097
	2.27365	0.86236	876.16	21.3856	0.681609
	2.27698	0.888824	890.582	23.412	0.728218
	2.28031	0.916541	904.166	25.416	0.778103
	2.28365	0.94533	916.838	27.3646	0.831746
	2.28698	0.975192	928.544	29.2253	0.889561
	2.29031	1.00601	939.253	30.967	0.9522
	2.29365	1.0376	948.958	32.5605	1.02057
	2.29698	1.06978	957.671	33.9801	1.09603
	2.30031	1.10245	965.421	35.2037	1.18001
	2.30365	1.13541	972.252	36.214	1.27478
	2.30698	1.16837	978.222	36.9989	1.38314
	2.31031	1.20121	983.392	37.5517	1.50873
	2.31365	1.2337	987.831	37.8715	1.6562
	2.31698	1.26565	991.61	37.9627	1.8312
	2.32031	1.29688	994.801	37.8352	2.04077
	2.32365	1.32722	997.474	37.5034	2.29337
	2.32698	1.35654	999.698	36.9857	2.59891
	2.33031	1.38485	1001.54	36.3036	2.9687
	2.33365	1.41197	1003.05	35.4811	3.4158
	2.33698	1.43796	1004.29	34.5433	3.95438
	2.34031	1.46282	1005.32	33.5159	4.59972
	2.34365	1.48654	1006.16	32.4243	5.36809
	2.34698	1.50931	1006.85	31.293	6.27592
	2.35031	1.53118	1007.43	30.1451	7.33951
	2.35365	1.55252	1007.92	29.0017	8.57451
	2.35698	1.57356	1008.33	27.882	9.99507
	2.36031	1.59478	1008.68	26.8027	11.6137
	2.36365	1.6166	1008.97	25.7781	13.44
	2.36698	1.63954	1009.21	24.8201	15.481
	2.37031	1.66428	1009.4	23.9383	17.7397
	2.37365	1.69152	1009.54	23.1397	20.2159
	2.37698	1.72192	1009.63	22.4293	22.9051
	2.38031	1.75619	1009.68	21.8101	25.7989
	2.38365	1.79493	1009.68	21.2831	28.8854
	2.38698	1.83874	1009.65	20.8478	32.1487
	2.39031	1.88828	1009.59	20.5021	35.57
	2.39365	1.94377	1009.52	20.2428	39.1279
	2.39698	2.00576	1009.44	20.0657	42.799
	2.40031	2.07424	1009.38	19.9658	46.5586
	2.40365	2.1494	1009.35	19.9377	50.3813
	2.40698	2.23112	1009.38	19.9755	54.2422
	2.41031	2.31922	1009.49	20.0732	58.1166
	2.41365	2.41333	1009.7	20.2249	61.9819
	2.41698	2.51311	1010.03	20.4245	65.8172
	2.42031	2.61801	1010.5	20.6663	69.6042
	2.42365	2.72745	1011.13	20.9449	73.3276
	2.42698	2.84076	1011.93	21.255	76.9756
	2.43031	2.95722	1012.9	21.592	80.5399
	2.43365	3.0762	1014.05	21.9513	84.0162
	2.43698	3.1969	1015.37	22.3289	87.4043
	2.44031	3.31837	1016.84	22.7212	90.7083
	2.44365	3.43996	1018.44	23.1251	93.9365
	2.44698	3.56072	1020.16	23.5376	97.1014
	2.45031	3.67975	1021.96	23.9562	100.219
	2.45365	3.79622	1023.81	24.379	103.311
	2.45698	3.90929	1025.7	24.8041	106.401
	2.46031	4.01819	1027.58	25.2301	109.514
	2.46365	4.12214	1029.43	25.6559	112.681
	2.46698	4.22055	1031.24	26.0806	115.932
	2.47031	4.31293	1032.98	26.5038	119.299
	2.47365	4.399	1034.64	26.9253	122.814
	2.47698	4.47857	1036.2	27.3452	126.509
	2.48031	4.55159	1037.66	27.7641	130.413
	2.48365	4.61823	1039.02	28.1831	134.554
	2.48698	4.67873	1040.27	28.6034	138.957
	2.49031	4.73344	1041.42	29.0272	143.643
	2.49365	4.78292	1042.47	29.4569	148.627
	2.49698	4.82768	1043.43	29.8957	153.924
	2.50031	4.86839	1044.31	30.3475	159.54
	2.50365	4.9057	1045.11	30.8172	165.478
	2.50698	4.94039	1045.84	31.3101	171.736
	2.51031	4.97317	1046.51	31.8332	178.309
	2.51365	5.0047	1047.12	32.3944	185.185
	2.51698	5.03588	1047.68	33.003	192.352
	2.52031	5.06723	1048.19	33.6705	199.79
	2.52365	5.09953	1048.65	34.4101	207.48
	2.52698	5.13339	1049.06	35.2377	215.398
	2.53031	5.16933	1049.42	36.1719	223.519
	2.53365	5.20802	1049.73	37.2342	231.815
	2.53698	5.24992	1049.98	38.4493	240.257
	2.54031	5.29557	1050.18	39.8456	248.813
	2.54365	5.34552	1050.31	41.4543	257.452
	2.54698	5.40024	1050.37	43.31	266.139
	2.55031	5.46026	1050.37	45.45	274.841
	2.55365	5.52636	1050.29	47.9131	283.522
	2.55698	5.59902	1050.14	50.7396	292.147
	2.56031	5.67919	1049.92	53.9695	300.68
	2.56365	5.76752	1049.62	57.6413	309.087
	2.56698	5.8651	1049.24	61.7908	317.333
	2.57031	5.97274	1048.79	66.4489	325.383
	2.57365	6.09159	1048.26	71.6409	333.207
	2.57698	6.22267	1047.65	77.3841	340.775
	2.58031	6.36709	1046.96	83.6868	348.059
	2.58365	6.52593	1046.21	90.5476	355.036
	2.58698	6.70034	1045.37	97.954	361.684
	2.59031	6.89119	1044.48	105.882	367.987
	2.59365	7.09951	1043.52	114.297	373.931
	2.59698	7.32613	1042.5	123.153	379.506
	2.60031	7.57164	1041.42	132.392	384.706
	2.60365	7.83676	1040.31	141.948	389.528
	2.60698	8.12185	1039.15	151.747	393.972
	2.61031	8.4272	1037.97	161.707	398.043
	2.61365	8.753	1036.76	171.743	401.745
	2.61698	9.09913	1035.53	181.765	405.088
	2.62031	9.46546	1034.3	191.681	408.081
	2.62365	9.85163	1033.08	201.402	410.737
	2.62698	10.2571	1031.87	210.84	413.067
	2.63031	10.6812	1030.69	219.912	415.085
	2.63365	11.1228	1029.57	228.538	416.804
	2.63698	11.5811	1028.51	236.648	418.237
	2.64031	12.0546	1027.53	244.178	419.397
	2.64365	12.5417	1026.67	251.074	420.296
	2.64698	13.0406	1025.94	257.29	420.946
	2.65031	13.5494	1025.37	262.792	421.357
	2.65365	14.0657	1024.98	267.553	421.538
	2.65698	14.587	1024.79	271.56	421.499
	2.66031	15.1108	1024.82	274.805	421.247
	2.66365	15.6339	1025.09	277.292	420.789
	2.66698	16.1536	1025.62	279.034	420.133
	2.67031	16.6667	1026.4	280.048	419.285
	2.67365	17.1701	1027.45	280.362	418.25
	2.67698	17.6606	1028.76	280.005	417.035
	2.68031	18.1352	1030.31	279.012	415.644
	2.68365	18.5913	1032.11	277.421	414.084
	2.68698	19.026	1034.11	275.272	412.36
	2.69031	19.4371	1036.31	272.605	410.478
	2.69365	19.8225	1038.66	269.462	408.444
	2.69698	20.1807	1041.15	265.882	406.265
	2.70031	20.5103	1043.72	261.906	403.949
	2.70365	20.8104	1046.34	257.572	401.501
	2.70698	21.0806	1048.97	252.917	398.931
	2.71031	21.3209	1051.58	247.977	396.246
	2.71365	21.5317	1054.12	242.787	393.455
	2.71698	21.7135	1056.55	237.38	390.566
	2.72031	21.8673	1058.85	231.789	387.588
	2.72365	21.9943	1060.97	226.046	384.531
	2.72698	22.0957	1062.9	220.181	381.404
	2.73031	22.1732	1064.6	214.224	378.216
	2.73365	22.2279	1066.05	208.204	374.977
	2.73698	22.2616	1067.24	202.149	371.698
	2.74031	22.2754	1068.16	196.086	368.388
	2.74365	22.2709	1068.78	190.041	365.058
	2.74698	22.2493	1069.12	184.038	361.719
	2.75031	22.2117	1069.17	178.098	358.381
	2.75365	22.159	1068.94	172.244	355.055
	2.75698	22.0925	1068.42	166.494	351.754
	2.76031	22.0127	1067.64	160.864	348.489
	2.76365	21.9206	1066.59	155.371	345.272
	2.76698	21.8168	1065.31	150.027	342.115
	2.77031	21.7021	1063.79	144.843	339.03
	2.77365	21.577	1062.07	139.827	336.029
	2.77698	21.4422	1060.16	134.987	333.125
	2.78031	21.298	1058.07	130.328	330.33
	2.78365	21.1451	1055.84	125.853	327.654
	2.78698	20.984	1053.47	121.564	325.109
	2.79031	20.8151	1050.99	117.461	322.705
	2.79365	20.6389	1048.41	113.543	320.45
	2.79698	20.4561	1045.76	109.809	318.354
	2.80031	20.2672	1043.04	106.254	316.422
	2.80365	20.0729	1040.26	102.875	314.659
	2.80698	19.8739	1037.45	99.6665	313.071
	2.81031	19.6706	1034.61	96.6236	311.659
	2.81365	19.464	1031.74	93.7403	310.424
	2.81698	19.2546	1028.86	91.0107	309.365
	2.82031	19.0432	1025.96	88.4289	308.48
	2.82365	18.8306	1023.06	85.989	307.766
	2.82698	18.6176	1020.14	83.6852	307.216
	2.83031	18.4051	1017.23	81.512	306.825
	2.83365	18.194	1014.3	79.4643	306.585
	2.83698	17.9853	1011.38	77.537	306.488
	2.84031	17.7802	1008.48	75.7254	306.524
	2.84365	17.5802	1005.59	74.0251	306.683
	2.84698	17.3864	1002.74	72.4317	306.955
	2.85031	17.2009	999.959	70.9408	307.329
	2.85365	17.0253	997.276	69.5483	307.794
	2.85698	16.8618	994.729	68.2501	308.337
	2.86031	16.7128	992.364	67.0421	308.949
	2.86365	16.5808	990.227	65.92	309.616
	2.86698	16.4688	988.369	64.8796	310.327
	2.87031	16.38	986.834	63.9164	311.069
	2.87365	16.3179	985.66	63.0261	311.83
	2.87698	16.2863	984.877	62.2037	312.598
	2.88031	16.2894	984.496	61.4446	313.36
	2.88365	16.3316	984.515	60.7436	314.104
	2.88698	16.4174	984.913	60.0957	314.817
	2.89031	16.5519	985.646	59.4958	315.489
	2.89365	16.7399	986.655	58.9386	316.107
	2.89698	16.9865	987.861	58.4193	316.66
	2.90031	17.2969	989.17	57.9328	317.138
	2.90365	17.6758	990.476	57.4746	317.53
	2.90698	18.1279	991.661	57.0404	317.829
	2.91031	18.6578	992.603	56.6263	318.028
	2.91365	19.2693	993.18	56.2287	318.118
	2.91698	19.9659	993.27	55.8445	318.097
	2.92031	20.7505	992.761	55.4708	317.96
	2.92365	21.625	991.549	55.1053	317.705
	2.92698	22.5905	989.547	54.7456	317.333
	2.93031	23.6472	986.686	54.3901	316.844
	2.93365	24.794	982.916	54.0369	316.243
	2.93698	26.0286	978.208	53.6848	315.533
	2.94031	27.3474	972.557	53.3324	314.721
	2.94365	28.7455	965.977	52.9789	313.815
	2.94698	30.2163	958.505	52.6233	312.823
	2.95031	31.752	950.191	52.2651	311.758
	2.95365	33.343	941.105	51.9038	310.63
	2.95698	34.9784	931.326	51.5392	309.453
	2.96031	36.6459	920.942	51.1711	308.241
	2.96365	38.3321	910.049	50.7997	307.011
	2.96698	40.0221	898.742	50.4249	305.779
	2.97031	41.7007	887.118	50.047	304.564
	2.97365	43.3516	875.271	49.6665	303.384
	2.97698	44.9585	863.289	49.2837	302.258
	2.98031	46.505	851.254	48.8993	301.206
	2.98365	47.9754	839.241	48.5137	300.244
	2.98698	49.3544	827.315	48.1277	299.387
	2.99031	50.6281	815.532	47.7421	298.646
	2.99365	51.7837	803.94	47.3577	298.026
	2.99698	52.8104	792.577	46.9752	297.524
	3.00031	53.6991	781.472	46.5953	297.13
	3.00365	54.4426	770.648	46.2188	296.824
	3.00698	55.0361	760.121	45.8462	296.575
	3.01031	55.477	749.899	45.4782	296.343
	3.01365	55.7644	739.988	45.1153	296.082
	3.01698	55.8999	730.389	44.758	295.734
	3.02031	55.887	721.099	44.4068	295.241
	3.02365	55.7307	712.114	44.062	294.541
	3.02698	55.4378	703.427	43.7241	293.575
	3.03031	55.0165	695.03	43.3936	292.286
	3.03365	54.4758	686.915	43.0707	290.628
	3.03698	53.8262	679.071	42.7562	288.563
	3.04031	53.0781	671.488	42.4504	286.062
	3.04365	52.2428	664.154	42.1537	283.113
	3.04698	51.3316	657.058	41.8668	279.714
	3.05031	50.3559	650.188	41.5902	275.877
	3.05365	49.3265	643.532	41.3243	271.624
	3.05698	48.2543	637.076	41.0695	266.987
	3.06031	47.1493	630.808	40.826	262.008
	3.06365	46.0211	624.717	40.5936	256.732
	3.06698	44.8785	618.791	40.3721	251.21
	3.07031	43.7297	613.019	40.1608	245.495
	3.07365	42.5817	607.39	39.9588	239.64
	3.07698	41.4411	601.894	39.7646	233.695
	3.08031	40.3133	596.524	39.5769	227.712
	3.08365	39.2032	591.271	39.3939	221.734
	3.08698	38.1147	586.127	39.2137	215.804
	3.09031	37.051	581.086	39.0345	209.959
	3.09365	36.0144	576.141	38.8547	204.231
	3.09698	35.0069	571.286	38.6727	198.648
	3.10031	34.0297	566.515	38.4877	193.232
	3.10365	33.0834	561.823	38.2987	188.001
	3.10698	32.1684	557.206	38.1054	182.969
	3.11031	31.2845	552.657	37.9075	178.147
	3.11365	30.4313	548.174	37.7055	173.541
	3.11698	29.6082	543.751	37.4998	169.153
	3.12031	28.8142	539.386	37.291	164.984
	3.12365	28.0483	535.074	37.0801	161.034
	3.12698	27.3094	530.813	36.8677	157.297
	3.13031	26.5961	526.598	36.6548	153.768
	3.13365	25.9073	522.427	36.442	150.441
	3.13698	25.2417	518.297	36.2301	147.307
	3.14031	24.598	514.204	36.0197	144.359
	3.14365	23.9751	510.147	35.8112	141.586
	3.14698	23.372	506.124	35.6051	138.98
	3.15031	22.7876	502.131	35.4013	136.531
	3.15365	22.2212	498.168	35.2002	134.229
	3.15698	21.672	494.232	35.0019	132.065
	3.16031	21.1393	490.322	34.8064	130.029
	3.16365	20.6226	486.437	34.6135	128.113
	3.16698	20.1216	482.574	34.4236	126.307
	3.17031	19.636	478.734	34.2364	124.605
	3.17365	19.1653	474.914	34.0522	122.998
	3.17698	18.7097	471.113	33.8709	121.478
	3.18031	18.2688	467.328	33.6928	120.039
	3.18365	17.8427	463.559	33.5178	118.676
	3.18698	17.4313	459.802	33.3463	117.38
	3.19031	17.0346	456.056	33.1784	116.149
	3.19365	16.6527	452.319	33.0143	114.975
	3.19698	16.2856	448.587	32.8541	113.855
	3.20031	15.9333	444.859	32.6981	112.784
	3.20365	15.5957	441.131	32.5463	111.758
	3.20698	15.2729	437.402	32.3989	110.774
	3.21031	14.9646	433.668	32.2561	109.827
	3.21365	14.6708	429.928	32.1181	108.916
	3.21698	14.3913	426.179	31.9852	108.036
	3.22031	14.1259	422.42	31.8575	107.185
	3.22365	13.8745	418.647	31.7354	106.361
	3.22698	13.6367	414.861	31.6193	105.562
	3.23031	13.4122	411.058	31.5095	104.784
	3.23365	13.2006	407.238	31.4064	104.026
	3.23698	13.0016	403.398	31.3104	103.286
	3.24031	12.8148	399.538	31.222	102.562
	3.24365	12.6396	395.655	31.1416	101.853
	3.24698	12.4757	391.748	31.0695	101.157
	3.25031	12.3225	387.815	31.0063	100.473
	3.25365	12.1794	383.853	30.9525	99.8
	3.25698	12.046	379.86	30.9091	99.1363
	3.26031	11.9216	375.834	30.8769	98.4811
	3.26365	11.8055	371.772	30.8573	97.8338
	3.26698	11.6972	367.671	30.8518	97.1938
	3.27031	11.596	363.527	30.8628	96.5603
	3.27365	11.5011	359.339	30.8926	95.9331
	3.27698	11.4119	355.103	30.9443	95.3116
	3.28031	11.3276	350.817	31.0214	94.6958
	3.28365	11.2474	346.478	31.1277	94.0853
	3.28698	11.1706	342.083	31.2672	93.48
	3.29031	11.0965	337.632	31.4441	92.8798
	3.29365	11.0244	333.12	31.6624	92.2848
	3.29698	10.9535	328.548	31.9256	91.6948
	3.30031	10.8832	323.912	32.2363	91.1099
	3.30365	10.8131	319.211	32.5966	90.5301
	3.30698	10.7424	314.442	33.0067	89.9552
	3.31031	10.6709	309.605	33.4658	89.3853
	3.31365	10.5981	304.696	33.9713	88.8202
	3.31698	10.5236	299.713	34.519	88.2599
	3.32031	10.4471	294.655	35.1035	87.7042
	3.32365	10.3685	289.519	35.7176	87.1531
	3.32698	10.2874	284.301	36.353	86.6064
	3.33031	10.2038	278.999	37.0004	86.064
	3.33365	10.1175	273.61	37.6493	85.5256
	3.33698	10.0286	268.129	38.289	84.991
	3.34031	9.93699	262.554	38.9075	84.4601
	3.34365	9.84275	256.881	39.4925	83.9326
	3.34698	9.7459	251.106	40.0317	83.4081
	3.35031	9.64659	245.227	40.5123	82.8865
	3.35365	9.54497	239.241	40.9217	82.3673
	3.35698	9.44126	233.147	41.2485	81.8504
	3.36031	9.33558	226.946	41.4822	81.3355
	3.36365	9.22823	220.64	41.6141	80.8225
	3.36698	9.11945	214.235	41.6381	80.3109
	3.37031	9.00942	207.737	41.5508	79.8008
	3.37365	8.89838	201.157	41.3519	79.292
	3.37698	8.78674	194.507	41.0439	78.7843
	3.38031	8.67462	187.802	40.6329	78.2777
	3.38365	8.56239	181.059	40.127	77.7721
	3.38698	8.45027	174.299	39.5366	77.2673
	3.39031	8.33851	167.541	38.8734	76.7636
	3.39365	8.22735	160.807	38.15	76.2609
	3.39698	8.11702	154.117	37.3788	75.7591
	3.40031	8.00771	147.493	36.5719	75.2584
	3.40365	7.8997	140.955	35.7403	74.7589
	3.40698	7.79313	134.523	34.8939	74.2606
	3.41031	7.68816	128.215	34.0415	73.7638
	3.41365	7.58499	122.05	33.1903	73.2684
	3.41698	7.48366	116.045	32.3463	72.7747
	3.42031	7.3843	110.218	31.5143	72.2827
	3.42365	7.28709	104.586	30.6983	71.7926
	3.42698	7.19202	99.1635	29.9014	71.3046
	3.43031	7.09921	93.9672	29.126	70.8186
	3.43365	7.00867	89.0105	28.3741	70.335
	3.43698	6.92046	84.3051	27.6471	69.8535
	3.44031	6.83451	79.8603	26.9461	69.3744
	3.44365	6.75088	75.6823	26.2721	68.8978
	3.44698	6.66946	71.7738	25.6255	68.4237
	3.45031	6.59019	68.1344	25.0063	67.9522
	3.45365	6.513	64.7597	24.4145	67.4835
	3.45698	6.43784	61.6425	23.8497	67.0173
	3.46031	6.36446	58.7726	23.3111	66.554
	3.46365	6.29282	56.1375	22.7976	66.0936
	3.46698	6.22278	53.7229	22.3081	65.6361
	3.47031	6.1543	51.5136	21.841	65.1816
	3.47365	6.08718	49.4934	21.395	64.7302
	3.47698	6.02132	47.6468	20.9681	64.2818
	3.48031	5.95665	45.9577	20.5587	63.8367
	3.48365	5.89305	44.4117	20.1643	63.3949
	3.48698	5.83047	42.9943	19.783	62.9564
	3.49031	5.76872	41.693	19.412	62.5215
	3.49365	5.7078	40.4958	19.0488	62.0901
	3.49698	5.64754	39.3922	18.6903	61.6624
	3.50031	5.58794	38.3729	18.3336	61.2384
	3.50365	5.52881	37.4295	17.9754	60.8183
	3.50698	5.47022	36.5545	17.6128	60.4022
	3.51031	5.41204	35.7413	17.2427	59.9901
	3.51365	5.35423	34.9842	16.8625	59.5822
	3.51698	5.29671	34.2779	16.47	59.1785
	3.52031	5.23955	33.6178	16.0636	58.7792
	3.52365	5.18268	32.9997	15.642	58.3842
	3.52698	5.12612	32.4199	15.2048	57.9936
	3.53031	5.06991	31.875	14.752	57.6076
	3.53365	5.01406	31.3618	14.2843	57.2262
	3.53698	4.95863	30.8777	13.8031	56.8493
	3.54031	4.90379	30.4201	13.3102	56.4773
	3.54365	4.84961	29.9867	12.8079	56.1101
	3.54698	4.79615	29.5753	12.2991	55.7477
	3.55031	4.74358	29.184	11.7869	55.3902
	3.55365	4.69202	28.8109	11.2747	55.0379
	3.55698	4.64147	28.4542	10.7663	54.6907
	3.56031	4.59206	28.1126	10.2653	54.3486
	3.56365	4.54378	27.7843	9.7754	54.0118
	3.56698	4.49675	27.4683	9.30023	53.6803
	3.57031	4.45086	27.1631	8.84289	53.354
	3.57365	4.40621	26.8677	8.40634	53.033
	3.57698	4.3627	26.581	7.99298	52.7175
	3.58031	4.32038	26.3023	7.60472	52.4073
	3.58365	4.27932	26.0304	7.2428	52.1026
	3.58698	4.23938	25.7646	6.90818	51.8033
	3.59031	4.20064	25.5042	6.6011	51.5097
	3.59365	4.16309	25.2483	6.32131	51.2216
	3.59698	4.12673	24.9963	6.06817	50.9393
	3.60031	4.09156	24.7476	5.84066	50.6628
	3.60365	4.05747	24.5017	5.63753	50.3922
	3.60698	4.02451	24.258	5.45716	50.1276
	3.61031	3.9925	24.0164	5.29802	49.8692
	3.61365	3.96144	23.7765	5.15842	49.6169
	3.61698	3.93122	23.5381	5.03671	49.3709
	3.62031	3.90172	23.3009	4.93115	49.1313
	3.62365	3.87287	23.0651	4.84037	48.8982
	3.62698	3.84456	22.8305	4.76289	48.6716
	3.63031	3.81672	22.597	4.69726	48.4516
	3.63365	3.78931	22.3645	4.64243	48.2383
	3.63698	3.76236	22.1331	4.59707	48.0316
	3.64031	3.73578	21.9028	4.56029	47.8318
	3.64365	3.70961	21.6735	4.53097	47.6388
	3.64698	3.68398	21.4452	4.50832	47.4525
	3.65031	3.65883	21.2181	4.49151	47.273
	3.65365	3.63427	20.992	4.47983	47.1003
	3.65698	3.61025	20.767	4.47261	46.9343
	3.66031	3.58683	20.5433	4.46928	46.775
	3.66365	3.56406	20.3208	4.46928	46.6222
	3.66698	3.54183	20.0996	4.47202	46.4759
	3.67031	3.52019	19.8798	4.47708	46.3359
	3.67365	3.49909	19.6614	4.48382	46.202
	3.67698	3.47871	19.4445	4.49181	46.0741
	3.68031	3.45892	19.2291	4.50045	45.952
	3.68365	3.4399	19.0154	4.50921	45.8353
	3.68698	3.42166	18.8035	4.51767	45.724
	3.69031	3.40426	18.5934	4.5253	45.6177
	3.69365	3.38787	18.3851	4.53174	45.5161
	3.69698	3.37255	18.1786	4.53663	45.419
	3.70031	3.35836	17.974	4.53979	45.3257
	3.70365	3.34531	17.7712	4.54098	45.2363
	3.70698	3.33363	17.5704	4.54009	45.1502
	3.71031	3.3232	17.3714	4.53693	45.067
	3.71365	3.31408	17.1743	4.53144	44.9864
	3.71698	3.30639	16.9792	4.52352	44.9078
	3.72031	3.30013	16.786	4.51314	44.831
	3.72365	3.29524	16.5951	4.50033	44.7555
	3.72698	3.29179	16.4065	4.48501	44.681
	3.73031	3.2897	16.2205	4.46719	44.607
	3.73365	3.28898	16.0373	4.44698	44.5332
	3.73698	3.28964	15.8571	4.42445	44.4595
	3.74031	3.29155	15.6801	4.39966	44.3854
	3.74365	3.29471	15.5066	4.37272	44.3105
	3.74698	3.299	15.3367	4.34363	44.2346
	3.75031	3.30436	15.1705	4.31263	44.1574
	3.75365	3.31074	15.0082	4.27979	44.0786
	3.75698	3.31795	14.85	4.24516	43.998
	3.76031	3.32594	14.6959	4.20892	43.9154
	3.76365	3.33458	14.5461	4.17107	43.8306
	3.76698	3.3437	14.4006	4.13185	43.7434
	3.77031	3.35324	14.2597	4.09144	43.6536
	3.77365	3.36295	14.1236	4.04996	43.5614
	3.77698	3.37273	13.9923	4.00758	43.4666
	3.78031	3.38244	13.8662	3.96442	43.369
	3.78365	3.39198	13.7454	3.92073	43.269
	3.78698	3.40116	13.6302	3.87657	43.1663
	3.79031	3.40992	13.5206	3.8321	43.0611
	3.79365	3.41827	13.4168	3.7874	42.9533
	3.79698	3.42602	13.3188	3.74264	42.8432
	3.80031	3.43311	13.2264	3.69781	42.7307
	3.80365	3.43961	13.1397	3.65311	42.6161
	3.80698	3.44545	13.0584	3.60864	42.4995
	3.81031	3.45051	12.9821	3.56454	42.381
	3.81365	3.45492	12.9106	3.52091	42.2611
	3.81698	3.45862	12.8433	3.47799	42.1396
	3.82031	3.4616	12.7799	3.43597	42.017
	3.82365	3.46386	12.7199	3.3949	41.8935
	3.82698	3.46547	12.6628	3.35503	41.7692
	3.83031	3.46643	12.6081	3.3164	41.6444
	3.83365	3.46684	12.5555	3.27897	41.5192
	3.83698	3.46667	12.5045	3.24285	41.3939
	3.84031	3.46595	12.4546	3.20786	41.2688
	3.84365	3.4647	12.4057	3.17389	41.1439
	3.84698	3.46297	12.3572	3.14075	41.0198
	3.85031	3.46071	12.3088	3.10832	40.8965
	3.85365	3.45784	12.2601	3.07631	40.7743
	3.85698	3.45451	12.2107	3.04461	40.6536
	3.86031	3.45051	12.1604	3.01313	40.5344
	3.86365	3.44592	12.1087	2.98184	40.4171
	3.86698	3.44074	12.0554	2.95079	40.3017
	3.87031	3.43484	12.0002	2.92009	40.1885
	3.87365	3.42828	11.9428	2.88975	40.0776
	3.87698	3.42113	11.8831	2.86001	39.9692
	3.88031	3.41338	11.8208	2.83098	39.8635
	3.88365	3.40503	11.7558	2.80279	39.7606
	3.88698	3.39609	11.6877	2.77549	39.6608
	3.89031	3.38674	11.6165	2.7492	39.5642
	3.89365	3.3769	11.542	2.72387	39.4712
	3.89698	3.36665	11.4639	2.69961	39.3817
	3.90031	3.35604	11.3821	2.67625	39.2961
	3.90365	3.34507	11.2965	2.65378	39.2144
	3.90698	3.33375	11.207	2.63208	39.1365
	3.91031	3.32218	11.1136	2.61116	39.0627
	3.91365	3.31038	11.0163	2.59095	38.9931
	3.91698	3.29828	10.9153	2.57134	38.9274
	3.92031	3.28606	10.8107	2.55233	38.8659
	3.92365	3.27367	10.7027	2.53385	38.8085
	3.92698	3.26109	10.5916	2.51585	38.7554
	3.93031	3.24839	10.4775	2.49833	38.7065
	3.93365	3.23558	10.3611	2.4811	38.6619
	3.93698	3.22264	10.2425	2.46429	38.6217
	3.94031	3.20959	10.1221	2.44778	38.586
	3.94365	3.19642	10.0005	2.43145	38.5547
	3.94698	3.18313	9.87822	2.4153	38.528
	3.95031	3.16972	9.75567	2.39909	38.506
	3.95365	3.15624	9.63342	2.38281	38.4884
	3.95698	3.14265	9.51195	2.36636	38.4756
	3.96031	3.12901	9.39173	2.3495	38.4672
	3.96365	3.11536	9.27317	2.33215	38.4635
	3.96698	3.10165	9.15664	2.31421	38.4644
	3.97031	3.08794	9.04244	2.29567	38.4698
	3.97365	3.07429	8.93068	2.27636	38.4797
	3.97698	3.06058	8.82167	2.25639	38.4943
	3.98031	3.04687	8.71551	2.23577	38.5133
	3.98365	3.03316	8.61222	2.21455	38.5369
	3.98698	3.01939	8.5119	2.1928	38.5649
	3.99031	3.00556	8.41463	2.17062	38.5974
	3.99365	2.99174	8.32033	2.14809	38.6343
	3.99698	2.97779	8.22896	2.12538	38.6755
	4.00031	2.96378	8.1405	2.10255	38.7211
	4.00365	2.94971	8.05479	2.07973	38.771
	4.00698	2.93559	7.97164	2.05708	38.825
	4.01031	2.92128	7.89088	2.03466	38.8833
	4.01365	2.90692	7.8122	2.01261	38.9456
	4.01698	2.89237	7.73531	1.99091	39.012
	4.02031	2.87765	7.66003	1.96975	39.0821
	4.02365	2.86275	7.58594	1.94907	39.1559
	4.02698	2.84767	7.51287	1.92899	39.2332
	4.03031	2.83247	7.44045	1.90943	39.3138
	4.03365	2.81709	7.36856	1.89054	39.3976
	4.03698	2.8016	7.29692	1.8723	39.4842
	4.04031	2.78598	7.22539	1.85484	39.5735
	4.04365	2.7703	7.15375	1.83827	39.6654
	4.04698	2.75451	7.08199	1.82277	39.7597
	4.05031	2.73865	7.00992	1.80858	39.8562
	4.05365	2.72268	6.93756	1.79601	39.9546
	4.05698	2.70653	6.86479	1.7854	40.055
	4.06031	2.6902	6.79153	1.77699	40.1571
	4.06365	2.67375	6.71786	1.77115	40.2607
	4.06698	2.657	6.64365	1.76805	40.3657
	4.07031	2.64007	6.56891	1.76805	40.4719
	4.07365	2.62284	6.49369	1.77127	40.5791
	4.07698	2.60544	6.41793	1.77795	40.6872
	4.08031	2.5878	6.34164	1.78814	40.7959
	4.08365	2.57009	6.26481	1.80197	40.9051
	4.08698	2.55227	6.18744	1.81949	41.0147
	4.09031	2.53439	6.1096	1.84071	41.1243
	4.09365	2.51657	6.03133	1.86557	41.234
	4.09698	2.49881	5.95266	1.894	41.3435
	4.10031	2.48122	5.87368	1.92595	41.4527
	4.10365	2.46388	5.79458	1.96123	41.5616
	4.10698	2.44677	5.71549	1.99962	41.6702
	4.11031	2.43002	5.63669	2.04086	41.7783
	4.11365	2.41357	5.55831	2.08461	41.8862
	4.11698	2.39754	5.48077	2.13051	41.9937
	4.12031	2.38186	5.40417	2.17819	42.1009
	4.12365	2.36666	5.32877	2.22719	42.208
	4.12698	2.35194	5.25486	2.27708	42.315
	4.13031	2.33769	5.18245	2.32738	42.422
	4.13365	2.32404	5.11175	2.37775	42.5292
	4.13698	2.31105	5.04279	2.42764	42.6366
	4.14031	2.29871	4.97556	2.47669	42.7445
	4.14365	2.28709	4.91017	2.52455	42.8527
	4.14698	2.27624	4.84651	2.57075	42.9615
	4.15031	2.26629	4.78452	2.61503	43.0709
	4.15365	2.25723	4.72432	2.65718	43.1809
	4.15698	2.24906	4.66579	2.69693	43.2916
	4.16031	2.24203	4.60899	2.73412	43.4028
	4.16365	2.23607	4.55385	2.7687	43.5146
	4.16698	2.23142	4.50033	2.80052	43.6268
	4.17031	2.22814	4.44841	2.82967	43.7392
	4.17365	2.22635	4.39805	2.85602	43.8517
	4.17698	2.22617	4.34911	2.87956	43.964
	4.18031	2.22772	4.30161	2.90036	44.0758
	4.18365	2.23094	4.25535	2.91836	44.1868
	4.18698	2.23601	4.21029	2.93362	44.2964
	4.19031	2.24292	4.16619	2.94596	44.4044
	4.19365	2.25168	4.12297	2.95538	44.5102
	4.19698	2.26223	4.08047	2.96175	44.6134
	4.20031	2.27463	4.03869	2.96509	44.7133
	4.20365	2.28888	3.99745	2.96521	44.8093
	4.20698	2.30497	3.95668	2.96199	44.901
	4.21031	2.32297	3.91632	2.95532	44.9877
	4.21365	2.34276	3.87627	2.94507	45.0687
	4.21698	2.3644	3.83639	2.93106	45.1436
	4.22031	2.38776	3.79658	2.91318	45.2119
	4.22365	2.41286	3.75676	2.89136	45.2728
	4.22698	2.43956	3.71695	2.86537	45.3258
	4.23031	2.46775	3.67701	2.83527	45.3705
	4.23365	2.49732	3.6369	2.80094	45.4063
	4.23698	2.52801	3.59666	2.76238	45.4328
	4.24031	2.55978	3.55619	2.7197	45.4497
	4.24365	2.59238	3.5156	2.67297	45.4566
	4.24698	2.62564	3.47489	2.62237	45.4532
	4.25031	2.65938	3.43412	2.56824	45.4393
	4.25365	2.69347	3.39323	2.51085	45.4149
	4.25698	2.72769	3.35217	2.45047	45.3797
	4.26031	2.76184	3.31092	2.38758	45.3336
	4.26365	2.7957	3.26943	2.32261	45.2767
	4.26698	2.82902	3.22765	2.25592	45.2089
	4.27031	2.86168	3.18551	2.18803	45.1303
	4.27365	2.89333	3.14313	2.1193	45.0409
	4.27698	2.92385	3.10057	2.05022	44.9408
	4.28031	2.95299	3.0579	1.98114	44.8303
	4.28365	2.98059	3.01534	1.91242	44.7093
	4.28698	3.00634	2.97308	1.84435	44.5782
	4.29031	3.03018	2.9313	1.77729	44.4373
	4.29365	3.05194	2.89011	1.71131	44.2868
	4.29698	3.07149	2.84976	1.64676	44.1269
	4.30031	3.08865	2.81024	1.5837	43.958
	4.30365	3.10344	2.77162	1.52236	43.7804
	4.30698	3.11571	2.73401	1.46288	43.5942
	4.31031	3.12555	2.69723	1.40536	43.3999
	4.31365	3.13294	2.66135	1.34999	43.1976
	4.31698	3.13795	2.6263	1.29682	42.9878
	4.32031	3.14069	2.59203	1.24598	42.7705
	4.32365	3.14122	2.55853	1.1974	42.5462
	4.32698	3.13973	2.52581	1.15126	42.3149
	4.33031	3.13646	2.49386	1.10745	42.0773
	4.33365	3.13157	2.46263	1.06609	41.8335
	4.33698	3.12531	2.43217	1.02711	41.5837
	4.34031	3.11792	2.40242	0.990391	41.3283
	4.34365	3.10969	2.37352	0.955939	41.0676
	4.34698	3.10087	2.34532	0.923753	40.8018
	4.35031	3.09181	2.31791	0.893652	40.5312
	4.35365	3.08269	2.29114	0.865579	40.2561
	4.35698	3.07387	2.26498	0.839591	39.9768
	4.36031	3.06553	2.23947	0.815451	39.6933
	4.36365	3.05796	2.21443	0.793099	39.4061
	4.36698	3.05134	2.18993	0.772536	39.1152
	4.37031	3.04586	2.16585	0.753641	38.8209
	4.37365	3.04151	2.14219	0.736356	38.5237
	4.37698	3.03847	2.11906	0.72068	38.2234
	4.38031	3.03662	2.09641	0.706613	37.9208
	4.38365	3.03596	2.07442	0.694096	37.6158
	4.38698	3.03644	2.05308	0.683188	37.3089
	4.39031	3.03781	2.03246	0.673771	37.0002
	4.39365	3.04002	2.01255	0.665963	36.6901
	4.39698	3.0427	1.99348	0.659585	36.3788
	4.40031	3.04568	1.97518	0.654578	36.0666
	4.40365	3.04866	1.95765	0.650942	35.7535
	4.40698	3.0514	1.94085	0.648439	35.4398
	4.41031	3.05361	1.92475	0.647068	35.1259
	4.41365	3.05498	1.90932	0.646651	34.8118
	4.41698	3.05533	1.89453	0.647008	34.4979
	4.42031	3.05432	1.88041	0.647962	34.1843
	4.42365	3.05182	1.86688	0.649512	33.8713
	4.42698	3.04765	1.854	0.651419	33.559
	4.43031	3.04174	1.84166	0.653744	33.2476
	4.43365	3.034	1.8298	0.656307	32.9372
	4.43698	3.0244	1.81848	0.659168	32.6281
	4.44031	3.01301	1.80757	0.662327	32.3203
	4.44365	2.99984	1.79702	0.665724	32.0138
	4.44698	2.985	1.78671	0.66936	31.7088
	4.45031	2.96861	1.7767	0.673294	31.4055
	4.45365	2.95079	1.76686	0.677407	31.1039
	4.45698	2.93171	1.75709	0.681698	30.804
	4.46031	2.91151	1.74749	0.686169	30.5063
	4.46365	2.89035	1.73789	0.690639	30.2106
	4.46698	2.86841	1.7283	0.695109	29.9173
	4.47031	2.84582	1.71876	0.699461	29.6265
	4.47365	2.8227	1.70916	0.703633	29.3383
	4.47698	2.79921	1.69957	0.707626	29.0529
	4.48031	2.77543	1.68991	0.711322	28.7704
	4.48365	2.75147	1.6802	0.714779	28.4908
	4.48698	2.72739	1.6703	0.717998	28.2142
	4.49031	2.70337	1.66029	0.720978	27.9406
	4.49365	2.67929	1.65004	0.72366	27.6701
	4.49698	2.65533	1.63949	0.726104	27.4026
	4.50031	2.63155	1.62864	0.728369	27.1381
	4.50365	2.60788	1.61743	0.730336	26.8767
	4.50698	2.58446	1.60593	0.732064	26.6183
	4.51031	2.56133	1.59413	0.733495	26.363
	4.51365	2.53844	1.58215	0.734568	26.1109
	4.51698	2.51591	1.56999	0.735343	25.8621
	4.52031	2.4938	1.55777	0.73576	25.6165
	4.52365	2.47204	1.54549	0.735819	25.3744
	4.52698	2.4507	1.53327	0.735402	25.1357
	4.53031	2.42972	1.52105	0.734568	24.9004
	4.53365	2.40922	1.50889	0.733256	24.6686
	4.53698	2.38907	1.49673	0.731409	24.4401
	4.54031	2.36928	1.48457	0.729024	24.2149
	4.54365	2.34991	1.47247	0.726044	23.993
	4.54698	2.3309	1.46037	0.722468	23.7741
	4.55031	2.31236	1.44839	0.718236	23.5583
	4.55365	2.29424	1.43647	0.713468	23.3457
	4.55698	2.27654	1.42479	0.708103	23.136
	4.56031	2.25943	1.41335	0.702262	22.9294
	4.56365	2.24286	1.40232	0.696003	22.7259
	4.56698	2.22695	1.39171	0.689447	22.5254
	4.57031	2.21157	1.38164	0.682652	22.3278
	4.57365	2.19685	1.37216	0.675678	22.1333
	4.57698	2.18284	1.36328	0.668585	21.9417
	4.58031	2.16943	1.35505	0.661373	21.7528
	4.58365	2.15673	1.34766	0.654161	21.5669
	4.58698	2.14469	1.34104	0.646889	21.3835
	4.59031	2.13343	1.33526	0.639617	21.2027
	4.59365	2.12294	1.33038	0.632346	21.0246
	4.59698	2.11316	1.32638	0.625014	20.849
	4.60031	2.10428	1.32328	0.617683	20.6758
	4.60365	2.0963	1.3212	0.610352	20.505
	4.60698	2.08914	1.32	0.60302	20.3368
	4.61031	2.08288	1.31971	0.595629	20.171
	4.61365	2.07764	1.3203	0.588298	20.0076
	4.61698	2.07329	1.32167	0.580907	19.8465
	4.62031	2.06989	1.32376	0.573456	19.6879
	4.62365	2.06757	1.32638	0.565946	19.5315
	4.62698	2.06631	1.32936	0.558376	19.3773
	4.63031	2.06614	1.33258	0.550807	19.2253
	4.63365	2.06715	1.3358	0.543177	19.0755
	4.63698	2.06941	1.33878	0.535548	18.9277
	4.64031	2.07293	1.34134	0.527918	18.782
	4.64365	2.07776	1.34343	0.520289	18.6383
	4.64698	2.0839	1.34492	0.512779	18.4966
	4.65031	2.09135	1.34581	0.505328	18.3569
	4.65365	2.10017	1.34605	0.497997	18.2191
	4.65698	2.1103	1.34587	0.490785	18.0831
	4.66031	2.12169	1.34528	0.483692	17.949
	4.66365	2.13444	1.34444	0.476837	17.8167
	4.66698	2.14845	1.34337	0.470102	17.6862
	4.67031	2.16377	1.34218	0.463605	17.5574
	4.67365	2.18034	1.34081	0.457287	17.4302
	4.67698	2.19804	1.33926	0.451207	17.3047
	4.68031	2.21694	1.33747	0.445247	17.1807
	4.68365	2.2369	1.33526	0.439525	17.0584
	4.68698	2.25788	1.33264	0.433981	16.9376
	4.69031	2.2797	1.32948	0.428557	16.8183
	4.69365	2.30241	1.32567	0.423372	16.7007
	4.69698	2.32571	1.32114	0.418425	16.5847
	4.70031	2.34967	1.31589	0.413716	16.4703
	4.70365	2.37399	1.30987	0.409186	16.3575
	4.70698	2.39873	1.30314	0.404894	16.2463
	4.71031	2.42364	1.29569	0.400841	16.1368
	4.71365	2.44862	1.28752	0.396967	16.0288
	4.71698	2.47359	1.27876	0.393271	15.9222
	4.72031	2.49833	1.26928	0.389695	15.8173
	4.72365	2.52265	1.25927	0.386178	15.7139
	4.72698	2.54649	1.24872	0.382662	15.612
	4.73031	2.56968	1.23769	0.379086	15.5114
	4.73365	2.59209	1.22631	0.375509	15.4123
	4.73698	2.61354	1.21462	0.371873	15.3146
	4.74031	2.63399	1.20258	0.368357	15.2182
	4.74365	2.65318	1.19036	0.36484	15.1234
	4.74698	2.67112	1.17797	0.361502	15.0299
	4.75031	2.68769	1.16545	0.358224	14.9379
	4.75365	2.70271	1.15299	0.355184	14.8473
	4.75698	2.71612	1.14053	0.352263	14.7581
	4.76031	2.72781	1.1282	0.349581	14.6703
	4.76365	2.73764	1.11616	0.347018	14.584
	4.76698	2.74551	1.10453	0.344574	14.499
	4.77031	2.75135	1.09345	0.34225	14.4154
	4.77365	2.75522	1.08308	0.339985	14.333
	4.77698	2.75707	1.07348	0.33778	14.2519
	4.78031	2.75695	1.06484	0.335634	14.1721
	4.78365	2.75493	1.05715	0.333548	14.0934
	4.78698	2.75099	1.05047	0.331521	14.0161
	4.79031	2.74521	1.04481	0.329554	13.94
	4.79365	2.73776	1.04016	0.327587	13.865
	4.79698	2.72864	1.03647	0.32568	13.7913
	4.80031	2.71791	1.0336	0.323832	13.7188
	4.80365	2.70563	1.03152	0.321984	13.6475
	4.80698	2.69186	1.03009	0.320196	13.5774
	4.81031	2.67667	1.02931	0.318468	13.5084
	4.81365	2.6601	1.02919	0.316858	13.4406
	4.81698	2.64227	1.02955	0.315368	13.3739
	4.82031	2.62332	1.03056	0.313938	13.3084
	4.82365	2.60329	1.03211	0.312626	13.244
	4.82698	2.58237	1.03432	0.311434	13.1809
	4.83031	2.56062	1.03706	0.310361	13.1188
	4.83365	2.53826	1.0404	0.309348	13.058
	4.83698	2.51544	1.04433	0.308335	12.9983
	4.84031	2.49219	1.04886	0.307381	12.9397
	4.84365	2.46871	1.05387	0.306427	12.8824
	4.84698	2.4451	1.05929	0.305474	12.8261
	4.85031	2.42144	1.06508	0.30458	12.7708
	4.85365	2.39784	1.07104	0.303626	12.7167
	4.85698	2.37429	1.07718	0.302732	12.6636
	4.86031	2.35087	1.08337	0.301838	12.6115
	4.86365	2.32762	1.08951	0.301003	12.5604
	4.86698	2.30461	1.09547	0.300169	12.5104
	4.87031	2.2819	1.1012	0.299335	12.4613
	4.87365	2.25943	1.10662	0.29856	12.4134
	4.87698	2.23732	1.11163	0.297785	12.3664
	4.88031	2.21556	1.11616	0.297129	12.3204
	4.88365	2.19423	1.12009	0.296533	12.2756
	4.88698	2.17336	1.12337	0.296056	12.2318
	4.89031	2.15304	1.12587	0.295699	12.1891
	4.89365	2.13319	1.12754	0.29552	12.1475
	4.89698	2.11388	1.12826	0.29546	12.1071
	4.90031	2.09522	1.12796	0.29552	12.0678
	4.90365	2.07704	1.12671	0.295639	12.0295
	4.90698	2.05946	1.12438	0.295818	11.9923
	4.91031	2.04241	1.12104	0.295937	11.9561
	4.91365	2.02596	1.11669	0.295997	11.9208
	4.91698	2.00999	1.11145	0.295997	11.8864
	4.92031	1.99455	1.10531	0.295818	11.8527
	4.92365	1.97953	1.09833	0.295639	11.8199
	4.92698	1.96505	1.09071	0.295401	11.7877
	4.93031	1.95104	1.08236	0.295162	11.7562
	4.93365	1.93745	1.07342	0.294983	11.7254
	4.93698	1.92434	1.06388	0.294924	11.6952
	4.94031	1.9117	1.05381	0.294983	11.6655
	4.94365	1.89948	1.04314	0.295281	11.6364
	4.94698	1.88774	1.03199	0.295699	11.6076
	4.95031	1.87641	1.02037	0.296295	11.5795
	4.95365	1.86551	1.00839	0.29701	11.5517
	4.95698	1.85508	0.996053	0.297844	11.5243
	4.96031	1.845	0.983477	0.298679	11.4971
	4.96365	1.83529	0.970662	0.299573	11.4703
	4.96698	1.82593	0.957727	0.300527	11.4435
	4.97031	1.81693	0.944734	0.301421	11.4171
	4.97365	1.80823	0.93174	0.302434	11.3908
	4.97698	1.79982	0.918806	0.303447	11.3645
	4.98031	1.79172	0.905931	0.30452	11.3385
	4.98365	1.78391	0.893056	0.305653	11.3124
	4.98698	1.7764	0.880301	0.306904	11.2864
	4.99031	1.76919	0.867605	0.308216	11.2604
	4.99365	1.76221	0.855029	0.309587	11.2345
	4.99698	1.7556	0.842631	0.311017	11.2086
	5.00031	1.74922	0.830352	0.312507	11.1827
	5.00365	1.74314	0.818253	0.313938	11.1569
	5.00698	1.73718	0.806391	0.315368	11.1309
	5.01031	1.73146	0.794828	0.316739	11.1049
	5.01365	1.72579	0.783503	0.31805	11.0787
	5.01698	1.72031	0.772476	0.319302	11.0525
	5.02031	1.71489	0.761867	0.320494	11.026
	5.02365	1.70952	0.751674	0.321686	10.9994
	5.02698	1.70428	0.741899	0.322759	10.9727
	5.03031	1.69903	0.732541	0.323892	10.9458
	5.03365	1.6939	0.72372	0.324965	10.9187
	5.03698	1.68884	0.715375	0.326037	10.8917
	5.04031	1.68383	0.707567	0.32711	10.8644
	5.04365	1.67894	0.700295	0.328243	10.8373
	5.04698	1.67418	0.693619	0.329316	10.8101
	5.05031	1.66941	0.68754	0.330448	10.783
	5.05365	1.66476	0.681937	0.331581	10.7559
	5.05698	1.66005	0.67687	0.332773	10.7289
	5.06031	1.65534	0.672281	0.333965	10.7019
	5.06365	1.65063	0.668108	0.335217	10.6749
	5.06698	1.6458	0.664234	0.336528	10.6479
	5.07031	1.64092	0.660658	0.337839	10.6211
	5.07365	1.63591	0.65726	0.33927	10.5943
	5.07698	1.63084	0.654042	0.34076	10.5676
	5.08031	1.62572	0.651062	0.342369	10.541
	5.08365	1.62053	0.64826	0.344038	10.5144
	5.08698	1.61535	0.645697	0.345767	10.488
	5.09031	1.6101	0.643492	0.347555	10.4617
	5.09365	1.60486	0.641644	0.349402	10.4357
	5.09698	1.59961	0.640213	0.351191	10.4099
	5.10031	1.59436	0.63926	0.352859	10.3843
	5.10365	1.58912	0.638723	0.354469	10.3589
	5.10698	1.58381	0.638664	0.356019	10.3339
	5.11031	1.57845	0.638902	0.357449	10.309
	5.11365	1.57315	0.639498	0.35876	10.2844
	5.11698	1.56778	0.640333	0.360072	10.2601
	5.12031	1.56242	0.641346	0.361383	10.236
	5.12365	1.55705	0.642538	0.362754	10.2121
	5.12698	1.55175	0.643909	0.364184	10.1884
	5.13031	1.5465	0.645399	0.365615	10.1648
	5.13365	1.54138	0.647068	0.367165	10.1415
	5.13698	1.53631	0.648975	0.368774	10.1184
	5.14031	1.53142	0.651121	0.370324	10.0954
	5.14365	1.52665	0.653446	0.371873	10.0726
	5.14698	1.522	0.655949	0.373363	10.0501
	5.15031	1.51753	0.658751	0.374854	10.0279
	5.15365	1.51324	0.661731	0.376344	10.0059
	5.15698	1.50907	0.66489	0.377774	9.98418
	5.16031	1.50514	0.668287	0.379324	9.96272
	5.16365	1.50132	0.671804	0.380993	9.94151
	5.16698	1.49781	0.67544	0.382781	9.92058
	5.17031	1.49447	0.679195	0.384867	9.8999
	5.17365	1.49137	0.68301	0.387192	9.87952
	5.17698	1.48857	0.686944	0.389814	9.85937
	5.18031	1.48606	0.690818	0.392735	9.83947
	5.18365	1.4838	0.694633	0.395894	9.82004
	5.18698	1.48189	0.698328	0.399351	9.80091
	5.19031	1.48034	0.701845	0.402987	9.78214
	5.19365	1.47903	0.705302	0.406742	9.76372
	5.19698	1.47808	0.70858	0.410676	9.74567
	5.20031	1.47742	0.711739	0.41461	9.72796
	5.20365	1.47706	0.714779	0.418544	9.71056
	5.20698	1.47706	0.717819	0.422537	9.69351
	5.21031	1.47736	0.720859	0.426412	9.67682
	5.21365	1.47802	0.723958	0.430405	9.66037
	5.21698	1.47909	0.727117	0.434399	9.64439
	5.22031	1.48052	0.730455	0.438452	9.62865
	5.22365	1.48237	0.733912	0.442684	9.61321
	5.22698	1.48469	0.737488	0.447094	9.59818
	5.23031	1.48743	0.741243	0.451744	9.58352
	5.23365	1.49053	0.745058	0.456691	9.56928
	5.23698	1.49399	0.749052	0.461936	9.55539
	5.24031	1.49781	0.753105	0.467479	9.54198
	5.24365	1.50186	0.757277	0.47332	9.52899
	5.24698	1.50621	0.761569	0.4794	9.51636
	5.25031	1.51074	0.7658	0.485659	9.5042
	5.25365	1.51557	0.770092	0.492156	9.49252
	5.25698	1.52057	0.774324	0.498772	9.48114
	5.26031	1.52588	0.778377	0.505507	9.47011
	5.26365	1.53142	0.782311	0.512362	9.45944
	5.26698	1.53714	0.785947	0.519335	9.44907
	5.27031	1.54316	0.789225	0.526309	9.43899
	5.27365	1.54942	0.792086	0.533402	9.4291
	5.27698	1.5558	0.79459	0.540555	9.41956
	5.28031	1.56236	0.796735	0.547767	9.41032
	5.28365	1.56897	0.798523	0.554979	9.40137
	5.28698	1.57571	0.800014	0.562191	9.39285
	5.29031	1.5825	0.801384	0.569463	9.38456
	5.29365	1.5893	0.802577	0.576675	9.37682
	5.29698	1.59609	0.803828	0.583947	9.36942
	5.30031	1.60283	0.80514	0.591159	9.36245
	5.30365	1.60956	0.80651	0.598431	9.3559
	5.30698	1.61612	0.807941	0.605702	9.3497
	5.31031	1.62256	0.809491	0.612974	9.34392
	5.31365	1.6287	0.8111	0.620306	9.33856
	5.31698	1.6346	0.812829	0.627697	9.33355
	5.32031	1.64014	0.814557	0.635028	9.32878
	5.32365	1.64527	0.816345	0.642419	9.32425
	5.32698	1.64992	0.818253	0.64975	9.32001
	5.33031	1.65403	0.82022	0.657022	9.31589
	5.33365	1.65766	0.822306	0.664234	9.3119
	5.33698	1.66076	0.82469	0.671387	9.30802
	5.34031	1.66327	0.827312	0.67842	9.30415
	5.34365	1.66523	0.830233	0.685394	9.30039
	5.34698	1.66661	0.833452	0.692308	9.2967
	5.35031	1.66744	0.836968	0.699043	9.29319
	5.35365	1.66768	0.840843	0.705659	9.2898
	5.35698	1.66732	0.845075	0.712156	9.28676
	5.36031	1.66637	0.849545	0.718534	9.28397
	5.36365	1.66482	0.854373	0.724792	9.28141
	5.36698	1.66261	0.859499	0.730813	9.27915
	5.37031	1.65987	0.865042	0.736713	9.27718
	5.37365	1.65647	0.871062	0.742316	9.27539
	5.37698	1.65242	0.877678	0.74774	9.27372
	5.38031	1.64777	0.885069	0.752985	9.2721
	5.38365	1.64253	0.893414	0.757933	9.27055
	5.38698	1.63668	0.902772	0.762701	9.269
	5.39031	1.63031	0.913441	0.767291	9.26745
	5.39365	1.62339	0.925481	0.771701	9.2659
	5.39698	1.616	0.939131	0.775933	9.2644
	5.40031	1.60819	0.954449	0.780165	9.26286
	5.40365	1.59997	0.971556	0.784278	9.26143
	5.40698	1.5915	0.990689	0.788391	9.26005
	5.41031	1.58274	1.01203	0.792503	9.25875
	5.41365	1.57374	1.03563	0.796676	9.25755
	5.41698	1.56462	1.0618	0.800848	9.25624
	5.42031	1.55538	1.09076	0.80514	9.25504
	5.42365	1.54614	1.12277	0.809371	9.25367
	5.42698	1.53691	1.15812	0.813603	9.25224
	5.43031	1.52779	1.19704	0.817776	9.25069
	5.43365	1.51879	1.23978	0.821888	9.24913
	5.43698	1.5099	1.28657	0.825942	9.2474
	5.44031	1.50126	1.33771	0.829875	9.24568
	5.44365	1.4928	1.3932	0.83369	9.24395
	5.44698	1.48451	1.45322	0.837386	9.24217
	5.45031	1.47641	1.51783	0.840962	9.24038
	5.45365	1.46848	1.58703	0.844479	9.23854
	5.45698	1.46067	1.66076	0.847876	9.23675
	5.46031	1.45304	1.73897	0.851214	9.23491
	5.46365	1.44553	1.82146	0.854433	9.233
	5.46698	1.43814	1.90806	0.857472	9.2311
	5.47031	1.43081	1.99854	0.860453	9.22913
	5.47365	1.4236	2.09266	0.863254	9.22698
	5.47698	1.4165	2.19011	0.865996	9.22466
	5.48031	1.40953	2.29049	0.868738	9.22228
	5.48365	1.40274	2.39342	0.87142	9.21953
	5.48698	1.39612	2.49851	0.874221	9.21667
	5.49031	1.38974	2.6052	0.877023	9.2135
	5.49365	1.38366	2.71302	0.880063	9.21011
	5.49698	1.37788	2.82139	0.883222	9.20647
	5.50031	1.37234	2.92969	0.886619	9.20259
	5.50365	1.36709	3.03733	0.890315	9.1986
	5.50698	1.36209	3.14373	0.894248	9.19436
	5.51031	1.35732	3.2481	0.89848	9.18989
	5.51365	1.35273	3.35002	0.90301	9.18531
	5.51698	1.34832	3.44872	0.907779	9.1806
	5.52031	1.34408	3.54362	0.912905	9.17559
	5.52365	1.33991	3.63427	0.91821	9.17041
	5.52698	1.3358	3.72005	0.923812	9.16499
	5.53031	1.33175	3.80045	0.929534	9.15933
	5.53365	1.32775	3.87514	0.935376	9.15349
	5.53698	1.32376	3.94368	0.941277	9.14735
	5.54031	1.31983	4.00561	0.947177	9.14091
	5.54365	1.31583	4.06069	0.953019	9.13418
	5.54698	1.31184	4.10855	0.9588	9.12715
	5.55031	1.3079	4.14908	0.964522	9.11964
	5.55365	1.30391	4.18198	0.970185	9.1117
	5.55698	1.29998	4.20719	0.975728	9.10324
	5.56031	1.2961	4.2246	0.981271	9.09424
	5.56365	1.29223	4.23414	0.986755	9.08475
	5.56698	1.28841	4.2358	0.992179	9.07468
	5.57031	1.2846	4.22972	0.997543	9.06419
	5.57365	1.28084	4.21602	1.00285	9.05316
	5.57698	1.27697	4.19486	1.00809	9.04171
	5.58031	1.2731	4.16642	1.01316	9.0298
	5.58365	1.2691	4.13102	1.01811	9.01752
	5.58698	1.26499	4.08894	1.02288	9.0047
	5.59031	1.26076	4.04054	1.02741	8.99135
	5.59365	1.25647	3.98624	1.03164	8.97752
	5.59698	1.25211	3.92646	1.03563	8.9631
	5.60031	1.2477	3.86161	1.03927	8.94808
	5.60365	1.24323	3.79229	1.04272	8.93253
	5.60698	1.23888	3.71897	1.04588	8.91637
	5.61031	1.23453	3.64226	1.0488	8.89968
	5.61365	1.23024	3.56269	1.05143	8.88252
	5.61698	1.22601	3.48085	1.05387	8.86493
	5.62031	1.22184	3.39746	1.05602	8.84687
	5.62365	1.21778	3.313	1.05792	8.8284
	5.62698	1.21373	3.22807	1.05941	8.8095
	5.63031	1.20974	3.14319	1.06055	8.79013
	5.63365	1.20586	3.05885	1.0612	8.7704
	5.63698	1.20205	2.97546	1.06132	8.75013
	5.64031	1.19829	2.89345	1.0609	8.72939
	5.64365	1.19472	2.81304	1.05989	8.70811
	5.64698	1.19126	2.73448	1.05828	8.68629
	5.65031	1.18792	2.65801	1.05619	8.66394
	5.65365	1.1847	2.5838	1.05363	8.64105
	5.65698	1.1816	2.51198	1.05065	8.61768
	5.66031	1.17868	2.44272	1.04737	8.59372
	5.66365	1.17582	2.37608	1.04374	8.5694
	5.66698	1.17314	2.31212	1.03986	8.54449
	5.67031	1.17052	2.25097	1.03575	8.51916
	5.67365	1.16807	2.19268	1.03146	8.49342
	5.67698	1.16569	2.1373	1.02687	8.46719
	5.68031	1.16336	2.08473	1.02204	8.44055
	5.68365	1.16122	2.03508	1.01691	8.4135
	5.68698	1.15919	1.98823	1.01143	8.38607
	5.69031	1.15728	1.94407	1.00559	8.35811
	5.69365	1.15544	1.90258	0.999391	8.32985
	5.69698	1.15377	1.86366	0.992835	8.30112
	5.70031	1.15228	1.82718	0.98604	8.27209
	5.70365	1.15097	1.79309	0.979125	8.24282
	5.70698	1.14989	1.7612	0.972211	8.21326
	5.71031	1.14906	1.73146	0.965476	8.18351
	5.71365	1.14858	1.70374	0.959039	8.15359
	5.71698	1.1484	1.67787	0.953078	8.12356
	5.72031	1.14858	1.65385	0.947714	8.09347
	5.72365	1.14918	1.63144	0.942886	8.0632
	5.72698	1.15019	1.61058	0.938654	8.03292
	5.73031	1.15162	1.59109	0.934839	8.00253
	5.73365	1.15359	1.57285	0.931144	7.97214
	5.73698	1.15615	1.55574	0.927329	7.94168
	5.74031	1.15931	1.53977	0.923097	7.91117
	5.74365	1.16318	1.52475	0.91815	7.88059
	5.74698	1.16777	1.51068	0.912309	7.84995
	5.75031	1.17332	1.49751	0.905335	7.81931
	5.75365	1.17975	1.48523	0.897348	7.78861
	5.75698	1.18726	1.47378	0.888288	7.75785
	5.76031	1.19585	1.46317	0.878394	7.72703
	5.76365	1.20568	1.45328	0.867784	7.69615
	5.76698	1.21683	1.44404	0.856757	7.66521
	5.77031	1.22947	1.43546	0.845551	7.63421
	5.77365	1.24353	1.42747	0.834405	7.60322
	5.77698	1.25933	1.42002	0.823438	7.57228
	5.78031	1.27685	1.41311	0.812709	7.5414
	5.78365	1.29634	1.40667	0.802338	7.51052
	5.78698	1.3178	1.40065	0.792265	7.47977
	5.79031	1.3414	1.39511	0.78243	7.44913
	5.79365	1.36733	1.38998	0.772774	7.41855
	5.79698	1.39558	1.38533	0.763297	7.38809
	5.80031	1.4264	1.38104	0.753939	7.35781
	5.80365	1.45978	1.37717	0.7447	7.32759
	5.80698	1.4959	1.37359	0.735521	7.29749
	5.81031	1.53476	1.37019	0.726461	7.26757
	5.81365	1.57648	1.36697	0.71758	7.23789
	5.81698	1.62113	1.36387	0.708818	7.20833
	5.82031	1.66869	1.36077	0.700295	7.17907
	5.82365	1.71918	1.35773	0.691891	7.15011
	5.82698	1.77258	1.35463	0.683665	7.12132
	5.83031	1.82897	1.35142	0.675559	7.09289
	5.83365	1.88816	1.34814	0.667572	7.06458
	5.83698	1.95026	1.34492	0.659585	7.03651
	5.84031	2.01511	1.3417	0.651717	7.00862
	5.84365	2.08271	1.33872	0.64379	6.98084
	5.84698	2.15286	1.33592	0.635862	6.95325
	5.85031	2.22546	1.33342	0.627875	6.92583
	5.85365	2.30032	1.33127	0.619948	6.89865
	5.85698	2.37739	1.32954	0.611961	6.87165
	5.86031	2.45643	1.32823	0.604093	6.84495
	5.86365	2.53719	1.32728	0.596285	6.81854
	5.86698	2.6195	1.32668	0.588596	6.79237
	5.87031	2.70307	1.32638	0.580966	6.76657
	5.87365	2.78777	1.32632	0.573516	6.74099
	5.87698	2.87312	1.32644	0.566244	6.71566
	5.88031	2.95895	1.32674	0.559092	6.69056
	5.88365	3.04484	1.3271	0.552058	6.66564
	5.88698	3.13044	1.32763	0.545204	6.64091
	5.89031	3.21531	1.32829	0.538468	6.61641
	5.89365	3.29912	1.32912	0.531852	6.59215
	5.89698	3.38143	1.33008	0.525415	6.56801
	5.90031	3.46184	1.33121	0.519097	6.54411
	5.90365	3.53998	1.33258	0.512958	6.52038
	5.90698	3.61544	1.33419	0.507057	6.49696
	5.91031	3.68786	1.33592	0.501335	6.47377
	5.91365	3.75688	1.33795	0.495791	6.4507
	5.91698	3.82215	1.34009	0.490427	6.42794
	5.92031	3.88342	1.34242	0.485301	6.40541
	5.92365	3.94028	1.34486	0.480354	6.38317
	5.92698	3.99256	1.34748	0.475645	6.36118
	5.93031	4.03994	1.35016	0.471115	6.33954
	5.93365	4.0822	1.35291	0.466704	6.31814
	5.93698	4.1191	1.35565	0.462472	6.29704
	5.94031	4.15057	1.35839	0.458419	6.27624
	5.94365	4.17644	1.36119	0.454426	6.25568
	5.94698	4.1967	1.36387	0.450671	6.23541
	5.95031	4.21125	1.36662	0.447035	6.21539
	5.95365	4.22025	1.3693	0.443578	6.19554
	5.95698	4.22364	1.37198	0.440419	6.17581
	5.96031	4.22162	1.37472	0.437379	6.15632
	5.96365	4.21435	1.37752	0.434577	6.13701
	5.96698	4.20195	1.38032	0.431955	6.11787
	5.97031	4.1846	1.38324	0.429451	6.09898
	5.97365	4.16267	1.38623	0.427008	6.08032
	5.97698	4.13626	1.38921	0.424504	6.06202
	5.98031	4.10575	1.39225	0.421941	6.0439
	5.98365	4.07141	1.39534	0.419199	6.02608
	5.98698	4.03357	1.39844	0.416279	6.00849
	5.99031	3.99256	1.4016	0.413239	5.99121
	5.99365	3.94869	1.40488	0.41014	5.9741
	5.99698	3.90244	1.40828	0.406981	5.95717
	6.00031	3.85404	1.41186	0.404	5.94042
	6.00365	3.80397	1.41573	0.40108	5.92391
	6.00698	3.75247	1.4199	0.398397	5.90752
	6.01031	3.69984	1.42443	0.395954	5.89131
	6.01365	3.64649	1.42926	0.393748	5.87534
	6.01698	3.59261	1.43439	0.391722	5.85961
	6.02031	3.53849	1.43975	0.389814	5.84418
	6.02365	3.48431	1.44535	0.387907	5.82892
	6.02698	3.43031	1.45102	0.386059	5.81397
	6.03031	3.37672	1.45674	0.384152	5.79919
	6.03365	3.32373	1.46246	0.382245	5.78459
	6.03698	3.27146	1.468	0.380218	5.77016
	6.04031	3.22014	1.47343	0.378191	5.75585
	6.04365	3.16978	1.47873	0.376046	5.7416
	6.04698	3.1206	1.48398	0.3739	5.72741
	6.05031	3.07268	1.4891	0.371695	5.71328
	6.05365	3.02601	1.49417	0.369549	5.69915
	6.05698	2.98065	1.4993	0.367463	5.68514
	6.06031	2.93666	1.50448	0.365436	5.67119
	6.06365	2.89404	1.50979	0.363529	5.65724
	6.06698	2.85286	1.51527	0.3618	5.64341
	6.07031	2.81304	1.52099	0.360191	5.62971
	6.07365	2.77466	1.52689	0.35882	5.61606
	6.07698	2.7377	1.53303	0.357687	5.60259
	6.08031	2.70212	1.53929	0.356734	5.58924
	6.08365	2.6679	1.54573	0.355899	5.57595
	6.08698	2.63512	1.55228	0.355124	5.56278
	6.09031	2.60365	1.5589	0.35435	5.54978
	6.09365	2.57349	1.56564	0.353575	5.53685
	6.09698	2.54458	1.57237	0.352681	5.52409
	6.10031	2.51687	1.57928	0.351667	5.51133
	6.10365	2.49028	1.5862	0.350475	5.49876
	6.10698	2.46477	1.59329	0.349283	5.4863
	6.11031	2.44027	1.60044	0.347972	5.47396
	6.11365	2.41673	1.60766	0.346661	5.4618
	6.11698	2.39402	1.61499	0.345409	5.4497
	6.12031	2.37209	1.62238	0.344336	5.43778
	6.12365	2.35087	1.62977	0.343382	5.42586
	6.12698	2.33018	1.63716	0.342607	5.41406
	6.13031	2.3101	1.64455	0.341952	5.40238
	6.13365	2.29037	1.65188	0.341475	5.39076
	6.13698	2.27112	1.65915	0.341117	5.3792
	6.14031	2.25216	1.66643	0.34076	5.36769
	6.14365	2.23356	1.6737	0.340462	5.35624
	6.14698	2.21533	1.68091	0.340164	5.34486
	6.15031	2.19733	1.68818	0.339806	5.33348
	6.15365	2.17968	1.69539	0.339508	5.32221
	6.15698	2.16228	1.70261	0.33915	5.31113
	6.16031	2.14511	1.70976	0.338852	5.3001
	6.16365	2.12812	1.71691	0.338614	5.28919
	6.16698	2.11132	1.72406	0.338495	5.27853
	6.17031	2.09469	1.7311	0.338435	5.26798
	6.17365	2.07806	1.73807	0.338435	5.25774
	6.17698	2.06149	1.74499	0.338554	5.24767
	6.18031	2.04498	1.75178	0.338674	5.23783
	6.18365	2.02841	1.75852	0.338733	5.22818
	6.18698	2.0119	1.76519	0.338793	5.21876
	6.19031	1.99527	1.77193	0.338733	5.2094
	6.19365	1.9787	1.7786	0.338554	5.20023
	6.19698	1.96207	1.7854	0.338316	5.1911
	6.20031	1.94538	1.79237	0.337899	5.18192
	6.20365	1.92863	1.79946	0.337422	5.17279
	6.20698	1.91188	1.80674	0.336885	5.16355
	6.21031	1.89513	1.81413	0.336289	5.15436
	6.21365	1.87832	1.8217	0.335693	5.14518
	6.21698	1.86157	1.82933	0.335038	5.13612
	6.22031	1.84482	1.83696	0.334382	5.12711
	6.22365	1.82819	1.84458	0.333786	5.11811
	6.22698	1.81162	1.8521	0.33313	5.10935
	6.23031	1.79523	1.85955	0.332534	5.1007
	6.23365	1.77908	1.86682	0.331879	5.09218
	6.23698	1.76305	1.87397	0.331283	5.08384
	6.24031	1.74725	1.88106	0.330687	5.07562
	6.24365	1.73157	1.8881	0.330091	5.06758
	6.24698	1.71614	1.89513	0.329494	5.05966
	6.25031	1.70076	1.90216	0.328958	5.05179
	6.25365	1.68556	1.90926	0.328481	5.04399
	6.25698	1.67042	1.91647	0.328064	5.03636
	6.26031	1.65534	1.92374	0.327706	5.02879
	6.26365	1.64032	1.93107	0.327408	5.02121
	6.26698	1.62542	1.93846	0.32717	5.01376
	6.27031	1.61058	1.94591	0.326991	5.00636
	6.27365	1.59597	1.95342	0.326931	4.99896
	6.27698	1.58155	1.96081	0.326931	4.99175
	6.28031	1.56736	1.9682	0.326991	4.98454
	6.28365	1.55342	1.97554	0.32717	4.9775
	6.28698	1.53977	1.98269	0.327408	4.97053
	6.29031	1.52642	1.98972	0.327706	4.9638
	6.29365	1.51342	1.99658	0.328064	4.95706
	6.29698	1.50073	2.00331	0.328481	4.95033
	6.30031	1.48845	2.00993	0.328898	4.94372
	6.30365	1.47653	2.01643	0.329375	4.93723
	6.30698	1.46502	2.0228	0.329792	4.9308
	6.31031	1.454	2.02912	0.33021	4.92448
	6.31365	1.44333	2.03544	0.330567	4.91823
	6.31698	1.43313	2.04176	0.330806	4.91203
	6.32031	1.42336	2.04819	0.331044	4.90589
	6.32365	1.41394	2.05463	0.331223	4.89987
	6.32698	1.40482	2.06113	0.331402	4.89384
	6.33031	1.39606	2.06769	0.331581	4.88776
	6.33365	1.38754	2.0743	0.331759	4.88173
	6.33698	1.37931	2.08092	0.332117	4.87571
	6.34031	1.37138	2.08753	0.332534	4.86963
	6.34365	1.36375	2.09403	0.33313	4.86355
	6.34698	1.35648	2.10053	0.333905	4.85753
	6.35031	1.34963	2.1069	0.334799	4.85157
	6.35365	1.34313	2.11316	0.335813	4.84568
	6.35698	1.33705	2.11936	0.336885	4.83996
	6.36031	1.33133	2.1255	0.337958	4.83435
	6.36365	1.32608	2.13158	0.339091	4.82881
	6.36698	1.3212	2.13766	0.340104	4.82339
	6.37031	1.31667	2.14374	0.341117	4.81808
	6.37365	1.31255	2.14988	0.342071	4.8129
	6.37698	1.3088	2.15602	0.342965	4.80783
	6.38031	1.3054	2.16228	0.343919	4.80281
	6.38365	1.30248	2.1686	0.344932	4.79786
	6.38698	1.29992	2.17497	0.346005	4.79304
	6.39031	1.29771	2.18141	0.347197	4.78838
	6.39365	1.29598	2.18785	0.348508	4.78374
	6.39698	1.29455	2.1944	0.349998	4.77939
	6.40031	1.29354	2.20102	0.351667	4.7751
	6.40365	1.29277	2.2077	0.353456	4.77099
	6.40698	1.29229	2.21443	0.355363	4.76694
	6.41031	1.29205	2.22123	0.357449	4.76301
	6.41365	1.29199	2.22808	0.359654	4.75926
	6.41698	1.29211	2.23494	0.361979	4.75562
	6.42031	1.29235	2.24179	0.364423	4.75205
	6.42365	1.29277	2.24864	0.366986	4.74859
	6.42698	1.29324	2.25544	0.369608	4.74519
	6.43031	1.29384	2.26218	0.37235	4.74185
	6.43365	1.29443	2.26879	0.375211	4.73857
	6.43698	1.29509	2.27523	0.378072	4.73528
	6.44031	1.2958	2.28155	0.380993	4.73201
	6.44365	1.29646	2.28775	0.383973	4.72884
	6.44698	1.29718	2.29383	0.387013	4.72569
	6.45031	1.29783	2.29979	0.390053	4.72264
	6.45365	1.29849	2.30563	0.393152	4.71955
	6.45698	1.29908	2.31141	0.396252	4.71657
	6.46031	1.29974	2.31719	0.39947	4.71365
	6.46365	1.30033	2.32291	0.402629	4.71085
	6.46698	1.30099	2.32857	0.405908	4.70811
	6.47031	1.30153	2.33418	0.409186	4.70549
	6.47365	1.30206	2.33972	0.412464	4.70293
	6.47698	1.30248	2.34509	0.415742	4.70042
	6.48031	1.30284	2.35033	0.419021	4.69798
	6.48365	1.30302	2.35546	0.422299	4.69572
	6.48698	1.30302	2.3604	0.425577	4.69345
	6.49031	1.3029	2.36529	0.428736	4.69131
	6.49365	1.30254	2.37	0.431895	4.68922
	6.49698	1.302	2.37465	0.434935	4.68714
	6.50031	1.30129	2.37924	0.437856	4.68517
	6.50365	1.30039	2.38365	0.440717	4.68326
	6.50698	1.29932	2.38788	0.443399	4.68141
	6.51031	1.29801	2.39193	0.445962	4.6795
	6.51365	1.29658	2.39569	0.448406	4.67766
	6.51698	1.29503	2.39903	0.45079	4.67574
	6.52031	1.29336	2.40201	0.453055	4.67371
	6.52365	1.29157	2.40451	0.455201	4.67174
	6.52698	1.28967	2.40654	0.457346	4.66965
	6.53031	1.2877	2.40815	0.459492	4.66756
	6.53365	1.28561	2.4094	0.461578	4.66547
	6.53698	1.28353	2.41041	0.463605	4.66333
	6.54031	1.28138	2.41119	0.465631	4.66124
	6.54365	1.27912	2.4119	0.467539	4.65916
	6.54698	1.27685	2.41256	0.469446	4.6572
	6.55031	1.27447	2.41321	0.471175	4.65523
	6.55365	1.27202	2.41381	0.472784	4.65339
	6.55698	1.26946	2.41441	0.474274	4.65155
	6.56031	1.26684	2.41488	0.475526	4.64976
	6.56365	1.2641	2.41512	0.476658	4.64797
	6.56698	1.26129	2.41506	0.477493	4.64624
	6.57031	1.25843	2.4147	0.478148	4.64445
	6.57365	1.25551	2.41387	0.478625	4.64272
	6.57698	1.25259	2.41268	0.478923	4.64105
	6.58031	1.24967	2.41113	0.479043	4.63932
	6.58365	1.24681	2.40928	0.479102	4.63771
	6.58698	1.24395	2.40725	0.479043	4.63616
	6.59031	1.24115	2.40517	0.478923	4.63462
	6.59365	1.23841	2.40302	0.478804	4.63325
	6.59698	1.23572	2.40099	0.478745	4.63181
	6.60031	1.2331	2.39909	0.478625	4.63039
	6.60365	1.23042	2.39736	0.478506	4.62907
	6.60698	1.2278	2.39587	0.478327	4.62764
	6.61031	1.22517	2.3945	0.478148	4.62627
	6.61365	1.22249	2.39331	0.477791	4.62472
	6.61698	1.21975	2.39223	0.477374	4.62317
	6.62031	1.21695	2.39116	0.476897	4.62155
	6.62365	1.21409	2.39015	0.476301	4.61983
	6.62698	1.21117	2.38907	0.475645	4.61822
	6.63031	1.20813	2.38794	0.47493	4.61655
	6.63365	1.20503	2.38675	0.474274	4.61494
	6.63698	1.20193	2.3855	0.473619	4.61345
	6.64031	1.19877	2.38413	0.473082	4.61202
	6.64365	1.19561	2.38276	0.472546	4.61065
	6.64698	1.19251	2.38132	0.472069	4.6094
	6.65031	1.18947	2.37989	0.471592	4.60815
	6.65365	1.18655	2.37846	0.471175	4.60696
	6.65698	1.18375	2.37703	0.470638	4.60578
[truncated: 13,002 more rows]
