# Supplementary material for: Antibiotic-induced accumulation of lipid II synergizes with antimicrobial fatty acids to eradicate bacterial populations
Source: eLife. 2023 Mar 6;12:e80246. doi: 10.7554/eLife.80246 (PMC10030119; doi:10.7554/eLife.80246)
Supplement: Figure 4—figure supplement 3—source data 1. [file elife-80246-fig4-figsupp3-data1.xlsx]

## Sheet: Fig. sup. 3A
Figure 4 - figure supplement 3A
10min foci overall as a percentage of the total populations
		0	1	>2
	PA + VAN(20)	46.5041	44.2715	9.22444
	PA + VAN(10)	66.7939	30.916	2.29008
	PA(11)	81.1954	17.1618	1.64278
	VAN(20)	85.3591	12.0856	2.55525
	Control	86.3371	13.0012	0.661736

## Sheet: Fig. sup. 3B
10 minute volume overall
		Control	VAN(20)	PA(11)	PA + VAN(10)	PA + VAN(20)
		1.59876	0.654904	0.837951	1.48121	1.73193
		1.86346	1.24223	0.696482	1.60712	0.773939
		1.68436	1.60842	1.37361	0.82723	0.964695
		2.51856	0.964732	0.92388	0.963245	1.17015
		1.68194	0.68334	1.60153	2.85088	1.30963
		1.19887	2.16356	1.16947	1.11308	1.164
		1.27277	1.54235	1.05221	1.56665	1.05019
		1.56184	1.20622	0.861888	0.770051	0.968657
		2.187	1.53502	1.15418	1.99146	0.723897
		1.81529	2.05836	1.25982	0.810337	1.5761
		1.82399	0.715303	2.32002	1.3167	0.689355
		1.21501	1.31181	1.01951	2.33968	0.635322
		1.50862	1.88124	1.79546	1.41932	0.697894
		1.61791	1.11382	0.938849	2.18611	1.0638
		0.861006	1.89444	0.826938	2.03621	1.00168
		1.44137	1.80425	1.02724	1.32571	1.30504
		0.895986	1.3203	1.3768	1.16845	0.560411
		2.21222	2.02217	0.877254	1.21967	1.13865
		1.88292	3.75686	1.83988	1.29304	0.768805
		1.24757	2.71335	1.5987	1.45012	0.99853
		1.73829	1.53835	0.733039	1.28461	0.961011
		1.96089	1.60106	0.987542	1.10544	0.730011
		1.11831	1.9226	1.33713	1.87692	1.25316
		1.29862	1.11791	1.38001	1.72847	2.11246
		2.08295	1.49445	1.98579	0.359056	1.24505
		1.15748	1.47111	1.13672	2.78611	0.980126
		0.727838	1.54945	1.48324	0.724723	1.04587
		1.39733	2.15278	1.53873	1.31492	1.1129
		1.36648	1.47212	0.405512	1.72781	0.689904
		1.67709	1.69729	1.69417	1.33898	1.07142
		1.94235	1.91834	1.25277	1.36902	3.10655
		1.88121	1.29375	0.550452	1.19393	1.47006
		1.03385	1.5306	1.41309	1.65501	0.853194
		1.36257	1.39684	1.07977	1.4545	1.03442
		1.45166	2.37291	2.14177	0.925376	1.30702
		1.50039	1.67655	0.919319	1.66219	1.2033
		2.00774	1.5093	0.78072	0.969292	0.826593
		1.58753	2.10625	1.82284	1.51062	1.32505
		2.2529	2.25312	1.31275	1.42119	1.2608
		0.865498	1.56039	0.927884	1.54563	1.47383
		1.69264	2.01	1.00846	1.31134	1.21354
		1.3385	1.39572	0.748179	1.03221	0.924939
		1.0671	1.07335	1.3044	1.68408	1.3585
		1.70876	0.659112	1.05841	1.01099	0.896473
		1.4927	1.14579	0.918959	1.2557	0.986846
		2.34218	1.03566	0.941232	0.94514	1.59349
		1.01604	2.26263	1.85548	1.83844	1.23725
		0.885048	1.90064	0.747838	1.35111	1.81548
		0.764093	1.96572	0.976538	1.33831	1.91584
		1.66188	1.07321	1.03883	2.00729	2.1447
		1.35031	1.40362	1.22011	2.45274	2.20103
		1.86002	1.82933	1.40739	2.30417	1.27185
		1.38334	0.659966	1.49945	1.34056	0.837803
		2.46378	1.37562	0.815216	1.54662	1.25307
		0.798746	1.04336	0.780148	1.06762	0.828816
		1.74333	1.36716	1.23751	1.83647	2.16646
		1.3507	1.48248	1.15503	0.804753	1.28306
		0.87771	1.35576	1.25042	1.62265	1.58469
		2.405	2.14797	1.15153	1.84781	0.80124
		1.45747	1.46569	1.28631	0.966105	1.135
		2.16646	1.4184	0.490064	0.927441	0.535262
		1.54374	1.66381	0.946138	1.06598	0.956051
		1.75938	1.74807	1.48711	1.98899	0.97255
		0.913669	1.05276	1.51457	1.63803	1.59016
		1.85707	1.54496	1.20788	1.45066	1.62253
		2.39542	1.49524	2.0339	1.53634	1.28785
		1.69746	2.48728	0.443609	2.23001	0.800511
		1.17615	1.73404	0.517811	1.61914	0.912689
		0.748876	2.63419	0.98339	2.00963	1.32779
		1.77781	2.27381	1.77871	0.872136	1.05313
		2.17523	1.73705	1.54211	0.639778	1.07385
		0.869093	1.84766	1.48035	1.3277	1.81128
		1.57591	1.88138	1.37029	1.30311	0.870979
		0.748876	1.54839	1.59698	1.22217	1.11103
		1.32574	2.01304	0.982775	2.17499	1.49053
		1.85605	1.7949	1.15864	2.40469	0.825566
		1.68479	2.1143	0.948977	1.82788	1.29688
		1.62199	2.23603	0.769174	1.22354	1.18354
		2.25026	1.45234	1.24994	0.871841	0.556494
		1.20391	1.98126	1.14197	0.895853	2.01123
		2.14472	2.12667	1.38786	0.814311	1.62997
		1.68696	2.22771	1.81295	1.78155	1.51558
		1.66994	1.35897	0.554104	1.00205	1.28131
		1.79663	1.43781	2.64714	2.21349	1.65676
		2.22246	1.49911	0.620015	1.96764	1.25205
		3.36564	1.37884	1.35938	1.21568	1.28581
		1.58138	1.34923	1.31771	2.81764	1.49293
		2.10229	1.10397	0.765092	1.75957	1.60895
		1.18332	0.556494	1.20477	0.846791	0.949029
		1.78984	0.937655	1.49663	1.17458	1.17555
		1.47674	1.69598	0.718526	0.948607	0.946318
		1.97095	1.89599	1.0777	0.783046	1.04979
		0.71951	1.59251	0.96061	1.14783	1.23876
		1.45701	2.87236	0.714629	1.6105	0.75139
		1.39401	1.07289	2.04995	0.924029	0.879782
		0.884535	2.16026	1.00034	1.13931	0.689362
		1.63388	1.39098	0.742728	1.46687	1.09054
		1.92411	1.22362	1.5315	1.35933	1.34478
		1.22513	1.40638	2.64299	1.07598	1.8403
		2.21735	1.31255	1.15768	0.639096	0.98872
		1.06557	2.59533	2.07616	1.3823	0.900796
		1.41988	1.91965	1.4772	1.00036	1.19017
		1.59579	1.72983	0.890585	0.880374	1.9004
		0.803967	1.35044	1.16795	1.79949	0.892251
		1.83417	1.72346	1.45829	2.15739	2.30939
		2.15524	2.50674	1.10496	1.10929	1.17762
		1.2732	1.79982	2.16825	1.43054	1.22781
		1.80491	1.22842	1.01945	0.648403	0.817448
		2.17496	1.08882	0.359056	1.47791	1.25144
		1.77092	2.5001	0.981036	2.30884	1.13709
		2.3293	0.771655	1.48324	2.90409	1.23838
		1.36467	2.14757	1.55614	1.12678	0.703785
		2.98217	1.06154	1.08429	1.85512	0.530986
		1.56841	1.61002	1.32431	1.85379	1.22138
		1.58071	1.02472	0.987762	1.30838	2.09708
		1.11177	2.26095	1.32249	0.719849	2.98127
		1.95205	1.37909	2.41841	1.33	1.0649
		1.27738	1.0532	2.30224	2.12158	0.916799
		1.18285	1.5243	1.37649	1.24891	0.847105
		1.75928	1.7502	1.47628	1.71139	0.72241
		1.41335	2.26697	0.847355	0.700332	0.865262
		1.21439	2.73182	1.2524	0.844684	1.00018
		2.10801	1.96547	1.33446	1.55079	0.851109
		1.17735	1.75799	1.1848	0.866221	0.875016
		1.31643	0.451534	1.65386	1.80801	0.585598
		1.23995	1.06062	1.47185	2.5802	1.17841
		0.959292	1.35513	0.881023	2.15278	1.34138
		1.23174	2.25803	1.0045	0.677327	1.01485
		1.47224	1.31797	1.36252	1.39802	0.451534
		1.81436	0.76237	1.53327	0.977521	0.933176
		1.30221	1.29899	1.46925	2.31484	0.830405
		1.48484	1.80481	2.27901	2.00743	1.00443
		1.77238	1.17706	1.12713	1.66995	1.59998
		1.48419	1.22719	1.60559	0.948316	1.70948
		1.70002	1.78093	1.55223	2.91828	0.903672
		1.1687	1.46532	1.15794	0.845364	1.36505
		1.89524	1.69934	1.14719	2.11248	1.29658
		2.09124	1.36182	0.540452	1.1377	2.49364
		2.18943	1.77168	1.26448	2.97822	1.01892
		1.23739	2.86081	0.914363	1.79603	1.84228
		1.71672	2.44201	0.843357	0.682668	1.04277
		1.57019	1.56033	0.898807	1.23644	1.96113
		1.62037	1.95227	1.23119	0.758574	1.46742
		2.30184	0.720971	1.45472	2.20676	1.06624
		1.30808	0.949431	2.22485	1.3422	1.46886
		1.30799	2.06212	1.82112	1.26681	0.801921
		1.52625	1.43977	0.588366	0.747583	0.964323
		1.43209	0.703428	0.827875	1.58433	0.451534
		1.23636	1.64764	1.47246	2.80451	1.1338
		1.2354	1.69346	1.10442	1.65766	1.00298
		1.65072	1.55734	1.25335	1.92943	2.32068
		1.4216	1.30303	2.1538	2.81733	1.72524
		1.66208	0.987571	1.95033	1.33284	1.00025
		2.00731	1.09138	1.53391	1.2082	0.672512
		0.859463	1.12092	0.965282	2.45985	1.48403
		1.25791	2.45099	1.36215	1.47901	2.29342
		1.25012	0.852162	1.70058	1.73509	1.23804
		1.66656	0.732687	1.59557	3.49616	1.14499
		1.23791	0.959607	1.77143	2.72785	1.94694
		1.98706	2.10923	1.65559	2.29312	1.7887
		1.30077	1.32249	1.28023	1.39365	1.29629
		1.29891	1.03316	1.28604	1.60982	1.22284
		1.41529	1.7857	1.58205	3.23601	0.654579
		1.65315	1.93404	1.95589	1.30801	1.83798
		2.18579	1.85745	0.816035	1.42365	1.33309
		1.2171	1.46469	1.34232	1.35043	0.644394
		1.32271	2.43083	1.54439	1.2572	0.881243
		1.07082	1.22836	2.16271	1.52405	1.8103
		1.0398	1.21659	1.60287	3.21551	0.677366
		1.47643	0.889144	1.09708	1.00846	0.809132
		1.8126	0.957917	2.80173	0.928796	0.862216
		1.3771	2.32903	1.40787	1.29671	1.27625
		2.40566	1.62501	1.25649	1.68322	2.53691
		1.15168	1.19357	0.979787	1.16836	0.562101
		1.64211	1.53542	1.83146	1.44981	0.974468
		2.21492	1.59894	0.621294	1.22254	1.05871
		1.64715	2.21989	0.593064	2.05409	1.18802
		1.28843	1.41382	1.24737	1.5063	1.07533
		1.62087	1.77021	0.697754	1.51729	0.930882
		2.37994	2.7352	2.60035	1.95325	0.947255
		1.71611	1.42435	1.43742	1.84466	1.03984
		1.46367	1.04502	0.837266	0.4701	0.668219
		1.30958	1.36073	1.527	0.742557	1.4345
		2.35643	1.71978	1.24099	1.92923	0.781192
		2.48253	2.11835	0.969052	1.22093	0.695361
		1.98365	2.06485	0.822797	1.49664	1.37645
		1.05838	1.48887	1.08715	1.56769	0.796421
		1.68116	1.22453	2.66104	1.39558	0.756411
		1.03628	2.03487	1.47025	1.48954	2.07965
		2.85618	1.61352	1.12761	0.930214	0.78466
		3.07342	2.52805	1.36925	1.07862	1.01441
		1.68927	2.7167	1.3628	0.570767	1.26123
		1.78319	1.33497	1.02278	0.897549	1.26523
		1.23098	1.45289	0.743132	1.34921	1.59801
		1.55858	1.54792	1.00721	1.82777	1.20595
		1.39102	1.90781	1.51815	0.804533	0.582347
		1.96729	1.39068	1.10174	1.20688	1.89146
		1.46853	0.979403	0.925596	1.16273	1.14424
		1.41175	1.26221	0.853145	0.957071	1.16472
		1.08927	1.63914	1.09917	2.44573	1.83777
		1.65793	1.51791	1.41488	1.58807	2.24569
		1.76935	2.35775	1.42974	1.93138	1.02588
		2.18411	1.58691	1.30437	1.0521	0.789054
		0.967161	1.52981	1.05918	3.23444	1.08014
		1.81277	1.58008	1.9509	2.27632	0.799711
		1.74653	1.72496	2.04114	1.75535	1.99868
		2.23373	1.03394	0.405512	2.01748	0.946143
		0.826246	1.85281	1.37473	1.18452	1.19552
		1.26883	1.90319	0.787403	1.59175	1.10577
		1.0562	0.774509	0.845925	2.01726	1.32812
		0.988379	2.16296	0.982194	1.65657	0.690021
		0.713344	3.19353	1.45855	1.18485	0.92817
		2.88244	2.07731	1.67395	0.99972	1.59973
		1.20325	2.54438	1.73282	1.37498	0.867793
		1.1687	2.03179	1.37041	2.54126	1.93642
		0.87937	0.87866	1.358	1.52492	0.614288
		2.34144	0.970573	0.832517	1.91153	0.85087
		1.68692	1.89561	0.961026	1.13905	1.06839
		1.33983	1.33533	0.74574	3.3639	1.32597
		1.31109	1.34259	1.21533	2.63698	2.09883
		3.19764	2.15042	1.53696	1.32007	1.04832
		1.0685	2.07773	0.735274	1.41582	0.986242
		1.71736	1.64077	1.22614	1.12827	1.67454
		1.08899	1.68826	1.79641	1.10091	1.80313
		1.58563	1.5191	1.29186	1.21861	1.27309
		1.06603	1.31146	1.8085	2.13369	1.28777
		1.25082	2.1107	1.87398	1.21045	0.771777
		2.0374	1.44059	2.10204	1.4015	0.922403
		1.53917	1.36217	2.42905	1.33685	1.95957
		1.79006	1.2109	1.85027	1.18446	1.35257
		3.22662	1.67901	1.74932	0.82226	0.802629
		2.23302	1.79361	0.962011	0.956187	1.33153
		2.31693	1.61869	1.26782	2.43947	0.810253
		2.18868	1.64346	1.30321	1.2666	1.3058
		1.75242	2.23591	2.04669	1.72526	2.14742
		2.0016	1.91629	1.50188	2.27474	1.18322
		2.04756	1.74636	1.2192	1.1509	1.43932
		1.70151	1.79466	2.51385	2.66202	1.15118
		0.877593	1.4188	1.76509	1.18754	1.09387
		1.77016	1.07695	1.83432	2.43817	0.930842
		2.05718	1.52499	1.1425	1.30257	1.66553
		1.91677	1.66678	0.996297	1.04624	1.11591
		0.875894	2.34224	1.3476	1.56003	0.659351
		2.56074	2.41157	1.62905	0.958954	0.91735
		1.68359	2.65082	0.587617	0.966632	1.05744
		1.79169	1.66832	1.06075	1.39418	0.722924
		2.56515	1.39842	1.32146	2.30789	0.869362
		2.242	2.1883	1.11522	2.45546	0.826931
		0.580038	1.3093	1.63724	0.918922	1.35498
		3.55488	2.2179	1.16291	2.03976	0.850333
		1.65563	2.44459	1.34425	1.1617	1.23276
		1.40819	1.26923	2.78824	2.54186	1.0143
		1.02312	1.12404	0.791498	1.00568	0.935149
		1.71446	2.32806	0.757724	1.23453	0.728909
		1.78694	0.911027	1.26358	0.818519	0.451534
		1.80186	1.73727	1.41869	1.22981	0.696482
		1.12941	1.89827	1.51124	1.81316	0.703601
		1.58171	1.59396	2.6641	0.942068	1.31985
		1.80316	1.89131	1.31604	0.859677	0.669675
		1.98815	1.94764	0.945425	1.7108	1.49713
		2.17786	1.12343	0.888734	1.19992	1.63843
		2.20507	1.62011	1.16836	2.09039	0.944076
		0.85273	0.796667	1.27161	1.94058	0.95091
		1.62262	1.73402	0.693604	1.36416	1.77748
		0.662537	1.22717	1.97711	1.27634	0.824263
		0.819863	1.99876	1.30877	0.982822	1.87444
		2.04359	2.88488	2.37646	1.0306	0.497318
		1.37037	1.35163	1.20979	1.74958	1.42661
		1.78614	1.0126	1.49964	1.14732	1.77145
		0.96394	1.43603	1.0419	2.23877	2.21187
		2.35755	0.668407	1.17454	3.53441	1.45251
		2.18647	0.825703	1.01568	3.08244	0.802888
		1.55734	0.405512	1.13557	1.41605	1.37385
		3.30067	1.55167	0.987623	0.772609	1.08546
		1.97924	1.15421	1.98767	1.24602	1.03991
		1.64925	1.14331	2.52606	1.37659	1.1525
		1.40245	1.5797	0.891031	1.15806	2.24591
		1.3477	1.72362	1.65409	2.48404	1.37691
		1.4386	1.72039	1.00957	1.2531	0.843899
		2.72749	0.73995	1.259	2.4039	1.05876
		1.9553	0.803412	1.0683	2.02966	1.06751
		2.05422	0.689555	0.89922	1.05952	1.38882
		0.959508	1.54164	0.857698	2.17779	0.750189
		1.24936	1.57696	2.13741	1.53171	1.26013
		1.16493	1.20233	0.660168	2.96701	1.20189
		1.6915	2.77741	1.94306	1.42221	0.806112
		1.64208	1.83418	1.07194	1.27527	0.933243
		1.75823	1.82592	0.885346	1.18894	1.37982
		1.23629	2.43969	1.81511	2.68879	0.973924
		2.25639	2.34338	2.10762	2.06199	2.17087
		1.27443	2.49368	2.33326	2.40609	1.4309
		1.22311	1.68538	0.860798	2.37947	0.960584
		1.81741	1.83124	1.67162	2.30922	1.41033
		1.03636	2.49444	1.01749	2.21005	0.405512
		1.39447	1.65072	0.588612	2.60193	0.857513
		1.86366	2.38734	1.46385	2.24283	0.911523
		1.62218	2.15889	1.31786	2.08386	0.847755
		1.07343	1.17749	2.15861	1.10848	0.937947
		1.59084	1.42937	2.62795	1.39507	0.763135
		2.36561	2.33497	0.863859	1.19094	1.16616
		0.798746	1.79475	0.851376	1.32713	0.916704
		1.04832	1.08788	1.58983	1.56866	0.823003
		1.90468	1.96907	2.07766	2.32536	1.2602
		2.11542	1.43915	1.74903	1.72122	1.19948
		1.00564	1.77452	1.67747	1.43331	0.973692
		1.15303	1.18382	1.54877	1.98878	1.33075
		1.308	1.25964	1.22169	1.30004	2.10572
		1.90137	1.32349	0.359056	3.18322	1.80249
		1.64728	1.67141	1.17096	1.98391	0.866683
		1.70819	2.01907	1.20823	1.2912	1.35164
		1.08576	1.37637	1.71787	0.555856	0.811692
		1.17582	2.0524	0.893639	1.33924	1.48833
		1.73392	1.05126	1.16597	2.79232	1.24954
		1.2263	1.90796	1.45681	0.959141	1.51018
		1.43274	1.98054	0.451534	1.04795	1.06549
		1.43405	1.56553	0.576224	1.1892	1.07889
		1.12169	1.11266	0.556088	0.497318	1.78751
		1.3862	1.63295	1.1347	0.934726	1.86604
		0.68858	0.966137	0.801399	1.08206	1.35198
		1.46549	2.14815	1.57279	3.25869	1.10698
		2.43886	1.92906	0.62186	1.88981	1.39816
		1.35016	1.18939	0.879695	1.80799	1.29312
		1.48816	1.87825	0.839002	0.796238	1.97261
		1.18323	1.33576	0.587617	0.542432	0.989512
		1.16812	3.69007	1.08899	1.06887	0.675948
		0.582347	1.71736	1.86148	1.23398	1.20717
		1.45738	2.44656	1.16289	1.9424	0.896126
		2.02424	1.36091	1.15674	1.49625	0.952662
		1.17962	2.39825	0.556432	0.554457	0.743875
		1.28062	2.46721	2.11651	1.00666	1.10842
		0.890114	1.74683	1.99287	0.663463	0.782525
		1.51918	1.4705	0.359056	1.44957	0.970006
		1.25188	3.30575	0.942706	0.814526	0.91176
		0.979038	1.74157	0.892251	0.998427	1.10676
		1.58949	1.41348	0.812952	2.39796	1.30248
		1.47943	1.32841	1.31401	0.893305	1.0201
		1.29971	0.769582	1.12741	1.21775	1.71031
		1.23751	1.44693	1.19542	1.2412	1.46041
		2.01574	2.26751	1.76413	2.02901	1.68363
		1.81885	0.934228	1.0365	1.14105	1.72165
		1.01334	1.57666	2.28025	1.05957	1.34701
		3.24767	0.866076	1.07852	1.1149	1.25969
		1.76847	1.67923	0.451534	1.22726	1.67137
		2.16893	1.92104	1.05467	0.78219	1.00916
		1.72684	0.946179	0.789663	1.21558	1.26666
		1.93691	1.97802	1.85557	1.42385	0.888575
		1.56848	2.05507	1.85648	1.95227	1.07134
		1.47115	2.48788	0.831753	2.16697	0.741597
		1.11981	2.35731	0.979812	0.992796	0.978774
		2.56843	1.60548	0.529313	1.06524	1.83032
		2.09237	2.39322	1.10861	1.2873	1.54988
		1.73793	2.10639	1.66777	1.52499	1.53373
		0.827867	1.74645	2.41426	1.31604	0.865172
		1.58491	1.65877	1.35154	0.977285	1.36885
		1.93951	2.07609	1.15982	1.47351	0.633399
		1.11278	1.28678	1.01632	2.1782	1.08379
		2.45109	1.3242	1.06979	0.984169	1.15662
		2.16585	1.4958	0.717914	2.12744	1.84083
		2.73445	1.76715	0.925058	1.72483	2.17502
		1.49522	1.40035	0.973858	0.838948	1.25917
		1.71736	2.90872	0.936395	1.32393	1.26248
		1.70505	2.51784	0.802013	2.74806	1.63499
		1.94388	1.87502	0.803461	1.3451	0.815123
		2.50878	1.56436	0.752277	0.963954	1.16432
		0.715394	1.81671	1.08281	1.28992	1.85057
		1.49613	1.61228	0.847921	1.30229	0.771514
		1.54289	1.87947	1.48121	1.0747	1.09197
		1.72095	2.2889	0.645614	1.80647	1.24504
		1.685	0.83249	1.59459	1.66385	1.15341
		1.21569	1.29678	0.833647	0.987494	1.02285
		1.80456	2.17721	1.02809	2.15438	0.458476
		2.87628	1.1848	1.29879	1.05536	1.48296
		1.55832	1.25159	1.52931	1.50608	1.49263
		1.24086	1.63146	1.12961	1.94494	1.68782
		2.97714	1.22565	1.01484	1.20913	1.48724
		2.07113	1.79428	1.1662	1.23239	1.50568
		2.43704	2.04144	1.18179	1.04191	0.840512
		1.47617	0.827982	1.88815	1.3664	0.540452
		1.15282	0.501938	1.38174	0.913779	1.15908
		1.54898	1.26585	2.36586	0.980735	0.869093
		1.45654	1.1482	0.932013	1.78224	2.10872
		1.46257	2.22701	1.77158	1.38807	0.645614
		1.2869	1.02942	0.716274	1.25824	1.30659
		2.77899	2.45963	1.03757	1.40515	1.9948
		1.67233	1.73504	1.01774	1.72345	0.90658
		1.15973	2.24077	0.921112	1.5122	1.34985
		1.53648	2.54819	1.52523	0.907776	0.977682
		2.17443	1.84117	0.973599	1.46495	0.668407
		1.25215	1.82023	1.05607	0.89441	1.74702
		1.18978	1.79459	1.50358	1.00036	1.21045
		2.97677	1.86032	1.19114	1.1717	1.18067
		0.918909	2.46255	1.10407	1.02838	2.41855
		1.85929	1.2649	1.17993	1.08159	2.95498
		1.15491	1.57026	1.00567	0.915611	0.881668
		1.51698	0.903423	0.846791	0.797758	1.96451
		2.67641	0.740792	1.74927	1.08326	1.94647
		1.55169	1.59025	1.07157	1.36981	1.47025
		0.693782	3.17968	0.876817	1.00925	1.02995
		0.902456	2.34609	0.621991	2.20216	0.78721
		1.63108	2.04892	1.42288	1.34067	1.09188
		1.42702	0.671938	0.359056	1.70586	0.876482
		1.93418	0.918553	1.05373	1.42131	0.956358
		1.24887	0.972085	0.621991	1.23731	1.0233
		1.81869	1.36275	0.850022	1.62885	0.657356
		1.49366	2.10808	1.73997	1.47305	0.84211
		1.1141	1.26037	1.02808	1.50201	1.17656
		1.7065	1.94126	0.793961	1.96374	0.71575
		1.7745	0.808111	1.5987	1.42463	2.69612
		1.24609	1.41781	1.94421	1.7317	2.00752
		1.43723	1.93502	1.80625	1.93377	1.05313
		2.05185	0.896473	1.99731	0.850333	1.27593
		1.22694	1.22936	1.68916	1.69919	1.08907
		2.06846	1.34443	1.45734	2.87208	1.16206
		1.38816	1.76317	1.58125	1.68466	0.918484
		2.27393	0.976265	0.748648	1.06624	0.809075
		2.5517	1.76708	1.65626	1.14871	0.76257
		1.24772	3.70881	2.30572	1.60973	0.64643
		1.44001	2.33789	1.05131	1.62772	0.966821
		2.27182	2.64832	0.908629	2.00991	1.32079
		1.16732	2.21127	1.17625	1.93813	0.528951
		1.42918	2.49714	0.99358	1.2268	1.11829
		1.37024	1.54973	1.4893	1.95913	0.708649
		0.834687	1.3675	0.652196	0.982159	0.853886
		2.22311	1.5873	1.20101	2.00556	1.06797
		1.21847	1.23889	1.22935	1.86829	1.21597
		1.53545	2.807	3.21585	1.42842	0.856062
		2.49264	2.48764	1.8243	1.52264	1.40822
		1.61007	1.07678	1.25764	1.67005	1.48384
		2.58029	1.25518	1.19004	1.90467	0.888333
		1.63224	1.32364	1.13537	0.76319	1.85789
		0.458476	2.26984	1.47069	1.35408	1.2447
		1.41579	2.64248	0.982967	1.62515	1.69251
		1.63363	1.43814	0.721518	1.41624	1.15341
		1.60816	0.977	0.721889	2.02686	2.19481
		1.17459	2.23478	1.38776	2.45	0.766773
		1.6365	1.43675	0.866592	0.841324	1.71362
		1.27178	2.21893	0.975176	3.06946	1.00031
		0.834517	1.87937	2.05535	1.00139	0.883593
		1.2109	1.56557	0.977065	0.725946	1.13718
		1.43923	1.07546	1.41857	0.593064	0.746683
		1.75074	1.94253	1.04744	1.42087	0.956225
		1.364	1.39978	1.04757	2.20087	0.958614
		1.63032	1.36637	1.86584	1.31977	0.562535
		1.25218	1.99706	1.91028	1.13513	1.132
		1.76018	2.68511	1.2871	2.05791	0.718637
		1.95029	2.64055	1.47358	1.34454	0.986665
		1.4338	2.51315	0.713556	1.15734	0.965905
		0.818857	2.09152	0.639778	1.29974	1.23894
		1.08672	2.33897	1.69675	2.38793	2.37943
		0.837628	2.19563	1.66716	1.88422	0.977251
		2.2334	3.56988	1.41987	1.71795	0.893552
		2.34789	1.23492	1.15828	1.26835	0.78721
		1.34873	1.81682	1.35754	1.75591	0.895108
		1.51494	1.78683	2.06851	2.34135	1.05433
		0.581176	2.6881	1.01312	0.742699	1.13456
		2.046	2.07093	1.66772	2.17879	0.874371
		1.13928	2.21446	1.15772	1.60348	0.491071
		1.66626	1.06748	0.974072	0.871298	2.08897
		3.20068	2.68693	0.840266	0.671684	0.69102
		1.55647	1.93927	1.42013	0.476971	1.55174
		1.77222	2.07771	1.39824	1.83039	0.593436
		0.805323	1.65139	1.73296	1.59181	1.18068
		1.35701	1.99836	1.13941	0.779811	1.45289
		1.25036	1.37043	1.06893	0.990776	1.18296
		1.59151	2.28982	1.79663	1.1734	0.679374
		0.73995	2.15606	1.09846	1.58013	1.1285
		2.3259	2.48532	1.06588	1.18836	1.12231
		1.30802	2.32578	0.749762	2.37867	0.725748
		0.703601	1.42912	1.3037	1.29147	0.59374
		2.02635	1.37174	1.50493	1.17348	1.33041
		1.09416	1.04383	0.878021	1.09549	0.864196
		1.35018	2.25654	1.19913	1.77656	0.935361
		1.14358	2.21266	1.76086	1.58516	1.34506
		1.94195	1.40604	1.54194	1.21791	0.946035
		1.38433	1.91162	1.41484	1.41424	0.789701
		2.24991	1.319	1.42193	0.891607	1.296
		0.954982	2.97212	1.77856	1.59734	0.950984
		1.9974	2.21847	0.698085	1.87885	1.37033
		2.73309	1.51187	0.897939	1.80886	0.405512
		1.62362	1.22735	1.81035	1.38437	1.04622
		1.23675	1.12893	2.03144	0.949524	0.717685
		2.11405	1.37078	1.8087	2.06313	0.794507
		1.167	1.00705	0.931707	1.10562	0.847019
		2.20219	2.11226	1.00325	0.76487	1.25619
		2.08447	0.866526	1.81242	1.23199	1.14091
		1.5735	2.11182	1.86269	0.82226	0.705818
		1.26678	1.39263	1.50644	1.90516	0.640227
		1.45223	1.32168	2.42479	1.07649	0.658193
		1.55303	1.62895	1.22784	0.983978	0.949716
		2.31607	2.184	1.27298	0.783832	0.89723
		1.73829	3.47429	1.41709	1.13421	0.562535
		1.50393	1.27633	1.32461	2.0867	0.743565
		0.923277	1.69391	1.35929	0.968967	1.26677
		1.6755	1.41389	0.743133	1.36848	1.40367
		1.06041	1.64668	1.52382	2.11981	0.990307
		1.51694	1.55616	1.70482	1.30607	1.82299
		2.64584	1.29465	1.90379	0.7735	1.48934
		2.04536	1.25307	1.82509	1.29306	1.59816
		1.44911	1.60289	1.37862	2.42941	0.86407
		1.8116	1.21152	1.08348	1.5145	0.815123
		1.36733	1.81211	0.815404	2.71629	1.47348
		2.31212	2.68848	2.24516	1.3952	0.991939
		0.885127	1.84037	1.77312	1.63572	0.514169
		1.28183	2.23076	1.49492	2.11296	0.587202
		1.14829	1.2025	1.65212	2.6463	1.11275
		1.16573	1.1459	1.49771	0.961254	0.907149
		0.860542	2.17101	0.91674	2.18395	0.750392
		2.42632	1.15761	1.65128	1.22053	1.65044
		1.74055	1.00861	1.34279	2.2228	0.729564
		2.82483	1.78295	1.3812	1.09917	0.983909
		1.03045	2.01032	1.43197	1.03365	0.776106
		1.05939	1.93591	0.854409	1.36807	2.2696
		1.34926	1.60508	1.43923	1.85145	1.32329
		1.70305	1.54776	0.897624	0.960755	1.45254
		1.32309	2.00249	1.31557	3.30901	0.723989
		1.70988	2.14937	1.28657	0.948047	1.98053
		1.4472	0.909985	1.30215	1.32608	0.728596
		2.34462	1.95959	1.75426	1.45935	3.077
		1.15138	0.716821	0.818157	1.35127	2.54108
		2.67504	0.702113	2.05775	1.35957	1.41856
		1.933	1.89592	1.17615	1.42269	0.815374
		0.678228	1.59568	0.602551	0.831491	1.30626
		1.75389	1.62068	1.06406	0.917831	1.11141
		1.46712	1.40053	1.58178	1.61885	2.1268
		1.42813	2.34595	1.20055	1.51915	0.813938
		1.65609	0.933647	2.36758	1.54047	0.903559
		2.37289	1.28108	1.14053	0.701118	1.28904
		1.27648	1.23178	1.15552	0.892891	1.33446
		1.72417	2.13726	1.5577	0.934836	1.04051
		1.36774	1.57941	1.27404	1.72988	1.61863
		0.975563	1.94087	1.36493	2.42306	0.526617
		1.68358	1.55346	1.49989	1.25549	1.34855
		1.56184	1.67064	1.35462	1.63849	1.51042
		0.840959	1.592	2.01525	2.13803	0.861829
		1.16516	1.02889	1.41116	1.57411	0.77558
		0.946414	1.64167	1.04039	2.41783	1.44598
		1.76459	0.984575	0.978914	1.1853	0.959464
		1.70949	0.632936	2.23273	0.803508	1.74
		1.6992	1.13872	0.823862	1.41729	1.33591
		1.29356	2.9842	0.684305	2.20713	0.581414
		1.81686	3.46661	1.62384	1.99392	1.0855
		1.68845	0.783705	1.10478	1.31598	2.18945
		2.1792	2.65913	2.43189	0.405512	0.920266
		1.86719	0.882571	1.88653	1.44565	2.23509
		1.30242	3.04446	1.1199	0.767798	2.27913
		1.01797	1.31196	0.94968	0.933764	1.39069
		1.68071	1.72919	0.739108	2.59716	1.3075
		1.52432	2.22718	1.07293	0.801636	2.23553
		1.42175	1.70573	0.66999	2.25338	1.64485
		0.901266	0.789713	1.10033	2.47832	0.788789
		2.47514	1.22332	1.3243	1.69166	0.965392
		1.10962	2.60834	1.43839	0.634245	0.944471
		1.12804	2.91378	1.30822	1.38063	0.953623
		1.86339	1.22472	1.19539	1.32706	0.548013
		1.3989	1.78187	1.34472	0.405512	1.15954
		1.36542	1.2115	1.42432	1.37001	1.46931
		1.02125	1.69358	0.900554	1.25194	0.946372
		1.46886	1.10194	1.10335	1.49843	1.5203
		0.789396	1.22259	0.957513	1.51806	1.00157
		1.28728	1.73676	1.44312	1.34614	1.52846
		1.94207	2.60165	0.887513	1.67274	0.935048
		1.80866	1.05996	0.884932	1.13144	1.20411
		0.813967	2.03876	1.33411	0.781371	0.782802
		1.28252	1.73188	1.65085	3.53576	1.05425
		2.30847	2.49993	1.29019	0.359056	0.769643
		0.501331	1.2384	1.53449	0.944525	1.61816
		1.35174	0.743133	1.18531	1.46697	0.443609
		1.1131	0.497318	1.13523	0.642759	0.883291
		1.08659	1.56798	1.09148	1.2871	1.34855
		2.14804	2.62587	0.797277	1.32532	0.973952
		1.39482	0.840436	0.989766	1.1621	2.12464
		0.814813	2.81825	0.762585	1.39553	0.607991
		0.997823	1.28989	1.32147	1.10403	0.874987
		1.41938	0.95421	1.95115	1.9903	1.82217
		0.844213	1.9996	0.690202	1.18061	1.26435
		1.40772	1.92819	0.687283	0.866078	1.21967
		1.52058	1.37647	1.07345	0.733964	0.937655
		1.12098	1.56132	1.13773	1.11716	1.72197
		1.43586	0.983039	1.11051	1.01121	1.27695
		1.66686	1.55925	1.0138	1.16896	0.933041
		1.02433	1.88547	0.912271	1.87295	1.14731
		2.14401	1.46524	1.79547	0.727271	0.598205
		0.857362	2.78661	0.608945	1.00292	1.29506
		1.57906	2.43739	0.716575	1.83001	1.3485
		1.06889	1.37861	0.693769	0.888492	1.57156
		0.709861	2.09253	0.6461	0.565221	1.09753
		1.00424	1.60525	0.833601	1.12866	1.26499
		1.03467	1.15101	1.35375	1.29336	1.08281
		1.3645	1.96531	1.33977	1.11929	1.67819
		0.914143	2.32266	1.36358	1.58015	1.13396
		1.32494	1.8624	1.20053	0.796421	0.941163
		3.17683	0.590301	1.38498	2.05687	1.41293
		1.38085	1.00902	1.99156	1.21222	1.27332
		1.67445	0.701612	0.796332	0.703601	0.910079
		0.789141	0.884561	2.07914	1.28618	1.16432
		1.70946	1.45086	1.53263	2.40421	1.32347
		1.48564	2.66929	0.920288	1.55418	0.875459
		1.37024	2.28546	1.09328	1.53184	1.65707
		2.11649	2.17321	1.5736	1.03659	0.691719
		1.62177	1.51425	1.77574	0.91454	2.06749
		1.52557	1.11548	1.41733	0.756696	1.34253
		1.24672	2.45605	1.397	0.693604	1.12245
		0.896687	1.31117	1.26637	0.719559	1.06624
		1.5423	0.913159	1.7141	1.0531	1.22124
		1.02997	1.49395	0.84207	1.24359	2.64085
		0.844763	2.0444	1.23182	1.14171	0.923061
		1.63765	1.59372	1.01085	1.29163	1.72401
		2.143	2.11112	0.9109	1.34544	0.958878
		2.00207	0.668407	1.36494	1.19428	0.804668
		2.51377	1.59977	0.935361	1.2397	1.45246
		2.17879	1.04005	1.7132	1.12766	2.63583
		2.127	2.97181	0.713254	1.85456	1.64284
		1.82903	1.57302	1.86313	1.18054	1.80524
		1.68172	1.94894	1.19787	0.939271	0.59842
		0.709409	0.550452	1.0632	1.39297	2.38808
		2.80763	1.11655	1.02179	0.620527	0.690232
		1.17191	0.824445	3.23776	0.9925	2.03209
		1.48827	0.769573	1.63227	1.68961	0.676365
		0.914126	1.37739	0.359056	0.833612	1.89443
		1.15047	1.93322	0.923314	1.76461	1.15813
		1.66411	1.75343	0.903654	1.0746	1.54587
		1.4683	2.41706	1.65142	0.48256	1.07282
		1.63148	2.12627	1.28965	0.677326	0.359056
		2.31331	1.6909	1.5465	0.850854	1.38004
		1.82571	2.67574	1.79081	1.04516	1.2218
		1.19627	1.6932	1.35699	1.04926	1.45576
		1.50193	2.82501	0.859442	0.681059	1.26937
		1.53974	2.41509	1.03422	0.359056	1.35783
		1.00635	2.24215	0.806646	0.405512	0.556602
		1.23322	0.969043	1.31498	1.21899	0.695006
		0.927137	2.94429	0.859986	2.61981	1.07677
		1.25268	2.82647	1.47866	1.70792	1.71784
		1.55861	1.42718	1.74404	1.09075	0.858001
		0.960668	4.08117	1.06235	1.64711	1.55601
		2.46117	1.67018	0.527271	2.55526	0.359056
		1.07783	0.769977	1.0216	0.926061	1.26137
		1.38893	1.28849	2.64544	0.671684	1.26509
		1.76562	2.21683	0.901456	0.828509	1.24847
		1.12743	2.57217	1.18771	1.12115	1.36835
		2.41404	0.800986	1.14974	1.82201	1.16945
		2.14211	1.70181	1.28726	0.843324	1.07967
		1.26053	2.55532	1.23286	1.36423	1.34592
		3.0379	2.44744	1.71271	0.816385	0.596381
		1.77085	1.72042	1.37121	1.0302	0.907167
		2.16115	2.14431	1.61233	0.476971	1.9574
		1.68445	3.02693	0.927028	0.614905	0.656203
		1.82534	2.26258	1.62434	0.98495	0.88275
		2.81771	1.81472	1.16336	0.863639	0.771984
		2.22976	2.69318	1.7401	0.562535	0.845891
		1.78965	1.26134	1.84882	1.35552	1.22257
		2.29429	1.74291	1.09263	0.910497	0.606553
		1.30987	2.71842	0.759952	1.19911	1.03422
		3.33154	2.29457	1.26472	1.50425	0.68334
		2.06597	2.47832	1.9682	1.3928	0.736455
		1.34798	3.1522	1.69378	1.50799	1.52217
		1.40804	3.37214	1.82385	1.49014	0.929964
		2.63981	1.98669	1.01441	1.06688	1.0982
		1.80884	2.84937	1.11303	2.60846	1.03724
		2.62296	1.85946	0.993194	1.00484	1.38132
		3.44195	2.70801	1.25174	1.07729	0.443609
		1.3201	2.00242	1.49878	1.34427	1.88315
		1.35135	2.05765	0.359056	1.03915	0.938673
		1.52605	2.91712	1.07123	0.703601	0.953108
		1.47213	2.30797	1.63548	1.24236	2.00521
		1.1798	2.71793	1.34459	0.957161	1.56778
		1.29851	1.68053	1.78386	1.3263	1.32461
		1.25767	3.08061	1.74584	1.08139	0.701093
		1.39484	2.45171	1.56533	1.42268	1.49873
		1.67056	1.53224	1.06885	1.08658	0.966838
		1.51828	2.13206	0.898637	2.13149	0.645614
		1.98256	1.66436	1.46578	0.817404	1.38591
		1.30716	2.08652	0.667135	0.839411	0.658193
		0.952412	1.80172	1.21938	1.25032	0.819382
		2.82346	2.01696	0.891309	0.635608	2.96455
		1.01219	1.15501	1.20378	1.22638	0.68105
		1.42262	1.95976	1.35924	1.06434	0.727598
		1.18881	2.00376	0.710334	1.01897	1.09693
		1.28873	1.54984	1.47585	1.06148	1.32231
		2.34079	1.34087	1.18569	1.18569	1.12141
		1.58039	2.01022	1.19413	1.56656	1.54039
		1.70746	1.95745	0.685318	1.91633	0.64124
		1.428	2.13103	1.12055	0.810253	2.07004
		1.37352	2.12743	1.77071	0.810003	1.46644
		2.5009	0.463193	0.866402	1.04765	0.91904
		0.978906	1.87648	0.856952	0.693604	2.50013
		1.7701	2.83628	1.20247	0.588366	2.02859
		1.12484	3.06959	0.695112	1.00317	1.69223
		2.72955	1.45686	0.443609	1.32877	1.53281
		1.17727	2.87341	1.19289	2.03783	1.38874
		1.96556	1.4252	2.4211	1.79791	1.93245
		1.64197	1.70217	0.991414	1.06603	1.36854
		2.03586	1.58803	0.747667	0.633405	1.58367
		1.27902	1.74859	1.3792	1.41238	1.25376
		1.33966	1.21107	1.07798	1.11286	1.50085
		1.56978	1.40626	2.16304	1.09861	2.04551
		0.860034	1.34663	0.721003	1.46733	0.810253
		1.44562	1.43386	0.910841	0.676365	0.556432
		2.85283	1.25987	0.921779	0.929272	0.905576
		1.24282	2.85879	1.23074	2.22296	1.0523
		1.96731	2.74128	1.99308	1.49367	1.50512
		1.63597	1.92816	2.4093	2.81356	0.948562
		1.68849	2.84684	1.1183	0.87648	0.405512
		1.33622	2.50682	1.95959	0.990307	0.977451
		1.52265	1.67471	1.34272	1.02603	1.32414
		1.0196	1.89985	0.977459	0.976565	2.19836
		1.41039	1.63104	1.27963	1.22542	1.07159
		2.16176	2.81258	1.25787	0.48256	2.14619
		1.54962	1.63958	1.05036	1.99303	0.99788
		1.84322	1.67855	1.93672	1.9121	1.07786
		1.7232	0.750189	0.925312	1.34407	0.926602
		2.38775	1.9118	1.67273	1.90768	0.895931
		2.19189	3.20965	1.28314	1.48198	1.25272
		1.33426	2.43418	0.930992	2.1481	1.25193
		0.723897	0.703601	1.29943	0.666099	1.53776
		0.584171	1.55819	1.65127	0.735577	0.883291
		0.405512	3.52469	0.443609	1.42384	0.878098
		1.28165	0.992614	1.27595	0.818608	0.945755
		3.54421	2.40914	0.359056	1.32531	0.813917
		1.17754	0.747136	0.748876	1.19613	0.639778
		2.10592	2.41362	1.6281	1.25924	1.88557
		1.99179	2.46102	0.593064	0.919509	1.42604
		1.95566	1.98538	0.932964	1.17925	0.887917
		1.30893	2.33429	1.17064	1.42965	0.921112
		1.83425	0.958702	1.23272	0.550871	1.14579
		1.90468	1.84282	1.96614	1.48872	1.53711
		1.93281	2.42102	1.80333	0.933702	1.34989
		1.59948	2.12638	1.13674	1.35725	0.587617
		0.979349	1.09518	1.08466	1.37464	1.11009
		0.947477	1.10926	1.75347	1.36539	1.09549
		1.41844	2.85091	2.16558	1.30287	1.25202
		2.64171	1.32047	2.4092	1.17781	0.969798
		2.20928	1.71575	1.73448	1.16553	2.48285
		1.20616	1.45304	0.576629	1.28211	0.713924
		1.83868	1.7235	1.71101	1.7445	1.16017
		1.62403	1.95981	2.05422	1.05829	1.03674
		1.42841	1.72303	1.72504	1.05471	0.899416
		0.359056	2.18367	0.762997	1.49309	1.25692
		2.44032	1.82126	0.705252	0.652446	0.876437
		1.07481	1.34373	1.77808	1.57646	1.04343
		1.11868	3.48544	2.00561	0.911119	1.29582
		2.75015	2.05112	1.05486	0.637012	1.02018
		1.48724	0.854871	1.4433	1.21127	0.405512
		1.93128	2.30119	1.68818	0.791621	1.26615
		1.44804	3.57759	1.06065	2.08031	1.99562
		0.658187	1.65515	2.17671	0.847488	1.36067
		1.36627	2.29437	0.988841	2.14465	0.411032
		1.31585	1.08268	1.00719	1.04357	0.975641
		2.04882	1.41757	2.028	1.24542	1.23683
		3.006	2.13565	1.62737	1.10603	1.07506
		1.18496	1.45458	1.21206	1.15267	0.443609
		1.93203	1.86325	0.821138	0.757719	0.942459
		1.6259	1.31065	1.49522	0.988243	0.860484
		2.11387	1.40732	2.01559	1.08506	0.784909
		1.43159	2.17844	1.46487	0.877351	0.969255
		1.14509	2.88318	1.25415	0.827982	1.04703
		1.6507	2.88557	0.822745	1.11247	2.34962
		1.94113	2.26538	1.68017	0.572615	0.908886
		1.64351	1.83902	1.08417	1.10824	0.841128
		1.74095	1.32834	1.63683	0.556088	1.32754
		1.45863	2.02044	1.42894		1.171
		1.36073	1.77001	1.31124		1.16551
		0.713556	2.31183	1.76383		1.38969
		1.34295	2.23311	0.850452		2.01017
		2.15017	2.32283	1.38219		0.869586
		1.99598	1.65092	1.04744		1.32242
		1.25788	2.67992	1.3864		0.825566
		3.00143	1.47665	1.19743		1.40463
		1.53965	2.83965	1.08708		0.992391
		1.02945	1.45832	1.042		1.92481
		1.16179	3.53226	0.773436		1.37278
		1.31076	1.33724	0.627496		1.15679
		2.94602	1.94333	1.1394		1.31614
		1.37606	2.2922	1.10047		0.758335
		1.74017	2.11973	0.786952		1.45016
		1.29664	2.05419	1.57323		0.728202
		1.66246	2.6741	1.20303		1.0126
		1.39882	1.99668	1.84763		0.909665
		1.60015	1.41248	1.73564		0.990384
		0.959442	2.4778	1.24755		0.900024
		1.16477	3.38554	0.875976		1.18283
		1.89959	2.88416	0.801399		1.16484
		0.637012	2.59878	1.3199		1.24438
		2.22819	1.32052	0.405512		0.735083
		0.939446	1.275	1.35578		0.866001
		1.18847	1.41355	1.07465		1.18446
		2.02404	2.08516	0.642759		1.4633
		1.26442	1.57625	1.45745		1.67177
		1.33941	1.62255	1.22308		1.38864
		1.71189	1.61383	1.09797		1.36716
		0.92099	1.63658	0.994791		1.7677
		1.09446	3.41468	1.31625		1.23843
		1.26765	1.79601	0.91371		2.10656
		2.46087	2.89351	1.44291		1.92596
		0.97806	1.98898	1.08656		0.706689
		1.45584	2.00749	1.14435		0.930045
		0.501713	1.78504	1.07002		1.0895
		1.68617	3.36625	1.85355		1.81399
		1.00748	2.0491	1.17116		0.993122
		2.17567	2.18609	1.84648		0.904604
		1.20251	2.59156	1.80115		0.822745
		1.46196	1.81268	1.21545		0.568514
		1.172	1.81965	1.08348		1.92854
		1.10296	1.53608	0.535262		1.08348
		0.901812	2.12753	2.13482		1.45188
		1.0751	1.95956	1.02554		0.851589
		3.46085	1.6521	0.675948		1.53692
		1.47605	2.77706	1.4553		1.09163
		2.6014	1.74027	1.39515		0.517811
		0.875575	2.64822	1.4448		1.34239
		3.72354	0.952152	1.80871		0.405512
		1.65904	1.89384	1.43549		0.556088
		1.77055	2.10204	2.42946		0.810253
		1.30234	3.52318	0.75075		1.59545
		2.86322	3.22624	0.798306		1.66187
		2.1417	1.8321	0.876532		0.785764
		1.15014	2.26694	0.458476		2.30784
		1.37475	2.79426	1.7635		1.2394
		1.78974	1.72218	1.36978		0.973854
		1.67889	2.08897	1.19167		1.35092
		1.90932	2.19018	1.24609		1.30242
		1.92845	2.88423	1.90564		1.97804
		2.08096	2.29626	1.35026		1.48415
		1.50094	2.25339	1.19094		0.910365
		2.11797	3.18753	0.651477		0.405512
		1.94361	1.5657	1.07998		0.633399
		1.92317	2.11774	1.41725		0.937453
		3.40123	2.41755	0.719729		1.22816
		1.55218	1.23164	1.59234		1.15552
		1.15012	2.29575	1.61612		0.733039
		1.38176	2.71464	0.752532		1.02363
		3.85144	2.62822	1.36069		2.08611
		0.963591	2.6441	1.24638		0.754157
		1.06448	1.0874	0.967454		1.05126
		1.85875	2.18866	1.32564		0.825626
		2.27551	1.76755	1.46015		1.30394
		1.56317	2.09047	0.652196		0.98858
		2.06823	2.09251	0.405512		1.16413
		1.17969	2.11568	0.796002		1.15186
		1.42038	0.793763	1.01064		0.78721
		1.0527	1.38487	1.29945		1.33621
		1.27096	2.91212	2.20036		1.99901
		2.02379	2.41233	1.01188		0.411032
		1.62391	1.60574	1.53081		1.36871
		1.95491	2.42871	1.09218		1.15292
		1.71908	1.4989	1.0981		1.07822
		1.42827	3.16318	1.22998		1.37853
		1.03622	2.83101	0.812293		0.775864
		2.04247	3.69598	1.01887		0.829345
		1.25731	1.19672	1.46221		1.14905
		2.46663	3.12616	1.4393		1.26816
		1.55916	3.99303	0.961783		0.955149
		1.63148	1.61973	1.86464		0.726494
		1.45726	1.27939	2.02581		0.883199
		0.977256	3.33679	2.2672		1.2648
		1.97615	2.99894	1.60202		0.802414
		2.94134	3.66219	1.09549		1.67606
		1.52661	1.2165	0.587617		1.38874
		1.44872	2.50136	1.28105		0.559225
		1.9185	2.49935	1.66777		0.905483
		2.36659	1.34218	1.45396		0.683609
		1.99929	1.55361	1.06115		1.7778
		0.971044	2.89477	1.80191		1.17342
		1.19135	2.05795	1.12147		1.07825
		1.00848	1.27035	1.69514		0.779459
		0.865905	1.82651	1.61329		1.12502
		1.59652	2.46627	1.08981		0.501938
		1.65331	2.26908	1.2044		2.01857
		2.21362	3.26308	0.405512		1.02626
		2.30702	1.46768	1.48684		1.74383
		2.82359	2.34302	1.76884		1.10091
		2.42211	1.98717	2.18652		1.45387
		1.29963	2.20337	1.00452		1.48708
		0.83297	2.08678	0.85273		0.840766
		1.03731	2.41953	0.814594		1.16117
		1.74193	1.62762	1.94751		0.810701
		1.07134	2.58245	1.31405		1.01975
		1.26826	2.61854	0.871772		1.09041
		2.15215	2.22406	1.01075		1.03219
		1.73512	2.14201	0.818608		0.708649
		1.2667	1.29574	1.02075		1.01773
		1.83054	1.1293	1.28282		1.26457
		0.858128	2.092	0.919744		0.930941
		1.0696	1.71789	0.804685		0.910617
		1.82031	3.55865	1.23028		0.85664
		1.64437	1.76299	1.8839		0.965763
		1.44041	2.19305	1.04867		1.14806
		1.47663	1.65784	0.673939		0.851589
		1.60946	2.22139	1.12043		0.4701
		1.36648	3.60739	1.19531		1.87859
		1.03009	1.26909	1.45631		0.63945
		1.19619	0.463193	1.28741		0.697667
		0.857513	2.39525	0.869047		0.635322
		0.845925	2.28551	0.832478		1.54678
		2.0034	2.12961	1.2142		1.54552
		1.40446	2.69261	1.31238		0.768739
		1.66768	2.65816	1.22603		1.21907
		1.29147	2.9486	1.12058		1.19631
		1.56257	1.1298	1.40611		0.595236
		1.13404	2.47471	0.581176		2.088
		1.35162	2.91322	1.35607		1.00571
		1.0737	1.7387	0.867382		0.871503
		2.82402	2.10755	1.42479		1.24192
		0.739279	1.49414	1.18218		1.8115
		2.9812	2.05923	1.56079		0.731772
		1.27457	2.19319	1.18051		0.458476
		1.01405	1.51734	1.47818		1.36834
		2.00433	1.78398	0.664279		0.927345
		1.96654	2.9711	1.35304		1.37565
		1.99165	3.54021	0.630306		0.96789
		0.585678	2.12786	0.859245		0.576174
		1.70821	0.655974	1.41833		1.55892
		0.830184	2.30899	0.99791		0.901825
		2.3051	2.57741	1.22374		0.82226
		5.12474	0.695819	1.3285		0.93252
		1.97376	0.768242	0.804077		1.31021
		1.15637	1.10929	1.12714		0.73995
		1.1291	2.06067	1.60373		1.03079
		1.34849	2.04558	1.0514		1.24437
		1.49921	2.01585	1.22419		0.568396
		1.31351	1.80196	1.84472		0.623626
		1.383	1.66696	0.928333		0.359056
		3.40027	1.85974	2.51796		2.5372
		1.4438	2.05718	0.688753		1.98375
		1.43367	1.40769	0.712358		2.56611
		3.04923	2.61363	1.31615		0.837492
		0.608306	1.72432	1.24059		1.38605
		2.5374	2.44009	0.749058		1.64728
		1.8291	1.38634	0.985087		1.16477
		2.90765	2.27066	0.836647		1.98373
		2.93646	2.51832	0.451534		2.31793
		1.17985	1.9718	0.568396		1.35809
		1.35571	0.670986	0.729564		1.55806
		1.75353	1.54853	0.937604		2.53775
		1.4791	1.86388	0.845882		1.83146
		0.821412	2.50615	1.45015		1.4105
		1.4656	1.34205	2.26193		0.697241
		0.852887	1.91615	1.2326		1.63258
		1.76579	2.10547	2.05497		0.980263
		0.775261	2.77438	1.53575		2.69123
		1.78797	1.21587	0.860925		1.08662
		2.95966	2.03022	1.09968		1.65837
		1.02142	2.22521	1.45644		1.42407
		0.707457	2.22824	1.01929		0.675721
		1.71836	2.75598	0.997655		1.37402
		1.13582	1.88345	0.501938		0.978367
		1.03516	2.14477	1.02363		1.93833
		1.92908	1.27593	1.3696		1.80663
		1.83196	1.63165	1.57229		1.83259
		1.78973	2.10196	1.0008		1.26174
		1.81422	2.59641	1.18694		0.735502
		2.08622	2.14014	1.32182		1.71528
		1.16777	1.99474	0.913599		0.820046
		1.25498	2.12718	2.10473		0.670394
		1.39764	1.80893	1.42538		1.92142
		1.90735	1.56835	1.4324		2.18259
		1.10095	2.86206	1.63993		1.41358
		1.24476	1.78194	1.28264		1.23687
		1.30016	1.86195	0.737307		1.54706
		2.39524	0.927028	0.704105		1.84212
		1.14725	1.07755	1.41929		0.807046
		0.794806	2.22778	1.15575		1.22827
		2.3021	2.55523	1.29541		0.988136
		1.32749	0.903292	1.43292		1.98146
		1.25577	1.47451	1.24246		2.35274
		1.12272	1.47267	1.51566		1.34844
		1.5923	1.18281	2.24454		0.556088
		1.30402	2.10264	1.01572		0.929114
		1.1547	1.2821	1.60021		0.994244
		3.33567	4.85405	2.03897		1.39785
		1.28879	2.02235	1.18189		2.79549
		2.154	0.636911	1.11841		1.04624
		2.92136	2.10329	1.22788		1.25212
		3.00569	1.78194	1.71658		0.983424
		2.31632	1.79546	0.818608		1.35886
		1.55251	5.08368	0.844763		0.885918
		2.41494	1.715	1.45704		3.29092
		0.829904	2.34308	0.988629		1.54222
		1.21514	1.45662	1.50268		2.06032
		2.50329	0.590301	2.36803		1.84789
		0.709195	1.8637	2.01893		1.69502
		1.74844	1.51911	0.748876		1.87805
		2.25019	2.67639	0.999007		1.09693
		1.10704	3.84551	1.34549		1.89692
		1.52584	1.48949	1.1488		1.33051
		1.72888	1.89859	2.38712		1.62401
		2.10293	1.7505	1.53357		1.41027
		1.37225	2.4563	1.74368		2.54295
		1.47196	3.95873	1.52984		0.587617
		0.932509	1.30919	0.896433		0.83756
		1.9075	1.80081	1.31114		1.1134
		2.62908	2.01585	1.13782		1.07617
		2.08415	1.65342	1.87317		1.13218
		3.08399	2.41307	0.871814		2.34621
		2.06679	4.39887	1.71496		0.895663
		1.99116	2.21936	1.83309		1.27974
		1.37514	2.28421	1.7122		1.77276
		1.8995	2.1339	0.736935		2.26301
		1.25229	2.97042	1.33639		0.98461
		1.47761	2.04377	0.566287		1.63892
		1.06242	1.28133	1.39916		1.46377
		1.28226	2.77808	1.79685		1.35203
		1.80528	1.78184	1.30845		0.990785
		0.608945	0.879004	1.43442		1.64236
		1.10851	2.11847	2.2489		1.46788
		1.76212	2.15487	1.63616		1.63635
		1.84614	0.665748	2.88106		1.70428
		1.19048	1.46191	1.26974		1.84725
		1.30526	1.75782	1.3217		0.623327
		1.92031	2.1146	1.98087		1.55734
		1.13403	2.98894	1.43702		1.77862
		1.36918	1.77986	0.952179		2.76215
		1.76859	1.7594	0.607904		0.998525
		1.33189	2.2201	1.19945		0.8883
		1.45065	2.70296	1.23871		1.99197
		1.35023	2.80212	2.75722		1.88798
		1.15695	2.80697	1.67552		2.0676
		1.33441	2.70182	1.24106		1.93875
		2.28403	2.65917	1.64691		1.1658
		1.47934	1.85849	1.23212		1.60685
		1.68439	1.44764	0.936052		1.22236
		2.01455	2.29295	0.888955		0.841692
		0.621323	2.54154	0.87274		2.4135
		0.607314	1.99615	2.57182		1.65516
		1.50375	2.6458	0.998084		0.780089
		1.5821	1.91209	1.14233		0.648034
		1.46687	1.84206	0.831877		0.981376
		2.19782	2.64296	1.23237		1.89191
		1.95171	1.7075	1.74988		1.74124
		1.47555	2.34325	1.46165		1.0781
		1.99926	1.55995	0.443609		2.08059
		1.83154	2.661	0.696925		1.30149
		1.28561	1.68109	0.942705		2.67391
		1.03743	2.01313	1.48318		2.09781
		1.31827	2.78675	0.814685		2.13227
		1.18835	1.5041	1.08377		1.28246
		1.28747	3.23725	0.87983		0.9469
		0.857698	0.95977	0.359056		1.63984
		1.34311	2.10028	1.55015		1.21711
		2.08163	2.67663	0.730047		1.96095
		2.25434	1.14438	1.33604		0.451534
		2.22654	2.19493	1.01114		2.02515
		1.48988	1.42355	0.741093		1.25106
		1.89456	2.93466	1.62042		1.49987
		2.31975	2.19662	1.16448		1.50918
		1.75325	2.59376	1.89399		0.99542
		2.11927	2.13455	1.27933		1.53559
		1.42617	1.86923	1.96234		2.09539
		1.66132	1.63097	1.49389		1.86486
		0.910841	1.8524	0.405512		1.14332
		1.02934	1.51094	1.96904		1.44213
		2.01291	2.71063	0.750392		1.29124
		1.08261	1.99488	0.867475		1.42299
		1.56427	1.26028	1.09693		1.89131
		1.42959	1.88044	1.56704		2.4463
		2.00461	2.53966	1.56719		2.11863
		0.762231	1.6827	1.64131		1.41859
		1.74645	1.96596	1.29061		2.64444
		1.46817	2.11957	1.37918		0.623327
		1.34259	2.71423	1.39583		1.24573
		1.7175	1.53738	1.77887		0.878008
		1.58579	1.82618	0.847329		1.87161
		1.41545	1.53853	0.9438		1.23812
		0.955895	3.09159	1.23376		2.34389
		0.411032	1.60712	1.41504		1.24615
		2.03529	1.7692	0.78935		1.8764
		1.60337	1.73951	1.50358		1.2131
		2.42065	1.60344	0.762585		1.66752
		1.81258	1.53524	1.10246		1.47015
		1.45494	2.17431	1.27498		1.18437
		1.62515	2.90211	1.83774		1.4953
		1.67369	1.8793	2.06853		1.20003
		1.90868	1.13222	2.05195		0.929335
		2.45884	2.02384	2.16025		1.25612
		1.51122	2.50657	1.73212		1.71938
		1.40463	1.47136	2.03996		2.00822
		2.61129	2.06206	1.3125		1.42084
		2.11795	1.87775	1.18971		0.736503
		2.09959	2.25954	1.18296		2.09432
		1.25095	2.84018	1.1836		2.23424
		2.08769	2.86047	1.4884		1.15848
		1.30222	2.24559	1.44347		1.7257
		1.34352	2.93074	1.98846		1.17385
		1.31625	1.47607	0.848821		2.20196
		1.57202	1.42189	2.41603		0.803345
		1.79179	1.51165	0.600547		1.21466
		1.13514	2.6704	1.76979		1.36355
		2.9421	2.1546	2.42025		1.38439
		2.37397	1.98896	1.71333		1.07814
		1.42022	1.98157	1.0042		1.56821
		1.26823	2.37195	1.02212		1.45684
		1.44762	2.24637	1.46888		1.59955
		1.0151	2.34774	0.669089		1.83204
		1.68114	2.42439	1.47177		0.940045
		1.53223	1.77071	0.458476		0.922032
		1.39281	1.91307	1.14065		1.57671
		1.99923	1.53711	1.3582		2.05341
		1.35337	2.53158	2.38972		1.22208
		2.5221	1.69414	1.37037		1.41353
		2.20116	1.98225	1.16822		1.70911
		2.21722	2.31532	1.42672		1.85197
		2.21613	1.26569	1.18334		1.37147
		1.96928	3.05625	1.22638		1.50585
		1.18446	3.02999	0.773079		0.91454
		2.83861	1.26054	1.39744		1.12422
		1.91593	2.59446	1.27821		1.0228
		1.30223	2.56677	2.46326		2.0395
		2.1739	2.02103	1.47171		1.27982
		1.48845	1.91055	1.10246		1.97067
		1.26767	0.748648	1.23549		1.84092
		1.29429	3.14193	1.49889		1.34901
		1.12205	2.14773	2.0663		1.57729
		0.933722	1.99432	1.30602		1.87288
		0.977923	1.92074	1.49368		1.44833
		2.1618	2.43117	0.94514		2.66496
		1.25757	2.09952	1.03136		1.61036
		1.2326	1.11866	0.986905		1.25683
		1.68699	1.44263	1.52936		1.34565
		1.59207	2.14009	0.89458		2.43303
		1.67978	2.25293	0.901825		1.73973
		1.85845	2.30988	0.690202		2.9841
		1.17316	2.73463	0.786476		2.60146
		1.43957	1.88666	1.68853		1.82917
		1.13498	1.55539	2.22804		1.57611
		1.36865	2.78905	1.08018		1.78825
		0.502535	1.80538	0.73933		0.774455
		1.79192	0.731635	2.26719		1.73363
		1.30885	1.69533	0.843153		1.96758
		1.09805	1.5229	1.2311		1.77008
		1.23109	1.02555	1.13567		1.80755
		1.9244	0.943654	0.837581		0.879531
		0.961636	2.38441	0.676365		1.86994
		1.47872	2.40101	1.12555		1.14843
		1.13484	2.03668	0.790491		1.43541
		1.10193	1.23421	0.770601		1.26504
		1.72517	2.184	0.994228		1.17796
		2.22356	1.56515	1.12445		1.16492
		2.03604	2.49422	2.11168		1.57959
		1.1534	3.65335	1.10622		1.05424
		1.1739	2.00093	0.926653		1.05002
		1.90759	2.91994	0.782399		1.49101
		1.71997	0.745037	1.89785		0.834275
		1.70402	2.18938	2.00552		0.753323
		1.81608	2.75203	1.15059		1.06498
		1.65593	4.34134	2.37211		1.37357
		1.17704	1.29564	0.713231		0.937396
		2.55021	1.12567	0.7933		1.11627
		1.75589	1.4681	1.3201		1.84136
		1.84113	2.12358	1.59939		0.639778
		1.04051	1.31042	0.951785		1.05297
		2.132	1.34585	1.28384		1.34255
		1.63336	0.849996	1.26902		0.840823
		1.50873	1.89765	1.33566		2.95777
		1.93758	2.14387	2.10478		0.855334
		1.95656	1.79373	1.73946		1.38607
		1.54117	0.98579	0.818799		1.17648
		1.36284	1.94733	0.890293		1.36619
		1.59008	1.37014	1.90512		1.65397
		1.05607	2.45217	1.54151		1.65276
		1.34319	2.63014	1.74212		1.70714
		2.32422	1.91679	1.54811		1.07239
		1.26034	1.95983	1.42319		0.981042
		1.63465	1.5408	0.741716		2.07418
		1.02769	1.47786	0.980129		1.24201
		2.0303	2.20252	1.35446		1.62784
		1.92456	1.04063	2.09008		1.27509
		0.888734	1.49249	0.642759		1.68041
		1.57818	1.42166	1.83695		2.32153
		1.27371	1.00718	1.08323		1.43184
		1.52471	1.21549	0.78176		1.60781
		1.23593	1.62333	1.38421		1.40919
		1.34519	2.02979	0.675948		0.359056
		1.75876	1.28125	2.17302		1.55583
		1.51896	2.52298	0.842336		1.96297
		1.13916	1.72954	0.787428		1.20278
		2.49993	2.64624	0.928446		1.37882
		0.668407	1.83972	1.38563		0.837785
		1.56034	1.6772	1.1617		0.781609
		1.42463	1.4301	0.719729		0.997199
		1.31805	1.84933	1.28267		1.78113
		0.831877	2.21224	1.07259		0.629185
		1.76394	2.11348	2.18298		1.16672
		1.75826	2.6801	1.21077		1.36552
		0.59704	2.20375	1.12092		1.11771
		1.80742	2.18738	1.33161		0.443609
		2.11816	2.78253	0.535262		1.16221
		0.943258	1.92061	1.29169		1.2017
		1.99586	2.51576	0.895673		1.52174
		1.03898	1.15292	1.78725		1.08299
		1.71633	1.58095	1.3115		0.958386
		1.84645	2.25406	1.07197		1.73879
		1.40498	2.88789	0.881663		2.15624
		2.30444	2.23215	1.12753		1.85674
		1.20927	2.30108	0.4701		1.81536
		1.82545	2.0138	1.14698		1.77906
		1.34905	2.4407	1.97352		1.3327
		1.60183	2.51041	1.15729		0.999826
		2.24648	2.79383	1.24989		1.69214
		1.09339	1.62902	1.01789		1.41424
		1.14494	0.497318	1.14942		0.77667
		1.03674	1.26592	0.783808		0.81136
		0.652196	0.587617	1.02451		1.63943
		1.51664	1.79294	1.00935		2.28554
		1.23464	2.38333	1.14994		1.48558
		1.62523	1.6624	1.068		1.73843
		1.46133	2.58614	1.52917		2.31767
		1.76882	2.06123	0.802668		2.2719
		5.18665	1.77981	0.739265		1.94445
		2.39102	1.8636	0.762679		1.65516
		1.04272	1.76868	1.06983		2.10895
		1.65729	2.18285	1.22158		1.52692
		1.20528	1.56248	0.760591		2.20983
		0.952125	2.72528	0.793292		1.61234
		1.0634	1.89759	0.69102		1.77003
		0.726772	1.97295	1.53384		1.14397
		2.34571	2.5838	0.608079		3.17943
		2.09783	2.32307	1.56355		1.49984
		1.5916	1.6337	1.12473		1.507
		1.57142	2.45878	0.82094		1.85498
		2.11876	2.99107	0.957325		1.57045
		2.11208	1.49255	1.28657		1.16928
		0.642759	1.16488	1.4337		1.9144
		0.960546	1.71315	1.28641		2.10884
		2.38563	1.50134	1.05496		1.62049
		2.17727	2.56948	1.23368		1.62551
		1.70317	1.61338	1.1857		1.73801
		1.86342	2.47519	1.02807		3.79904
		1.06546	1.40039	0.966091		1.06143
		2.77621	1.90457	0.959493		1.07716
		2.7174	1.49363	1.75088		1.18896
		1.41094	1.68208	1.18542		3.52754
		2.88657	1.8598	0.911276		1.8461
		1.80388	0.763135	1.69921		0.675948
		1.71724	0.77651	0.927275		1.36762
		1.81669	1.54402	1.46511		1.34751
		1.71705	1.11	0.947697		1.06432
		1.92959	1.81295	1.00042		1.39
		1.995	2.97536	1.19539		1.36304
		1.1082	2.08819	0.897652		1.2006
		1.184	2.10755	1.07504		1.09004
		1.49543	2.97222	1.3546		1.31376
		1.40235	2.46927	0.701093		1.81355
		2.33612	2.97458	1.84193		1.55232
		2.26221	1.88049	0.99068		1.05872
		1.26678	2.3275	0.941043		1.14443
		3.44869	1.59804	1.03011		0.674923
		1.03125	2.41712	2.50655		1.00699
		1.76992	1.69884	1.51017		1.20763
		1.54314	1.91542	0.359056		1.1804
		2.35655	1.80902	1.077		0.978193
		1.42964	1.66427	1.42783		1.1885
		2.13469	2.02521	0.827875		1.38347
		2.54853	1.9021	1.2607		1.83928
		1.36672	2.13757	0.910004		1.50797
		2.15674	2.99181	1.09673		1.182
		2.33563	1.71655	0.866646		1.01951
		1.809	2.33299	1.28447		1.42174
		2.30004	2.15569	1.58862		1.09554
		1.31072	0.727357	1.53035		1.05531
		1.11482	1.55354	0.639096		1.4439
		2.93522	0.985606	1.73991		1.29883
		1.97973	4.28662	1.33368		1.67886
		3.18381	2.51285	1.7379		1.5876
		2.10713	2.29412	1.57539		1.8058
		1.4494	2.36629	0.926631		2.56747
		2.17148	2.14615	1.39958		1.72558
		1.06269	2.78478	0.615111		1.00762
		2.1264	1.58214	2.24917		1.44497
		1.64165	1.83373	1.23708		1.99285
		2.15078	1.93607	1.0632		1.29353
		2.00447	2.08016	0.892928		0.965797
		1.80491	1.56127	1.63365		1.27485
		1.63633	2.08533	0.838291		1.82348
		2.57004	1.47923	1.55663		1.32699
		1.20622	2.25888	0.906157		1.10325
		1.65075	2.24849	0.88213		1.59601
		1.56307	2.82429	1.24085		1.20446
		1.34003	1.70457	1.66158		1.36287
		1.5633	2.31609	1.71141		1.55069
		1.47491	1.21443	1.52981		0.810026
		1.46474	4.35506	1.13146		1.10728
		1.40243	1.47325	2.85322		2.73032
		1.99732	2.0587	1.30452		1.08792
		1.87886	2.09291	1.65591		1.0842
		1.92569	1.65557	1.04937		2.331
		1.2375	2.77629	0.621585		2.01289
		2.04286	2.32589	1.66214		2.03692
		1.48894	1.58221	1.30747		0.903795
		1.3254	1.73703	1.09246		1.95718
		2.0812	3.15206	1.31615		1.3681
		1.08895	1.85924	1.91801		1.5377
		1.29247	1.66401	0.735095		3.39189
		1.54874	2.21594	1.03814		1.51607
		1.45001	1.6178	1.41888		4.35261
		2.09406	1.65247	1.87304		1.06308
		2.02933	1.83969	1.95836		1.27716
		1.58292	2.67812	1.47187		1.71205
		1.19609	2.44767	1.43525		1.44689
		2.14963	1.06898	2.16954		0.627496
		1.19004	2.6965	2.3256		1.89871
		1.40515	1.42821	2.0494		1.55106
		1.1671	1.07025	1.50661		1.52657
		0.61	1.37627	1.64852		2.55737
		1.48484	2.25862	2.26009		1.7086
		2.00908	2.50879	1.41493		1.92712
		1.40506	1.11348	1.39071		1.22144
		1.72142	2.6771	2.12218		1.64728
		0.859513	1.77769	2.10107		0.943542
		1.49998	2.1054	1.57191		0.956906
		1.86974	2.78366	2.03824		2.19717
		1.47939	2.17002	2.62297		2.07157
		1.19003	2.12637	1.53711		0.855334
		2.15281	2.43567	0.9168		1.57242
		1.66322	2.11026	1.69207		0.92736
		1.24845	1.192	1.10296		1.10357
		1.11475	2.71966	2.18791		1.91131
		1.65287	2.82363	1.32855		1.28482
		0.943296	2.4828	0.929233		1.5342
		1.18645	1.99523	1.08904		0.405512
		3.16691	1.21132	1.0974		2.17644
		1.34791	3.06363	2.55297		0.535262
		1.48338	1.35843	1.5273		2.49683
		2.02704	2.27373	1.54355		1.02504
		0.83749	2.43449	1.66836		1.76957
		1.2928	2.05693	0.861553		0.905904
		1.85655	2.26697	2.89725		1.84648
		0.87775	2.02145	2.28414		1.21096
		2.43556	2.24242	1.36423		2.5661
		1.68217	2.55294	1.32268		1.66272
		1.26166	1.45105	0.704473		0.94648
		1.73894	1.25542	1.05104		1.85706
		1.15652	1.10024	1.79836		0.794576
		2.41798	0.828572	0.96771		1.49402
		1.53014	1.80096	1.18461		1.41886
		1.72023	1.10786	2.74209		2.69327
		0.886377	1.85116	1.40951		2.57912
		1.21072	1.71819	2.26494		1.27974
		2.09192	1.06746	1.63331		1.29692
		1.74755	2.11058	0.550452		0.870894
		2.63357	2.23967	1.66108		2.33761
		1.9824	1.22669	2.10299		2.2528
		0.889741	1.15403	2.51916		1.47124
		1.29072	2.24039	1.56163		1.18678
		2.16877	1.27917	2.08738		0.621972
		3.35058	1.05155	1.09594		1.20743
		1.80444	1.72008	1.79592		1.75519
		1.49528	1.4995	1.39404		1.20897
		1.4352	2.31617	1.98607		1.03658
		1.92056	2.16553	1.55165		0.921448
		1.76927	0.901351	1.78244		1.91735
		0.77002	1.39511	1.12566		0.744956
		0.630919	1.52819	1.86397		1.07137
		0.639096	2.84484	1.68254		1.74832
		1.95401	1.35636	1.78097		1.5308
		1.86242	1.68104	1.53253		0.986956
		1.80759	1.68639	0.819401		1.34452
		1.54241	2.37329	1.95623		0.764829
		1.21691	2.42703	2.16572		2.59192
		1.43781	1.91007	2.01603		1.94022
		1.08922	1.9405	2.00629		0.825566
		1.79516	1.57556	2.18047		1.31249
		1.20515	1.4794	0.881243		2.58133
		1.05433	4.61032	1.56397		0.870701
		2.32513	2.29309	2.42009		1.44109
		2.13743	1.82438	1.47917		1.51026
		2.39763	1.60619	1.61673		0.608945
		1.06061	1.26772	2.39992		1.93841
		1.58293	2.06075	2.30655		2.10196
		0.791666	1.95604	1.34242		1.64082
		1.50811	1.55871	3.31353		2.08378
		1.23724	2.1907	1.96717		1.31535
		1.13592	1.82622	1.70002		1.3
		2.06185	1.86954	1.81173		1.58973
		0.359056	1.69187	2.37461		0.99699
		2.12508	2.59169	1.26488		2.53109
		2.29779	1.60382	2.2812		1.29981
		2.10602	1.45799	1.42483		1.20499
		1.8103	1.27638	1.73345		2.0694
		2.50125	1.70888	1.35916		2.14294
		2.31579	2.47537	1.79847		2.17733
		1.57739	2.25004	1.55181		1.5042
		1.86725	2.40492	1.52679		1.34742
		2.52727	1.62698	0.991771		0.913804
		1.17202	1.96608	1.14743		1.18038
		1.78348	2.13932	1.70623		2.62222
		1.44956	2.12057	1.59921		1.73089
		1.42718	2.83924	2.3817		1.30959
		1.66705	2.67924	1.44559		1.37973
		1.48692	2.07774	1.46615		2.40845
		1.20622	2.68863	1.71745		1.21934
		1.50422	1.85608	1.81462		1.54559
		1.58885	1.15041	1.25348		1.14065
		1.58734	1.93401	1.85041		3.38306
		1.89817	2.72024	3.00426		1.52989
		1.83538	2.2073	1.22237		1.35955
		1.48775	1.34047	2.37386		1.18166
		1.95613	2.01472	1.38275		1.03581
		1.0689	1.65439	2.29045		2.08848
		1.36952	2.65204	1.61793		1.41949
		2.29118	1.87662	1.17413		1.66086
		2.00657	1.93936	1.37479		1.41563
		1.50005	2.50831	2.13678		2.0789
		2.38129	1.53985	2.89494		2.06409
		1.81109	3.38649	1.26157		1.23939
		2.22946	1.85788	1.21712		2.13707
		2.96958	0.907477	1.43754		0.990415
		1.37194	1.63411	1.22726		1.82056
		0.909559	2.28639	1.03263		1.88501
		1.98928	2.43146	2.01342		2.04839
		2.25055	0.839026	2.92		2.23545
		2.37682	1.9241	2.02845		2.59658
		1.07708	1.79722	1.7523		1.11881
		1.57317	1.99957	1.36791		1.23687
		1.17825	1.07152	1.73039		1.01096
		1.5506	1.8069	2.76735		1.13945
		2.11075	1.53392	1.25714		1.2282
		1.29129	1.82118	1.86769		1.04787
		1.74308	1.90077	0.919581		2.29602
		1.71304	1.98392	1.38559		1.23777
		1.30609	2.44109	1.97139		0.827276
		1.71623	1.59	2.18505		1.59052
		1.22146	1.54809	1.68275		1.41752
		1.62457	2.72108	1.20331		0.885335
		2.46495	2.08658	0.965358		0.869566
		2.33829	1.85623	2.00072		1.46681
		1.85293	1.64751	1.18167		1.0197
		1.64606	3.00431	1.7009		1.49577
		1.00136	1.71655	2.04718		2.10635
		2.04826	1.75753	1.47206		0.580038
		1.09522	1.46684	1.58213		1.07292
		1.57065	2.57232	2.33508		1.81906
		1.9327	2.66521	3.46904		2.20299
		2.71441	1.86436	1.76376		1.43909
		0.515531	1.87876	2.3802		1.35224
		1.24721	1.97002	1.69694		1.49645
		1.91896	3.18848	1.50065		3.18707
		1.07016	2.76923	1.40604		1.4043
		1.58734	2.03679	2.17745		1.82812
		1.89227	2.92017	1.93917		1.48009
		0.787543	1.77974	2.35153		0.779008
		2.03048	1.75728	2.03602		1.69228
		0.936679	2.16751	1.73895		0.405512
		1.49632	3.02243	1.24852		2.43771
		0.713364	1.06452	1.31995		1.7884
		0.938821	3.11796	0.866683		1.4727
		1.92494	3.13149	1.23249		2.28833
		1.13303	3.45285	1.48325		1.75504
		1.34787	2.44873	2.4286		1.58591
		1.76718	1.17615	3.77815		0.979696
		0.679914	3.47116	1.64278		1.928
		3.03416	2.04316	3.25989		2.32224
		1.12173	3.81163	3.03589		1.46002
		1.60228	3.09377	0.836955		1.65509
		1.93248	1.8909	1.44358		2.3292
		2.10025	2.38395	1.40003		1.6819
		0.855455	1.88714	1.60158		1.28076
		1.65714	2.3113	1.62198		2.27678
		0.910621	1.84308	0.876049		1.1304
		1.49153	3.64823	1.61119		1.30683
		2.42804	2.42255	2.12677		1.27694
		1.12013	1.50352	1.42466		1.32996
		1.12776	2.41811	2.36877		0.766175
		2.68773	2.18385	3.01501		1.32873
		0.964333	1.6542	2.24025		1.64487
		1.80844	1.07221	2.38497		1.72835
		1.63388	2.96943	2.66171		0.497318
		1.11251	3.17534	1.86959		0.993328
		1.04014	1.56649	2.05935		1.11366
		1.34864	2.66471	2.0184		1.28077
		2.11741	2.45838	1.27442		2.25033
		0.696925	0.490064	1.19456		1.35138
		1.65327	2.73593	1.78153		0.359056
		1.69619	2.4697	1.20649		2.05219
		1.40348	2.25773	1.82732		1.66393
		1.50026	1.6241	2.22399		1.6075
		1.61793	3.57876	1.12149		1.88595
		0.914219	2.67363	1.78655		1.27079
		2.50101	3.72642	2.44504		0.608306
		1.5377	1.42909	1.65682		1.57434
		1.57089	2.23097	1.07443		1.36397
		2.0225	1.2384	1.79252		1.58407
		0.993682	2.37206	1.33673		1.41989
		1.60628	2.4448	1.19545		1.3194
		1.61406	3.76103	1.35536		1.26079
		2.26541	2.05373	1.88011		1.54023
		1.18302	2.48286	0.81933		2.32573
		1.54398	1.41628	1.70709		1.04697
		2.41325	2.01225	1.83888		0.787953
		2.07448	2.69453	2.63098		1.83191
		2.47035	2.25051	1.47878		1.58654
		2.06943	4.22289	2.23077		1.09612
		1.94691	2.05438	1.91111		2.1978
		1.52337	2.52314	1.67893		1.26989
		1.0238	1.80345	1.70872		1.90986
		1.73463	1.90767	1.81007		0.529313
		1.58717	1.59793	1.65715		2.28668
		2.66401	1.90968	1.97435		0.451534
		1.55011	2.05454	1.06631		0.93531
		2.30501	2.44296	1.86649		0.930193
		2.20918	2.46972	2.16854		1.9765
		2.2542	3.62062	2.90212		1.8126
		1.3711	1.38372	1.0527		2.73041
		0.815051	2.74093	1.58346		1.13302
		1.92321	1.15848	1.75854		1.86914
		2.1283	1.66354	1.91183		0.847105
		0.937491	1.48414	1.98505		1.32697
		1.46252	2.49029	1.41013		1.4059
		1.6585	3.28048	1.74255		1.64639
		1.11789	1.65173	1.07367		2.25499
		1.66594	1.64087	0.695383		1.18891
		0.957783	0.936256	1.93734		1.7055
		2.11478	2.47632	2.62209		0.941116
		1.73202	2.43193	1.53551		1.26626
		1.87304	2.24505	1.59592		1.02492
		1.58323	1.39211	0.766207		0.730047
		1.35136	1.65925	1.66458		1.16823
		0.964732	2.6393	1.68075		0.664279
		1.22646	2.04682	0.87634		1.99441
		0.932578	2.52716	1.74827		1.10347
		1.13096	2.55722	1.56211		2.29178
		1.52666	1.04926	1.60016		1.17821
		2.23284	1.32745	2.32589		0.886522
		2.03536	1.95094	1.29804		1.34185
		1.56648	2.15077	1.59106		0.490064
		2.52386	1.07929	2.54589		1.61506
		1.50375	1.52596	2.08081		2.17158
		0.815216	2.74876	1.77192		1.74962
		1.36251	2.15721	1.03981		1.23008
		0.946858	1.67515	2.00559		1.14101
		2.06713	0.610738	1.60369		1.17606
		1.68329	1.49687	1.61189		1.09101
		0.827574	1.3853	0.789695		1.70273
		1.28755	1.74248	1.22439		1.15668
		2.11993	2.06599	2.49024		1.82566
		0.997521	1.30002	1.39112		2.27518
		1.442	2.36411	2.12371		0.770635
		2.75757	4.73923	1.40881		1.38757
		1.12016	1.58671	1.59954		1.86901
		2.81336	1.80882	1.3969		1.61608
		1.83565	1.88993	1.22093		1.62486
		1.65754	2.56232	1.10912		1.47502
		1.25072	0.789542	0.821865		1.59389
		0.89723	2.20296	1.24123		0.978226
		1.17071	1.69099	1.51165		0.884953
		0.882571	0.451534	1.60045		1.21265
		2.14301	2.49051	1.1549		1.43128
		1.95522	1.38557	1.92195		2.76357
		0.788186	1.4549	0.935005		0.846276
		1.74644	1.13511	1.31236		1.57649
		1.87173	2.52052	2.12955		1.4899
		1.31985	0.998656	1.40561		1.73442
		1.40857	3.63961	1.20292		2.3853
		1.89765	2.9178	1.98172		1.88848
		1.39411	1.97767	1.61678		1.57396
		1.19526	2.64584	1.62428		2.11201
		2.02517	2.6569	1.289		3.02408
		1.44	2.49473	1.21851		1.36938
		0.920403	0.568396	1.70979		2.78925
		0.84379	1.90701	1.1437		3.44718
		1.2363	1.78016	1.12717		0.814594
		2.57113	2.03095	2.01262		1.64186
		1.89498	1.2821	1.28082		1.21413
		1.11895	1.55823	0.881756		2.62255
		1.96454	2.92605	1.93027		0.618055
		0.763135	1.93282	2.94276		1.26329
		0.4701	2.93451	1.82241		2.03843
		1.64752	0.952179	1.44375		2.28148
		1.21533	0.753548	1.51644		1.79739
		1.03169	1.77523	1.28536		0.964351
		0.804714	2.52691	1.19468		0.935216
		3.1452	1.93575	2.03416		1.8314
		0.882558	1.86786	0.902985		1.61168
		1.44247	2.32879	2.00385		1.12695
		1.09977	1.31634	0.875937		1.43583
		1.25187	1.93986	1.03678		1.2493
		2.3288	2.48706	2.05821		1.32361
		1.48122	2.40028	1.66896		2.11168
		0.967356	0.814276	1.72931		1.85546
		1.36543	2.43494	1.91465		1.11352
		1.15329	1.85601	0.689555		1.34384
		3.02118	2.38715	1.64842		1.59635
		3.15298	1.5648	1.55951		1.36715
		1.77763	2.26582	1.85379		0.696045
		1.39936	1.83606	2.27967		1.83044
		1.37295	1.84602	1.69047		1.92595
		1.05731	2.20742	2.04696		1.0116
		1.72851	2.52128	1.29052		1.92051
		2.75635	2.32522	1.74716		1.21433
		3.01675	1.43305	1.4471		2.59015
		1.82011	3.79986	2.13208		1.66296
		2.34958	2.65998	2.36129		1.5957
		0.977392	2.43545	1.53993		0.62186
		1.10861	2.16875	2.02278		0.608945
		2.00951	2.04384	1.22583		1.98849
		1.95293	1.33921	0.850333		1.6798
		1.38109	1.72444	1.36648		1.73497
		1.38448	1.46815	1.35337		0.996517
		1.75876	1.83454	1.58673		1.64652
		1.96726	1.9487	1.23212		0.78466
		1.21581	1.96889	1.37397		1.56783
		1.93556	1.82912	1.27433		1.2871
		1.09787	1.65312	1.71029		1.98628
		0.882854	3.11122	1.00513		2.80243
		0.738361	1.74442	1.14579		1.76368
		1.62539	2.71551	2.00545		1.64954
		2.32382	0.992666	1.47616		2.0313
		1.00833	2.15932	2.04895		1.99397
		1.16973	2.10587	0.953675		1.20353
		0.522311	1.46282	1.60213		1.01858
		1.04011	1.77934	1.69761		2.13866
		1.01601	2.55455	2.39014		2.42162
		2.01536	2.94923	1.42328		3.32884
		1.779	2.06501	1.45065		1.30091
		2.18247	1.56309	1.35729		2.85333
		1.37078	1.69086	2.17069		1.30517
		1.44344	3.10141	1.84998		0.799491
		1.34598	1.77275	0.890818		0.882462
		0.841371	3.13242	1.92787		1.19443
		1.09878	3.4312	1.87721		1.58631
		0.690232	1.59695	1.59784		1.80203
		0.710039	3.6696	1.4507		1.56959
		0.529313	2.24195	1.68881		2.51278
		1.03579	1.93659	2.79162		1.15423
		1.5187	0.738361	1.68171		1.18744
		1.17388	1.96316	1.25725		0.938673
		0.983895	2.04787	1.32255		0.962494
		0.853129	1.47284	2.27054		1.76614
		0.949524	1.43228	1.85229		0.633399
		0.657482	1.31368	1.90259		0.993263
		1.10185	1.14589	1.76981		2.42008
		1.05225	2.15877	1.95971		1.32448
		0.873615	2.43359	1.27484		1.79414
		0.978914	1.68382	2.64579		0.644181
		0.864196	1.78781	1.12798		2.00461
		1.0596	1.78828	1.94568		2.642
		0.803541	1.63133	1.84524		3.77833
		1.03742	1.56841	1.3		2.25391
		1.13959	2.31375	2.24304		1.9174
		0.664546	1.38664	2.23285		2.44608
		0.595236	1.52081	1.50369		0.864041
		1.18468	2.59628	1.63663		0.963654
		0.703601	1.8499	1.49724		2.11553
		0.730527	2.37171	1.33184		1.85385
		0.818206	2.07439	2.0328		1.24921
		0.935785	1.77683	1.84128		1.29333
		0.934203	1.97111	0.628863		2.20755
		0.843613	1.0484	2.14187		3.09198
		1.32035	2.17293	1.87247		2.62155
		0.685789	1.46235	1.61705		1.00789
		0.892455	2.45038	2.00549		1.74183
		0.936451	1.86953	1.4705		2.61927
		0.839266	2.45795	1.50336		1.57893
		1.46012	1.97863	1.55015		1.19443
		1.42817	2.86208	2.64672		1.68474
		1.12615	3.25761	1.92221		2.39753
		0.705252	1.56152	1.1538		1.46969
		0.681059	1.98679	1.68928		1.26141
		0.903165	2.21582	2.33542		1.67421
		0.689394	2.68391	2.24447		1.60072
		0.715375	2.28089	1.31932		1.73901
		1.55214	2.37798	2.08676		0.87642
		1.08657	2.88968	1.4388		1.67844
		1.04349	2.37545	1.46126		1.88274
		0.858327	2.98262	1.04321		3.80611
		0.856062	2.60828	1.71153		1.09048
		1.05581	1.59432	1.18584		1.71219
		0.857358	2.611	2.03301		2.55485
		0.489271	2.47383	2.06107		1.24506
		0.858221	0.944837	1.10171		3.51248
		0.649907	1.32563	1.82632		2.2206
		0.742728	2.00704	1.56632		1.31702
		0.868849	1.30481	2.35583		1.02611
		0.729564	2.00808	1.60679		1.82757
		0.710939	2.53813	1.60233		1.39998
		0.756776	2.30358	1.21585		0.976629
		0.885346	1.28279	2.34116		1.76875
		1.0178	1.42109	1.72042		1.75565
		0.727357	2.47963	2.1925		3.54185
		1.18795	3.65292	2.08095		1.05139
		1.17573	1.22789	2.35791		1.53253
		1.53783	1.79443	2.27831		2.06174
		0.750392	1.19706	2.45027		3.37366
		0.514169	2.07689	0.971044		3.00113
		0.682163	1.98809	1.9339		1.41257
		0.556088	1.48526	1.79916		2.56727
		1.31003	2.53082	2.41454		1.77195
		1.20137	2.65604	2.39567		0.766207
		0.925304	1.52037	2.24824		0.834839
		1.00122	2.33424	1.26154		1.892
		0.661344	2.60207	1.54568		1.48405
		1.28706	3.89456	1.38314		1.46189
		0.993328	2.1508	2.90822		1.52023
		0.747667	3.30647	0.935361		1.62187
		1.19564	1.30645	1.65543		1.19983
		0.739448	2.51592	0.54899		2.53957
		0.718176	1.55587	1.36107		1.27983
		0.935543	1.86288	1.91887		0.847264
		1.3045	2.11328	2.12671		1.86007
		1.02065	1.20371	1.21365		2.78101
		0.789181	3.15875	1.10688		1.31717
		0.833574	2.29647	1.21941		1.23807
		0.664546	1.81093	1.64214		1.11866
		0.71724	2.11339	2.30983		1.46616
		0.899297	1.9799	2.35978		1.57729
		1.14339	1.36907	1.18722		2.487
		0.588366	3.57765	2.10693		2.7893
		0.868186	2.40257	1.52382		2.30276
		0.580186	1.44745	1.91637		1.41158
		0.750172	1.0151	2.12164		1.72812
		1.02586	2.04273	1.88136		2.00872
		0.834176	2.7787	0.980654		2.41438
		1.06167	1.49198	1.54529		1.6227
		1.14177	1.44131	1.69473		1.67866
		0.936816	3.40133	0.833919		1.55078
		0.672225	2.3362	1.82146		3.21487
		0.996647	1.41156	1.50956		2.73928
		0.648888	3.3617	1.48905		2.30471
		0.847487	2.32169	2.1848		0.405512
		0.638676	1.61279	2.0274		0.969896
		1.09848	2.03402	1.36133		1.77127
		0.681059	0.928758	2.10808		2.41476
		0.750392	2.77299	1.93651		1.25811
		0.629592	2.25458	2.11066		1.67755
		0.61964	2.03648	1.51529		1.52477
		1.03115	1.90065	1.88591		1.24235
		1.20826	1.42343	1.47011		2.18995
		0.697964	1.90547	2.42293		1.398
		0.682025	1.48395	2.18668		1.64638
		0.941746	2.6756	2.48818		2.12297
		0.987476	1.58513	1.97372		2.84084
		0.789828	2.89777	1.42685		1.11831
		1.05174	2.68411	1.55064		0.359056
		1.52276	1.56421	1.16686		2.3447
		0.947317	3.37134	1.64623		1.18296
		1.81783	2.08634	1.86736		1.40583
		0.828058	1.51644	0.854439		1.22873
		0.950952	1.99657	1.95409		1.0136
		1.43979	1.78632	1.409		1.74094
		0.405512	1.28662	2.13383		2.56014
		1.09354	2.88835	2.331		1.58142
		1.42804	0.562101	1.96503		2.40343
		1.36113	1.71002	1.29894		1.02965
		0.709651	2.47931	2.64009		2.38852
		0.96013	1.77668	0.960772		2.01058
		0.540452	1.36535	2.17458		2.02315
		1.09113	2.05179	2.7447		1.43075
		1.61643	1.76341	1.07424		1.09106
		0.830584	3.00474	0.983888		1.3329
		1.25612	1.58511	1.2431		1.9141
		0.669149	2.20737	2.65764		2.78828
		0.980676	2.62254	2.08577		2.58313
		0.681059	2.00799	1.58092		0.828572
		1.46726	1.42149	1.26511		0.921221
		1.22903	1.31945	1.75579		1.32907
		0.841866	1.95314	1.6765		1.29811
		1.22196	1.29936	1.87684		1.26599
		0.897284	2.4806	1.79127		1.34941
		1.27757	1.80099	1.82029		2.54683
		1.28676	1.45925	2.84295		1.15728
		0.940224	1.50333	1.68411		2.12453
		1.1885	2.10965	1.50637		2.40938
		1.06121	1.35175	1.97155		2.29253
		1.09354	2.51077	2.47814		1.07035
		0.815404	0.581414	1.20148		1.65325
		1.30566	1.7554	1.72684		1.70412
		0.947547	0.99527	1.51606		1.35899
		0.871933	2.06828	2.16261		0.807204
		2.0894	2.16857	1.47901		2.45098
		1.55734	1.56512	1.64968		1.79505
		0.747587	2.48295	2.8503		1.83053
		1.5532	2.2748	2.06402		2.91642
		2.1614	2.35718	2.91053		2.21967
		1.31659	2.7898	1.1347		1.69233
		1.60976	1.96009	1.79266		1.66622
		1.1375	2.55414	1.53189		1.56038
		0.64281	1.0755	1.14377		1.18549
		1.64791	1.80102	1.07052		2.97168
		1.61729	1.98566	2.2896		2.19464
		1.05159	2.08079	1.27737		1.19559
		0.940362	2.87193	1.57578		1.32851
		1.71017	1.93205	1.62628		1.21056
		0.942227	2.95457	1.13144		0.529313
		1.32388	1.56031	1.31073		1.83928
		1.18548	2.54437	1.77521		1.5582
		1.21774	2.37475	2.51679		2.61971
		0.912497	1.38382	0.733039		1.87786
		2.70127	2.51114	0.522311		1.34866
		1.68188	3.38073	2.23185		0.968762
		1.13229	3.37352	0.925724		1.16352
		1.58092	1.29417	2.9037		1.29254
		0.666814	2.4481	1.69342		1.4751
		1.36555	1.97906	2.59466		1.23375
		0.756915	2.35617	1.16492		1.65671
		1.08942	4.01453	2.5622		2.00651
		1.29817	2.06996	2.09244		1.12041
		1.00737	1.94012	1.64217		1.39467
		1.32882	2.96535	1.21892		1.1955
		1.001	2.08533	1.61286		1.71543
		0.814311	0.590301	1.12335		0.853209
		0.676365	1.92227	2.90614		0.405512
		1.20349	2.03599	2.14057		2.30916
		1.00854	3.04983	2.93551		1.15332
		0.691105	1.37634	1.28375		3.20404
		1.45415	2.74676	1.46195		1.31127
		0.59102	1.94601	0.63366		1.44962
		1.72339	0.881825	2.07052		1.24605
		0.568514	1.84993	2.27651		0.98729
		0.854395	1.57388	0.930013		2.16435
		0.872858	0.904111	2.46682		0.968186
		2.0225	2.17805	1.67486		1.28869
		0.720008	1.78577	2.41786		3.17284
		0.529313	1.97842	1.32879		0.785632
		1.25205	2.70456	1.40633		1.08989
		0.863085	3.04686	2.22888		1.15688
		1.85522	2.63166	0.954745		1.48203
		0.84802	2.00534	1.71319		0.809075
		1.06549	2.53061	1.31591		2.363
		1.63227	2.22685	1.12647		1.09519
		1.18296	1.68833	1.09041		2.87404
		0.786382	1.11359	1.31688		1.61453
		0.543323	1.82929	1.81212		2.71114
		0.758228	2.52238	1.29185		2.11556
		1.10764	3.63299	1.56114		2.57422
		0.683661	2.69513	1.26936		1.80582
		0.902949	1.91222	1.17149		1.46317
		1.24074	1.75456	1.27329		2.58664
		1.4456	1.26043	2.07501		1.12858
		0.752773	1.04474	1.08281		0.565221
		0.891818	2.03135	0.780148		1.82084
		1.24725	1.69054	2.39405		3.55097
		0.359056	2.76709	1.88242		0.652196
		1.22658	3.60116	1.21296		0.890855
		1.52379	3.72972	2.93484		2.01697
		0.815919	2.34817	2.59093		1.41245
		0.844757	1.08494	1.77522		1.56216
		0.880031	2.41809	1.59027		0.996286
		1.01457	2.33597	1.43594		1.30483
		0.746683	1.26219	1.68098		1.76859
		1.1081	2.91923	0.839928		1.32492
		0.740875	1.1727	1.81125		1.43032
		0.963073	1.85001	2.5759		2.15833
		1.06873	2.92186	2.24432		0.850338
		0.916114	3.10131	2.54911		3.33145
		0.930086	1.20553	2.1455		0.790491
		0.687538	1.93979	1.35975		1.1195
		0.821873	3.08315	1.48673		2.18522
		0.762118	1.12336	1.30908		1.29467
		1.01096	2.05529	1.79137		1.21527
		1.22603	3.25161	1.66686		1.70787
		0.75372	2.41236	0.917437		0.788978
		1.0608	0.849816	2.99268		1.13419
		1.05824	2.27806	1.52755		2.09492
		0.924688	2.19197	2.92601		1.44154
		1.14425	1.56832	1.50271		2.42299
		0.837122	1.89222	1.66441		1.56348
		0.661344	2.41555	1.6034		0.962365
		0.73994	3.09875	2.23621		1.01227
		1.23383	2.04358	1.57187		1.03228
		0.727357	1.43327	1.55544		2.22099
		0.654231	0.694878	1.2003		1.19073
		0.82426	0.939023	1.44408		1.59146
		0.899883	1.72582	1.72145		1.35978
		0.787552	1.91032	2.06005		1.41775
		1.47097	1.91553	0.723491		2.13203
		1.06736	1.37596	1.72273		1.25998
		1.03682	1.11422	1.15346		2.57213
		1.24542	2.51612	2.40751		1.38536
		1.52926	0.875404	0.610738		1.47972
		1.18087	2.59512	1.66327		2.17573
		0.773416	1.18029	1.9921		2.23578
		1.43714	2.25244	1.50171		1.15076
		1.45581	1.33651	0.988245		0.997996
		0.405512	1.44796	1.93575		1.33858
		1.26546	1.35628	1.81652		1.04517
		0.682185	2.53424	1.13005		1.78895
		1.08695	2.94571	1.3406		1.30944
		0.793233	2.1564	1.87861		0.881447
		0.760561	2.3791	1.26425		1.25395
		0.732912	1.70392	2.17809		1.21084
		1.00322	0.815246	1.97243		2.01692
		0.623327	1.4606	1.39829		2.29789
		1.33136	1.0737	1.49814		0.917387
		0.791787	0.69368	2.06892		1.22233
		0.679749	0.707502	2.02812		0.847929
		1.01455	0.443609	2.27888		0.87892
		0.666615	1.31543	1.72102		1.21232
		1.00084	2.62427	2.15159		1.32856
		1.03405	1.98806	1.14641		2.05644
		0.745984	1.18343	1.7902		2.74112
		1.88298	1.4233	1.92772		1.47451
		0.476971	1.31925	2.45092		1.79086
		1.43272	1.42918	1.94614		0.937132
		1.34674	1.50027	0.974734		0.909271
		1.14182	2.17493	1.34031		0.99433
		1.03424	1.18244	1.64019		1.02489
		1.8224	1.33855	2.04046		2.86791
		0.957698	3.14509	0.819064		1.8937
		1.19392	1.08939	2.20883		0.92856
		1.84948	1.54211	0.963831		2.04291
		1.01261	1.83329	1.65844		1.03389
		1.14579	1.53796	1.88869		1.3759
		0.93458	2.01408	1.31773		1.05453
		1.27205	0.830025	1.58954		2.52266
		1.51349	2.25152	1.57799		1.37354
		0.91059	1.92098	1.12766		1.44542
		0.902985	1.73274	1.29728		1.33223
		1.4539	1.17696	1.71374		1.19062
		0.773242	1.97038	1.94004		1.32744
		0.581414	1.64621	1.51179		1.12153
		0.668407	1.31091	1.04469		2.84117
		0.971379	1.65711	1.65075		1.19114
		1.33856	2.44448	1.0086		1.23563
		1.61294	2.96339	1.21888		2.2321
		0.819535	1.22373	1.4869		3.19398
		1.2824	2.72576	1.20362		1.9444
		1.27086	1.53235	1.31111		2.50517
		0.786777	1.64426	0.865713		0.839928
		1.17556	1.0706	1.55039		0.853639
		0.784047	1.35431	2.01267		1.21809
		1.11613	1.83889	3.32226		1.41041
		0.554457	0.805126	1.12262		2.77733
		0.794437	1.78983	0.828816		1.18152
		1.37925	1.86966	2.37833		2.26561
		1.24406	1.82149	2.26663		1.84168
		1.26377	1.62322	1.6295		1.64385
		1.84139	1.71091	1.62611		0.815414
		1.22453	1.17463	0.80241		2.47753
		0.502535	1.5523	1.27243		1.77236
		1.33189	2.08985	1.42009		2.0066
		0.501331	2.0918	1.4847		1.51986
		0.4701	1.52344	1.39378		1.25511
		0.851241	2.29956	1.47873		2.93445
		1.39555	2.37242	1.69925		1.82047
		1.41967	2.13017	1.9092		0.888345
		1.41962	1.75287	2.19095		2.58688
		0.604408	2.2354	1.85103		2.54134
		1.56997	2.06914	1.93788		4.25394
		1.27833	1.69007	1.66007		1.32278
		1.67136	1.38968	2.02493		1.41426
		1.09439	3.06757	1.88844		1.88748
		1.25088	1.5796	1.4919		1.59421
		1.09519	1.53651	1.58745		1.58478
		1.27174	1.09376	1.01197		0.83625
		0.856935	1.80378	1.73603		1.03973
		0.973599	2.94353	1.39641		1.37312
		0.662007	1.51395	1.76611		1.95279
		1.52775	1.5158	2.59067		2.20146
		1.2579	1.35656	0.661344		0.995396
		1.6864	2.23997	1.98916		1.84719
		0.748876	0.682185	2.05882		1.00518
		0.78293	1.4738	1.85512		0.699096
		0.973952	1.87252	1.87812		1.10775
		0.708649	1.95041	1.45315		1.70768
		1.09509	1.99087	2.16503		1.42227
		1.16699	0.991484	2.24366		1.17475
		1.23965	1.35022	2.21		1.22889
		0.984616	2.23752	2.59315		0.756776
		1.41619	3.04733	2.68592		1.26842
		1.67051	1.66197	2.43073		1.28049
		0.927946	1.47314	1.70278		0.723909
		0.76237	1.63558	1.88384		2.20164
		0.97334	1.40846	0.899207		1.92968
		1.74775	1.80191	1.65884		2.12116
		1.43642	1.71332	1.80799		1.39226
		0.883825	0.864708	1.60726		1.18541
		1.84449	1.35292	1.58111		1.00339
		1.89484	0.834068	1.85511		1.72521
		0.884932	1.18471	1.54783		0.998676
		1.28266	0.890435	1.30067		1.62539
		0.78466	0.938931	1.60598		1.95802
		0.812419	1.66692	1.73169		0.983669
		1.28769	1.84678	1.35749		1.53757
		2.05217	1.44654	2.26763		1.54642
		1.68099	1.34809	2.52678		1.15161
		0.556088	1.14813	1.80824		0.877846
		0.405512	1.82886	0.980973		1.42059
		0.903237	1.10915	0.359056		2.9851
		1.26552	1.95818	1.75239		1.25657
		0.86936	2.58926	1.50768		0.980118
		0.956382	1.02904	1.26415		2.4331
		1.10299	1.20215	2.15638		1.6068
		0.819929	1.27879	0.971075		1.77505
		1.00107	1.84882	1.18938		0.998639
		1.32235	1.70281	1.7832		1.81299
		0.917493	0.916336	2.05316		1.41942
		1.7314	0.881782	1.74613		2.45297
		0.722122	1.42607	1.81491		1.13859
		0.543323	1.71965	2.82233		1.38523
		1.03924	1.4164	1.82392		1.38606
		1.13091	1.00963	1.90559		1.08687
		1.40794	1.608	2.95498		1.63509
		0.820766	1.07712	1.74084		0.822733
		1.03045	1.58583	1.49027		1.08412
		0.623303	0.871594	1.37671		2.19807
		0.62186	1.17653	1.85537		1.67471
		0.568396	1.30236	1.50805		0.912842
		0.935066	1.47085	2.1679		1.2694
		1.24412	0.991257	1.27073		1.47254
		1.01719	1.74978	1.77711		1.10406
[truncated: 3,724 more rows]

## Sheet: Fig. sup. 3C
10 minute cell volume - phase 1
	Control	PA(11)	VAN(20)	PA + VAN(10)	PA + VAN(20)
	1.86346	0.837951	0.654904	1.20129	1.73193
	1.68194	0.696482	1.24223	1.13644	0.964695
	1.19887	1.37361	0.964732	0.935629	1.17015
	1.27277	1.60153	0.68334	1.43348	1.164
	1.81529	1.16947	1.54235	0.748126	0.968657
	1.21501	1.05221	1.20622	1.61416	0.723897
	1.61791	0.861888	1.53502	0.748887	0.635322
	0.861006	1.15418	0.715303	1.44611	0.697894
	0.895986	1.01951	1.31181	1.30525	1.0638
	1.88292	0.938849	1.11382	1.39473	1.00168
	1.96089	0.826938	1.80425	0.874066	0.560411
	1.11831	1.02724	1.3203	1.43643	0.99853
	1.29862	1.3768	3.75686	0.974192	0.961011
	1.15748	0.877254	1.53835	0.75137	0.730011
	0.727838	0.733039	1.9226	1.29153	1.25316
	1.39733	0.987542	1.11791	0.789542	1.04587
	1.88121	1.33713	1.49445	0.89915	0.689904
	1.03385	1.13672	2.15278	1.00581	1.07142
	1.58753	0.405512	1.29375	0.607991	1.47006
	0.865498	1.69417	1.5306	0.589633	0.853194
	1.69264	1.25277	1.39684	1.55936	0.826593
	1.3385	0.550452	2.37291	0.663463	1.32505
	2.34218	0.919319	1.5093	0.826867	1.47383
	0.885048	0.78072	2.10625	0.8648	0.924939
	0.764093	1.31275	1.56039	0.954225	0.896473
	1.35031	0.927884	1.39572	0.791498	0.986846
	1.86002	1.00846	1.07335	0.769573	1.23725
	0.798746	0.748179	0.659112	1.25388	1.81548
	1.3507	0.747838	1.14579	0.795195	0.837803
	0.87771	0.976538	1.03566	0.670818	0.828816
	1.45747	1.03883	1.96572	1.34524	2.16646
	1.54374	1.22011	1.07321	0.949888	1.28306
	1.75938	1.40739	1.40362	1.14695	0.80124
	0.913669	0.815216	1.82933	1.78329	0.535262
	1.85707	0.780148	0.659966	1.24703	0.956051
	2.39542	1.25042	1.37562	0.840203	0.97255
	1.69746	0.490064	1.04336	0.763135	1.59016
	1.17615	0.946138	1.48248	1.19992	0.800511
	0.748876	1.48711	1.35576	1.0936	0.912689
	1.77781	1.51457	2.14797	1.10538	1.05313
	0.869093	1.20788	1.46569	0.724662	0.870979
	0.748876	0.443609	1.4184	0.639096	1.11103
	1.32574	0.517811	1.74807	0.821962	1.49053
	1.85605	0.98339	1.49524	1.36493	0.825566
	1.68479	1.77871	1.73404	1.45197	0.556494
	1.62199	1.54211	2.63419	1.18173	1.62997
	2.25026	1.37029	2.27381	0.527271	1.51558
	1.20391	0.982775	2.12667	1.11556	1.28131
	1.68696	0.948977	1.35897	0.791719	1.65676
	2.22246	0.769174	1.43781	0.707481	1.28581
	2.10229	1.24994	1.49911	0.941536	1.60895
	1.18332	1.38786	1.37884	0.562535	0.949029
	0.71951	0.554104	1.34923	0.98606	0.946318
	1.45701	0.620015	1.10397	0.784787	0.75139
	0.884535	1.35938	0.556494	0.62944	0.879782
	1.63388	1.31771	0.937655	0.759053	0.689362
	1.22513	0.765092	1.69598	1.09069	1.09054
	2.21735	1.20477	1.59251	0.829401	1.34478
	1.06557	1.49663	2.87236	1.56386	1.8403
	1.41988	0.718526	1.07289	1.19826	0.98872
	0.803967	0.96061	1.39098	1.80891	0.892251
	1.83417	0.714629	1.22362	1.48645	1.17762
	1.2732	2.04995	1.40638	0.85847	0.817448
	1.80491	1.00034	1.31255	0.681059	1.25144
	2.17496	0.742728	1.72983	1.08229	1.23838
	1.36467	1.15768	1.35044	0.881447	0.703785
	2.98217	1.4772	1.79982	1.22288	0.530986
	1.56841	0.890585	1.22842	0.938244	1.0649
	1.58071	1.16795	1.08882	1.04307	0.916799
	1.27738	1.10496	1.06154	0.779653	0.847105
	1.18285	1.01945	1.02472	1.83052	0.865262
	1.75928	0.359056	1.37909	0.640453	0.851109
	1.21439	1.48324	1.0532	1.43602	0.875016
	2.10801	1.08429	1.75799	0.818608	0.585598
	1.17735	1.32431	0.451534	0.829345	1.34138
	1.23995	0.987762	1.06062	0.954414	1.01485
	0.959292	1.32249	1.35513	1.4302	0.451534
	1.23174	1.47628	1.31797	1.2319	0.933176
	1.81436	0.847355	0.76237	0.554458	0.830405
	1.30221	1.2524	1.29899	0.559207	1.00443
	1.77238	1.33446	1.80481	1.39312	1.59998
	1.48419	1.1848	1.17706	1.06549	0.903672
	1.70002	1.47185	1.22719	1.36823	1.01892
	1.1687	0.881023	1.78093	1.18467	1.06624
	2.18943	1.0045	1.46532	0.716897	0.451534
	1.23739	1.53327	1.69934	1.14983	1.1338
	1.71672	1.12713	1.36182	1.17259	1.00298
	1.57019	1.15794	1.77168	0.405512	1.00025
	1.30808	1.14719	1.56033	1.11323	1.23804
	1.52625	0.540452	0.949431	0.767819	1.14499
	1.43209	0.914363	2.06212	1.11395	1.29629
	1.23636	0.843357	1.43977	1.08834	1.22284
	1.2354	0.898807	0.703428	0.501938	0.654579
	1.65072	1.23119	1.64764	1.12557	0.644394
	1.4216	0.588366	1.69346	0.653155	0.881243
	0.859463	1.10442	1.55734	1.57401	0.677366
	1.25791	1.25335	1.30303	0.584171	0.809132
	1.25012	1.53391	0.987571	1.23106	0.862216
	1.23791	0.965282	1.09138	0.663824	1.27625
	1.98706	1.36215	1.12092	0.713924	0.562101
	1.30077	1.70058	0.852162	0.727271	0.974468
	1.29891	1.59557	0.732687	0.793655	1.07533
	1.41529	1.28604	0.959607	1.42165	0.930882
	1.2171	0.816035	2.10923	1.3489	0.947255
	1.32271	1.54439	1.32249	1.01816	1.03984
	1.07082	1.60287	1.03316	0.835966	0.668219
	1.0398	1.09708	1.46469	0.775277	0.781192
	1.47643	2.80173	1.22836	0.86351	0.695361
	1.3771	1.40787	1.21659	0.772725	0.756411
	1.15168	0.979787	0.889144	1.23212	0.78466
	1.64211	0.621294	0.957917	1.30758	1.01441
	2.21492	0.593064	2.32903	0.463193	1.26123
	1.64715	1.24737	1.19357	1.38869	1.26523
	1.62087	0.697754	1.53542	0.359056	1.59801
	1.30958	0.837266	1.59894	1.0095	0.582347
	2.35643	1.527	1.41382	1.03229	1.89146
	1.98365	1.24099	1.77021	0.911216	1.14424
	1.05838	0.969052	1.42435	0.800511	0.789054
	1.03628	1.08715	1.04502	0.822866	0.799711
	1.68927	1.12761	1.36073	1.06282	0.946143
	1.78319	1.02278	1.71978	1.01461	1.19552
	1.23098	0.743132	1.48887	1.24277	1.10577
	1.55858	1.00721	1.22453	0.913599	0.690021
	1.46853	1.51815	1.61352	1.31816	0.92817
	1.41175	1.10174	1.33497	1.47052	1.59973
	1.08927	0.925596	1.54792	1.01603	0.867793
	0.967161	0.853145	1.90781	1.17917	0.614288
	1.81277	1.09917	1.39068	1.03888	0.85087
	1.74653	1.41488	0.979403	0.764449	1.06839
	0.826246	1.05918	1.63914	1.41718	1.04832
	1.26883	2.04114	1.58008	1.28882	0.986242
	1.0562	0.405512	1.72496	1.44054	1.27309
	0.988379	0.787403	1.03394	1.00193	0.771777
	0.713344	0.845925	1.90319	0.527271	0.922403
	1.20325	0.982194	0.774509	0.829775	0.802629
	1.1687	1.45855	0.87866	0.862912	1.15118
	0.87937	1.73282	0.970573	0.608945	1.09387
	1.33983	1.37041	1.34259	0.75836	0.930842
	1.31109	0.832517	2.07773	0.632765	0.659351
	1.0685	0.961026	1.64077	0.501938	0.91735
	2.0374	0.74574	1.68826	0.835707	0.722924
	1.79006	0.735274	1.5191	0.89276	0.826931
	3.22662	1.22614	1.31146	0.536713	0.850333
	2.31693	1.74932	2.1107	0.556088	1.0143
	2.18868	0.962011	1.44059	0.710039	0.935149
	1.75242	1.26782	1.2109	1.08352	0.728909
	2.04756	1.30321	1.67901	0.664907	0.451534
	1.70151	2.04669	1.91629	1.10407	0.703601
	0.877593	1.50188	1.4188	0.892251	1.31985
	1.77016	1.76509	1.07695	0.799294	0.669675
	0.875894	1.1425	1.52499	0.776242	1.49713
	2.56074	1.3476	1.66678	0.814311	0.95091
	1.68359	1.62905	1.66832	0.581414	0.824263
	1.79169	0.587617	1.39842	1.13144	0.497318
	0.580038	1.32146	1.3093	1.36092	0.802888
	1.65563	1.11522	1.26923	1.42292	1.37385
	1.02312	1.16291	1.12404	0.405512	1.08546
	1.71446	0.757724	2.32806	0.690502	1.03991
	1.78694	1.26358	0.911027	1.13763	1.1525
	1.12941	1.41869	1.73727	1.62065	1.37691
	0.85273	2.6641	1.89827	0.922729	0.843899
	0.662537	0.888734	1.59396	0.777041	1.05876
	0.819863	1.16836	1.89131	1.11895	0.750189
	2.04359	1.27161	1.94764	1.12335	1.26013
	1.37037	0.693604	1.12343	1.04887	0.806112
	0.96394	1.30877	1.62011	0.405512	0.933243
	2.18647	1.0419	0.796667	0.593064	1.37982
	1.40245	1.17454	1.73402	0.843641	0.973924
	1.3477	1.01568	1.22717	0.937239	1.4309
	1.4386	1.13557	1.35163	1.09715	1.41033
	1.9553	0.987623	1.0126	1.12888	0.405512
	2.05422	2.52606	1.43603	0.894904	0.857513
	0.959508	0.891031	0.668407	1.06277	0.911523
	1.24936	1.00957	0.825703	1.01746	0.916704
	1.64208	1.259	0.405512	0.6832	0.823003
	1.22311	1.0683	1.55167	0.923462	1.2602
	1.81741	0.857698	1.15421	1.52336	1.19948
	1.03636	0.660168	1.14331	0.632765	0.973692
	1.86366	0.885346	1.5797	1.02658	1.48833
	1.62218	0.860798	1.72362	1.03472	1.24954
	1.07343	1.01749	1.72039	1.1739	1.06549
	1.59084	0.588612	0.73995	1.10515	1.07889
	2.36561	1.46385	0.803412	1.20718	1.10698
	0.798746	0.863859	0.689555	1.77561	1.39816
	1.04832	0.851376	1.54164	1.0744	0.989512
	1.00564	1.58983	1.57696	1.45884	0.675948
	1.15303	2.07766	1.20233	1.65824	1.20717
	1.308	1.74903	2.77741	1.20098	0.896126
	1.90137	1.22169	1.83418	1.2495	0.743875
	1.64728	1.20823	2.34338	0.829401	1.10842
	1.08576	1.16597	1.83124	0.73995	0.782525
	1.17582	0.451534	1.65072	0.833982	0.970006
	1.2263	0.576224	2.38734	0.966058	1.0201
	1.43274	0.556088	1.17749	1.0812	1.71031
	1.12169	1.1347	1.42937	0.757573	1.68363
	1.3862	0.801399	1.79475	0.772675	1.00916
	0.68858	0.62186	1.08788	1.221	1.26666
	1.46549	0.879695	1.43915	0.895532	1.83032
	1.35016	0.839002	1.77452	0.501938	0.865172
	1.48816	0.587617	1.18382	1.18599	1.36885
	1.18323	1.08899	1.67141	0.501938	0.633399
	1.16812	1.15674	2.01907	0.526617	1.08379
	0.582347	0.556432	1.37637	0.804714	1.63499
	1.45738	0.359056	1.05126	0.871883	0.815123
	1.17962	0.942706	1.56553	0.830207	1.85057
	1.28062	0.892251	1.11266	0.752371	0.771514
	0.890114	0.812952	1.63295	1.12766	1.09197
	1.51918	1.12741	0.966137	0.754157	1.24504
	1.25188	1.0365	2.14815	1.47861	1.15341
	0.979038	1.07852	1.92906	1.17098	1.02285
	1.58949	0.451534	1.18939	0.608945	0.458476
	1.47943	0.789663	1.87825	0.853398	1.48724
	1.29971	1.85557	1.33576	0.489271	1.50568
	1.23751	1.85648	1.71736	1.27686	0.840512
	2.01574	0.831753	1.36091	0.796499	0.540452
	1.01334	0.979812	1.74683	1.14112	0.869093
	1.76847	0.529313	1.4705	0.622337	0.645614
	1.72684	1.10861	1.74157	0.758441	0.90658
	1.56848	1.66777	1.41348	1.50126	0.668407
	1.47115	1.15982	0.769582	1.13794	1.21045
	1.11981	1.01632	1.44693	1.34042	0.881668
	1.73793	1.06979	2.26751	1.0074	0.78721
	0.827867	0.717914	1.57666	1.1216	1.09188
	1.58491	0.925058	0.866076	0.847105	0.876482
	1.11278	0.973858	0.946179	0.963831	0.956358
	2.45109	0.802013	2.48788	1.50666	0.657356
	2.16585	0.803461	2.10639	0.648403	0.84211
	1.49522	0.752277	1.65877	1.16454	1.17656
	1.71736	1.08281	1.28678	0.794576	0.71575
	1.70505	0.645614	1.3242	1.25121	2.69612
	2.50878	1.59459	1.4958	0.664547	1.05313
	0.715394	0.833647	1.76715	0.566287	1.27593
	1.21569	1.02809	1.40035	1.51909	1.16206
	1.80456	1.29879	0.83249	0.764926	0.918484
	2.87628	1.12961	1.29678	0.520027	0.809075
	1.24086	1.1662	1.1848	0.600547	0.64643
	2.07113	1.18179	1.63146	0.501938	0.528951
	1.15282	1.38174	1.22565	0.872136	1.11829
	1.45654	0.932013	1.79428	1.15284	0.708649
	1.46257	1.77158	0.827982	0.96325	0.853886
	1.15973	0.716274	0.501938	0.856136	1.06797
	1.25215	1.03757	1.26585	0.853058	1.21597
	1.18978	1.01774	1.1482	0.864399	0.856062
	0.918909	1.52523	2.22701	1.52877	1.2447
	1.15491	0.973599	1.02942	0.910896	0.766773
	1.51698	1.05607	1.73504	1.21437	1.00031
	1.55169	1.50358	1.79459	0.8049	0.883593
	0.693782	1.10407	1.2649	1.37284	1.13718
	0.902456	1.00567	1.57026	1.49756	0.746683
	1.42702	0.846791	0.740792	0.71724	0.956225
	1.24887	1.74927	1.59025	0.4701	0.958614
	1.81869	1.07157	2.34609	0.742348	0.562535
	1.49366	0.876817	0.671938	0.980849	1.132
	1.7065	0.621991	0.918553	1.19192	0.718637
	1.24609	1.42288	0.972085	1.45575	0.986665
	1.43723	0.359056	1.36275	1.33558	0.965905
	2.06846	1.05373	1.26037	0.839227	1.23894
	1.24772	0.621991	0.808111	0.713924	2.37943
	1.44001	0.850022	1.41781	0.730047	0.977251
	1.16732	1.02808	1.93502	0.842303	0.893552
	1.37024	0.793961	0.896473	0.704344	0.78721
	0.834687	1.5987	1.22936	0.63366	0.895108
	1.21847	1.58125	1.76317	0.792106	1.13456
	1.53545	0.748648	0.976265	0.850534	0.874371
	1.63224	0.908629	1.76708	0.565221	0.491071
	0.458476	1.17625	1.54973	1.24131	0.69102
	1.60816	0.99358	1.3675	1.40996	1.55174
	1.17459	1.4893	1.5873	0.679099	0.593436
	1.27178	0.652196	1.23889	0.887583	1.18296
	0.834517	1.20101	2.48764	1.20785	0.679374
	1.2109	1.22935	1.07678	0.540452	0.725748
	1.43923	1.8243	1.25518	1.72728	0.59374
	1.75074	1.25764	1.32364	0.64643	0.864196
	1.63032	1.19004	2.64248	0.831874	0.935361
	1.25218	1.13537	1.43814	0.792106	1.34506
	0.818857	1.47069	0.977	0.976471	0.946035
	1.08672	0.982967	2.23478	0.937246	0.789701
	0.837628	0.721518	1.43675	0.654231	1.296
	0.581176	0.721889	1.07546	0.739265	0.950984
	1.13928	1.38776	1.36637	0.753598	1.37033
	1.66626	0.866592	1.99706	0.957326	0.405512
	3.20068	0.975176	2.51315	0.671684	1.04622
	1.55647	0.977065	1.23492	0.930939	0.794507
	0.805323	1.04757	1.81682	0.593064	1.25619
	1.59151	1.2871	2.21446	1.38672	1.14091
	0.73995	1.47358	1.06748	0.796421	0.705818
	0.703601	0.713556	2.68693	0.89276	0.640227
	1.09416	0.639778	1.65139	0.847929	0.949716
	1.35018	1.69675	1.99836	0.795683	0.89723
	1.38433	1.66716	1.37043	1.66971	0.562535
	0.954982	1.41987	2.32578	0.675948	0.743565
	1.9974	1.15828	1.42912	0.948157	1.40367
	2.08447	1.35754	1.04383	0.405512	0.990307
	1.26678	1.01312	1.40604	0.536713	1.82299
	1.55303	1.15772	1.319	0.405512	1.48934
	1.50393	0.974072	1.22735	0.607991	0.86407
	0.923277	0.840266	1.37078	1.12803	0.514169
	1.6755	1.42013	1.00705	0.827724	1.11275
	1.06041	1.39824	2.11226	1.03414	0.907149
	1.51694	1.13941	0.866526	1.19434	0.750392
	1.36733	1.09846	1.39263	1.28096	1.65044
	0.885127	0.749762	1.32168	1.01461	0.729564
	1.28183	1.3037	1.62895	0.716575	0.983909
	1.14829	0.878021	2.184	0.451534	0.776106
	1.16573	1.19913	1.27633	0.653127	1.45254
	2.42632	1.76086	1.69391	0.630682	0.723989
	1.74055	1.54194	1.64668	0.621972	1.98053
	1.05939	0.698085	1.55616	0.405512	0.728596
	1.34926	0.897939	1.29465	1.08695	1.41856
	1.70305	1.81035	1.25307	1.55667	0.815374
	1.32309	2.03144	1.60289	1.0723	1.30626
	1.70988	1.00325	1.21152	0.681059	0.813938
	2.34462	1.50644	1.81211	0.632765	0.903559
	1.15138	1.22784	2.68848	0.63366	1.33446
	2.67504	1.27298	1.84037	0.968928	1.04051
	1.933	1.32461	2.23076	0.919652	0.526617
	0.678228	1.35929	1.2025	0.977875	1.34855
	1.75389	0.743133	1.1459	0.954625	1.51042
	1.65609	1.52382	2.17101	1.01796	0.77558
	1.27648	1.90379	1.15761	0.861006	0.959464
	0.975563	1.08348	1.00861	0.405512	1.33591
	1.56184	1.49771	2.01032	0.934458	0.581414
	0.840959	1.34279	1.93591	0.587617	0.920266
	1.16516	1.3812	1.60508	0.733039	2.23553
	0.946414	0.854409	1.54776	0.798454	0.788789
	1.76459	1.43923	2.00249	0.775453	0.965392
	1.70949	0.897624	2.14937	0.789028	0.944471
	1.29356	1.28657	0.909985	0.654231	0.953623
	1.68845	1.30215	0.716821	1.03751	0.548013
	2.1792	0.818157	0.702113	0.739485	1.46931
	1.86719	1.17615	1.89592	1.08406	0.946372
	1.30242	0.602551	1.59568	1.39361	1.00157
	1.01797	1.14053	1.62068	0.990517	0.935048
	1.68071	1.15552	1.40053	0.84977	1.20411
	1.52432	1.5577	2.34595	1.28545	0.782802
	0.901266	1.49989	0.933647		0.769643
	1.10962	0.978914	1.28108		0.443609
	1.12804	0.823862	1.23178		0.883291
	1.86339	0.684305	2.13726		0.607991
	1.3989	1.62384	1.57941		0.874987
	1.02125	1.10478	1.94087		1.26435
	0.789396	1.1199	1.55346		0.933041
	1.28728	0.94968	1.67064		1.14731
	1.94207	0.739108	1.592		0.598205
	1.80866	1.07293	1.02889		1.3485
	0.813967	0.66999	1.64167		1.57156
	1.28252	1.10033	0.984575		1.13396
	0.501331	1.3243	0.632936		1.41293
	1.35174	0.900554	1.13872		0.910079
	1.1131	1.10335	2.9842		1.16432
	1.08659	0.887513	0.783705		1.32347
	1.39482	0.884932	2.65913		0.875459
	0.814813	1.29019	0.882571		0.691719
	0.997823	1.13523	3.04446		1.34253
	1.41938	1.09148	0.789713		1.12245
	0.844213	0.797277	1.22332		1.06624
	1.40772	0.989766	1.22472		1.22124
	1.52058	0.762585	1.2115		0.923061
	1.12098	1.32147	1.69358		1.72401
	1.43586	0.690202	1.10194		0.958878
	1.02433	1.07345	1.22259		0.804668
	2.14401	1.13773	1.73676		2.63583
	0.857362	0.912271	1.05996		1.64284
	1.06889	0.608945	1.2384		1.80524
	0.709861	0.716575	0.743133		0.59842
	1.00424	0.693769	0.497318		0.690232
	1.03467	0.6461	1.56798		0.676365
	1.3645	0.833601	0.840436		0.359056
	0.914143	1.36358	1.28989		1.35783
	1.32494	1.20053	0.95421		0.556602
	1.38085	2.07914	1.37647		0.695006
	0.789141	0.920288	0.983039		1.07677
	1.70946	1.09328	1.55925		0.858001
	1.37024	1.41733	1.88547		0.359056
	1.62177	1.26637	1.37861		1.26137
	1.24672	0.84207	2.09253		1.26509
	0.896687	1.01085	1.15101		1.24847
	1.5423	0.9109	1.96531		1.36835
	1.02997	1.36494	0.590301		1.16945
	0.844763	0.935361	1.00902		0.596381
	1.63765	0.713254	0.701612		0.907167
	2.51377	1.19787	0.884561		0.656203
	2.17879	1.0632	1.45086		0.88275
	1.82903	1.63227	2.17321		0.771984
	0.709409	0.359056	1.51425		1.22257
	2.80763	0.923314	1.11548		1.03422
	1.17191	0.903654	2.45605		0.68334
	0.914126	1.28965	0.913159		0.736455
	1.15047	1.35699	1.49395		1.52217
	1.4683	0.859442	2.11112		1.0982
	2.31331	0.806646	0.668407		1.03724
	1.19627	1.31498	1.59977		1.38132
	1.50193	0.859986	0.550452		0.443609
	1.53974	1.74404	1.11655		0.938673
	1.00635	1.06235	0.769573		0.953108
	1.23322	0.527271	1.37739		0.701093
	1.25268	1.0216	1.75343		0.966838
	1.55861	0.901456	2.41706		0.645614
	0.960668	1.18771	1.6909		0.658193
	1.07783	1.14974	1.6932		0.819382
	1.38893	1.23286	2.41509		0.68105
	1.76562	1.71271	0.969043		0.727598
	1.12743	0.927028	2.82647		1.32231
	2.41404	1.16336	1.42718		1.12141
	1.26053	1.7401	0.769977		1.54039
	3.0379	1.09263	1.28849		0.64124
	2.81771	0.759952	0.800986		1.69223
	2.29429	1.26472	1.70181		1.38874
	3.33154	1.69378	1.26134		1.0523
	1.34798	1.82385	3.37214		0.948562
	1.40804	1.01441	1.98669		0.405512
	2.63981	1.11303	1.85946		0.977451
	2.62296	0.993194	2.00242		2.14619
	3.44195	1.25174	2.05765		0.99788
	1.3201	1.49878	2.91712		0.926602
	1.1798	0.359056	2.30797		0.895931
	1.25767	1.07123	2.71793		1.25193
	1.39484	1.63548	1.68053		0.878098
	1.51828	1.34459	3.08061		0.945755
	1.30716	0.898637	1.53224		0.813917
	0.952412	1.20378	2.13206		0.887917
	1.01219	0.710334	1.66436		0.921112
	1.18881	0.685318	2.01696		1.14579
	2.34079	1.12055	1.15501		1.53711
	1.58039	1.77071	2.00376		0.587617
	1.70746	0.866402	1.54984		1.09549
	1.428	1.20247	1.34087		1.25202
	1.37352	0.695112	0.463193		0.969798
	0.978906	0.443609	2.83628		0.713924
	1.96556	0.747667	1.45686		1.16017
	1.64197	1.07798	1.4252		0.899416
	2.03586	0.721003	1.70217		0.876437
	1.27902	0.910841	1.58803		1.04343
	1.33966	1.95959	1.21107		1.29582
	1.56978	0.977459	1.40626		1.02018
	1.44562	1.27963	1.34663		0.405512
	1.68849	1.05036	1.43386		1.99562
	1.33622	1.67273	1.25987		1.36067
	1.52265	1.29943	1.92816		0.411032
	1.0196	1.65127	2.84684		0.975641
	2.16176	0.443609	1.67471		1.23683
	1.54962	1.27595	1.63104		0.443609
	1.33426	0.359056	1.63958		0.942459
	0.723897	0.593064	1.67855		0.860484
	0.584171	0.932964	0.750189		1.04703
	0.405512	1.17064	0.703601		0.908886
	1.28165	1.23272	0.992614		0.841128
	3.54421	1.08466	2.40914		1.32754
	1.17754	2.16558	0.747136		1.171
	1.99179	0.576629	2.46102		1.16551
	1.95566	2.05422	1.98538		0.992391
	1.30893	0.762997	0.958702		1.15679
	1.83425	1.05486	2.12638		0.758335
	1.90468	1.68818	1.09518		1.45016
	1.93281	1.06065	1.10926		0.728202
	1.59948	2.028	2.85091		1.0126
	0.979349	0.821138	1.32047		0.909665
	0.947477	1.25415	1.45304		0.990384
	1.41844	0.822745	1.72303		0.900024
	2.20928	1.08417	1.82126		1.16484
	1.20616	1.42894	1.34373		1.24438
	1.83868	0.850452	3.48544		0.735083
	0.359056	1.38219	2.05112		0.866001
	1.07481	1.04744	0.854871		1.4633
	2.75015	1.3864	3.57759		1.7677
	1.48724	1.19743	1.08268		1.23843
	1.44804	1.08708	1.41757		2.10656
	0.658187	1.042	1.45458		0.706689
	1.31585	0.773436	1.86325		0.930045
	1.18496	0.627496	1.31065		0.822745
	1.93203	1.1394	1.40732		0.568514
	1.6259	1.10047	2.88318		1.92854
	1.14509	0.786952	1.32834		1.45188
	1.6507	1.57323	2.02044		0.851589
	1.74095	1.20303	1.77001		1.53692
	1.45863	0.875976	2.23311		1.09163
	1.36073	0.801399	1.65092		0.517811
	0.713556	0.405512	1.47665		1.34239
	1.34295	1.35578	2.83965		0.405512
	1.99598	1.07465	1.45832		0.556088
	1.25788	0.642759	3.53226		0.810253
	3.00143	1.22308	1.33724		1.59545
	1.53965	1.09797	2.2922		0.785764
	1.02945	0.994791	2.11973		1.48415
	1.16179	1.44291	1.41248		0.910365
	1.31076	1.08656	2.4778		0.405512
	1.37606	1.07002	1.275		0.633399
	1.29664	1.85355	1.41355		0.733039
	1.66246	1.80115	2.08516		1.02363
	1.60015	1.21545	1.57625		0.754157
	0.959442	1.08348	1.61383		1.05126
	1.89959	0.535262	1.63658		0.825626
	0.637012	1.02554	1.79601		1.30394
	0.939446	1.43549	1.98898		0.98858
	1.26442	0.75075	1.78504		1.15186
	1.33941	0.798306	2.0491		0.78721
	0.92099	0.876532	1.81268		0.411032
	1.09446	0.458476	1.81965		1.36871
	1.26765	1.7635	0.952152		1.15292
	0.501713	1.36978	1.89384		1.07822
	1.00748	1.19167	3.52318		1.37853
	1.20251	1.24609	1.8321		0.775864
	1.46196	1.19094	2.26694		0.829345
	1.172	1.07998	2.79426		1.14905
	1.10296	0.719729	2.08897		0.955149
	1.0751	1.59234	2.88423		0.726494
	1.47605	0.752532	2.29626		1.2648
	1.77055	1.36069	2.25339		0.802414
	1.30234	1.24638	1.5657		1.67606
	2.1417	1.32564	2.11774		0.559225
	1.78974	0.405512	1.23164		0.905483
	1.50094	0.796002	2.29575		0.683609
	2.11797	1.01064	2.71464		1.7778
	1.92317	1.01188	1.0874		1.07825
	1.15012	1.53081	2.09047		0.779459
	1.38176	1.09218	2.09251		0.501938
	0.963591	1.0981	0.793763		1.45387
	1.06448	0.812293	1.38487		0.840766
	2.27551	1.01887	1.60574		1.16117
	1.17969	0.961783	1.4989		0.810701
	1.0527	1.86464	2.83101		1.01975
	1.27096	2.2672	3.69598		1.09041
	1.03622	1.09549	1.19672		1.03219
	1.25731	0.587617	3.99303		0.708649
	0.977256	1.28105	1.61973		1.01773
	1.97615	1.66777	1.27939		1.26457
	1.52661	1.45396	1.2165		0.930941
	1.44872	1.06115	1.34218		0.910617
	1.99929	1.12147	1.55361		0.85664
	0.971044	1.08981	2.89477		0.965763
	1.19135	1.2044	1.27035		1.14806
	1.00848	0.405512	1.82651		0.851589
	0.865905	1.76884	2.26908		0.4701
	1.59652	0.85273	1.46768		1.87859
	2.30702	0.814594	2.34302		0.63945
	2.82359	1.31405	2.08678		0.697667
	2.42211	0.871772	1.76299		0.635322
	1.29963	1.01075	2.19305		0.768739
	0.83297	0.818608	1.26909		1.21907
	1.74193	0.804685	0.463193		0.595236
	1.07134	1.23028	2.69261		0.731772
	1.73512	0.673939	1.1298		0.458476
	1.2667	1.12043	2.91322		0.927345
	1.83054	1.19531	1.49414		1.37565
	0.858128	1.28741	2.05923		0.576174
	1.82031	0.869047	2.19319		1.55892
	1.44041	0.832478	2.12786		0.901825
	1.60946	1.22603	0.655974		1.31021
	1.03009	1.40611	0.768242		1.03079
	0.857513	0.581176	1.10929		0.568396
	0.845925	1.35607	2.04558		0.623626
	2.0034	0.867382	2.01585		0.359056
	1.66768	1.42479	1.80196		1.16477
	1.56257	1.56079	1.66696		0.697241
	1.0737	1.18051	1.40769		0.980263
	0.739279	0.664279	1.38634		1.65837
	2.9812	1.35304	0.670986		0.675721
	1.27457	1.41833	1.54853		0.978367
	1.01405	0.99791	1.86388		1.93833
	1.99165	1.22374	1.34205		0.735502
	0.585678	0.804077	1.91615		0.670394
	0.830184	1.12714	2.77438		1.54706
	1.15637	1.60373	2.03022		0.807046
	1.1291	1.0514	2.22824		1.22827
	1.34849	1.22419	2.75598		0.988136
	1.31351	0.928333	1.88345		1.34844
	3.40027	0.688753	1.27593		0.556088
	1.4438	0.712358	1.63165		1.04624
	0.608306	1.31615	2.14014		0.983424
	1.17985	1.24059	1.99474		1.54222
	1.35571	0.749058	2.12718		1.09693
	1.75353	0.836647	1.80893		1.62401
	0.821412	0.451534	1.56835		1.41027
	1.4656	0.568396	2.86206		0.587617
	0.852887	0.729564	1.86195		0.83756
	0.775261	0.937604	0.927028		1.07617
	1.02142	0.845882	1.07755		1.13218
	0.707457	1.2326	0.903292		0.895663
	1.71836	0.860925	1.47267		1.27974
	1.13582	1.09968	1.18281		0.98461
	1.03516	1.01929	1.2821		0.990785
	1.92908	0.997655	0.636911		0.998525
	1.83196	0.501938	2.10329		0.8883
	1.78973	1.3696	1.78194		2.0676
	2.08622	1.0008	1.715		0.841692
	1.16777	1.18694	2.34308		0.648034
	1.39764	1.32182	1.45662		0.981376
	1.10095	0.913599	0.590301		2.09781
	1.24476	1.4324	1.8637		0.9469
	1.30016	1.28264	1.51911		1.21711
	1.14725	0.737307	1.48949		0.451534
	0.794806	0.704105	1.89859		1.25106
	1.32749	1.41929	1.7505		1.50918
	1.25577	1.15575	1.30919		1.42299
	1.12272	1.43292	1.80081		2.11863
	1.30402	1.24246	2.01585		0.623327
	1.28879	1.01572	1.65342		0.878008
	0.829904	1.18189	2.41307		1.23812
	1.21514	1.11841	4.39887		1.2131
	0.709195	0.818608	2.21936		1.47015
	1.10704	0.844763	2.28421		1.18437
	1.52584	1.45704	2.97042		0.929335
	1.37225	0.988629	2.04377		0.736503
	1.47196	0.999007	1.28133		1.15848
	0.932509	1.1488	2.77808		1.17385
	1.47761	1.52984	0.879004		1.38439
	1.06242	0.896433	2.15487		1.59955
	0.608945	1.87317	0.665748		0.940045
	1.84614	0.871814	2.1146		1.37147
	1.19048	0.736935	1.77986		0.91454
	1.13403	1.33639	1.7594		1.82917
	1.36918	0.566287	2.2201		1.57611
	1.33189	1.43442	2.80212		0.774455
	1.45065	1.63616	2.80697		1.73363
	1.15695	2.88106	1.85849		1.80755
	1.33441	1.26974	1.44764		1.26504
	1.68439	1.3217	1.99615		1.17796
	0.621323	0.952179	1.91209		1.57959
	0.607314	0.607904	1.84206		1.05424
	1.50375	1.19945	2.34325		1.05002
	2.19782	1.23871	1.68109		0.834275
	1.47555	1.67552	2.78675		0.753323
	1.28561	1.24106	0.95977		1.06498
	1.03743	1.64691	2.67663		1.37357
	1.18835	1.23212	1.14438		0.937396
	0.857698	0.936052	1.42355		0.639778
	1.48988	0.888955	2.13455		1.05297
	2.31975	0.998084	1.86923		1.34255
	1.75325	1.14233	1.63097		0.840823
	2.11927	0.831877	1.51094		0.855334
	1.66132	1.23237	2.71063		1.36619
	0.910841	0.443609	1.99488		1.70714
	1.02934	0.696925	1.26028		1.07239
	2.01291	0.942705	1.88044		0.981042
	1.56427	1.48318	1.6827		1.24201
	2.00461	0.814685	1.96596		1.27509
	0.762231	0.87983	2.11957		1.68041
	1.34259	0.359056	1.82618		0.359056
	1.7175	1.55015	1.53853		1.37882
	1.41545	0.730047	1.60712		0.837785
	0.411032	1.33604	1.73951		0.781609
	1.60337	1.01114	1.60344		0.997199
	1.81258	1.16448	1.53524		0.629185
	1.62515	1.27933	2.17431		1.16672
	1.90868	1.96234	1.8793		1.36552
	1.51122	0.405512	1.13222		1.11771
	1.40463	0.750392	2.50657		0.443609
	2.61129	0.867475	1.47136		1.52174
	2.09959	1.09693	2.06206		1.08299
	1.25095	1.56704	1.87775		0.958386
	2.08769	1.56719	2.24559		1.73879
	1.34352	1.64131	2.93074		1.85674
	1.31625	1.29061	1.47607		1.3327
	1.79179	0.847329	1.51165		0.999826
	1.13514	0.9438	2.6704		1.41424
	1.26823	1.23376	2.1546		0.77667
	1.68114	1.41504	2.37195		1.48558
	1.99923	0.78935	2.24637		2.2719
	1.35337	0.762585	2.34774		1.94445
	2.21613	1.27498	1.91307		1.61234
	1.96928	2.06853	1.69414		1.14397
	1.91593	1.3125	2.31532		1.16928
	1.30223	1.18971	1.26054		1.9144
	2.1739	1.44347	2.56677		2.10884
	1.48845	1.98846	1.91055		1.62049
	1.26767	0.848821	0.748648		1.73801
	1.29429	0.600547	3.14193		1.06143
	1.12205	1.76979	1.99432		1.07716
	0.933722	2.42025	2.43117		1.8461
	0.977923	1.0042	2.14009		0.675948
	2.1618	1.46888	2.30988		1.36762
	1.25757	0.669089	2.73463		1.39
	1.68699	1.47177	1.55539		1.2006
	1.59207	0.458476	2.78905		1.09004
	1.67978	1.3582	1.80538		1.05872
	1.17316	1.16822	0.731635		1.14443
	1.13498	1.18334	1.69533		0.674923
	1.36865	0.773079	1.5229		1.00699
	0.502535	1.39744	1.02555		1.20763
	1.23109	1.10246	0.943654		0.978193
	1.9244	1.23549	2.03668		1.1885
	0.961636	1.03136	1.23421		1.38347
	1.47872	0.986905	2.184		1.05531
	1.13484	1.52936	1.56515		1.5876
	1.10193	0.901825	2.49422		1.00762
	1.72517	0.690202	2.00093		1.44497
	2.03604	0.786476	0.745037		1.32699
	1.1534	2.22804	2.18938		1.10728
	1.90759	1.08018	2.75203		0.903795
	1.71997	0.73933	1.12567		1.5377
	1.75589	0.843153	1.4681		1.06308
	1.84113	1.2311	2.12358		1.27716
	1.04051	1.13567	1.31042		0.627496
	1.63336	0.676365	0.849996		1.55106
	1.54117	1.12555	1.79373		1.52657
	1.36284	0.790491	0.98579		0.943542
	1.59008	0.770601	1.37014		0.956906
	1.05607	0.994228	1.95983		0.92736
	1.34319	1.12445	1.5408		1.10357
	1.02769	0.926653	2.20252		1.28482
	2.0303	0.782399	1.04063		0.405512
	1.92456	0.713231	1.49249		1.02504
	0.888734	0.7933	1.42166		0.905904
	1.57818	1.3201	1.00718		1.21096
	1.27371	0.951785	1.21549		0.94648
	1.52471	1.28384	1.62333		1.85706
	1.23593	1.26902	2.02979		0.794576
	1.34519	0.818799	2.52298		1.49402
	1.51896	0.890293	1.72954		1.27974
	0.668407	1.90512	1.83972		0.870894
	1.56034	1.74212	1.4301		1.20897
	1.42463	0.980129	1.84933		1.03658
	1.31805	0.642759	2.20375		0.744956
	1.76394	1.08323	1.92061		1.07137
	0.59704	0.78176	1.58095		0.986956
	1.80742	1.38421	2.25406		0.764829
	0.943258	0.675948	2.30108		0.825566
	1.99586	0.842336	0.497318		1.31249
	1.03898	0.787428	0.587617		0.870701
	1.84645	0.928446	2.38333		1.44109
	1.20927	1.1617	1.6624		0.608945
	1.60183	0.719729	2.58614		1.3
	1.09339	1.07259	1.77981		0.99699
	1.14494	1.33161	1.8636		2.14294
	1.03674	0.535262	1.76868		0.913804
	0.652196	0.895673	2.72528		1.21934
	1.51664	1.78725	2.5838		1.14065
	1.23464	1.07197	2.32307		1.41949
	1.46133	0.881663	1.49255		0.990415
	1.76882	0.4701	1.16488		1.88501
	1.04272	1.14698	2.56948		1.11881
	1.20528	1.15729	1.61338		1.23687
	0.952125	1.01789	2.47519		1.13945
	1.0634	1.14942	1.40039		1.04787
	0.726772	0.783808	1.90457		0.827276
	2.09783	1.02451	1.49363		1.41752
	1.57142	1.00935	1.8598		0.885335
	0.642759	1.52917	0.763135		0.869566
	0.960546	0.802668	0.77651		1.49577
	1.86342	0.739265	2.08819		0.580038
	2.77621	0.762679	2.10755		1.43909
	2.7174	1.22158	2.97222		1.4043
	1.41094	0.760591	1.59804		0.779008
	1.81669	0.793292	2.41712		1.69228
	1.92959	0.69102	1.69884		0.405512
	1.1082	0.608079	1.66427		0.979696
	2.26221	1.56355	2.02521		1.1304
	1.26678	1.12473	2.13757		1.27694
	3.44869	0.82094	1.71655		0.766175
	1.03125	0.957325	2.33299		0.993328
	1.36672	1.28657	0.727357		1.11366
	2.15674	1.05496	1.55354		1.27079
	2.33563	1.23368	0.985606		0.608306
	1.11482	1.1857	4.28662		0.787953
	1.4494	0.966091	2.29412		0.529313
	2.17148	0.959493	2.36629		0.451534
	1.06269	1.18542	1.58214		0.93531
	2.15078	0.911276	1.93607		0.930193
	1.20622	0.947697	1.56127		1.13302
	1.65075	1.00042	2.08533		1.86914
	1.56307	0.897652	1.47923		0.847105
	1.46474	1.07504	2.25888		1.32697
	1.40243	0.701093	2.24849		1.4059
	1.2375	0.99068	1.70457		1.18891
	2.04286	0.941043	1.21443		1.7055
	1.3254	1.03011	2.0587		0.941116
	1.29247	1.51017	2.09291		1.26626
	1.54874	0.359056	1.65557		0.730047
	1.45001	1.077	2.77629		1.16823
	2.09406	0.827875	1.58221		1.10347
	1.58292	1.2607	1.73703		0.886522
	2.14963	0.910004	1.85924		1.34185
	0.61	1.09673	1.66401		0.490064
	1.48484	0.866646	1.6178		1.23008
	0.859513	1.28447	1.83969		1.09101
	1.86974	1.58862	1.06898		0.770635
	1.47939	0.639096	1.42821		1.59389
	1.19003	0.926631	1.07025		0.978226
	1.66322	0.615111	1.37627		0.884953
	1.24845	1.0632	1.11348		1.21265
	1.11475	0.838291	2.12637		0.846276
	0.943296	1.55663	2.11026		1.36938
	1.48338	1.24085	1.192		0.814594
	0.83749	1.66158	1.35843		0.618055
	1.2928	1.13146	2.26697		1.26329
	1.85655	1.65591	2.02145		0.964351
	0.87775	1.04937	1.45105		1.12695
	1.26166	0.621585	1.25542		2.11168
	1.53014	1.66214	1.10024		1.11352
	1.72023	1.30747	0.828572		1.34384
	0.886377	1.09246	1.80096		0.696045
	1.21072	0.735095	1.10786		1.92595
	0.889741	1.41888	1.85116		1.0116
	1.29072	1.87304	1.71819		1.5957
	1.49528	1.47187	1.06746		0.62186
	1.4352	1.43525	2.23967		0.608945
	1.92056	2.3256	1.22669		0.996517
	1.76927	1.50661	1.15403		1.2871
	0.77002	1.41493	1.27917		1.76368
	0.630919	1.39071	1.05155		1.20353
	0.639096	1.57191	1.4995		1.01858
	1.95401	1.53711	2.31617		0.799491
	1.54241	0.9168	0.901351		0.882462
	1.21691	1.10296	1.39511		0.962494
	1.43781	1.32855	1.52819		1.76614
	1.08922	0.929233	2.84484		0.633399
	1.79516	1.08904	1.35636		0.644181
	1.20515	1.0974	1.68639		1.00789
	1.05433	1.54355	2.37329		1.19443
	1.06061	1.66836	1.91007		1.24506
	0.791666	0.861553	1.9405		1.31702
	1.50811	1.32268	1.57556		1.02611
	1.23724	0.704473	2.29309		1.82757
	1.13592	1.05104	1.60619		0.976629
	0.359056	0.96771	1.26772		1.76875
	2.12508	1.18461	2.06075		1.05139
	1.8103	2.74209	1.55871		2.06174
	1.57739	1.40951	2.1907		1.41257
	1.17202	2.26494	1.82622		0.834839
	1.42718	0.550452	1.86954		1.48405
	1.50422	1.66108	1.69187		1.46189
	1.83538	2.10299	2.59169		1.19983
	1.48775	1.56163	1.45799		1.86007
	1.0689	1.09594	1.27638		1.23807
	2.29118	1.79592	2.47537		1.46616
	2.00657	1.39404	2.25004		2.30276
	1.81109	1.12566	2.40492		0.405512
	2.22946	1.86397	1.62698		1.77127
	0.909559	1.78097	2.13932		1.25811
	1.98928	1.53253	2.12057		1.52477
	1.5506	0.819401	2.07774		1.24235
	1.29129	2.18047	2.68863		2.18995
	1.30609	0.881243	1.93401		1.64638
	1.62457	1.47917	2.2073		1.11831
	1.64606	1.61673	1.34047		0.359056
	1.09522	2.30655	2.01472		1.18296
	1.9327	1.34242	2.65204		1.22873
	0.515531	1.96717	1.93936		2.56014
	1.24721	1.42483	2.28639		1.58142
	1.07016	1.73345	0.839026		1.09106
	1.58734	0.991771	1.79722		0.828572
	1.89227	1.70623	1.99957		0.921221
	0.787543	1.46615	1.07152		1.07035
	0.936679	1.71745	1.98392		0.807204
	0.713364	1.22237	2.44109		1.83053
	0.938821	1.38275	1.59		1.18549
	1.13303	1.61793	1.54809		1.32851
	1.34787	1.17413	2.08658		1.21056
	1.76718	1.37479	1.85623		0.529313
	0.679914	2.13678	1.64751		1.34866
	1.12173	1.21712	1.86436		0.968762
	0.855455	1.22726	1.87876		1.16352
	1.65714	1.03263	1.97002		1.29254
	0.910621	1.7523	1.77974		1.23375
	1.12013	1.73039	1.75728		2.00651
	1.11251	1.25714	2.16751		1.12041
	1.04014	1.86769	3.02243		0.853209
	2.11741	1.38559	1.06452		0.405512
	0.696925	1.18167	3.11796		1.15332
	1.65327	1.7009	2.44873		1.31127
	1.40348	1.58213	1.17615		1.44962
	1.50026	2.35153	1.8909		0.968186
	1.61793	1.24852	2.38395		1.28869
	0.914219	0.866683	1.88714		1.15688
	1.5377	1.23249	2.3113		0.809075
	1.57089	1.48325	1.50352		2.363
	0.993682	1.64278	2.41811		1.46317
	1.61406	0.836955	2.18385		1.12858
	1.18302	1.44358	1.6542		0.565221
	1.54398	1.62198	1.07221		0.652196
	2.41325	0.876049	2.96943		0.890855
	1.94691	1.61119	3.17534		2.01697
	1.52337	2.12677	1.56649		0.996286
	1.0238	1.42466	2.66471		1.32492
	1.73463	2.36877	0.490064		1.43032
	1.55011	2.24025	2.4697		1.29467
	2.30501	2.05935	2.25773		1.70787
	2.2542	1.27442	1.6241		0.788978
	1.3711	1.19456	3.72642		1.13419
	0.815051	1.20649	1.42909		1.03228
	1.92321	1.12149	2.23097		1.19073
	0.937491	1.07443	1.2384		1.59146
	1.46252	1.19545	2.37206		1.41775
	1.6585	1.35536	2.4448		1.25998
	0.957783	0.81933	3.76103		1.15076
	1.73202	2.63098	2.05373		0.997996
	1.58323	2.23077	2.48286		1.33858
	0.964732	1.06631	1.41628		1.04517
	1.22646	1.0527	2.01225		0.881447
	0.932578	1.98505	2.05438		1.25395
	1.13096	1.41013	1.80345		0.917387
	1.56648	1.74255	1.90767		1.22233
	1.50375	1.07367	1.59793		0.87892
	0.815216	0.695383	1.90968		1.21232
	1.36251	1.53551	2.44296		1.32856
	0.946858	0.766207	2.46972		1.79086
	1.28755	1.66458	1.38372		0.937132
	1.442	0.87634	1.15848		0.909271
	1.65754	1.74827	1.48414		0.99433
	1.25072	1.56211	1.65173		1.02489
	0.89723	1.60016	1.64087		0.92856
	1.17071	1.29804	0.936256		1.03389
	0.882571	1.03981	1.39211		1.05453
	2.14301	1.60369	1.65925		1.37354
	0.788186	1.61189	2.6393		1.44542
	1.74644	0.789695	1.32745		1.32744
	1.31985	1.22439	1.07929		1.12153
	1.40857	1.39112	1.52596		1.19114
	1.39411	1.3969	2.74876		1.23563
	1.19526	1.22093	1.67515		1.41041
	0.920403	1.10912	0.610738		0.815414
	0.84379	0.821865	1.49687		1.77236
	1.2363	1.60045	1.3853		1.51986
	1.89498	0.935005	1.74248		1.82047
	1.11895	1.20292	1.30002		0.888345
	0.763135	1.98172	1.58671		1.32278
	0.4701	1.289	1.80882		1.58478
	1.21533	1.1437	1.88993		0.83625
	1.03169	2.01262	0.789542		1.37312
	0.804714	1.28082	1.69099		1.00518
	0.882558	0.881756	0.451534		0.699096
	1.44247	1.82241	2.49051		1.10775
	1.09977	1.44375	1.38557		1.17475
	1.25187	1.51644	1.4549		0.756776
	1.48122	1.28536	1.13511		0.723909
	0.967356	2.03416	0.998656		1.72521
	1.36543	0.902985	1.97767		0.998676
	1.15329	2.00385	2.6569		0.983669
	3.02118	1.03678	0.568396		1.53757
	1.39936	1.66896	1.78016		1.15161
	1.05731	1.72931	1.2821		0.877846
	1.72851	0.689555	2.92605		1.25657
	1.82011	1.55951	1.93282		0.980118
	2.34958	1.85379	0.952179		1.6068
	0.977392	1.69047	0.753548		0.998639
	1.10861	2.04696	1.86786		1.13859
	2.00951	1.29052	2.32879		1.38523
	1.95293	1.74716	1.31634		1.38606
	1.38448	1.4471	1.93986		0.822733
	1.96726	2.13208	2.48706		1.67471
	1.21581	1.53993	0.814276		0.912842
	1.09787	1.22583	2.38715		1.47254
	0.882854	0.850333	1.5648		1.98903
	0.738361	1.36648	1.83606		0.933033
	1.62539	1.58673	1.84602		1.07524
	2.32382	1.23212	2.52128		0.359056
	1.16973	1.37397	1.43305		1.0517
	0.522311	1.00513	2.43545		1.23785
	1.04011	1.47616	2.04384		1.30667
	1.01601	0.953675	1.33921		1.08077
	2.18247	2.39014	1.72444		1.3015
	1.37078	1.42328	1.46815		1.7232
	1.44344	1.45065	1.83454		1.15427
	0.841371	1.35729	1.82912		1.16868
	1.09878	1.68171	1.65312		1.04596
	0.710039	1.76981	3.11122		0.609661
	1.03579	1.27484	1.74442		1.18446
	1.17388	1.12798	0.992666		0.668954
	0.983895	1.3	2.15932		0.69561
	0.853129	2.24304	2.10587		0.837785
	0.657482	1.50369	1.46282		1.29076
	1.05225	1.33184	1.77934		1.2067
	0.873615	0.628863	2.55455		2.75488
	0.978914	2.14187	2.94923		1.44426
	0.864196	1.61705	2.06501		1.04097
	0.803541	2.00549	1.56309		1.29241
	1.03742	1.4705	1.69086		1.20068
	1.13959	1.50336	1.77275		1.08617
	0.664546	1.92221	3.13242		1.31983
	0.595236	1.1538	1.59695		0.746662
	1.18468	1.31932	2.24195		0.963094
	0.703601	1.46126	1.93659		0.589997
	0.730527	1.71153	0.738361		1.06299
	0.818206	1.18584	1.96316		1.3066
	0.935785	2.03301	2.04787		1.76152
	0.934203	1.82632	1.47284		0.777322
	0.843613	1.60233	1.43228		1.15373
	0.685789	1.21585	1.31368		1.29062
	0.892455	2.34116	1.14589		1.42792
	0.936451	1.72042	2.15877		1.35814
	0.839266	2.1925	2.43359		0.896487
	1.46012	2.27831	1.68382		1.09035
	1.42817	0.971044	1.78781		0.501938
	1.12615	1.79916	1.56841		1.02142
	0.681059	1.26154	2.31375		0.84812
	0.689394	1.38314	1.38664		1.00869
	0.715375	0.935361	1.52081		1.43826
	1.08657	1.65543	2.59628		1.06329
	1.04349	0.54899	1.8499		0.697241
	0.858327	1.21365	2.37171		0.443609
	0.856062	1.10688	1.77683		1.04639
	1.05581	2.30983	1.97111		1.34259
	0.489271	1.18722	1.46235		2.63992
	0.858221	2.10693	2.45038		0.975396
	0.649907	1.52382	1.97863		2.90322
	0.742728	1.88136	1.56152		0.817796
	0.868849	0.980654	1.98679		1.48104
	0.729564	1.69473	2.68391		1.40131
	0.710939	0.833919	2.37545		0.803811
	0.756776	1.82146	2.98262		1.8715
	0.885346	1.50956	1.59432		1.18668
	0.727357	1.48905	0.944837		0.614663
	0.750392	2.1848	1.32563		1.20211
	0.514169	2.0274	2.00808		1.2939
	0.682163	2.10808	1.28279		1.2471
	0.556088	1.93651	1.42109		1.36941
	1.20137	1.47011	2.47963		0.542986
	0.925304	2.42293	1.19706		0.676116
	1.00122	1.97372	1.98809		1.02482
	0.661344	1.42685	1.48526		0.756673
	0.993328	1.55064	2.53082		1.26258
	0.747667	1.64623	3.89456		1.49402
	1.19564	0.854439	1.30645		0.766506
	0.739448	1.95409	1.55587		0.654036
	0.718176	1.409	1.86288		1.25652
	0.935543	1.96503	1.81093		0.88714
	0.664546	1.29894	2.11339		0.642759
	0.71724	0.960772	1.36907		0.895053
	0.899297	2.17458	1.44745		1.54856
	0.588366	1.07424	1.0151		0.501938
	0.868186	0.983888	2.04273		0.873235
	0.580186	1.2431	2.7787		1.09334
	0.750172	1.58092	1.49198		1.3257
	0.834176	1.75579	1.44131		1.52871
	1.14177	1.6765	1.41156		0.750862
	0.936816	1.68411	1.61279		0.959757
	0.672225	1.50637	0.928758		0.761885
	0.996647	1.20148	2.03648		1.81415
	0.648888	1.72684	1.42343		1.28559
	0.638676	1.64968	1.90547		1.49534
	1.09848	2.8503	1.48395		1.05174
	0.681059	1.1347	3.37134		3.53006
	0.750392	1.79266	2.08634		0.604408
	0.629592	1.14377	1.51644		0.813804
	0.61964	1.07052	1.99657		1.37187
	1.03115	1.62628	1.78632		0.779349
	0.697964	1.13144	1.28662		1.12455
	0.682025	1.31073	0.562101		0.966014
	0.941746	1.77521	1.71002		0.78721
	0.987476	2.51679	2.47931		0.574768
	0.789828	0.733039	1.36535		1.02303
	0.828058	0.522311	2.05179		1.2231
	0.950952	0.925724	1.58511		0.874012
	0.405512	1.69342	2.62254		0.68209
	1.09354	1.16492	1.42149		1.34524
	1.36113	2.09244	1.31945		1.37982
	0.96013	1.21892	1.95314		1.44633
	0.540452	1.61286	1.29936		0.948047
	1.09113	1.12335	1.80099		0.818608
	0.830584	2.90614	1.50333		0.898432
	1.25612	1.28375	0.581414		1.32241
	0.669149	1.46195	0.99527		1.46816
	0.980676	0.63366	2.7898		1.15366
	0.681059	0.930013	1.96009		1.13015
	1.22903	1.67486	2.55414		1.2554
	0.841866	1.32879	1.80102		1.40412
	1.22196	1.40633	1.98566		0.774568
	1.28676	0.954745	2.87193		1.40704
	0.940224	1.31591	1.56031		0.98321
	1.1885	1.12647	2.54437		1.0196
	0.815404	1.31688	1.38382		0.811239
	1.30566	1.81212	2.51114		1.16558
	0.871933	1.29185	1.29417		0.870171
	0.747587	1.26936	2.06996		1.22491
	0.64281	1.17149	1.94012		0.834275
	1.61729	1.27329	2.08533		0.731001
	0.940362	2.07501	0.590301		1.29182
	0.942227	1.08281	3.04983		1.4614
	1.18548	0.780148	1.37634		1.09099
	1.21774	1.21296	1.94601		0.772329
	1.68188	2.59093	0.881825		1.16148
	1.13229	1.59027	1.57388		0.987623
	1.58092	1.43594	0.904111		1.16067
	0.666814	0.839928	2.63166		1.2969
	0.756915	1.35975	2.00534		1.34808
	1.08942	1.48673	2.53061		1.01465
	1.00737	1.30908	1.68833		1.3059
	1.001	0.917437	1.11359		1.01541
	0.814311	2.99268	2.52238		0.717589
	0.676365	1.52755	1.91222		0.755426
	1.00854	1.6034	1.75456		1.00658
	0.691105	1.57187	1.26043		0.988976
	1.45415	1.2003	1.04474		0.846168
	0.59102	1.44408	1.08494		2.01545
	0.568514	1.72145	1.26219		0.846811
	0.854395	2.06005	2.91923		1.34847
	0.720008	0.723491	1.1727		1.00752
	0.529313	1.72273	1.93979		0.913599
	0.84802	1.15346	1.12336		1.20123
	1.06549	0.610738	2.41236		0.82226
	1.18296	1.50171	0.849816		1.43763
	0.786382	0.988245	2.19197		1.37126
	0.543323	1.93575	1.89222		1.2409
	0.758228	1.13005	1.43327		1.2929
	0.683661	1.3406	0.694878		1.2448
	0.902949	1.87861	0.939023		1.37888
	1.24074	1.26425	1.72582		2.89012
	0.752773	2.17809	1.91553		1.23619
	1.24725	1.39829	1.37596		0.779808
	0.359056	1.49814	0.875404		0.765844
	1.22658	1.14641	2.59512		0.984505
	0.815919	1.7902	1.33651		0.761459
	0.844757	0.974734	1.44796		0.800463
	0.880031	1.34031	1.35628		0.870628
	1.01457	2.04046	2.53424		1.64883
	0.746683	0.819064	2.3791		0.645891
	1.1081	0.963831	0.815246		3.92797
	0.740875	1.65844	1.0737		1.40816
	0.916114	1.31773	0.69368		1.17234
	0.687538	1.12766	0.707502		1.48269
	0.762118	1.29728	0.443609		1.53472
	1.01096	1.71374	1.31543		0.774238
	1.22603	1.94004	1.98806		0.801063
	0.75372	1.04469	1.18343		1.00474
	1.0608	1.65075	1.4233		1.17569
	0.924688	1.0086	1.31925		1.55631
	1.14425	1.21888	1.42918		2.14598
	0.837122	1.20362	1.50027		0.763279
	0.661344	1.31111	2.17493		2.57347
	0.73994	0.865713	1.18244		1.38881
	1.23383	1.55039	1.33855		1.38054
	0.727357	1.12262	3.14509		0.676976
	0.654231	0.828816	1.08939		1.33685
	0.899883	1.6295	1.54211		1.16482
	0.787552	0.80241	1.53796		0.784687
	1.06736	1.27243	2.01408		1.19257
	1.03682	1.42009	1.92098		0.961328
	1.24542	1.4847	1.73274		0.587617
	0.773416	1.39378	1.17696		2.46113
	1.45581	1.47873	1.64621		0.731001
	0.405512	1.69925	1.31091		1.07146
	0.682185	1.66007	1.65711		0.725849
	0.793233	1.88844	1.22373		1.09572
	0.760561	1.4919	1.53235		1.17609
	0.732912	1.58745	1.0706		0.821435
	0.623327	1.01197	1.35431		0.825795
	1.33136	1.73603	0.805126		0.75755
	0.791787	1.39641	1.62322		1.09035
	0.679749	0.661344	1.71091		1.17747
	0.666615	1.98916	1.17463		1.20967
	1.00084	1.85512	1.5523		0.581176
	1.03405	1.45315	2.0918		1.7236
	0.745984	2.16503	1.52344		1.04452
	1.88298	2.68592	2.29956		1.10026
	0.476971	1.88384	2.13017		0.94608
	1.43272	0.899207	1.69007		0.604408
	1.34674	1.65884	1.38968		1.21542
	1.14182	1.60726	1.5796		1.48165
	1.03424	1.54783	1.53651		1.03049
	1.8224	1.30067	1.51395		1.27743
	0.957698	1.73169	1.5158		1.56876
	1.19392	1.35749	1.4738		0.818608
	1.01261	2.26763	1.99087		1.20722
	1.51349	1.80824	0.991484		1.41424
	0.91059	0.980973	1.35022		0.693604
	0.773242	0.359056	1.66197		1.74574
	0.581414	1.50768	1.40846		1.03659
	0.668407	1.26415	1.80191		0.919477
	0.971379	0.971075	1.71332		1.47948
	1.33856	1.74613	0.864708		0.84765
	0.819535	1.82392	1.35292		0.872777
	1.2824	1.37671	0.834068		0.621972
	1.27086	1.50805	1.18471		1.31454
	0.786777	2.1679	0.938931		1.01096
	1.17556	1.65088	1.10915		0.587617
	0.784047	1.41409	1.02904		0.703601
	1.11613	1.74415	1.27879		0.990307
	0.554457	0.959278	1.84882		1.16384
	0.794437	1.03295	1.70281		1.2202
	1.26377	1.70262	0.916336		1.21839
	1.22453	1.23235	0.881782		1.88689
	0.502535	1.06702	1.71965		1.32039
	0.501331	1.57498	1.58583		0.600547
	0.4701	1.60929	0.871594		0.703601
	0.851241	2.06949	1.17653		0.669859
	0.604408	1.57791	1.30236		1.12631
	1.09439	1.05435	1.47085		1.59703
	1.25088	1.93484	0.991257		1.23914
	1.09519	2.66306	0.936824		1.45387
	1.27174	1.52931	1.44355		0.846811
	0.856935	1.61574	1.28156		1.11181
	0.973599	1.51599	1.03819		1.9155
	0.662007	0.616299	1.49567		1.15665
	0.748876	1.88934	1.32606		1.25975
	0.78293	2.03183	1.97667		1.06396
	0.973952	1.42094	1.20441		1.09277
	0.708649	1.88028	0.949073		1.04772
	1.09509	1.27257	1.50971		0.836948
	1.16699	1.13468	1.25337		0.818519
	1.23965	1.38616	0.781609		1.57143
	0.984616	1.29881	1.55577		1.38114
	1.67051	1.15325	1.39562		0.713924
	0.927946	1.16504	1.28455		0.726501
	0.76237	1.33506	1.58853		1.06192
	0.97334	0.929514	0.653904		1.09576
	1.43642	1.15	0.890107		1.64667
	0.883825	1.42186	1.24021		1.21283
	1.89484	1.60564	1.37129		1.76339
	0.884932	1.78408	1.25529		1.28593
	1.28266	1.80181	1.64391		1.46303
	0.78466	0.825315	1.88412		1.02121
	0.812419	0.98222	1.30816		2.63828
	0.556088	0.774599	1.13341		1.15485
	0.405512	2.07565	1.69189		1.46645
	0.903237	1.62053	1.42344		0.608945
	1.26552	1.59777	1.21917		0.868186
	0.956382	1.77521	1.12766		1.34489
	0.819929	1.29593	1.11494		0.722398
	1.00107	0.877846	1.79018		0.98365
	0.917493	1.92372	1.3845		1.47242
	0.722122	2.25401	0.818608		1.29555
	0.543323	1.13207	1.52221		1.29607
	1.03924	1.32389	1.37935		1.3485
	1.13091	1.99894	1.64473		0.766207
	0.820766	1.20138	0.97681		0.97958
	0.623303	1.35657	0.669789		1.98987
	0.62186	1.56875	1.16931		0.740855
	0.568396	1.61061	1.33479		1.03055
	0.935066	1.72594	0.858522		0.78466
	1.24412	1.32858	1.12372		1.24048
	1.01719	1.68643	1.36628		0.876532
	0.852709	2.20522	1.2262		0.852209
	1.10515	1.48795	0.405512		0.997593
	0.877289	1.80993	1.31721		0.664907
	0.666887	1.47437	1.27463		1.1704
	0.999895	2.81545	1.11538		0.854993
	0.792106	2.55154	1.63551		1.43643
	0.773079	1.27229	1.50486		0.443609
	0.669195	2.01534	1.50356		0.639474
	0.536712	0.562535	1.70987		1.65675
	0.642759	2.62187	0.749245		1.19701
	0.873615	1.82403	1.73779		1.51943
	0.937301	1.73273	2.30435		0.623375
	0.739496	1.59649	1.1027		0.874586
	0.938849	1.17745	1.42184		1.53635
	0.86654	1.56814	1.79292		0.573582
	1.26945	1.75865	1.0632		0.78293
	1.21037	1.46767	1.17894		1.65694
	1.1081	1.54242	1.32146		1.34387
	1.34277	1.20837	2.21531		1.4327
	0.955992	1.9367	1.38472		1.69116
	0.685318	1.75878	2.02359		0.869186
	0.925173	1.82011	1.76823		1.446
	0.627496	1.52528	1.51456		1.18711
	1.26873	1.53705	1.89771		0.514169
	0.5314	1.42366	2.05375		1.10549
	0.766207	2.25666	1.25907		1.30957
	1.66244	1.55249	1.25561		0.359056
	0.858127	1.66171	1.20965		1.09744
	1.11709	1.31129	1.33396		0.764093
	1.81644	1.39466	1.70654		1.02008
	0.987702	1.39436	1.46913		1.40293
	0.687578	1.26567	1.72954		1.2822
	0.587275	1.59427	1.46777		1.36181
	1.41827	1.43292	1.04516		1.51379
	1.10685	1.23741	1.44357		0.916278
	1.19804	1.2245	1.66958		0.668846
	1.16243	0.924784	1.45247		0.865406
	0.993041	2.15682	1.77262		1.15138
	1.07253	1.3936	1.80557		1.30889
	1.33825	2.13682	1.35331		1.41607
	1.0996	1.29358	2.11041		0.936871
	1.31569	1.0435	2.03201		1.18087
	0.782812	0.639778	1.17125		1.10302
	1.06286	1.81029	0.886341		0.744741
	0.772786	1.51441	0.600547		1.85253
	0.703601	1.97313	1.57072		1.18857
	0.898851	1.90228	1.74932		1.07474
	1.25414	0.880325	1.48006		0.529313
	1.03498	1.51916	1.46886		0.968928
	0.443609	1.04697	1.25485		1.76629
	1.25005	1.53499	1.66481		0.920837
	1.05698	1.19651	1.84682		0.639778
	1.92857	0.55813	0.411032		1.37194
	0.821696	1.40556	1.35953		0.86047
	0.98131	1.64483	1.31116		0.740174
	0.753597	1.23533	0.999721		0.817404
	0.850302	1.76915	0.649907		0.520027
	0.914561	1.06549	1.94604		0.787692
	0.359056	2.02824	0.855465		0.802148
	0.696925	2.70134	1.17457		0.980978
	1.08119	1.33756	1.65007		1.19864
	0.87342	0.683731	1.22338		0.982909
	0.802629	1.50495	1.96271		1.12732
	1.51132	1.62973	1.11091		1.39532
	1.20216	1.02303	0.753731		0.789695
	0.946372	2.1692	1.71337		0.97507
	0.667133	1.36769	1.66157		0.780543
	0.721879	1.94047	0.993328		0.750392
	0.529698	1.42653	1.43583		0.850892
	0.621585	1.24856	0.691105		1.02016
	1.54074	1.87872	1.54409		0.867438
	1.25749	1.59201	0.629185		0.881403
	0.902985	0.603781	1.52427		1.71205
	1.17446	1.57726	1.32183		0.747667
	1.00469	1.57362	1.48721		0.834517
	0.83812	1.86162	0.649907		0.550703
	0.812693	1.34659	1.32221		1.3601
	0.691843	1.73965	1.1108		0.726656
	0.812568	0.742728	1.4613		0.64124
	1.17592	2.25603	1.43001		0.642759
	1.1595	0.702823	1.13666		0.71724
	1.15279	1.84725	1.3882		1.62635
	1.32161	1.13048	0.944977		0.693604
	1.13934	1.79335	1.23609		0.976565
	1.19402	1.93168	0.904837		1.17444
	0.763135	1.62085	2.21115		1.33626
	0.990506	1.74435	0.967958		0.64124
	0.904462	1.58446	1.45785		1.07476
	1.06074	0.451534	0.932759		0.674948
	0.627055	1.5337	1.38051		1.09852
	1.29174	1.19402	1.55376		1.78227
	0.59102	1.0458	1.34605		1.01328
	1.12866	2.30464	1.3669		1.20187
	0.796421	1.35734	1.29406		0.595236
	1.31755	1.45349	2.09696		0.750392
	0.680204	0.791656	1.22287		0.928837
	0.48256	2.40791	0.991562		0.918725
	0.910602	1.29185	1.31798		1.50012
	0.720641	1.59081	1.07187		1.04606
	1.55674	1.32085	1.58705		1.81401
	0.497318	1.79837	1.57035		1.27865
	0.790491	1.35722	2.25771		1.14264
	0.73607	1.5225	1.63807		1.55402
	0.713405	0.870628	1.14188		0.711807
	0.812561	0.443609	1.25164		1.08472
	0.926164	1.8323	1.21159		1.25122
	1.28542	0.359056	1.54404		0.860464
	0.80498	2.01209	1.61514		0.758228
	1.18133	0.767854	1.57653		1.48872
	1.01516	0.763135	1.24981		0.526617
	0.658592	1.3194	1.79131		0.877193
	1.91687	0.788934	1.29515		1.09115
	0.582347	1.31951	1.36962		1.12092
	1.21803	1.25411	1.31165		1.51684
	0.962838	1.06144	0.869243		0.710039
	1.85008	0.828816	0.411032		0.835327
	1.17108	1.72281	1.73952		0.405512
	1.07404	2.03855	0.797721		1.45768
	1.06549	2.09828	1.34625		0.359056
	0.866098	0.8602	1.96379		0.747263
	0.822517	1.15998	1.62063		1.08211
	0.844871	1.06093	1.65652		2.08165
	1.17464	1.18791	1.3186		0.545722
	1.55486	1.0771	1.61297		1.28333
	0.780487	1.74632	2.00699		0.581414
	1.01484	1.97243	1.84601		1.62201
	0.664907	2.25884	0.766207		1.32023
	0.724722	1.48606	1.44814		1.80046
	1.38678	1.24692	1.68931		1.49503
	1.55236	1.34566	1.04153		1.34553
	0.86395	1.1964	1.4675		1.21533
	0.529313	2.5173	1.59925		0.750222
	0.752648	1.56143	1.42182		0.501938
	1.31037	1.90018	1.81665		1.07581
	1.16775	1.64087	1.04126		0.832679
	1.01476	1.74272	1.17408		1.56581
	0.869195	1.99625	1.05785		0.672276
	1.00804	2.14353	1.3583		1.08084
	0.713506	2.29796	2.17357		0.781293
	0.599332	0.501938	1.23902		1.30288
	0.90039	1.50539	1.07382		1.8579
	2.0833	0.874921	1.07862		1.21708
	1.07453	1.69874	1.88777		0.97122
	1.15843	1.01371	1.37749		1.19899
	0.501938	1.06285	1.35896		1.18296
	0.695543	1.19144	0.806947		1.13483
	1.2175	1.46308	1.57515		2.59417
	0.713924	0.4701	1.0988		0.632936
	0.864696	2.15224	1.76078		1.01067
	0.588366	1.00677	1.12791		1.51297
	1.32313	1.42663	0.681059		1.0007
	0.883291	1.29468	1.224		1.50272
	0.65761	1.45363	0.681059		1.3318
	1.42733	2.04692	0.763677		0.898156
	1.1756	1.16204	1.9478		1.10656
	1.2974	1.49337	1.83454		0.770082
	1.24638	1.56185	1.22224		0.981064
	0.833671	1.08281	1.32614		1.46711
	0.926631	0.966972	1.14349		0.68209
	0.630125	2.18347	1.8946		0.675842
	0.748876	1.39873	1.18296		0.774032
	0.911465	1.04051	1.22128		1.13268
	1.04487	1.10528	1.3729		1.00774
	0.965683	1.64729	1.50796		1.42288
	0.586236	1.43034	1.5423		1.09811
	1.31101	1.23165	1.27402		1.19885
	1.1921	1.52518	1.8524		1.3475
	0.593064	1.19147	0.836683		0.979418
	0.9947	1.54404	1.1787		0.821138
	1.21937	1.18211	1.81209		0.98872
	1.70243	1.06167	1.11398		1.56356
	2.11307	2.15164	1.19865		1.5329
	0.808561	0.990006	1.33964		0.756915
	0.929272	0.838819	0.958281		1.13501
	0.639778	1.37995	1.81626		1.0746
	0.829401	1.17802	1.40294		0.405512
	0.834517	1.56521	2.03696		0.897939
	0.808297	1.08019	1.22591		1.02596
	0.773922	1.24676	1.99493		1.24556
	1.05631	0.789663	1.4396		0.726243
	1.01356	0.936632	1.72397		1.21892
	0.853145	0.952117	1.38105		0.831172
	0.894904	1.57278	1.85867		1.30792
	1.36817	1.77709	0.929272		1.43401
	1.02886	0.763423	0.907227		0.73995
	0.921677	1.38616	1.00157		0.526617
	1.01234	1.78196	1.11038		1.31072
	0.615111	2.02812	1.55931		1.33155
	1.27436	1.57621	1.94212		1.20471
	1.77988	1.75512	1.7204		1.10837
	0.790491	2.3197	1.74315		1.56976
	1.21904	0.848511	1.33083		0.692359
	1.80985	0.987108	0.96847		1.88729
	0.742348	0.576174	0.993112		1.09442
	1.24837	1.38082	1.35109		0.59102
	1.11289	1.35085	1.39879		0.671684
	1.49348	1.16142	1.65306		0.729564
	1.03753	1.80557	1.32138		0.501331
	1.37864	1.09724	0.762585		1.19206
	1.27387	1.21287	0.870793		1.39264
	1.15682	1.76535	1.54564		1.13484
	1.27238	1.94171	1.15072		1.03796
	1.14509	1.02444	1.33748		1.08782
	0.689394	1.25956	0.942546		0.635442
	0.588612	0.937984	0.711735		1.32392
	1.32929	1.06721	1.67508		1.42362
	0.674948	1.81607	0.359056		1.74516
	0.831838	2.04525	1.75577		1.42799
	0.650325	0.888724	1.72059		1.14122
	0.819425	1.06762	0.773079		1.28225
	1.38833	1.62789	1.17116		1.34832
	0.778054	1.65212	1.93678		0.68209
	1.03789	1.10628	1.31033		0.857513
	0.703593	1.58137	1.93718		0.99468
	0.684177	0.581176	0.82226		1.48395
	1.43178	1.87618	1.04307		1.23511
	1.36963	1.69	1.3734		1.09253
	0.658592	0.907291	1.32902		1.42841
	0.982363	1.60711	1.44293		0.64124
	0.540452	1.51597	1.46979		1.15585
	0.782174	1.45071	1.18091		1.4341
	1.53816	0.914829	0.722687		1.001
	1.32596	1.21158	1.52667		1.5692
	0.773471	1.386	1.07138		0.685789
	0.885757	1.52154	0.833612		1.17882
	1.15778	1.35277	1.80503		1.69707
	0.759202	0.786952	0.522311		0.682163
	0.99064	1.50716	2.00261		1.23651
	0.914214	0.830979	1.19672		1.17795
	1.21674	2.0563	1.14338		0.84379
	0.793283	1.82424	1.66452		0.856522
	1.27442	0.9775	0.85086		0.673763
	1.3247	1.73383	0.837581		1.3153
	1.35953	1.12898	1.50528		0.709861
	0.923243	1.25675	0.708649		0.801886
	0.675948	1.40278	1.57934		1.08957
	0.70045	1.94244	0.949524		1.09988
	1.05453	1.10196	1.8687		1.13339
	0.899735	1.39597	1.1248		0.782543
	0.902731	1.22265	1.06941		1.34469
	0.784765	1.05884	1.08716		1.23396
	0.936309	1.69514	1.51853		1.1887
	0.703579	1.99281	0.543323		1.00021
	1.36045	1.57519	1.30748		1.1158
	1.19992	0.81544	1.03381		1.07523
	0.678996	0.92354	0.847768		1.51736
	0.943188	1.77234	1.37084		1.05869
	1.27293	1.64701	1.09584		1.43203
	0.913661	1.72413	0.411032		1.02566
	1.11137	1.51187	1.73062		0.791498
	1.23801	1.96837	0.806064		1.4708
	0.709195	1.42529	1.35132		1.06794
	1.38296	1.55762	1.50827		1.10194
	0.806584	1.11239	1.38626		1.28016
	1.09575	1.71955	1.78358		1.66583
	1.13649	0.941484	1.59351		0.831745
	0.562535	1.90017	1.00946		1.49463
	0.529313	2.02829	1.64296		1.39944
	1.0579	0.723436	1.01679		0.759633
	0.983391	1.89522	1.71005		1.61072
	0.987267	1.46444	1.12915		1.12662
	0.901629	2.31671	1.70178		1.05745
	1.05631	3.44642	1.09153		1.86352
	0.451534	2.39034	1.19857		1.00174
	1.33298	1.22029	1.26905		1.00042
	1.19529	1.47448	0.411032		0.974254
	1.09821	0.842739	0.799294		1.22831
	0.868223	1.92601	2.4074		0.585678
	0.742728	1.3066	1.60716		1.95251
	1.39875	1.91871	1.06114		1.96968
	1.00938	1.90353	2.23752		0.781609
	1.2115	0.529313	2.00175		1.67779
	0.744005	0.946856	1.5961		1.75845
	1.37693	1.12013	1.67039		1.24633
	0.715375	1.29872	1.89628		1.20498
	1.24206	1.76943	1.70353		0.949736
	0.82226	1.75225	1.07752		0.652196
	1.31392	1.47078	1.47742		1.32146
	0.80325	1.02334	1.5955		0.556088
	1.62019	1.56671	1.25361		1.05763
	0.922623	1.47807	1.05232		1.14408
	0.946598	0.576629	1.62194		1.57438
	0.683671	1.75497	1.07321		1.16784
	0.750172	1.62005	1.62922		1.77011
	0.776654	1.41643	2.2959		1.53809
	0.855443	1.32726	1.31112		0.622596
	0.451534	1.05381	2.31836		0.948871
	0.66999	1.33408	1.86041		0.957444
	1.09598	1.09054	1.56425		1.01346
	1.00868	1.37698	0.93336		1.08268
	1.45949	1.49948	1.02423		0.739392
	0.849939	1.53396	1.58744		1.66649
	0.913541	1.34642	1.251		0.535262
	0.970973	1.28061	1.22519		0.793255
	1.30307	1.78953	1.13814		1.47858
	1.03679	1.1742	0.91785		0.883739
	0.672225	0.761874	0.765188		1.33474
	1.00599	1.75213	1.32403		1.90101
	0.94803	1.08773	1.42314		1.40763
	0.730113	1.2953	1.06449
	0.964971	1.00545	1.17318
	1.03229	1.57109	0.735168
	0.924841	1.28275	1.13005
	0.837593	1.30859	0.907079
	1.02402	1.53876	2.20847
	1.27065	2.06125	0.905143
	0.753597	1.76247	1.83499
	0.772498	1.99427	1.02819
	0.967783	1.09141	0.948586
	0.812918	1.08732	1.7943
	0.831971	1.08071	0.816292
	0.620664	1.03633	1.15794
	0.809466	1.36861	1.42203
	1.02651	1.05835	0.703601
	1.05244	1.93719	1.46432
	1.22823	2.08351	1.45098
	0.769244	1.71512	1.51534
	1.13238	1.15217	0.908632
	0.69417	1.30953	1.69051
	1.12783	0.769991	0.833184
	1.02504	1.67643	1.81717
	1.20334	1.60064	2.26194
	0.842852	1.81157	0.703601
	0.529313	0.952835	0.924964
	1.40319	2.37199	0.64643
	0.879477	1.45405	1.23885
	1.04821	1.18211	1.16254
	0.813642	1.20086	1.44348
	1.01477	1.02238	1.6465
	1.23013	1.72585	1.84628
	0.735577	1.04794	1.04689
	1.13069	1.03002	0.985368
	1.63453	2.0948	0.581414
	1.10739	1.21778	0.804657
	0.95567	0.736503	1.23725
	1.28844	1.68341	1.40851
	0.540452	1.16785	1.03924
	1.17512	1.31677	0.765092
	1.22225	1.44316	1.18134
	0.556088	1.3662	1.41936
	1.48276	0.99494	1.17857
	0.738773	1.04821	0.650325
	0.971814	1.02764	1.22589
	0.703579	1.59471	1.24799
	1.29188	1.1141	1.07697
	1.3384	1.24785	1.23018
	0.855946	2.11854	1.6225
	0.604408	2.48961	1.20266
	1.25326	1.20863	1.41298
	1.05462	1.52956	1.18322
	0.790261	0.536712	0.818608
	1.15499	0.974997	1.003
	1.04153	1.40404	1.67723
	0.736734	1.30493	1.32606
	1.19118	1.89927	1.24548
	0.793255	1.5898	2.32243
	1.10866	2.34565	1.64678
	1.21004	1.5772	1.48659
	1.28199	1.6183	1.77601
	0.989512	1.44466	2.16164
	0.955068	1.20672	2.70372
	0.936305	1.09639	0.877751
	0.957593	1.37269	1.74452
	1.28066	2.08757	1.12117
	0.986982	1.36904	1.57765
	1.1281	1.21588	1.67148
	0.922113	1.24285	1.45399
	1.39998	2.02039	1.59806
	1.20866	1.39681	1.04484
	1.09671	1.57906	1.07638
	0.780852	1.10702	0.808116
	1.09474	1.49807	0.750392
	1.66299	2.10852	1.08585
	0.888761	1.50377	1.17881
	1.66158	1.86683	1.16554
	0.88147	1.93078	1.45839
	1.12246	1.5041	0.952815
	0.4701	1.49875	1.06549
	0.990307	1.32613	0.658521
	1.9542	2.23984	1.35139
	1.8431	1.50235	1.46503
	1.04383	1.6824	1.19817
	0.907503	1.33089	1.21881
	0.870793	1.31692	2.05402
	2.13068	1.45379	0.801949
	0.683661	1.83007	1.55755
	0.661049	1.59404	1.51036
	0.359056	2.045	1.27641
	0.405512	0.715514	1.36964
		1.50548	0.99068
		1.39532	1.58451
		1.55297	0.926402
		1.35419	1.22776
		2.94526	1.61556
		1.35304	1.15632
		1.31155	0.593064
		0.795601	1.16937
		1.48491	0.913804
		0.951657	1.13835
		1.69856	1.15455
		1.45243	0.629185
		1.15586	1.09327
		0.405512	1.56134
		1.77903	0.535262
		1.34741	1.44228
		2.02154	1.59983
		1.71452	0.93301
		1.77409	1.09502
		1.40136	1.25089
		0.94745	2.32761
		2.5275	1.27999
		1.57159	1.09293
		1.53889	1.71637
		2.30575	0.722924
		2.18383	1.18608
		1.85766	0.816385
		1.24934	1.30227
		1.52782	1.73195
		1.93984	1.0889
		1.60991	1.2369
		1.38281	0.750189
		0.694878	1.15587
		1.15043	1.79124
		2.53787	1.74599
		0.405512	1.56099
		1.47681	1.03136
		2.02189	1.64868
		1.70413	1.08625
		1.21629	1.52726
		2.31416	1.79302
		1.06624	1.48144
		0.951785	1.24067
		1.48714	0.925867
		1.33277	1.06316
		1.74798	1.02568
		1.72655	1.88247
		2.45787	1.32895
		1.26941	1.21671
		1.5251	0.971801
		1.32824	0.558262
		1.45688	1.60949
		1.11184	1.39857
		2.02818	1.54268
		0.899684	1.86903
		2.16913	2.39808
		2.34927
		0.536712
		1.63144
		1.32146
		1.89068
		1.3673
		1.08275
		1.93822
		1.27961
		1.92156
		1.15248
		1.6286
		2.56171
		1.13314
		1.69997
		1.07134
		1.15757
		1.10904
		1.05333
		1.31093
		1.58618
		1.28588
		1.499
		1.86788
		0.978519
		1.51128
		0.804164
		1.31888
		1.18324
		1.24333
		1.33837
		0.754187
		1.33172
		1.10051
		1.72327
		1.61289
		1.84593
		1.03424
		1.54289
		2.33673
		1.43404
		0.727105
		1.95206
		1.1697
		1.03576
		1.16386
		1.97992
		1.7157
		1.07067
		1.61698
		1.93235
		1.62727
		1.31317
		1.43821
		1.62573
		1.4701
		1.37296
		1.35896
		1.44473
		1.83473
		1.7415
		1.52422
		1.72692
		1.84202
		1.14551
		0.359056
		1.60338
		1.59216
		1.43605
		1.43414
		0.806769
		2.21455
		1.78986
		2.08946
		1.24053
		1.1413
		1.36289
		2.09856
		1.84695
		1.90199
		1.71088
		1.33823
		0.991257
		0.894975
		1.09238
		1.19104
		1.85765
		0.996548
		1.00875
		1.08197
		1.4765
		1.26848
		1.18333
		1.11718
		1.01121
		1.50707
		1.21528
		0.909978
		0.734902
		0.968576
		0.759878
		1.13845
		1.61144
		1.22215
		1.23933
		1.8887
		1.11582
		0.898658
		1.25887
		1.46709
		1.3754
		1.83501
		1.33102
		1.872
		1.73444
		1.8285
		0.902304
		1.95822
		1.69872
		1.64164
		2.99108
		2.03417
		1.41399
		1.47983
		2.07363
		1.97706
		1.79227
		2.11941
		1.80622
		1.75521
		1.85732
		0.982816
		1.07039
		2.18597
		1.16338
		1.76117
		1.59915
		1.7063
		1.80139
		0.765489
		1.81528
		2.5922
		1.91046
		1.7023
		1.76514
		1.17388
		1.97926
		1.6451
		1.06158
		1.29528
		1.4596
		2.39571
		0.556602
		1.10557
		1.88449
		2.09912
		1.37891
		1.46413
		1.77043
		1.55181
		1.03656
		1.3769
		1.28015
		1.19636
		1.94546
		1.25859
		1.49497
		1.14781
		1.12169
		1.33123
		1.30781
		1.22838
		1.12945
		1.82563
		1.49267
		1.29467
		1.17835
		1.3242
		1.79756
		1.14946
		1.39105
		2.28911
		1.39172
		0.672276
		2.36792
		1.96287
		0.642759
		1.81271
		1.44946
		1.36543
		1.65776
		1.36515
		1.21138
		1.17736
		1.55856
		1.55248
		1.28237
		1.76228
		1.59799
		2.11149
		1.05085
		2.3681
		1.77046
		1.23084
		1.92884
		0.943305
		2.66269
		0.795121
		1.22046
		3.41705
		1.64848
		1.57554
		0.901629
		1.61068
		0.947157
		0.798865
		2.16562
		1.17063
		1.14315
		1.33238
		2.75183
		1.41387
		1.18911
		2.85144
		0.613438
		0.763135
		1.79357
		2.61817
		1.77642
		1.32647
		0.715394
		1.62751
		2.69088
		1.49717
		1.78406
		2.35661
		0.581176
		2.01238
		2.22397
		0.938299
		1.71804
		1.33033
		1.06309
		0.667638
		1.16846
		0.861876
		1.052
		1.37364
		1.54069
		0.967705
		0.853399
		0.801063
		2.38577
		0.587617
		0.981229
		1.5538
		1.65049
		0.826074
		1.01689
		1.20883
		1.40733
		0.639096
		0.634771
		1.45675
		1.25591
		1.68391
		1.40619
		1.19815
		0.681059
		2.14031
		1.13867
		1.06208
		0.62186
		2.00722
		0.753491
		1.36367
		0.79323
		0.798141
		0.527271
		1.18162
		1.14546
		1.35305
		0.632765
		0.991751
		0.964514
		0.94557
		0.647829
		1.32543
		1.67909
		0.910353
		1.26162
		0.411032
		1.08176
		1.35118
		1.01056
		1.4548
		1.45364
		0.930878
		0.852423
		0.866867
		1.52612
		1.71787
		1.30606
		1.57017
		1.63201
		0.696875
		1.83447
		1.70773
		0.616477
		2.12584
		0.359056
		0.522311
		1.4811
		0.740792
		0.789596
		1.10366
		1.46332
		1.33263
		2.03761
		1.75161
		0.942377
		1.13144
		1.16193
		1.51231
		0.649907
		1.14764
		0.739392
		0.848761
		1.68699
		1.30799
		1.76877
		0.689555
[truncated: 1,195 more rows]

## Sheet: Fig. sup. 3D
10 minute volume - phase 2
		Control	PA(11)	VAN(20)	PA + VAN(10)	PA + VAN(20)
		1.59876	1.25982	2.16356	2.04705	0.773939
		1.68436	1.79546	2.05836	1.34229	1.30963
		2.51856	1.83988	1.88124	1.05355	1.05019
		1.56184	1.5987	1.89444	1.45622	1.5761
		2.187	1.98579	2.71335	1.39739	1.30504
		1.82399	1.48324	1.60106	1.18027	0.768805
		1.50862	1.53873	1.47111	1.35654	1.24505
		1.44137	1.41309	1.54945	1.96035	0.980126
		2.21222	1.07977	1.47212	1.72722	1.03442
		1.24757	1.82284	1.69729	1.00944	1.30702
		1.73829	1.3044	1.91834	1.35537	1.2608
		2.08295	0.918959	1.67655	1.18417	1.59349
		1.36648	1.85548	2.25312	1.20886	2.1447
		1.67709	1.23751	1.90064	1.21971	1.25307
		1.94235	1.15503	1.36716	0.763828	1.58469
		1.36257	1.15153	1.05276	1.43374	1.62253
		1.45166	1.28631	1.54496	1.16263	1.32779
		1.50039	1.59698	2.48728	0.987267	1.07385
		2.00774	1.15864	1.84766	1.16492	1.29688
		1.01604	1.14197	1.88138	0.959869	1.18354
		1.66188	1.81295	1.54839	0.823003	2.01123
		1.38334	2.64714	2.01304	1.75007	1.49293
		1.74333	1.0777	1.7949	1.52735	1.04979
		2.17523	1.5315	2.1143	1.43534	1.23876
		1.57591	2.07616	2.23603	1.84463	0.900796
		2.14472	1.45829	1.98126	1.78469	1.19017
		1.66994	0.981036	1.89599	1.42297	1.22781
		1.79663	1.55614	2.16026	1.64613	1.13709
		1.58138	2.30224	2.59533	0.840042	1.22138
		1.78984	1.37649	1.91965	1.45483	0.72241
		1.47674	1.65386	1.72346	0.884854	1.00018
		1.97095	1.36252	2.50674	0.775864	1.17841
		1.39401	1.46925	2.5001	1.1112	1.70948
		1.92411	1.60559	0.771655	1.09467	2.49364
		1.59579	1.26448	2.14757	1.25434	1.84228
		2.15524	1.45472	1.61002	1.49511	1.04277
		1.77092	2.22485	2.26095	0.928392	1.46742
		2.3293	1.82112	1.5243	1.16069	0.801921
		1.11177	2.1538	1.7502	1.59395	0.964323
		1.95205	1.77143	2.73182	1.6345	0.672512
		1.41335	1.65559	1.96547	1.00617	1.48403
		1.31643	1.28023	2.25803	0.927164	1.83798
		1.47224	1.95589	2.86081	1.9593	1.4345
		1.48484	1.34232	2.44201	1.55229	0.796421
		1.30799	2.16271	0.720971	1.51231	1.20595
		1.66208	1.25649	2.45099	1.23371	2.24569
		2.00731	2.60035	1.7857	1.40917	1.32812
		1.65315	1.47025	1.93404	1.06203	1.93642
		1.8126	1.36925	1.85745	1.30784	1.67454
		2.40566	1.3628	1.62501	1.92711	1.35257
		1.28843	1.9509	2.7352	1.69384	1.18322
		2.37994	1.37473	2.11835	0.99764	1.66553
		1.71611	1.67395	2.06485	0.713782	0.869362
		1.46367	1.358	2.03487	1.25616	1.35498
		2.48253	1.21533	2.52805	1.00349	1.23276
		1.68116	1.53696	2.7167	0.884854	0.696482
		2.85618	1.79641	1.45289	1.3998	0.944076
		3.07342	1.29186	1.26221	1.25657	1.42661
		1.39102	1.8085	1.51791	1.01222	1.06751
		1.96729	1.87398	2.35775	1.25611	1.38882
		1.76935	1.85027	1.58691	0.828864	0.960584
		2.18411	1.83432	1.85281	1.50003	0.763135
		2.23373	1.06075	2.16296	1.53835	1.16616
		2.88244	0.791498	3.19353	0.635608	1.33075
		2.34144	1.51124	2.07731	1.5527	0.866683
		1.68692	0.945425	2.54438	1.42662	1.35164
		1.71736	1.97711	2.03179	1.18302	0.811692
		1.08899	1.20979	1.89561	0.781609	0.952662
		1.58563	1.49964	1.33533	0.969292	1.30248
		1.25082	1.98767	2.15042	1.15882	1.72165
		1.53917	1.65409	1.36217	1.52673	1.25969
		2.23302	0.89922	1.79361	0.888724	1.67137
		2.0016	1.07194	2.23591	1.19605	0.888575
		2.05718	1.81511	1.74636	1.0429	0.978774
		1.91677	2.10762	1.79466	0.866403	1.54988
		2.242	1.31786	2.41157	1.05485	1.25917
		3.55488	2.62795	2.65082	1.97738	1.26248
		1.40819	1.67747	2.1883	1.95725	1.16432
		1.80186	1.54877	1.99876	1.13739	1.49263
		1.98815	0.359056	1.82592	1.203	1.15908
		2.17786	1.71787	2.43969	1.16509	1.30659
		1.62262	1.45681	2.49368	2.35862	1.9948
		1.55734	1.57279	1.68538	1.10308	1.34985
		3.30067	1.86148	2.15889	1.08543	1.74702
		1.97924	1.16289	2.33497	0.814647	2.41855
		1.64925	2.11651	1.96907	1.04245	2.95498
		2.72749	1.99287	1.25964	1.31318	1.0233
		1.6915	1.31401	1.32349	0.794852	1.08907
		1.27443	1.76413	1.90796	0.746605	0.76257
		1.39447	2.41426	1.98054	1.17506	0.888333
		1.90468	1.35154	3.69007	1.47754	1.85789
		2.11542	0.936395	2.44656	2.29275	1.69251
		1.70819	0.847921	2.39825	1.75209	1.15341
		1.73392	1.48121	2.46721	1.21381	1.18068
		1.43405	1.01484	3.30575	1.10302	1.1285
		2.43886	0.921112	1.32841	1.43423	1.33041
		2.02424	1.19114	0.934228	1.56503	1.26677
		3.24767	1.17993	1.67923	0.731001	1.59816
		1.93691	1.73997	1.92104	1.71185	0.815123
		2.56843	1.94421	2.05507	1.06838	1.47348
		2.09237	1.80625	1.60548	0.906214	0.991939
		1.93951	1.68916	2.07609	1.41139	0.587202
		2.73445	1.45734	2.90872	1.41543	1.32329
		1.49613	1.65626	2.51784	1.31656	1.11141
		1.72095	2.30572	1.87502	0.936632	2.1268
		1.55832	1.05131	1.56436	2.13906	1.61863
		2.97714	2.05535	1.81671	1.10275	0.861829
		2.43704	1.41857	1.61228	1.57662	1.74
		1.47617	1.04744	1.87947	1.50145	1.0855
		1.54898	1.86584	2.2889	1.21213	2.18945
		2.77899	1.91028	2.17721	1.13561	1.39069
		1.67233	1.06893	1.25159	1.30091	1.3075
		1.53648	1.06588	2.45963	1.81288	1.64485
		2.17443	1.41484	2.24077	1.26146	1.15954
		2.97677	1.77856	2.54819	0.770082	1.5203
		2.67641	0.931707	1.82023	0.886971	1.05425
		1.63108	1.81242	1.86032	1.02295	1.34855
		1.93418	1.86269	2.46255	0.929797	0.973952
		1.1141	1.41709	0.903423	0.89922	2.12464
		1.7745	1.70482	2.04892	1.42212	1.82217
		2.05185	1.82509	2.10808	1.56423	0.937655
		1.22694	1.37862	1.94126	1.47567	1.27695
		1.38816	0.815404	3.70881	1.80335	1.29506
		2.27393	1.77312	2.33789	1.62739	1.09753
		2.5517	1.49492	2.49714	1.22208	0.941163
		1.42918	1.65212	2.26984	1.08206	1.27332
		2.49264	0.91674	2.21893	1.08268	2.64085
		1.61007	1.65128	1.87937	0.773079	1.45246
		2.58029	1.43197	1.56557	1.62178	2.38808
		1.41579	1.31557	1.94253	0.848761	2.03209
		1.6365	1.75426	1.39978	1.2792	1.07282
		1.364	1.06406	2.68511	0.976888	1.38004
		1.76018	1.58178	2.64055	1.06549	1.55601
		1.95029	1.20055	2.09152	0.604408	1.07967
		2.2334	2.36758	2.33897	1.55724	0.845891
		2.34789	1.27404	2.19563	1.16863	0.929964
		1.34873	1.36493	3.56988	1.75312	2.00521
		1.77222	1.35462	1.78683	1.25317	1.56778
		1.35701	2.01525	2.07093	0.973599	1.32461
		1.25036	1.41116	1.93927	0.821664	1.49873
		1.30802	1.04039	2.07771	1.35858	1.09693
		2.02635	2.23273	2.28982	0.801666	2.07004
		1.14358	1.88653	2.15606	1.77465	2.50013
		1.94195	1.43839	2.48532	1.18292	1.53281
		2.24991	1.30822	2.25654	0.983478	1.25376
		2.73309	1.34472	2.21266	0.708649	1.50085
		1.23675	1.42432	1.91162	0.873569	0.810253
		1.167	0.957513	2.97212	1.11591	0.556432
		2.20219	1.44312	2.21847	0.932748	0.905576
		1.45223	1.33411	1.51187	1.06549	1.32414
		2.04536	1.53449	1.12893	0.922569	2.19836
		1.44911	1.18531	2.11182	1.12963	1.07786
		1.8116	1.95115	3.47429	0.685789	1.25272
		2.31212	0.687283	1.41389	0.920849	1.53776
		0.860542	1.11051	1.78295	0.676365	0.883291
		2.82483	1.0138	1.31196	0.981822	0.639778
		1.03045	1.35375	1.72919	0.928073	1.42604
		1.4472	1.33977	2.22718	2.28654	1.34989
		1.46712	1.99156	1.70573	1.39418	1.11009
		1.42813	0.796332	2.60834	1.85381	1.03674
		2.37289	1.5736	1.78187	1.33926	1.26615
		1.72417	1.77574	2.60165	1.08878	0.784909
		1.36774	1.397	2.03876	1.4768	0.969255
		1.6992	1.7141	1.73188	1.33895	1.38969
		1.42175	1.23182	2.49993	1.5128	0.869586
		2.47514	1.7132	2.62587	1.09068	1.32242
		1.36542	1.86313	2.81825	1.32322	0.825566
		1.46886	3.23776	1.92819	1.19428	1.18446
		2.30847	1.65142	1.56132	1.32522	1.92596
		1.66686	1.5465	1.46524	1.9161	1.0895
		1.57906	1.79081	2.78661	1.32508	1.81399
		3.17683	1.47866	1.60525	1.30321	0.904604
		1.48564	1.28726	2.32266	1.33093	1.66187
		2.11649	1.61233	1.8624	0.556088	0.973854
		1.52557	1.62434	2.66929	0.682465	1.35092
		2.143	1.84882	1.31117	0.936305	1.30242
		2.127	1.78386	2.0444	1.1929	1.97804
		1.68172	1.74584	1.59372	0.809181	0.937453
		1.48827	1.56533	1.04005	1.35527	1.22816
		1.66411	1.06885	2.97181	1.15243	1.15552
		1.63148	1.46578	1.57302	1.50969	1.16413
		1.82571	1.21938	0.824445	1.37468	1.26816
		0.927137	0.891309	1.93322	0.501938	1.12502
		2.46117	1.18569	2.12627	0.910786	2.01857
		2.14211	1.19413	2.67574	2.14747	1.02626
		1.77085	0.856952	2.82501	1.26846	1.74383
		2.16115	1.19289	2.24215	1.00207	1.10091
		1.68445	0.991414	2.94429	0.789892	1.48708
		2.22976	0.921779	4.08117	0.910898	1.54552
		1.78965	1.23074	2.21683		1.00571
		1.30987	2.4093	2.57217		0.871503
		2.06597	1.1183	2.55532		1.24192
		1.80884	1.34272	2.44744		1.36834
		1.52605	1.93672	1.72042		0.96789
		1.47213	1.28314	2.14431		0.73995
		1.29851	0.930992	3.02693		1.24437
		1.67056	0.748876	2.26258		1.64728
		2.82346	1.6281	1.81472		1.55806
		1.42262	1.96614	2.69318		2.69123
		1.28873	1.80333	1.74291		1.08662
		2.5009	1.13674	2.71842		1.42407
		1.7701	1.75347	2.29457		1.37402
		1.12484	1.73448	2.47832		1.26174
		1.17727	1.72504	3.1522		1.92142
		0.860034	0.705252	2.84937		1.84212
		2.85283	1.77808	2.70801		0.929114
		1.24282	2.00561	2.45171		1.35886
		1.96731	1.4433	2.08652		0.885918
		1.41039	2.17671	1.80172		1.84789
		1.84322	0.988841	1.95976		1.87805
		2.38775	1.00719	1.95745		1.33051
		2.19189	1.62737	2.13103		2.54295
		2.10592	1.21206	2.12743		1.1134
		1.62403	1.49522	1.87648		2.34621
		1.42841	1.46487	3.06959		1.77276
		2.44032	1.68017	2.87341		2.26301
		1.11868	1.63683	1.74859		1.63892
		1.36627	1.31124	2.85879		1.46377
		2.04882	1.76383	2.74128		1.35203
		3.006	1.84763	2.50682		1.64236
		2.11387	1.73564	1.89985		1.46788
		1.43159	1.3199	1.9118		1.63635
		1.94113	1.45745	3.20965		0.623327
		1.64351	1.31625	2.43418		1.77862
		2.15017	1.14435	1.55819		1.88798
		2.94602	1.84648	3.52469		1.1658
		1.39882	2.13482	2.41362		1.60685
		1.16477	1.4553	1.71575		1.22236
		2.22819	1.4448	1.95981		1.65516
		1.18847	1.80871	1.65515		0.780089
		2.02404	2.42946	2.29437		1.74124
		2.46087	1.90564	2.13565		1.0781
		0.97806	0.651477	2.17844		1.28246
		1.45584	1.61612	2.88557		2.02515
		1.68617	1.46015	2.26538		0.99542
		2.17567	0.652196	1.83902		1.53559
		0.901812	1.29945	2.31183		1.86486
		3.46085	1.46221	2.32283		1.14332
		0.875575	1.4393	2.67992		1.29124
		3.72354	1.60202	2.05419		1.24573
		2.86322	1.80191	2.6741		1.87161
		1.15014	1.69514	1.99668		1.24615
		1.67889	1.61329	3.38554		1.8764
		1.90932	1.48684	2.88416		1.66752
		1.92845	1.00452	2.59878		1.20003
		3.40123	1.94751	1.32052		1.25612
		1.55218	1.02075	1.62255		1.42084
		1.85875	1.28282	3.41468		0.803345
		2.06823	1.8839	2.89351		1.21466
		1.42038	1.2142	3.36625		1.36355
		2.02379	1.31238	2.18609		1.07814
		1.62391	1.12058	2.59156		0.922032
		1.71908	1.18218	2.12753		1.57671
		1.42827	0.630306	1.95956		1.41353
		2.04247	0.859245	1.6521		1.50585
		2.46663	1.3285	2.77706		1.12422
		1.55916	1.84472	1.74027		1.0228
		1.63148	2.51796	2.64822		2.0395
		1.45726	0.985087	2.10204		1.27982
		2.94134	1.45015	3.22624		1.84092
		1.9185	2.05497	1.72218		1.34901
		2.36659	1.53575	2.19018		1.44833
		2.21362	1.45644	2.41755		1.25683
		1.26826	1.57229	2.62822		1.34565
		1.0696	2.10473	2.6441		1.73973
		1.64437	1.42538	2.11568		0.879531
		1.47663	1.63993	3.16318		1.14843
		1.36648	1.29541	3.12616		1.43541
		1.19619	1.51566	3.33679		1.49101
		1.40446	1.60021	3.66219		1.11627
		1.29147	1.22788	2.50136		1.17648
		1.13404	1.71658	2.05795		1.65276
		1.35162	1.50268	3.26308		1.60781
		2.00433	2.36803	1.98717		1.40919
		1.70821	2.01893	2.20337		1.55583
		2.3051	2.38712	2.41953		1.96297
		5.12474	1.31114	1.62762		1.20278
		1.49921	1.13782	2.58245		1.16221
		1.383	1.71496	2.61854		1.2017
		3.04923	1.83309	2.22406		2.15624
		2.5374	1.7122	2.14201		1.77906
		1.8291	1.79685	1.29574		1.69214
		2.90765	1.30845	1.1293		0.81136
		2.93646	2.2489	2.092		1.63943
		1.4791	1.98087	1.71789		1.73843
		2.95966	1.43702	3.55865		1.65516
		1.81422	2.75722	1.65784		1.52692
		1.25498	2.57182	2.22139		2.20983
		1.1547	1.74988	3.60739		1.77003
		2.154	1.46165	2.39525		1.49984
		1.74844	1.08377	2.28551		1.85498
		1.9075	1.62042	2.12961		1.57045
		2.62908	1.89399	2.65816		1.62551
		2.08415	1.49389	2.9486		3.52754
		2.06679	1.96904	2.47471		1.34751
		1.99116	1.37918	1.7387		1.06432
		1.37514	1.39583	1.51734		1.36304
		1.8995	1.50358	1.78398		1.81355
		1.25229	1.10246	2.9711		1.55232
		1.28226	1.83774	3.54021		1.83928
		1.80528	1.73212	2.30899		1.50797
		1.76212	1.18296	2.57741		1.182
		1.30526	1.1836	0.695819		1.01951
		1.92031	1.4884	2.06067		1.42174
		1.76859	1.71333	1.85974		1.09554
		1.35023	1.14065	2.05718		1.4439
		1.47934	1.42672	2.61363		1.29883
		1.5821	1.22638	1.72432		1.67886
		1.46687	1.27821	2.44009		1.29353
		1.95171	2.46326	2.27066		0.965797
		1.99926	1.47171	2.51832		1.27485
		1.83154	1.49889	1.9718		1.10325
		1.31827	1.30602	2.50615		1.36287
		1.34311	1.49368	2.10547		1.55069
		2.08163	0.94514	2.22521		0.810026
		2.22654	0.89458	2.14477		1.08792
		1.42617	1.68853	2.10196		1.0842
		1.08261	0.837581	2.59641		2.331
		1.42959	1.10622	2.22778		2.01289
		1.74645	1.89785	2.55523		1.51607
		1.46817	1.15059	1.47451		1.92712
		1.58579	1.33566	2.10264		1.57242
		0.955895	1.73946	4.85405		1.5342
		2.42065	1.54811	2.02235		2.17644
		1.45494	1.42319	1.79546		1.66272
		2.45884	0.741716	5.08368		2.57912
		1.30222	1.35446	2.67639		1.29692
		1.57202	2.09008	3.84551		0.621972
		2.9421	1.83695	2.4563		1.20743
		2.37397	2.17302	3.95873		1.75519
		1.42022	1.38563	1.78184		0.921448
		1.0151	1.21077	1.46191		1.91735
		1.53223	1.12092	1.75782		1.34452
		2.5221	1.3115	2.98894		2.59192
		2.20116	1.12753	2.70296		1.94022
		1.18446	1.97352	2.70182		1.51026
		2.83861	1.24989	2.65917		1.93841
		1.2326	1.14994	2.29295		1.58973
		1.85845	1.068	2.54154		2.53109
		1.43957	1.06983	2.6458		1.29981
		1.79192	1.53384	2.64296		1.20499
		1.30885	1.28641	1.7075		1.5042
		1.09805	1.02807	2.661		1.34742
		1.1739	1.75088	2.01313		1.73089
		1.70402	0.927275	1.5041		1.30959
		1.81608	1.46511	3.23725		1.54559
		1.65593	1.19539	2.19493		1.03581
		1.17704	1.3546	2.93466		2.08848
		2.55021	1.42783	2.19662		1.23939
		2.132	1.73991	2.59376		2.13707
		1.50873	1.33368	1.8524		1.01096
		1.93758	1.7379	2.53966		1.2282
		1.26034	1.57539	2.71423		1.0197
		1.63465	1.39958	3.09159		1.07292
		1.75876	0.892928	1.7692		1.35224
		1.13916	1.63365	2.90211		1.48009
		2.49993	0.906157	2.02384		1.4727
		0.831877	0.88213	2.25954		2.32224
		1.75826	1.71141	2.84018		1.28076
		2.11816	1.52981	2.86047		1.30683
		1.71633	1.30452	1.42189		1.64487
		1.40498	1.31615	1.98896		1.72835
		2.30444	1.03814	1.98157		0.497318
		1.82545	1.95836	2.42439		1.28077
		1.34905	2.16954	1.77071		2.25033
		2.24648	1.64852	2.53158		0.359056
		1.62523	2.26009	1.98225		2.05219
		5.18665	2.10107	3.05625		1.66393
		1.65729	2.03824	3.02999		1.6075
		2.34571	2.62297	2.59446		1.57434
		1.5916	2.55297	2.02103		1.41989
		2.11208	1.36423	2.14773		1.3194
		2.38563	1.63331	1.92074		1.26079
		2.17727	2.51916	1.11866		1.04697
		1.70317	2.08738	1.44263		1.09612
		1.06546	1.98607	2.25293		1.90986
		1.80388	1.55165	3.65335		2.28668
		1.71724	1.78244	4.34134		1.9765
		1.71705	1.95623	1.29564		1.8126
		1.995	2.16572	1.89765		1.64639
		1.184	2.01603	1.94733		2.25499
		1.49543	2.00629	2.45217		0.664279
		1.40235	2.39992	2.63014		1.99441
		2.33612	1.70002	1.91679		2.29178
		2.35655	1.81173	1.47786		1.17821
		1.42964	2.37461	1.28125		1.61506
		2.13469	1.26488	2.64624		1.74962
		2.54853	2.2812	1.6772		1.14101
		1.809	1.35916	2.21224		1.17606
		1.31072	1.79847	2.11348		1.15668
		2.93522	1.55181	2.18738		1.82566
		1.97973	1.14743	2.78253		1.38757
		2.10713	1.59921	2.51576		1.61608
		2.1264	1.44559	2.88789		1.62486
		1.64165	1.81462	2.23215		1.47502
		2.00447	1.25348	2.0138		1.43128
		1.80491	3.00426	2.4407		1.4899
		1.63633	1.26157	2.51041		1.88848
		2.57004	1.43754	2.79383		2.11201
		1.34003	0.919581	1.62902		1.64186
		1.5633	1.68275	1.79294		1.21413
		1.47491	1.20331	2.06123		0.935216
		1.99732	0.965358	2.18285		1.8314
		1.92569	2.00072	1.56248		1.61168
		1.48894	1.47206	1.89759		1.2493
		2.0812	2.3802	1.97295		1.32361
		1.08895	1.69694	2.45878		1.85546
		2.02933	1.50065	1.71315		1.59635
		1.19609	1.40604	1.68208		1.36715
		1.19004	2.17745	1.81295		1.21433
		1.40515	2.03602	2.97536		1.6798
		1.1671	1.73895	2.46927		1.64652
		2.00908	1.31995	2.97458		0.78466
		1.40506	1.40003	1.88049		1.30091
		1.72142	1.60158	2.3275		1.30517
		1.49998	2.38497	1.91542		1.19443
		1.65287	1.86959	1.80902		1.58631
		1.18645	1.78153	1.9021		1.80203
		3.16691	2.44504	2.99181		1.56959
		1.34791	1.33673	2.15569		1.15423
		2.02704	1.70709	2.51285		1.18744
		2.43556	1.47878	2.78478		0.938673
		1.68217	1.91111	2.08016		0.993263
		1.15652	1.67893	2.82429		1.32448
		2.41798	1.81007	2.31609		1.79414
		2.09192	1.65715	4.35506		0.864041
		1.74755	1.86649	2.32589		1.24921
		2.63357	2.16854	3.15206		1.26141
		1.9824	1.58346	2.21594		0.87642
		2.16877	1.75854	1.65247		1.67844
		1.86242	1.91183	2.67812		1.88274
		2.32513	1.68075	2.44767		1.09048
		2.13743	2.32589	2.25862		1.53253
		1.58293	2.54589	2.50879		2.56727
		2.06185	2.08081	2.6771		1.77195
		2.50125	1.40881	2.78366		1.52023
		2.31579	1.59954	2.43567		1.62187
		1.86725	1.24123	2.71966		0.847264
		2.52727	1.51165	2.82363		1.11866
		1.44956	1.1549	2.4828		1.41158
		1.66705	1.92195	1.21132		1.72812
		1.20622	1.31236	3.06363		2.41438
		1.89817	2.12955	2.27373		1.6227
		1.36952	1.40561	2.43449		0.969896
		1.50005	1.61678	2.05693		1.398
		2.38129	1.62428	2.24242		2.3447
		2.96958	1.21851	2.55294		1.0136
		1.07708	1.70979	2.11058		1.74094
		1.57317	1.12717	2.24039		1.02965
		1.17825	2.94276	2.16553		2.38852
		2.11075	1.19468	1.68104		1.3329
		1.74308	0.875937	1.4794		1.32907
		1.71623	2.05821	4.61032		1.26599
		1.22146	1.64842	1.82438		2.54683
		2.33829	2.27967	1.95604		1.15728
		1.85293	1.35337	1.60382		1.65325
		2.04826	1.27433	1.70888		1.35899
		1.57065	1.71029	1.96608		1.79505
		2.71441	1.14579	2.67924		2.21967
		1.91896	2.04895	2.72024		1.69233
		2.03048	2.17069	1.65439		1.56038
		1.49632	1.84998	2.50831		2.97168
		1.92494	1.87721	1.53985		1.83928
		1.60228	1.59784	3.38649		1.87786
		1.93248	1.4507	1.85788		1.4751
		2.10025	1.68881	0.907477		1.65671
		1.49153	2.79162	1.63411		1.39467
		1.12776	1.25725	2.43146		1.1955
		0.964333	1.32255	1.9241		1.71543
		1.80844	2.23285	1.8069		1.24605
		1.63388	1.63663	1.53392		0.98729
		1.34864	1.84128	1.90077		2.16435
		1.69619	1.87247	2.72108		0.785632
		2.50101	2.64672	3.00431		1.08989
		1.60628	1.68928	1.71655		1.48203
		2.07448	2.08676	1.75753		1.09519
		2.20918	1.4388	1.46684		1.61453
		2.1283	1.04321	2.57232		1.80582
		1.11789	2.06107	2.66521		1.56216
		1.66594	1.10171	2.76923		1.30483
		2.11478	1.56632	2.03679		1.76859
		1.35136	2.35583	2.92017		2.15833
		1.52666	1.60679	3.13149		0.850338
		2.06713	2.08095	3.45285		0.790491
		0.827574	2.35791	3.47116		1.21527
		2.11993	2.45027	2.04316		1.47972
		0.997521	1.9339	3.81163		1.30944
		1.12016	2.41454	1.84308		1.21084
		1.95522	2.39567	3.64823		0.847929
		1.89765	2.24824	2.42255		2.74112
		2.02517	1.54568	2.45838		1.47451
		1.44	2.90822	2.73593		1.3759
		2.57113	1.36107	3.57876		1.19062
		1.96454	1.91887	2.67363		2.84117
		1.64752	2.12671	2.69453		3.19398
		3.1452	1.21941	2.05454		0.853639
		2.3288	1.64214	3.62062		1.21809
		1.77763	2.35978	2.74093		2.77733
		1.37295	1.91637	1.66354		2.26561
		3.01675	1.54529	2.49029		1.59421
		1.38109	1.88591	3.28048		1.95279
		1.93556	2.18668	2.43193		0.995396
		1.00833	2.48818	2.04682		1.84719
		2.01536	1.86736	2.52716		1.42227
		1.34598	2.13383	2.55722		1.22889
		0.690232	2.64009	1.04926		1.26842
		0.529313	2.7447	2.15077		1.28049
		1.5187	2.65764	2.15721		1.39226
		0.949524	2.08577	2.06599		1.18541
		1.10185	1.26511	4.73923		1.62539
		1.0596	1.87684	2.56232		1.42059
		1.32035	1.79127	2.20296		1.81299
		0.705252	2.84295	2.52052		1.41942
		0.903165	1.97155	3.63961		1.63509
		1.55214	2.06402	2.9178		1.08412
		0.857358	1.27737	2.64584		1.10406
		1.0178	1.57578	2.49473		1.00053
		1.18795	2.59466	1.90701		2.49536
		1.17573	2.5622	2.03095		2.02703
		1.53783	1.64217	2.93451		1.38072
		1.31003	2.14057	1.77523		1.73548
		1.28706	2.93551	2.52691		1.28733
		1.3045	2.07052	1.93575		1.26542
		1.02065	2.27651	2.40028		1.41141
		0.789181	2.46682	2.43494		1.65761
		0.833574	1.71319	1.85601		1.70317
		1.14339	1.09041	2.26582		0.893275
		1.02586	1.56114	2.20742		0.94617
		0.847487	2.39405	2.32522		1.38678
		1.20826	1.88242	3.79986		1.50947
		1.05174	1.77522	2.65998		0.88125
		1.52276	1.68098	2.16875		1.70204
		0.947317	2.5759	1.9487		1.19232
		1.81783	2.1455	1.96889		1.59307
		1.43979	1.79137	2.71551		0.947635
		1.42804	1.66686	3.10141		0.840434
		1.61643	1.50271	3.4312		1.41078
		1.46726	1.66441	3.6696		2.04359
		0.897284	2.23621	1.78828		1.54626
		1.06121	2.40751	2.07439		1.4466
		1.09354	1.66327	2.17293		0.959056
		0.947547	1.9921	2.45795		1.12554
		2.1614	1.81652	3.25761		1.50403
		1.31659	1.97243	2.21582		1.51237
		1.60976	2.06892	2.28089		0.813583
		1.1375	2.02812	2.37798		0.918193
		1.64791	2.27888	2.88968		1.8079
		1.05159	1.72102	2.611		2.08117
		0.912497	2.15159	2.47383		1.17081
		2.70127	1.92772	2.00704		1.22245
		1.36555	2.45092	1.30481		1.25371
		1.29817	1.94614	2.30358		0.946858
		1.32882	1.64019	3.65292		1.54557
		1.20349	2.20883	1.22789		1.84946
		0.872858	1.88869	1.79443		1.34693
		2.0225	1.58954	2.07689		1.45981
		1.25205	1.51179	2.65604		0.721733
		0.863085	1.4869	1.52037		1.40225
		1.85522	2.01267	2.60207		0.970881
		1.63227	3.32226	2.1508		2.07986
		1.10764	1.62611	2.11328		1.08523
		1.4456	1.9092	1.20371		0.843913
		0.891818	2.19095	3.15875		2.05197
		1.52379	1.85103	2.29647		1.40979
		0.963073	1.93788	1.9799		0.928811
		1.06873	2.02493	3.57765		1.02646
		0.821873	1.76611	2.40257		1.11382
		1.05824	2.59067	3.40133		1.35579
		0.82426	2.05882	2.3362		1.45845
		1.47097	1.87812	3.3617		1.56073
		1.18087	2.24366	2.32169		2.8039
		1.26546	2.21	2.03402		1.93412
		1.01455	2.59315	2.25458		1.54034
		1.84948	2.43073	2.6756		1.54649
		1.14579	1.70278	1.58513		1.7391
		0.93458	1.80799	2.89777		1.41529
		1.27205	1.58111	2.68411		0.859962
		0.902985	2.52678	2.88835		1.13165
		1.4539	2.15638	1.77668		1.92151
		1.61294	1.7832	1.76341		1.83636
		1.37925	1.81491	3.00474		0.856384
		1.84139	2.82233	2.20737		1.87101
		1.33189	1.90559	2.00799		1.22509
		1.39555	2.95498	2.4806		1.49559
		1.41967	1.74084	1.35175		1.24097
		1.41962	1.49027	2.51077		1.64925
		1.56997	1.85537	1.7554		1.15165
		1.27833	1.27073	2.06828		1.64052
		1.67136	1.77711	2.16857		1.04865
		1.52775	1.47247	2.48295		1.52843
		1.2579	1.51487	2.2748		2.07406
		1.6864	1.11804	1.0755		1.12999
		1.41619	1.99436	2.08079		1.18588
		1.74775	1.38706	1.93205		0.885346
		1.84449	2.30565	2.95457		1.51868
		1.28769	1.82573	2.37475		2.73239
		2.05217	1.68571	3.38073		0.587617
		0.86936	2.0874	3.37352		1.43611
		1.10299	1.42085	1.97906		1.77544
		1.32235	1.22928	2.35617		1.21457
		1.40794	2.83751	4.01453		1.04909
		1.03045	2.0035	2.03599		1.65551
		1.36234	1.88544	2.74676		1.72343
		1.34112	2.74932	1.84993		1.79575
		0.786669	2.14133	2.17805		1.57223
		2.37554	1.59026	1.78577		0.895775
		1.42797	2.20664	1.97842		1.18504
		0.969025	2.29934	2.70456		0.801108
		1.0815	1.77389	3.04686		1.4674
		1.36268	1.47904	2.22685		1.25255
		1.53199	1.74501	1.82929		1.44191
		2.19739	1.1746	3.63299		1.78315
		1.56689	2.25773	2.03135		1.62737
		1.21417	2.56792	1.69054		1.93251
		1.28379	1.95016	2.76709		1.30869
		0.942835	2.73141	3.60116		1.21294
		1.35718	2.14216	2.34817		1.12332
		1.45495	1.76141	2.41809		1.0927
		0.950928	1.14916	2.33597		2.91348
		1.26618	1.53609	1.85001		1.61031
		0.918625	2.72539	2.92186		1.07598
		0.868937	1.87336	3.10131		1.36327
		1.91771	1.57648	1.20553		1.1375
		1.86539	2.09575	3.08315		1.98827
		1.36704	2.14593	2.05529		1.59192
		1.65212	2.51812	3.25161		1.51219
		1.25934	2.45239	2.27806		1.06729
		1.20101	1.22892	2.41555		1.28571
		1.20391	1.78136	3.09875		1.24063
		1.63157	1.72085	1.11422		1.34078
		1.3974	1.59544	2.51612		1.18172
		2.08387	3.11532	2.25244		1.39744
		0.905045	1.45181	2.94571		1.46907
		1.53224	1.60973	2.1564		1.66286
		0.865507	2.40268	2.62427		1.143
		2.07593	2.1901	1.83329		1.49921
		0.98141	2.36608	2.25152		1.35396
		0.789284	1.37786	1.97038		1.97443
		1.27031	2.49011	2.44448		1.74666
		1.18701	1.95596	2.96339		1.87824
		1.19093	2.39332	2.72576		1.06067
		1.06759	1.45654	1.64426		1.20762
		0.979374	1.72025	1.86966		1.27442
		1.699	1.95704	1.82149		1.46453
		1.38992	2.5541	2.08985		1.96401
		1.38404	1.96839	2.37242		1.08078
		1.10574	1.52017	1.75287		1.73478
		1.22428	1.30693	2.06914		1.08996
		0.704422	2.16284	3.06757		1.8224
		1.1566	1.28482	1.80378		1.06154
		1.1305	1.58138	2.94353		1.38653
		0.950857	1.16945	1.35656		0.948011
		1.52466	1.41915	2.23997		1.84941
		1.17444	1.74768	0.682185		1.28635
		1.08279	2.72781	1.87252		1.19842
		1.70734	2.02001	1.95041		1.6164
		1.09067	1.30499	2.23752		1.58706
		1.28633	2.65399	3.04733		1.31649
		1.34149	1.79384	1.47314		1.78704
		0.963752	1.87953	1.63558		1.19363
		1.21977	0.997379	0.890435		1.41129
		1.52643	1.94551	1.66692		1.57983
		1.00817	1.33564	1.84678		1.74036
		1.71949	1.14658	1.44654		1.69752
		1.17802	1.34382	1.34809		1.15943
		1.4188	1.47341	1.95818		1.20268
		1.29668	2.76049	2.58926		1.30681
		1.44522	1.21091	1.20215		1.21864
		1.48763	2.13112	1.42607		1.86156
		1.65922	1.91668	1.4164		1.37538
		1.4866	1.59864	1.00963		1.34383
		1.86255	2.59251	1.608		0.70895
		1.31772	1.59712	1.07712		1.20801
		1.6748	2.00016	1.74978		1.87744
		1.03644	2.48641	1.42818		0.799211
		2.27011	1.41397	1.58461		0.974744
		1.19263	1.24321	2.54017		1.03485
		1.61617	2.09439	1.46946		1.42416
		2.11921	2.47316	2.64562		1.19418
		1.52773	1.67614	1.25039		1.68401
		1.71468	2.05876	1.63563		1.54543
		1.1514	1.35675	1.20207		1.45137
		1.37204	2.62623	1.75203		2.08848
		1.05267	1.87578	1.43843		1.80147
		0.946393	1.72483	1.79877		1.52811
		1.94811	2.52233	1.55638		1.81703
		1.96319	1.34384	1.36444		1.00299
		1.40929	1.81227	1.29818		0.946556
		0.872136	2.14631	1.47139		0.970863
		1.17442	1.93213	0.914626		1.78173
		1.37553	1.89782	1.64989		0.788402
		0.822343	1.33088	1.68853		1.72918
		1.20745	1.47473	2.97157		1.33965
		2.62046	1.70876	1.8978		1.28058
		2.06999	1.27807	2.04852		0.957186
		1.11808	1.32146	3.35674		1.52795
		1.60738	1.88411	1.22567		1.18441
		1.42336	1.77636	2.17935		1.01878
		1.20364	1.01819	1.81555		0.82226
		1.38433	2.30113	1.89018		0.72468
		1.11642	0.85087	1.50064		0.980998
		1.0045	1.23937	2.29095		1.14054
		1.17821	1.79887	3.15608		1.20427
		1.73283	1.79815	1.63625		1.59189
		1.03784	1.57413	1.81695		1.31411
		1.3874	0.874112	2.14926		0.979884
		1.67629	1.45005	1.63923		1.23212
		1.3676	2.43125	2.35313		1.10139
		1.68477	1.19297	1.86192		1.26956
		1.66556	2.14432	1.2666		1.78048
		1.07495	1.77362	2.50806		1.80833
		1.54099	1.99066	2.15142		1.14234
		1.93756	1.8386	2.53738		1.0366
		1.37362	2.01116	2.15802		1.01019
		1.15282	1.57463	3.1744		2.17316
		1.41812	2.6188	2.10089		1.20339
		1.84044	2.51665	2.00509		1.10205
		1.67948	1.5318	1.83142		1.75582
		1.16354	1.27948	1.64562		1.3944
		1.45181	1.24441	2.01503		1.39793
		1.58764	2.50492	1.11363		2.17679
		1.22049	1.35982	2.0736		1.39499
		0.639529	1.73568	3.70141		1.11581
		2.08497	1.46493	1.4842		0.854295
		1.8286	2.18803	1.16448		1.52083
		1.06746	1.75209	2.50604		1.50466
		1.27854	2.60604	1.29444		0.992631
		1.67059	1.72711	1.5846		1.04609
		1.28376	1.78001	2.18661		1.40017
		1.21796	1.37105	2.08096		1.18756
		1.22774	1.92565	2.45623		1.12417
		1.42764	1.67012	1.77818		1.17473
		1.18629	1.91791	1.31031		0.944532
		0.971523	1.29917	1.17362		1.50763
		1.83335	2.27804	1.67271		1.03642
		1.53367	1.76642	1.76315		1.69885
		1.19436	1.94608	1.74605		2.29937
		1.50574	1.36961	1.6617		0.988218
		2.14063	1.99475	2.35782		1.25243
		1.55341	1.23195	1.76353		1.24295
		2.67173	1.5493	2.3597		1.32231
		1.29194	3.18894	2.31424		1.09549
		1.4178	1.62387	1.5622		1.72143
		1.85704	1.3783	1.95506		1.32932
		1.06568	1.45081	1.61155		1.18091
		1.24383	2.65663	1.89393		1.32211
		1.60226	1.36915	1.25979		1.22772
			1.44049	1.79142		1.35778
			1.18403	1.7518		0.675948
			1.87006	1.18854		1.5689
			1.9727	1.50614		1.51121
			1.23858	1.34546		1.26017
			1.48798	2.61692		1.19432
			1.4148	2.13296		1.78157
			0.974503	1.65707		1.09899
			1.69345	1.60673		0.996624
			1.46855	1.64135		1.32532
			1.26631	1.51518		1.15287
			2.72269	1.85054		1.00351
			2.28021	1.31187		1.65339
			1.48364	1.31598		1.71954
			1.21849	1.51038		1.38793
			2.23334	1.442		1.87065
			1.52546	1.51219		1.71678
			2.7697	1.24749		1.62825
			1.39176	1.42467		1.17754
			1.77874	1.6808		0.998931
			2.35555	2.39508		1.04051
			2.22147	1.64593		1.71425
			1.46172	2.10519		0.866646
			1.57055	1.65151		1.3089
			1.24888	1.20209		1.31705
			2.12752	1.65864		1.09848
			1.62767	1.75337		1.95046
			1.45542	1.59119		0.852887
			1.76133	1.87002		1.21307
			1.71698	2.00823		0.845882
			1.70461	2.10014		1.39594
			1.35569	1.81931		1.7271
			1.70942	1.3109		1.85966
			1.42557	1.81822		1.25357
			1.85393	1.42228		1.96673
			1.35087	2.09595		1.10261
			1.21237	2.45017		1.33977
			1.59573	1.86548		1.08288
			2.08915	2.18648		1.37113
			2.72399	2.70264		1.37636
			2.50057	1.20388		1.09654
			1.99981	1.69118		1.69062
			2.26952	2.36306		1.33344
			1.75287	1.6492		1.12591
			1.20074	1.67453		1.01116
			1.75991	2.5077		1.2542
			1.50757	2.67706		1.66312
			1.07705	2.67496		1.06404
			1.85668	2.12349		1.93277
			2.33504	1.35726		3.03167
			2.05758	2.14841		1.39744
			1.72753	1.66236		0.849615
			1.84333	1.21572		0.790491
			2.69608	2.081		0.621585
			2.53985	2.25506		1.40703
			2.0076	1.63906		1.27277
			2.3059	2.5274		1.13283
			1.69651	2.20174		0.922956
			1.46651	2.38911		1.3912
			1.65956	2.37095		1.02391
			1.41226	1.51221		0.99758
			1.51827	1.38694		0.970454
			1.76769	1.35232		1.39105
			2.15187	2.1546		2.102
			1.93855	2.5396		1.17802
			1.92041	1.46457		1.2557
			2.17698	2.01369		1.21094
			2.58718	2.23634		1.32278
			1.26046	3.0614		0.603781
			1.25007	2.30531		0.543323
			2.33133	2.56194		1.7634
			1.7088	1.79705		0.906219
			1.52481	1.50465		1.28969
			1.96211	1.49333		1.03365
			0.942627	1.92599		1.38391
			1.52006	1.79472		1.02951
			1.70812	2.00114		1.56148
			2.89004	2.19539		0.901825
			1.73085	1.86516		1.16851
			1.92357	1.81836		1.12229
			1.56357	1.09277		1.3068
			1.35399	0.899187		1.01461
			2.92645	1.72324		0.608945
			2.24025	1.42239
			2.22466	1.26833
			1.18345	2.33619
			1.4586	1.50235
			1.39287	2.20304
			2.24604	1.21466
			1.82703	1.92177
			1.4455	1.8901
			1.02291	1.73831
			1.82553	2.59556
			2.06511	1.90737
			1.67344	2.10513
			1.5901	1.51787
			2.11524	1.62393
			2.05173	1.04356
			2.02614	2.10508
			2.56523	1.14184
			1.47874	1.97509
			1.95185	2.34589
			2.85732	2.32328
			1.3237	1.60671
			1.73909	1.70824
			1.33233	2.30104
			2.22923	1.45069
			1.46291	1.91887
			1.98564	0.993682
			1.06979	3.35981
			1.23839	1.14905
			1.3224	1.46239
			1.99893	1.86256
			2.67411	1.54799
			2.07032	0.987094
			2.383	2.87479
			1.29215	1.37554
			1.7939	1.30165
			2.2591	1.8451
			1.65532	1.66047
			2.74329	2.52934
			1.21715	1.80029
			2.1165	1.64857
			2.50442	2.21076
			1.96565	2.05664
			1.25375	2.18481
			1.86108	1.69015
			1.76296	1.49029
			1.37064	1.93715
			1.56542	2.15456
			2.27381	1.85066
			1.94623	1.65126
			1.51021	1.38069
			1.97343	1.43837
			1.75058	1.55678
			2.12792	1.512
			1.98927	1.05213
			1.41353	1.47615
			2.25376	1.48918
			1.81381	1.51959
			1.36807	2.48227
			1.97164	1.21282
			1.68796	1.21132
			1.9325	1.90511
			1.28235	1.43082
			2.09207	2.11476
			1.07413	1.61173
			1.48186	2.80038
			1.37619	1.7909
			1.85347	2.26793
			1.73068	1.29524
			1.68755	2.76566
			1.20963	2.19906
			1.9007	1.8254
			2.72015	1.92872
			1.63397	1.78115
			1.97284	2.24766
			2.13036	2.03346
			1.24782	2.33632
			2.0848	1.62817
			1.07142	2.05017
			1.6766	1.3504
			1.09766	3.18429
			1.61683	1.97948
			2.29861	1.6778
			1.5545	2.41604
			1.65678	1.20672
			1.87205	1.84819
			1.56685	1.85421
			1.67504	1.69094
			1.58095	1.71507
			2.77666	2.43806
			2.24518	1.5608
			2.99413	2.09996
			2.22305	3.00067
			2.32406	2.13333
			1.346	2.41936
			2.02502	2.82671
			1.69004	1.29053
			2.11709	1.63822
			1.50463	2.29122
			1.52757	1.69199
			1.78741	1.00487
			1.41906	2.26916
			2.32581	1.38056
			2.47045	1.44381
			2.34802	1.16217
			1.23988	1.08524
			1.63493	1.56977
			1.7737	0.883078
			1.46638	1.63996
			2.57919	1.29214
			1.6231	1.09083
			1.95519	1.91032
			1.70949	1.63698
			1.31231	1.80758
			1.68755	1.54356
			2.02669	1.97325
			1.35471	1.26512
			1.1799	1.78315
			2.11642	1.8496
			1.68634	1.8663
			1.47084	1.05639
			1.82309	1.03214
			1.26701	2.05545
			1.44366	1.9194
			2.09968	2.08878
			0.962675	1.93045
			2.30169	1.90613
			1.83542	2.01137
			1.45117	1.85675
			1.10246	1.49491
			1.82351	1.01637
			1.1768	2.17029
			1.32359	0.932531
			2.45379	2.10862
			1.31602	2.02902
			2.01793	1.7556
			2.46677	1.78549
			2.11183	2.13653
			1.69488	1.32386
			2.47741	1.95516
			1.95461	1.45942
			2.14425	1.8888
			2.40097	1.08374
			1.15851	1.56177
			1.35187	1.67107
			1.5185	1.91469
			2.23557	1.97395
			1.54737	1.54421
			1.59357	2.20611
			2.69534	1.35139
			1.49459	1.68721
			1.21138	1.66198
			1.68049	1.03883
			2.09918	2.51889
			1.97626	1.53089
			1.99038	2.03615
			1.56735	2.00595
			1.62545	2.23477
			1.43591	2.15271
			1.86309	2.26905
			1.66468	1.68332
			2.46473	1.83713
			2.34426	1.89813
			2.09842	1.91063
			1.44572	2.99646
			1.7106	1.54638
			0.980524	1.89852
			1.49181	2.14636
			2.46267	2.05971
			1.46815	2.26296
			1.7605	0.519622
			1.3391	1.54409
			1.65416	1.51955
			1.67853	1.54379
			1.35672	1.16272
			1.5289	1.85704
			2.67962	1.51205
			2.67131	1.9184
			1.78691	1.4123
			0.986226	2.35495
			1.24852	2.46195
			2.13663	1.96368
			1.55443	1.6527
			2.10102	1.21047
			1.11903	1.27463
			1.46304	1.10844
			1.07717	2.10851
			2.00096	1.71609
			1.70206	1.68116
			2.11393	1.52259
			2.24754	2.97432
			1.90181	1.84004
			1.34565	1.8598
			1.87972
			1.36849
			2.3957
			1.86718
			1.84437
			1.33689
			2.09927
			2.85975
			2.00066
			2.17
			1.36888
			1.57332
			2.49724
			2.36445
			1.69426
			2.46822
			1.98422
			2.26404
			0.921833
			1.03659
			1.05957
			0.57506
			1.39557
			1.07296
			1.74907
			1.27044
			2.00549
			1.35679
			2.42957
			1.66803
			2.20728
			1.69814
			2.24276
			1.13238
			2.37588
			1.21895
			1.91549
			1.64271
			1.90605
			2.02262
			1.5234
			1.38156
			1.58307
			1.89245
			1.15283
			1.01144
			0.743133
			1.10868
			1.48685
			1.89086
			1.67114
			1.40948
			1.44519
			1.96706
			1.35322
			1.62708
			1.48558
			1.71152
			1.44341
			2.97643
			1.59391
			1.77276
			1.97528
			1.24362
			2.10111
			1.80384
			1.6134
			1.51203
			1.49686
			1.13622
			1.24112
			1.6735
			1.66863
			2.17575
			0.910927
			1.52878
			1.58276
			1.11103
			2.02161
			1.70016
			2.19067
			1.65845
			1.96487
			0.876747
			1.43274
			1.53934
			1.29305
			1.67318
			0.724722
			1.30517
			1.06543
			1.39205
			2.27363
			1.66022
			1.96025
			1.0189
			1.47002
			0.844334
			1.04864
			0.935361
			1.81394
			1.81701
			1.04953
			2.03412
			1.46181
			1.44087
			1.4799
			1.66155
			1.80202
			1.59426
			1.44424
			0.915146
			1.72482
			1.50434
			1.65727
			2.50109
			1.11676
			2.24994
			2.35671
			0.71078
			1.38181
			1.87059
			0.585222
			1.0674
			1.14994
			2.00192
			0.745004
			0.639778
			1.7375
			1.53868
			1.53255
			1.99254
			2.54397
			1.55491
			1.43745
			1.86708
			2.06829
			1.93257
			1.70333
			1.74015
			1.11407
			1.76047
			1.93109
			1.90194
			0.924993
			1.4002
			0.861829
			1.76037
			1.3371
			1.69793
			1.67207
			1.39193
			1.94657
			0.924034
			1.13927
			2.02584
			0.936777
			1.33377
			1.37274
			1.61565
			1.36358
			2.26554
			2.36651
			1.52254
			2.19959
			1.60929
			1.01017
			2.02839
			1.66877
			1.8211
			1.86605
			1.55932
			1.96257
			1.76432
			1.20442
			1.91049
			1.47519
			1.60571
			1.34573
			1.92993
			1.29078
			1.19666
			1.73982
			1.43161
			1.73243
			2.37147
			1.32918
			1.43821
			1.77172
			1.09594
			1.37399
			1.24707
			1.09373
			2.55571
			1.54064
			2.20945
			1.2998
			2.2331
			1.593
			1.16605
			1.68904
			1.98354
			1.82576
			2.15337
			1.80727
			1.6183
			1.67387
			1.04163
			1.79587
			1.61455
			2.08894
			1.85718
			2.07608
			2.10184
			2.21516
			1.55827
			1.56828
			0.785238
			1.529
			2.13094
			1.59298
			1.10869
			1.6201
			1.81046
			1.51098
			1.73169
			1.72341
			1.75854
			2.8365
			0.961011
			1.65756
			1.15186
			1.59892
			1.58862
			2.96556
			1.78817
			1.5186
			1.50937
			1.34961
			0.951297
			1.9903
			1.37662
			1.79166
			2.57259
			2.13263
			2.35127
			1.692
			1.57957
			1.6585
			1.75819
			1.8995
			1.2996
			1.54339
			0.978392
			1.9093
			0.926738
			1.85072
			1.89851
			2.02284
			2.06156
			1.56517
			1.90828
			1.68772
			2.04216
			1.7889
			1.19096
			1.86471
			0.920458
			1.81968
			1.23388
			1.84185
			1.29736
			1.5666
			2.05119
			1.0024
			2.35084
			1.78221
			2.4538
			1.39749
			1.45172
			1.07322
			1.17058
			1.89698
			1.53084
			1.52648
			1.59919
			1.62576
			1.47255
			1.33654
			1.34286
			1.13325
			1.57354
			1.53795
			1.82502
			2.04992
			1.81036
			1.52637
			1.45351
			1.44606
			1.22031
			1.77877
			1.41455
			1.14027
			1.98775
			1.60911
			1.79503
			1.71524
			1.75074
			1.03061
			1.21817
			1.38815
			2.54084
			2.08779
			1.70057
			2.08795
			0.710039
			2.02265
			1.63689
			1.60512
			0.786891
			1.22159
			1.71184
			1.02406
			1.51055
			1.52423
			1.35613
			1.7051
			1.92876
			1.29928
			2.36978
			3.38611
			1.92666
			2.10848
			1.6772
			1.65475
			1.81692
			1.42904
			1.2703
			1.62467
			1.1311
			1.41483
			1.8879
			0.954358
			2.62907
			2.12069
			1.60808
			1.83656
			1.50774
			4.2056
			1.65234
			0.724723
			2.21051
			2.32039
			1.80661
			1.17893
			1.10286
			1.98334
			1.22128
			1.40741
			1.33006
			1.5398
			2.32592
			2.26477
			1.8696
			1.7682
			1.67167
			1.52839
			1.63692
			1.97084
			1.82625
			1.68292
			0.668703
			1.34508
			1.39454
			2.16293
			1.66844
			2.72164
			1.6666
			1.69248
			1.49018
			1.84885
			1.63397
			2.10786
			1.99294
			0.556432
			1.34686
			1.23521
			1.65709
			2.816
			0.903773
			1.59227
			1.25319
			1.62831
			0.997453
			1.31627
			0.853071
			1.37236
			1.79767
			0.964539
			1.38771
			1.2349
			1.46673
			1.72008
			0.705833
			1.45328
			1.39547
			2.24032
			0.987623
			0.84765
			2.17698
			1.62135
			1.85269
			0.854665
			1.32859
			1.71715
			1.00903
			1.69089
			1.56646
			1.28841
			1.4689
			1.23275
			1.21724
			2.01355
			1.88093
			1.9151
			1.30948
			3.05568
			1.90553
			1.20051
			1.67405
			1.83599
			1.06822
			1.03957
			2.04088
			1.38274
			1.33063
			1.76154
			1.54774
			1.44699
			1.94157
			1.77984
			1.7296
			1.44698
			2.65001
			1.50343
			1.57405
			1.83944
			1.83375
			1.8227
			1.73459
			1.00886
			1.51819
			1.3545
			1.27793
			1.52036
			2.22354
			0.868543
			1.71395
			1.59505
			1.12054
			0.978423
			1.94024
			1.32903
			1.73757
			0.908023
			1.31558
			1.57271
			1.19591
			1.62674
			1.53823
			1.47141
			1.81004
			1.20113
			2.28077
			1.28958
			1.70221
			0.89311
			1.14646
			1.1749
			1.70305
			1.50831
			1.10607
			1.90021
			2.2729
			1.30056
			1.44752
			1.32639
			1.67493
			1.92055
			1.40992
			1.25585
			1.47662
			1.46333
			1.65557
			1.33296
			1.46827
			2.3501
			2.41652
			0.729564
			1.55668
			0.959606
			1.16862
			1.7553
			1.42037
			1.94562
			0.556088
			1.57902
			1.65914
			1.54577
			1.74844
			0.942575
			1.96392
			1.9303
			1.32924
			1.47322
			1.35145
			2.06447
			1.10212
			1.98728
			1.79534
			1.56473
			1.49189
			0.985087
			1.94522
			2.05954
			1.39346
			1.68275
			1.31873
			1.21298
			1.37982
			1.53913
			1.41053
			1.36928
			1.15271
			1.47586
			1.40315
			1.1214
			1.3121
			1.57278
			0.782174
			1.16855
			1.40774
			0.971557
			1.64901
			1.32306
			2.61388
			2.07158
			1.96556
			1.57062
			0.914174
			2.00953
			1.46817
			1.86069
			1.45739
			1.65999
			1.28008
			1.58416
			1.98603
			1.87899
			1.60953
			1.7567
			1.21426
			1.24048
			1.02518
			1.28428
			1.97057
			1.38218
			1.66546
			1.0008
			1.19322
			0.875459
			1.25557
			1.64437
			1.93369
			1.28001
			0.829423
			1.32196
			1.37766
			0.961682
			1.23738
			1.43967
			1.38222
			1.7655
			1.36641
			2.46788
			2.2217
			1.98782
			1.22867
			1.23924
			2.19273
			1.08827
			1.18946
			1.77829
			1.86337
			1.8756
			1.50654
			2.24425
			1.82454
			0.843872
			1.92904
			1.4409
			1.58004
			1.75122
			1.30621
			1.13643
			1.19134
			0.9597
			2.54704
			1.38868
			1.0743
			1.78756
			2.12267
			1.39334
			1.38797
			1.76499
			1.86912
			2.08644
			1.46935
			1.0851
			1.48771
			1.549
			1.64014
			1.17554
			1.20398
			1.64378
			1.39345
			1.58283
			1.26856
			1.04414
			2.74819
			1.35564
			1.14021
			1.37358
			1.61329
			1.66224
			2.46183
			1.561
			1.04014
			1.59854
			1.35298
			1.43278
			2.83921
			1.6161
			1.16108
			1.86145
			1.3706
			2.1106
			1.9118
			2.35505
			2.0227
			2.10338
			1.43833
			1.58553
			1.40506
			1.35228
			1.53254
			1.73831
			1.18973
			1.56768
			1.43258
			1.45279
			1.77537
			1.01298
			0.879099
			1.65927
			1.52375
			1.44951
			1.75479
			1.30631
			1.10158
			1.53449
			1.36211
			1.42983
			1.11642
			0.949477
			1.72498
			1.04144
			1.13144
			1.69133
			1.49886
			1.25107

## Sheet: Fig. sup. 3E
10 min cell volume - phase 3
	Control	PA(11)	VAN(20)	PA + VAN(10)	PA + VAN(20)
	2.2529	0.92388	1.60842	1.95952	0.689355
	1.0671	2.32002	2.02217	2.7414	1.13865
	1.70876	1.38001	2.01	1.19535	2.11246
	1.4927	2.14177	2.26263	0.921615	1.1129
	2.46378	1.05841	1.66381	1.21463	3.10655
	2.405	0.941232	1.73705	1.11035	1.2033
	2.16646	1.49945	1.45234	1.72332	1.21354
	3.36564	2.0339	2.22771	1.50467	1.3585
	1.89524	1.48035	2.26697	1.45964	1.91584
	2.09124	2.64299	1.95227	0.70045	2.20103
	1.62037	2.16825	2.43083	1.82704	1.27185
	2.30184	2.41841	2.21989	2.04303	1.135
	1.66656	2.27901	1.52981	1.51133	1.28785
	2.18579	1.55223	1.61869	1.50499	1.81128
	1.65793	0.827875	1.64346	3.49007	1.25205
	3.19764	1.47246	2.34224	2.30931	1.17555
	1.06603	1.95033	2.2179	0.741855	1.9004
	2.56515	1.58205	2.44459	1.82621	2.30939
	1.58171	1.83146	2.88488	1.75103	2.09708
	1.80316	1.43742	2.49444	2.12188	2.98127
	2.20507	0.822797	2.0524	1.6957	1.36505
	1.78614	2.66104	1.97802	2.90414	1.29658
	2.35755	1.42974	2.35731	1.79864	1.96113
	1.16493	1.30437	2.39322	2.13608	1.46886
	1.75823	2.10204	1.74645	1.66087	2.32068
	1.23629	2.42905	2.04144	1.37268	1.72524
	2.25639	1.2192	1.84117	2.59597	2.29342
	1.81885	2.51385	3.17968	1.15085	1.94694
	2.16893	0.996297	1.34443	1.38032	1.7887
	1.94388	1.63724	2.64832	1.43785	1.33309
	1.54289	1.34425	2.21127	1.69969	1.8103
	1.685	2.78824	2.807	1.24816	2.53691
	1.2869	1.31604	2.6881	1.51338	1.05871
	1.85929	2.37646	1.37174	1.36969	1.18802
	2.27182	2.13741	1.95959	1.60524	1.37645
	2.22311	1.94306	3.46661	1.82103	2.07965
	1.63363	2.33326	2.91378	1.2387	1.16472
	1.4338	1.67162	1.9996	2.03885	1.83777
	1.51494	2.15861	2.43739	1.85271	1.02588
	2.046	1.17096	2.28546	1.94092	1.08014
	2.3259	0.893639	1.94894	1.87837	1.99868
	1.62362	1.19542	1.67018	1.26018	1.32597
	2.11405	2.28025	2.01022	1.59684	2.09883
	1.5735	1.05467	2.81258	1.61562	1.80313
	2.31607	1.52931	2.33429	1.87207	1.28777
	1.73829	1.88815	1.84282	1.46065	1.95957
	2.64584	2.36586	2.42102	0.818608	1.33153
	1.68358	1.99731	1.7235	1.65711	0.810253
	1.81686	3.21585	2.18367	2.26591	1.3058
	2.14804	2.06851	2.30119	1.67568	2.14742
	1.67445	1.66772	1.94333	1.25075	1.43932
	2.00207	1.73296	2.00749	2.79889	1.11591
	1.82534	1.79663	1.53608	1.45174	1.05744
	1.35135	1.50493	3.18753	1.31398	1.63843
	1.98256	1.42193	2.18866	1.63581	1.77748
	2.72955	1.8087	1.76755	1.17996	1.87444
	1.63597	2.42479	2.91212	2.33097	1.77145
	1.7232	2.24516	2.41233	0.878379	2.21187
	2.64171	2.05775	2.42871	1.97793	1.45251
	1.93128	2.43189	2.99894	1.61858	2.24591
	1.74017	1.19539	2.49935	1.43449	1.20189
	1.71189	1.65085	2.46627	1.44608	2.17087
	2.6014	1.79547	2.10755	1.9308	0.847755
	1.65904	1.38498	1.21587	1.27868	0.937947
	1.37475	1.53263	1.78194	1.04689	2.10572
	2.08096	1.02179	2.1339	0.908012	1.80249
	1.94361	1.03422	2.11847	1.19867	1.51018
	3.85144	2.64544	1.55995	1.25897	1.78751
	1.56317	1.37121	2.10028	2.01173	1.86604
	1.95491	1.9682	1.53738	1.65107	1.35198
	1.65331	0.667135	1.53711	1.43246	1.29312
	1.03731	1.35924	1.26569	2.12038	1.97261
	2.15215	1.47585	2.09952	2.37145	0.91176
	2.82402	2.4211	1.88666	1.60833	1.10676
	1.96654	1.3792	2.38441	1.40183	1.46041
	1.97376	2.16304	2.40101	1.65529	1.34701
	1.43367	1.99308	2.91994	1.24846	1.07134
	1.76579	1.25787	1.34585	0.451534	0.741597
	1.78797	0.925312	2.14387	2.09599	1.53373
	1.90735	2.4092	2.6801	1.5318	1.15662
	2.39524	1.71101	1.15292	1.51908	1.84083
	2.3021	2.01559	1.26592	1.74341	2.17502
	1.5923	1.24755	1.6337	0.882648	1.48296
	3.33567	0.91371	2.99107	0.535262	1.68782
	2.92136	1.17116	1.50134	0.848463	2.10872
	3.00569	0.675948	1.54402	1.83859	0.977682
	2.31632	1.39515	1.11	1.43858	1.18067
	1.55251	1.35026	2.14615	1.19323	1.96451
	2.41494	1.41725	1.83373	1.46515	1.94647
	2.50329	0.967454	1.47325	0.961295	1.47025
	2.25019	2.20036	2.6965	1.5282	1.02995
	1.72888	1.22998	1.77769	1.1726	2.00752
	2.10293	2.02581	2.1054	1.86316	0.966821
	3.08399	2.18652	2.17002	0.857299	1.32079
	1.10851	0.919744	1.99523	1.93433	1.40822
	2.28403	1.04867	1.72008	1.01409	1.48384
	2.01455	1.45631	2.42703	1.42559	2.19481
	1.28747	1.47818	2.83924	1.79953	1.71362
	2.25434	2.26193	1.85608	2.02964	1.05433
	1.89456	1.02363	1.15041	0.925173	2.08897
	2.03529	2.24454	1.87662	1.5591	1.45289
	1.67369	2.03897	1.82118	1.26237	1.12231
	2.11795	0.748876	3.18848	1.52064	0.717685
	1.44762	1.34549	3.09377	1.32657	0.847019
	1.39281	1.53357	2.25051	1.18223	0.658193
	2.21722	1.74368	4.22289	1.63532	2.2696
	2.22356	1.39916	2.52314	1.79965	3.077
	1.95656	0.87274	2.47632	1.83574	2.54108
	2.32422	0.741093	2.24505	1.55529	1.28904
	2.39102	1.77887	1.95094	1.66791	1.44598
	2.11876	2.05195	2.36411	0.94194	2.23509
	2.88657	2.16025	1.55823	1.97239	2.27913
	1.76992	2.03996	1.63133	2.36191	1.52846
	1.54314	2.41603	1.0484	1.17937	1.61816
	2.30004	1.02212	1.86953	2.58126	1.21967
	3.18381	2.38972	2.86208	0.993324	1.72197
	1.87886	1.37037	2.60828	1.50619	1.26499
	2.15281	2.0663	2.53813	1.22406	1.08281
	1.73894	2.26719	2.33424	1.55574	1.67819
	3.35058	2.11168	3.30647	1.34268	1.65707
	1.80444	2.00552	2.51592	1.2142	2.06749
	1.80759	2.37211	2.77299	1.29893	1.89443
	2.39763	1.59939	1.90065	1.75647	1.15813
	2.29779	2.10478	1.56421	1.94642	1.54587
	2.10602	1.54151	1.45925	1.49823	1.2218
	1.78348	1.28267	2.10965	1.10009	1.45576
	1.48692	2.18298	1.56512	1.80168	1.26937
	1.58885	1.29169	2.35718	2.01044	1.71784
	1.58734	1.4337	2.4481	0.995163	1.34592
	1.95613	1.69921	2.96535	1.2841	1.9574
	1.37194	1.84193	1.92227	0.969244	0.606553
	2.25055	2.50655	2.69513	1.3348	1.88315
	2.37682	1.53035	3.72972	1.10133	1.38591
	1.71304	2.24917	1.56832	0.967082	2.96455
	2.46495	1.23708	2.04358	1.92466	1.46644
	1.00136	2.85322	1.91032	1.90562	0.91904
	3.03416	1.91801	1.18029	1.76494	2.02859
	2.42804	2.0494	1.70392	1.80144	1.93245
	2.68773	2.12218	1.4606	0.997422	1.36854
	2.0225	1.69207	0.830025	2.1267	1.58367
	2.26541	2.18791	1.83889	2.04786	2.04551
	2.47035	1.5273	1.78983	1.62182	1.50512
	2.06943	2.89725	2.2354	1.61319	1.07159
	1.58717	2.28414	1.09376	0.884932	1.88557
	2.66401	1.79836	1.14813	0.952548	2.48285
	1.87304	1.68254	1.82886	1.1519	1.25692
	2.23284	1.56397	0.886377	1.5184	1.07506
	2.03536	2.42009	1.94087	1.24858	2.34962
	2.52386	3.31353	2.70449	1.9735	2.01017
	1.68329	1.52679	2.29591	1.65119	1.40463
	2.75757	2.3817	1.59033	1.38545	1.92481
	2.81336	1.85041	2.46804	2.51731	1.37278
	1.83565	2.37386	1.87484	1.64452	1.31614
	1.87173	2.29045	1.51173	1.14753	1.18283
	3.15298	2.89494	1.33707	1.91774	1.67177
	2.75635	2.01342	2.08738	1.38306	1.38864
	1.75876	2.92	2.82287	1.7565	1.36716
	1.779	2.02845	0.954605	1.66192	0.993122
	1.06167	1.36791	0.865954	1.23618	1.08348
	0.709651	2.76735	1.58994	1.14545	2.30784
	1.27757	1.97139	1.3261	1.5923	1.2394
	2.0894	2.18505	1.39258	1.41962	2.08611
	1.55734	2.04718	0.891974	2.11118	1.33621
	1.5532	2.33508	1.20571	0.723136	1.99901
	1.71017	3.46904	1.37898	1.5926	0.883199
	1.32388	1.76376	1.28343	0.867687	1.38874
	1.72339	1.93917	3.33297	0.804253	1.17342
	0.930086	2.4286	2.95093	1.6295	1.54678
	1.52926	3.77815	1.57692	1.81255	1.19631
	1.43714	3.25989	1.00816	2.26838	2.088
	1.08695	3.03589	1.75533	1.20143	1.8115
	1.00322	3.01501	2.06883	1.52466	0.82226
	1.24406	2.66171	3.01281	1.43982	0.93252
	1.68099	2.0184	1.87772	1.40061	2.5372
	1.7314	1.82732	1.72771	1.56986	1.98375
	1.23418	2.22399	1.37166	1.5169	2.56611
	1.06157	1.78655	1.33444	1.32118	0.837492
	1.52392	1.65682	1.0403	1.99893	1.38605
	0.883422	1.79252	1.73325	2.17076	1.98373
	1.70677	1.88011	1.99409	2.42448	2.31793
	1.21079	1.83888	1.60116	0.982606	1.35809
	1.06321	1.70872	1.74583	1.00305	2.53775
	1.37967	1.97435	1.56093	1.4084	1.83146
	1.60224	2.90212	0.961478	1.67329	1.4105
	1.08681	1.93734	1.05315	1.80474	1.63258
	1.24189	2.62209	1.37214	1.63789	1.80663
	1.94376	1.59592	0.914113	1.65011	1.83259
	1.70236	1.59106	0.828611	0.556088	1.71528
	2.73679	1.77192	2.60237	2.07057	0.820046
	1.64656	2.00559	1.10055	1.97257	2.18259
	3.48818	2.49024	1.87623	1.96073	1.41358
	1.52285	2.12371	1.58943	2.03951	1.23687
	1.47789	1.93027	1.62285	1.02082	1.98146
	1.24934	1.91465	1.58976	1.59749	2.35274
	1.80282	2.36129	1.58303	1.51032	0.994244
	1.46294	2.02278	0.793515	1.32448	1.39785
	1.69434	2.00545	1.05473	1.52508	2.79549
	1.82658	1.60213	1.67137	1.31236	1.25212
	1.32128	1.69761	1.08736	2.69706	3.29092
	0.971265	0.890818	1.29277	1.33841	2.06032
	2.10064	1.92787	0.966452	1.44854	1.69502
	1.53073	2.27054	1.85915	1.47567	1.89692
	1.6347	1.85229	2.04553	1.84081	1.70428
	1.25153	1.90259	2.3421	1.48247	1.84725
	1.66573	1.95971	1.51219	1.2359	1.55734
	1.46565	2.64579	1.1935	1.20935	2.76215
	1.25459	1.94568	2.72034	1.51417	1.99197
	2.86173	1.84524	1.68031	1.86046	1.93875
	1.38513	1.49724		1.75537	2.4135
	1.1342	2.0328		1.51625	1.89191
	1.33101	1.55015		1.20479	2.08059
	1.40512	2.33542		1.48714	1.30149
		2.24447		1.91465	2.67391
		2.12164		2.72438	2.13227
		1.36133		0.84211	1.63984
		2.11066		1.61727	1.96095
		1.51529		1.18911	1.49987
		1.16686		1.03149	2.09539
		2.331		1.89109	1.44213
		1.82029		0.769484	1.89131
		2.47814		2.19362	2.4463
		1.51606		3.97644	1.41859
		2.16261		1.56589	2.64444
		1.47901		1.73001	2.34389
		2.91053		2.83559	1.4953
		1.53189		1.37988	1.71938
		2.2896		0.669707	2.00822
		2.23185		1.43419	2.09432
		2.9037		1.47253	2.23424
		2.41786		2.32868	1.7257
		2.22888		0.735884	2.20196
		2.93484		0.610138	1.56821
		1.81125		1.23885	1.45684
		2.24432		0.593064	1.83204
		2.54911		1.46165	2.05341
		2.92601		1.53981	1.22208
		1.55544		2.13127	1.70911
		1.57799		1.0851	1.85197
		2.37833		1.88908	1.97067
		2.26663		2.4714	1.57729
		1.85511		1.27583	1.87288
		1.60598		0.832338	2.66496
		1.75239		1.23226	1.61036
		1.18938		1.3457	2.43303
		2.05316		1.08237	2.9841
		2.08771		1.86443	2.60146
		2.19089		2.07177	1.78825
		1.58072		1.91216	1.96758
		1.75599		2.75439	1.77008
		2.88092		1.31332	1.86994
		2.4763		0.956679	1.16492
		3.24308		1.43305	1.84136
		2.59468		1.35795	2.95777
		2.18299		1.25619	1.38607
		1.9931		1.67591	1.65397
		1.26289		1.74697	2.07418
		1.9631		1.28362	1.62784
		3.14953		1.6748	2.32153
		1.87291		1.4184	1.43184
		1.59963		1.12591	1.78113
		1.81137		1.06829	1.81536
		2.32652		1.92615	2.28554
		2.63208			2.31767
		2.21067			2.10895
		2.49788			3.17943
		2.76569			1.507
		2.4528			3.79904
		1.99535			1.18896
		2.48122			1.31376
		2.89845			1.1804
		2.28617			1.8058
		1.64877			2.56747
		1.28591			1.72558
		1.63306			1.99285
		2.23054			1.82348
		2.3974			1.59601
		1.56088			1.20446
		1.85846			2.73032
		1.28595			2.03692
		1.99797			1.95718
		2.48598			1.3681
		2.08161			3.39189
		2.01745			4.35261
		1.85517			1.71205
		2.36695			1.44689
		2.89699			1.89871
		1.27883			2.55737
		1.78628			1.7086
		2.04469			1.22144
		1.19193			1.64728
		2.02172			2.19717
		2.46171			2.07157
		1.46919			0.855334
		2.52863			1.91131
		1.66322			0.535262
		1.47619			2.49683
		2.42785			1.76957
		1.95918			1.84648
		1.87984			2.5661
		1.54321			1.41886
		1.74718			2.69327
		1.1841			2.33761
		2.24085			2.2528
		2.17265			1.47124
		2.40945			1.18678
		1.86571			1.74832
		1.93859			1.5308
		1.80447			2.58133
		1.80801			2.10196
		2.83085			1.64082
		1.86235			2.08378
		1.69988			1.31535
		1.4331			2.0694
		2.19227			2.17733
		3.38857			1.18038
		1.95086			2.62222
		0.97363			1.37973
		1.14971			2.40845
		2.19816			3.38306
		1.81876			1.52989
		1.42499			1.35955
		0.916844			1.18166
		1.84947			1.66086
		1.72302			1.41563
		2.01518			2.0789
		2.90825			2.06409
		3.31474			1.82056
		2.6333			2.04839
		1.8866			2.23545
		1.28693			2.59658
		2.79332			2.29602
		2.36459			1.23777
		1.46398			1.59052
		0.880781			1.46681
		3.7401			2.10635
		1.97894			1.81906
		3.14221			2.20299
		2.84345			1.49645
		2.79537			3.18707
		1.76208			1.82812
		2.30656			2.43771
		2.24426			1.7884
		1.91878			2.28833
		1.71789			1.75504
		1.91817			1.58591
		2.18969			1.928
		1.50349			1.46002
		1.54144			1.65509
		1.62212			2.3292
		1.88443			1.6819
		2.55531			2.27678
		1.65598			1.32996
		2.70576			1.32873
		1.9474			1.35138
		1.49229			1.88595
		3.40069			1.36397
		2.30685			1.58407
		1.3818			1.54023
		2.66563			2.32573
		0.797669			1.83191
		2.32338			1.58654
		1.38383			2.1978
		2.33822			1.26989
		2.56593			2.73041
		1.74344			1.02492
		2.1061			2.17158
		2.05463			1.70273
		1.97131			2.27518
		2.2679			1.86901
		3.05895			2.76357
		2.3381			1.57649
		1.62163			1.73442
		2.4667			2.3853
		2.41656			1.57396
		2.98237			3.02408
		1.3371			2.78925
		1.01667			3.44718
		2.46395			2.62255
		2.3469			2.03843
		2.09938			2.28148
		2.33499			1.79739
		2.33401			1.43583
		2.84926			1.83044
		1.79233			1.92051
		1.19367			2.59015
		1.3291			1.66296
		1.00132			1.98849
		1.52735			1.73497
		3.33474			1.56783
		1.59927			1.98628
		1.51945			2.80243
		1.8618			1.64954
		2.41043			2.0313
		1.66226			1.99397
		1.06371			2.13866
		2.41308			2.42162
		1.9841			3.32884
		1.49386			2.85333
		1.62169			2.51278
		1.84222			2.42008
		1.94552			2.00461
		1.66361			2.642
		1.91314			3.77833
		1.66545			2.25391
		2.16918			1.9174
		1.71141			2.44608
		1.30476			0.963654
		1.49711			2.11553
		1.50314			1.85385
		1.67784			1.29333
		0.95229			2.20755
		1.51868			3.09198
		2.0007			2.62155
		3.06267			1.74183
		2.01071			2.61927
		1.69283			1.57893
		1.91746			1.68474
		2.08105			2.39753
		1.29375			1.46969
		1.67685			1.67421
		1.87844			1.60072
		0.593064			1.73901
		1.78097			3.80611
		2.12556			1.71219
		1.02075			2.55485
		1.57273			3.51248
		1.3017			2.2206
		1.62944			1.39998
		1.20366			1.75565
		1.64182			3.54185
		2.3918			3.37366
		1.38123			3.00113
		2.31648			0.766207
		1.52454			1.892
		1.60445			2.53957
		0.604408			1.27983
		1.61243			2.78101
		1.30805			1.31717
		1.88621			1.57729
		2.74562			2.487
		1.66239			2.7893
		2.36196			2.00872
		1.53129			1.67866
		0.974759			1.55078
		0.932485			3.21487
		2.68069			2.73928
		1.51094			2.30471
		1.00493			2.41476
		1.41674			1.67755
		1.71812			2.12297
		2.3255			2.84084
		1.42363			1.40583
		1.87109			2.40343
		2.97479			2.01058
		1.62798			2.02315
		1.69694			1.43075
		1.90708			1.9141
		2.42422			2.78828
		1.68717			2.58313
		2.00306			1.29811
		1.51098			1.34941
		2.59919			2.12453
		1.25806			2.40938
		1.73037			2.29253
		1.62853			1.70412
		1.17738			2.45098
		2.08863			2.91642
		1.40451			1.66622
		1.4528			2.19464
		2.05046			1.19559
		1.33245			1.5582
		2.25464			2.61971
		0.932276			2.30916
		1.66362			3.20404
		1.77682			3.17284
		2.23785			2.87404
		1.59343			2.71114
		2.05636			2.11556
		1.80006			2.57422
		1.3555			2.58664
		2.03673			1.82084
		0.916573			3.55097
		1.30372			1.41245
		2.05933			3.33145
		2.54484			1.1195
		1.14461			2.18522
		2.10645			2.09492
		1.2737			1.44154
		1.52434			2.42299
		1.62021			1.56348
		1.57236			0.962365
		1.51947			1.01227
		1.92794			2.22099
		1.85601			1.35978
		1.51545			2.13203
		1.74815			2.57213
		2.24178			1.38536
		1.33592			2.17573
		1.30283			2.23578
		1.71545			1.78895
		1.17202			2.01692
		1.7423			2.29789
		1.9451			2.05644
		1.21815			2.86791
		2.92501			1.8937
		2.95558			2.04291
		2.7065			2.52266
		2.12351			1.33223
		3.05681			2.2321
		1.49251			1.9444
		0.611417			2.50517
		1.38783			0.839928
		1.43403			1.18152
		1.54156			1.84168
		1.21333			1.64385
		1.77899			2.47753
		1.75874			2.0066
		1.59184			1.25511
		1.68727			2.93445
		1.05596			2.58688
		1.4586			2.54134
		1.71202			4.25394
		2.61164			1.41426
		1.68745			1.88748
		2.52085			1.03973
		1.3749			2.20146
		1.4876			1.70768
		1.45199			2.20164
		1.48218			1.92968
		2.07838			2.12116
		2.55568			1.00339
		1.72216			1.95802
		1.57456			1.54642
		1.80716			2.9851
		1.08914			2.4331
		1.60072			1.77505
		0.981853			2.45297
		1.99551			1.08687
		0.977584			2.19807
		1.52794			1.2694
		1.87943			1.94818
		1.92092			1.16946
		2.00856			1.77772
		1.97691			1.77754
		2.50305			3.33853
		0.930628			1.43694
		1.29465			1.35009
		0.755925			1.51616
		1.55968			3.47516
		1.96502			1.80443
		1.54626			1.74093
		1.30114			1.80133
		1.51268			2.20623
		2.48815			2.5632
		1.62824			1.89944
		2.7709			1.41473
		1.49916			2.30494
		2.54159			1.30714
		2.90084			1.68676
		2.20179			2.97042
		1.63561			1.73926
		2.90366			1.89215
		2.21186			1.75288
		2.54648			1.45536
		1.77408			1.72608
		1.75443			1.80266
		1.25705			3.04345
		1.63169			2.9781
		1.28745			1.31477
		1.51888			2.44941
		1.00123			1.93691
		1.33537			2.15224
		1.83123			1.9285
		1.47215			2.02193
		1.20711			2.09159
		1.38133			2.40109
		2.36979			1.74502
		1.64113			2.94567
		1.69193			1.4109
		1.10244			2.51408
		1.00677			1.95108
		1.21765			1.57009
		1.89408			2.4634
		1.91625			1.37323
		2.26293			1.58619
		2.76894			2.56063
		1.26131			1.62088
		1.36039			1.68354
		1.08777			2.09684
		1.96668			1.4264
		1.45368			2.1822
		2.18904			1.91683
		2.21122			1.12355
		2.01563			2.83277
		1.10526			1.96111
		1.30377			2.07491
		2.93302			1.45636
		1.24398			1.77886
		1.52995			1.39998
		2.64751			1.67561
		2.59857			1.59965
		1.37043			1.80993
		1.20477			1.99725
		0.758068			1.45057
		1.34431			1.50215
		1.15362			1.11601
		1.18344			2.3462
		1.43373			0.536712
		1.56061			1.25013
		1.25771			1.64545
		1.95175			1.94769
		2.40366			1.7289
		1.95681			1.28242
		1.5448			2.45756
		2.2941			1.072
		2.04934			1.52585
		2.71162			0.633405
		2.11701			1.77843
		1.50567			2.05143
		3.30327			1.97901
		1.62861			2.08219
		2.22798			1.29027
		1.79866			2.07233
		2.90881			0.857237
		1.93978			2.5696
		1.1275			2.29031
		2.03561			2.26802
		1.13254			2.44738
		0.530986			2.41922
		0.405512			2.5108
		1.8323			1.14219
		2.66917			1.56059
		1.55605			2.7305
		0.879509			1.25072
		2.14485			2.46015
		2.03025			1.79056
		1.77442			1.38867
		0.849143			2.10689
		0.909316			2.55281
		1.89032			2.61372
		1.21069			2.11307
		1.07068			1.68449
		1.52625			1.85224
		1.74269			2.33733
		1.9342			1.04225
		2.26514			0.881455
		2.55364			1.32027
		0.965471			1.42259
		1.16465			1.5897
		1.00955			1.68292
		2.94914			1.98971
		1.31662			1.46765
		1.66115			1.23199
		2.43171			1.79914
		1.34264			2.46329
		1.15216			1.31045
		1.68815			2.61567
		1.54957			1.43479
		1.12046			1.46105
		3.25641			1.23457
		1.43633			1.60411
		1.2327			2.10581
		2.61181			1.5434
		1.19857			1.86258
		2.1948			2.1618
		2.0419			1.4462
		1.878			1.39483
		1.96953			1.33088
		2.20759			1.65859
		2.26023			1.88499
		1.37039			2.48017
		1.83898			2.14498
		1.45399			2.08183
		2.10149			2.19734
		1.66122			1.98834
		1.18647			2.0637
		1.25257			2.5495
		1.33793			2.65031
		2.93964			2.60679
		1.42206			2.14515
		1.46932			1.7901
		1.5087			1.75539
		1.47395			1.73893
		1.72877			1.476
		2.7192			1.79599
		2.04986			2.23817
		1.53642			3.0511
		1.36889			2.20712
		1.76991			1.22703
		1.46201			1.7867
		2.21999			1.09048
		2.25593			1.79723
		0.825723			1.59492
		1.72815			1.98966
		0.741569			1.75422
		1.14084			2.99153
		2.59598			1.55959
		1.41543			1.62049
		1.56735			0.994962
		1.42298			1.71274
		1.12864			1.17197
		2.21109			1.57701
		1.84708			1.5134
		1.53415			2.25278
		1.27784			1.62478
		1.86757			2.65236
		1.66381			2.70738
		2.04806			1.33476
		2.56965			1.6956
		1.53984			0.964828
		2.68251			1.51436
		1.6059			1.56811
		0.796421			1.74272
		1.45352			0.900433
		1.14183			1.58404
		1.64369			2.53117
		1.9937			1.18051
		0.723			2.66272
		1.68836			1.09484
		1.45305			1.38112
		1.06118			1.31412
		1.24666			1.38873
		1.5417			1.61012
		2.98051			1.51878
		1.55876			2.50644
		2.28054			1.65144
		0.792289			2.34517
		2.01975			2.001
		1.31319			1.51627
		1.71172			1.3653
		1.59939			2.03719
		2.08565			2.15861
		1.5103			1.09141
		1.60269			2.07595
		2.08633			1.47022
		2.31725			1.96748
		1.37326			1.59371
		0.729564			2.26735
		1.40394			1.90908
		2.13403			1.73485
		1.28401			1.4488
		2.08966			1.37671
		0.874987			1.92427
		1.66059			1.8296
		1.51271			1.92989
		1.55021			1.77781
		1.89031			1.2067
		1.75615			2.15366
		1.86844			2.09546
		1.01535			1.81185
		1.82914			1.89731
		1.76201			1.29438
		2.43005			1.70935
		1.82718			1.99473
		1.14552			1.45775
		1.43039			1.46404
		1.65347			1.74985
		1.42273			1.54911
		1.59386			1.56541
		2.04895			1.23172
		1.33886			1.54845
		1.43552			1.58526
		1.82968			1.7245
		1.49891			2.11015
		2.3187			1.94123
		0.750172			1.41694
		1.78319			1.17462
		1.04466			1.76193
		1.62863			1.62119
		1.26533			1.9258
		1.2233			1.82256
		1.80291			1.34584
		1.99817			1.67258
		1.40965			1.2475
		1.63621			2.7653
		2.56395			2.98756
		2.72222			0.607904
		1.47325			2.03871
		1.36147			1.74316
		1.40347			1.34647
		1.62014			2.5997
		1.5052			1.35263
		1.69748			1.44357
		1.18103			1.76107
		1.48864			2.80487
		0.540452			2.30162
		1.39428			1.22337
		0.843532			1.74755
		1.90918			0.94608
		1.05045			1.80766
		1.48962			1.21571
		1.52233			2.23246
		2.18854			1.23315
		0.9593			0.804388
		1.52331			2.09546
		1.27213			2.44736
		0.671684			1.60894
		1.2205			1.67951
		1.57755			1.60489
		2.02834			1.39635
		1.87056			1.05435
		2.21139			2.14153
		1.69263			1.34272
		1.67708			3.09108
		2.39885			1.71992
		1.57685			1.52606
		1.56196			1.7946
		1.35164			1.63448
		1.77327			1.3522
		1.17791			1.41174
		1.61734			1.56545
		0.968791			0.849143
		1.19518			1.26804
		1.94686			1.64375
		1.10751			1.86286
		1.3727			2.95575
		1.70447			3.0441
		1.81242			1.05265
		1.91961			1.16704
		2.23279			1.78305
		1.66977			1.15248
		1.83432			1.86266
		1.55125			0.902455
		1.20574			1.41664
		1.16522			1.39782
		0.790491			2.25748
					1.78542
					0.796661
					1.52749
					1.29983
					1.4688
					1.69232
					1.36738
					2.12991
					1.81608
					1.90541
					2.40095
					1.25956
					1.18424
					2.31075
					1.56441
					1.31367
					2.33028
					1.41706
					1.23089
					1.85118
					1.89114
					1.40864
					2.63757
					1.96717
					1.41969
					0.90488
					3.02787
					1.51184
					2.56387
					1.21035
					1.86252
					1.53007
					1.63883
					1.61098
					1.38834
					2.69801
					0.903237
					0.97672
					2.17996
					1.3874
					1.29525
					0.948097
					1.66125
					1.15986
					1.3996
					1.36042
					1.07967
					1.17049
					2.28638
					1.95308
					0.913205
					1.79204
					0.864168
					1.26529
					1.55866
					1.53916
					0.946951
					1.64407
					1.64044
					1.74538
					1.76162
					1.80066
					1.83102
					0.786071
					2.16625
					1.91799
					1.15444
					1.46086
					1.69
					1.51795
					1.38989
					1.42215
					1.64489
					0.835966
					1.36902
					1.9438
					1.70635
					2.23269
					2.05836
					1.71398
					1.99717
					1.96174
					1.24425
					1.09319
					2.19556
					2.09857
					1.82245
					1.99144
					1.59487
					1.56309
					1.8481
					1.4661
					1.58282
					1.95715
					1.6042
					1.52574
					1.46698
					1.39943
					1.52952
					1.30073
					1.67602
					1.54433
					1.90551
					1.40152
					1.54724
					1.61665
					1.63152
					1.62932
					1.38479
					1.92501
					1.71342
					0.761459
					2.15133
					1.97238
					3.40356
					2.55031
					1.72992
					2.93113
					1.48839
					2.06055
					1.80953
					1.8244
					1.28036
					2.09193
					0.957013
					2.14935
					1.67261
					2.88369
					0.96771
					2.22174
					1.81841
					2.36654
					1.35897
					1.43826
					1.86735
					1.54631
					2.28752
					1.48338
					1.35628
					1.28812
					1.26408
					1.53426
					2.07181
					2.53658
					1.75383
					2.47077
					1.42838
					1.19406
					1.40631
					1.45141
					2.22602
					1.68588
					1.39862
					1.55322
					1.18584
					1.20285
					1.19992
					0.938467
					1.93995
					0.99247
					2.08772
					1.47728
					2.10598
					1.75508
					1.43211
					1.83361
					1.46144
					1.06681
					1.40905
					2.20133
					1.20609
					2.01791
					1.81582
					1.97697
					1.98599
					1.94274
					2.91786
					2.72281
					1.16707
					2.35644
					1.56319
					0.783046
					2.31841
					2.05098
					2.68606
					1.46138
					1.34326
					2.07753
					2.06722
					1.22044
					2.82759
					2.52359
					1.45424
					1.03191
					3.05729
					1.07665
					1.3779
					1.26099
					1.84941
					1.42243
					1.67794
					0.958702
					2.03523
					1.40956
					1.48452
					0.789028
					1.0268
					1.40469
					1.26543
					2.36869
					1.29994
					1.69582
					1.90143
					1.96542
					2.0029
					1.18936
					1.43165
					2.03051
					1.59093
					1.49899
					1.11031
					1.78971
					1.75502
					1.81994
					0.995066
					1.37399
					1.09549
					1.35277

## Sheet: Fig. sup. 3F
percentage of the population in each cell cycle
		P1	P2	P3
	PA + VAN(20)	44.6534	24.3831	30.9636
	PA + VAN(10)	42.6209	24.0458	33.3333
	PA(11)	55.8022	29.7623	14.4355
	VAN(20)	57.5276	35.2901	7.18232
	Control	62.6703	29.0775	8.25224
