# Supplementary material for: Antibiotic-induced accumulation of lipid II synergizes with antimicrobial fatty acids to eradicate bacterial populations
Source: eLife. 2023 Mar 6;12:e80246. doi: 10.7554/eLife.80246 (PMC10030119; doi:10.7554/eLife.80246)
Supplement: Figure 4—figure supplement 4—source data 1. [file elife-80246-fig4-figsupp4-data1.xlsx]

## Sheet: Fig. sup. 4A
30 min cell volume - phase 1
		Control	PA(11)	VAN(20)	PA + VAN(10)	PA + VAN(20)
		0.967659	0.451534	0.57506	1.20129	0.443609
		0.948047	1.23578	0.970579	1.13644	1.82938
		1.05122	1.09972	0.786405	0.935629	1.1246
		0.691843	0.713244	1.14376	1.43348	1.19331
		1.15856	1.25802	2.59309	0.748126	1.02766
		1.32273	1.2314	1.60266	1.61416	0.665068
		0.576446	0.889013	1.12189	0.748887	1.20494
		0.542986	0.985087	1.4224	1.44612	0.740855
		0.927028	0.819405	1.666	1.30525	1.30725
		1.53666	0.856568	0.901244	1.39473	0.664907
		1.34693	0.701843	1.16745	0.874066	0.897328
		1.66731	1.41582	0.517811	1.43643	1.33493
		1.04296	1.06969	2.07925	0.974192	0.681059
		1.95542	1.48472	1.46631	0.75137	0.875954
		0.939153	1.10318	1.91407	1.29153	0.568514
		1.39747	1.19588	1.51616	0.789542	0.896799
		1.58311	1.12798	0.829401	0.89915	1.23815
		1.40136	1.16578	2.41571	1.00581	0.359056
		1.59449	1.28806	1.67057	0.607991	1.11677
		1.14679	1.10745	1.16765	0.589633	0.581176
		0.832269	1.17465	2.03948	1.55936	1.09048
		0.943916	0.815666	2.26466	0.663463	0.629439
		1.00068	1.09333	2.33689	0.826867	1.1775
		0.922253	1.52942	2.31694	0.8648	1.30049
		0.893196	1.29252	2.26336	0.954225	0.568396
		0.868787	1.41779	0.782346	0.791498	0.359056
		1.61904	1.12343	0.497318	0.769573	2.8165
		0.914542	0.825973	1.23575	1.25388	1.31164
		0.75352	0.752648	1.21563	0.795195	1.28291
		1.14012	1.52737	1.33892	0.670818	1.19269
		0.802888	0.812826	1.50914	1.34524	0.897277
		0.753597	0.882548	1.43309	0.949888	0.740792
		1.17861	1.06008	1.73561	1.14695	1.13634
		1.34973	1.14488	1.39011	1.78329	0.90689
		0.66999	1.22305	0.973878	1.24703	0.833574
		1.35279	1.29144	0.600547	0.840203	0.359056
		1.02722	1.14629	1.78134	0.763135	1.1082
		1.10355	1.3811	1.11323	1.19992	0.476971
		0.53786	0.861131	1.94032	1.0936	1.1685
		1.41787	1.21378	1.09749	1.10538	1.21138
		1.04569	0.853512	1.36224	0.724662	1.19579
		1.4932	1.48412	1.00852	0.639096	1.23313
		1.09562	0.602398	1.42527	0.821962	0.628863
		1.45766	1.79629	3.40831	1.36493	0.973692
		0.543323	0.587617	0.939183	1.45197	2.49467
		1.03254	0.758494	1.39799	1.18173	0.948308
		1.03085	1.53516	1.08658	0.527271	1.39577
		1.37878	2.77624	1.35559	1.11556	0.568514
		1.73168	1.11032	1.21259	0.791719	0.696925
		1.37993	1.08535	1.69306	0.707481	0.933114
		1.65967	1.52613	1.17648	0.941536	1.08115
		1.88023	1.64269	0.931707	0.562535	1.32617
		1.14916	1.01555	1.83614	0.98606	0.526617
		1.84275	0.806994	1.00756	0.784787	0.725707
		1.49768	1.39739	2.05312	0.629439	0.359056
		1.58538	0.635608	1.92189	0.759053	1.16101
		0.997199	0.861006	1.59726	1.09069	1.71465
		1.59158	1.32534	1.70029	0.829401	0.976944
		1.18571	1.25516	1.09422	1.56386	1.19153
		1.03035	0.856056	1.48497	1.19826	1.28645
		1.15414	1.09519	0.852699	1.80891	0.944106
		1.13218	1.30561	1.27809	1.48645	0.604115
		1.63335	1.05357	1.65434	0.85847	0.68013
		1.0531	0.451534	2.41559	0.681059	1.28061
		1.60115	0.815123	0.900599	1.08229	0.713431
		1.02866	1.43579	1.198	0.881447	0.862216
		1.03923	1.28706	1.91161	1.22288	0.81077
		1.22254	0.556432	1.27457	0.938244	0.894668
		1.12339	1.11612	1.1761	1.04307	0.451534
		0.785124	0.821217	1.63579	0.779653	1.4712
		0.763994	1.08716	0.63945	1.83052	0.700085
		1.14341	1.86198	1.87651	0.640453	1.13636
		0.501938	1.07903	1.84927	1.43602	0.967866
		1.07156	0.92258	1.37789	0.818608	1.20553
		1.72891	0.497318	0.65688	0.829345	0.743875
		1.07384	0.405512	1.95307	0.954414	0.881243
		1.03384	1.06482	0.514169	1.4302	0.593064
		1.28038	0.654579	1.31723	1.2319	1.25612
		2.6687	0.830901	1.56172	0.554457	1.21342
		1.10232	1.61297	1.35818	0.559207	1.0314
		1.02302	1.13734	1.08344	1.39312	0.779349
		1.10173	1.04324	1.71791	1.06549	1.00296
		2.59334	1.54343	1.59303	1.36823	1.05756
		1.82599	0.922846	2.17848	1.18467	0.750222
		1.13968	1.6341	1.45188	0.716897	0.889744
		0.873569	1.08652	1.45435	1.14983	1.27841
		1.05764	1.1544	1.70889	1.17259	1.1025
		0.81123	1.32962	1.77854	0.405512	0.731544
		1.15838	1.33863	1.77242	1.11323	1.11104
		1.86967	0.588612	0.980974	0.767819	0.64643
		1.31855	0.948047	1.53842	1.11395	1.33916
		1.24598	0.924348	1.63549	1.08834	0.868108
		1.54341	1.03115	2.12152	0.501938	1.58802
		1.4669	1.43011	0.971103	1.12557	0.800004
		1.19497	0.744129	0.929007	0.653155	0.666887
		1.22441	1.07902	1.40515	1.57401	1.375
		0.792544	1.1291	2.09634	0.584171	0.796421
		0.731772	1.70709	1.8246	1.23106	0.502535
		1.51089	0.864469	1.41579	0.663824	0.64144
		1.8823	0.977711	1.81989	0.713924	1.13934
		1.39647	1.1402	1.46147	0.727271	2.24292
		1.14234	0.826938	1.46886	0.793654	0.859791
		1.35186	1.27867	1.48539	1.42165	0.835027
		1.08092	1.16777	2.27824	1.3489	0.863552
		1.17351	1.57051	1.45779	1.01816	1.40473
		1.36252	1.30274	0.883078	0.835966	1.38634
		0.962411	0.844429	1.55654	0.775277	1.0151
		1.29926	0.968604	1.26266	0.86351	0.865785
		0.981376	1.41076	1.64484	0.772726	1.20488
		1.18754	1.81618	0.824363	1.23212	0.931285
		1.83314	0.792955	1.67088	1.30758	0.627496
		1.7563	1.16844	1.41992	0.463193	1.20924
		1.18872	1.28681	0.554457	1.38869	1.0714
		1.38875	1.02741	1.93023	0.359056	1.03365
		1.63125	0.885346	1.50812	1.0095	0.806955
		1.1287	0.741007	2.47666	1.03229	1.36762
		1.13481	0.904258	1.58732	0.911216	0.715605
		1.89411	0.911911	1.00737	0.800511	1.27106
		0.97742	0.576629	1.58614	0.822865	0.705101
		1.59395	1.04844	2.12381	1.06282	0.359056
		1.7709	0.669094	1.64722	1.01461	1.37391
		1.36094	1.37687	0.735095	1.24277	1.97689
		1.54019	1.88594	2.36123	0.913599	0.782273
		1.33072	1.2443	1.46607	1.31816	1.12595
		1.4018	1.08373	2.11026	1.47052	0.761029
		0.576224	1.04989	2.15722	1.01603	1.36144
		1.26079	1.39715	1.73072	1.17917	0.642995
		2.09012	1.1054	2.05828	1.03887	0.4701
		0.774786	0.99691	0.750486	0.764449	1.17354
		1.38742	1.84431	1.88546	1.41718	0.821485
		1.12172	1.25968	1.82143	1.28882	1.0494
		1.00955	1.01144	0.961468	1.44054	1.0133
		0.976093	0.921425	1.74376	1.00193	0.960506
		1.02615	1.40578	2.091	0.527271	0.540452
		0.937033	1.13223	0.64144	0.829775	0.882523
		0.827724	1.33232	1.26795	0.862912	0.802414
		0.536712	0.924029	1.72555	0.608945	0.896588
		1.19736	1.75817	2.24119	0.75836	1.18
		1.39739	0.816395	0.753001	0.632765	0.969583
		1.49483	1.37129	1.64139	0.501938	0.740855
		1.29092	1.42313	1.92015	0.835707	1.01844
		1.38675	1.38698	1.50086	0.89276	0.882364
		1.12354	0.635608	1.42449	0.536712	1.20924
		0.884932	0.802629	1.26941	0.556088	1.16869
		0.654231	1.03515	1.03522	0.710039	1.10112
		1.42846	1.54186	1.10507	1.08352	0.810131
		0.920837	1.01955	1.39958	0.664907	1.17477
		1.07251	1.15736	1.17058	1.10407	0.903426
		1.63715	2.06422	1.15329	0.892251	1.08409
		0.793539	1.48614	1.69016	0.799294	1.25161
		1.12838	0.965392	1.16182	0.776242	0.741093
		1.31011	1.25368	1.47079	0.814311	1.26737
		1.05271	0.359056	1.22599	0.581414	0.661344
		0.768423	1.17111	1.48718	1.13144	1.17837
		1.15604	1.34611	1.75429	1.36092	0.761809
		0.999823	1.61998	1.29923	1.42292	0.758494
		1.42134	1.11382	0.91208	0.405512	1.0057
		1.50673	1.14579	2.19545	0.690502	0.973973
		1.5009	1.78482	1.46682	1.13763	0.843101
		1.16277	1.21386	1.60934	1.62065	0.584328
		1.02143	0.860208	0.451534	0.92273	1.07738
		0.997199	1.8936	1.18559	0.777041	1.2254
		1.02749	0.709214	1.54924	1.11895	1.01328
		1.28644	1.16432	1.83212	1.12335	0.646413
		1.49003	1.34326	1.71151	1.04887	1.13837
		1.2532	1.54604	2.63953	0.405512	1.3866
		1.14126	0.793539	1.46599	0.593064	1.28151
		1.43727	0.600547	2.17649	0.843641	0.463193
		0.924577	1.27654	1.38319	0.937239	0.501331
		1.07943	1.02198	1.53262	1.09715	0.794303
		0.924625	1.13288	1.36786	1.12888	0.983349
		0.733039	0.920483	0.893232	0.894904	0.893636
		1.59941	1.08541	1.13956	1.06277	1.15477
		1.79484	0.632936	1.03199	1.01747	1.09939
		1.9764	1.12256	0.787387	0.6832	1.11105
		1.30063	1.31465	1.17172	0.923462	0.463193
		1.91991	0.847929	1.35713	1.52337	1.69105
		1.3262	0.7579	1.39531	0.632765	1.1023
		0.872136	1.19517	1.65927	1.02658	1.06
		1.0447	1.08473	1.17962	1.03472	1.08546
		1.22359	0.882782	2.25969	1.1739	2.01154
		1.19698	1.01074	2.19026	1.10516	0.760385
		1.11999	1.32307	1.34487	1.20718	0.661344
		1.34544	0.951356	1.18902	1.77561	0.939554
		0.938236	0.957166	1.31131	1.0744	1.49632
		1.29752	1.50466	2.05362	1.45884	0.996907
		1.68627	0.94696	1.65035	1.65824	1.19895
		0.651474	1.66667	0.514169	1.20098	1.53014
		0.779811	0.458476	1.24433	1.2495	1.10099
		1.85322	1.38792	1.00778	0.829401	1.32377
		1.72805	0.793376	2.20954	0.73995	1.02049
		1.51594	0.980039	1.73941	0.833982	1.18528
		1.74451	0.614663	3.2703	0.966058	1.71454
		1.15484	0.920926	2.24422	1.0812	1.1673
		1.12494	1.50387	2.49952	0.757573	0.96061
		1.40258	0.677366	1.51186	0.772675	0.888049
		1.07543	1.59262	1.61134	1.221	1.26803
		0.979524	1.40657	0.797265	0.895532	0.984572
		1.14873	1.1508	2.13811	0.501938	0.359056
		1.10572	1.33488	1.81915	1.18599	0.892807
		0.700251	0.907458	1.46222	0.501938	0.901005
		1.18414	1.7271	1.72448	0.526617	1.441
		1.51246	1.0617	1.85599	0.804714	1.01216
		1.25738	0.894948	1.29849	0.871883	1.0832
		0.890925	1.28747	2.08664	0.830207	1.60991
		1.32747	0.832745	1.74607	0.752371	0.9775
		1.65064	1.26823	1.29943	1.12766	1.18146
		1.21587	1.37941	1.57946	0.754157	0.927353
		0.768343	1.20661	2.24063	1.47861	1.25528
		0.922744	1.20512	1.90464	1.17098	0.692283
		1.37126	0.584171	1.49303	0.608945	0.845095
		1.23425	0.840766	1.38308	0.853398	0.930648
		0.918725	0.971886	0.576629	0.489271	0.744741
		1.33674	1.11985	2.2221	1.27686	2.0158
		1.49428	1.35559	1.08348	0.796499	0.735212
		1.1249	0.722924	0.654904	1.14112	0.842779
		1.23466	1.17807	1.42504	0.622337	0.895697
		1.21235	1.72316	0.690021	0.758441	0.501713
		1.00013	0.728707	1.81202	1.50126	0.949888
		0.998218	1.08481	0.963015	1.13794	0.903559
		1.52588	0.649907	0.359056	1.34042	0.807207
		1.16586	2.40109	0.598018	1.0074	0.593064
		0.584171	1.54795	1.80343	1.1216	0.810399
		1.61028	0.639096	1.63496	0.847105	0.737425
		1.25898	0.687564	1.73527	0.963831	0.359056
		1.51438	1.21371	2.11173	1.50666	0.639778
		1.16858	0.841602	1.47429	0.648403	0.798746
		1.47091	1.05373	2.09358	1.16454	0.710445
		1.33175	0.977237	2.38282	0.794576	1.01301
		1.16029	0.595236	1.87646	1.25121	1.4298
		1.28379	1.3702	2.49273	0.664546	0.942408
		1.19366	0.627687	1.6436	0.566287	0.821372
		0.851398	0.568396	1.28248	1.51909	0.663584
		0.522311	0.831941	0.792106	0.764926	0.999834
		1.40218	1.02101	1.99061	0.520027	0.962017
		1.10745	1.11805	1.08027	0.600547	1.26376
		1.00136	0.619549	2.09888	0.501938	0.937875
		1.42911	0.982928	0.971886	0.872136	0.805453
		1.22162	1.20894	1.76569	1.15284	2.37458
		1.04208	0.359056	0.94085	0.96325	1.18835
		1.35058	0.4701	1.5093	0.856136	0.725558
		1.34812	0.94514	1.58892	0.853058	1.18698
		1.04343	1.27442	1.1148	0.864399	1.07561
		1.1726	0.78072	1.1378	1.52877	0.558262
		0.883628	1.23911	2.75569	0.910896	1.51193
		0.627496	0.807798	1.53775	1.21437	1.01371
		0.958478	0.929445	1.71211	0.8049	0.973008
		1.01833	0.661067	1.39463	1.37284	0.908029
		0.85847	0.746357	1.18115	1.49756	1.10862
		1.24775	1.29145	1.62563	0.71724	1.09835
		1.14134	1.64893	2.16948	0.4701	0.943377
		0.773079	0.882571	1.11489	0.742348	0.887541
		0.965304	1.40094	1.51396	0.980848	0.686488
		1.48992	1.31213	1.56604	1.19192	0.698307
		1.8252	0.988379	2.82983	1.45575	0.950714
		1.15515	1.04163	1.54169	1.33558	0.623327
		1.36807	1.0151	1.27585	0.839227	1.19361
		1.44712	1.0579	1.61612	0.713924	0.955714
		0.990307	0.897718	1.46515	0.730047	0.697161
		0.750308	1.15836	2.01936	0.842303	0.748126
		0.905688	0.762679	1.5024	0.704344	1.2445
		1.26276	1.15104	1.3337	0.63366	0.957613
		1.49581	1.04547	1.75968	0.792106	0.540452
		1.07824	1.23736	1.6821	0.850534	1.8201
		0.957783	0.876817	2.19175	0.565221	1.41924
		0.965215	0.987524	1.41197	1.24131	0.741855
		1.68516	0.664393	1.59924	1.40996	0.809618
		0.795601	0.960636	1.77258	0.679099	1.39212
		0.691105	1.34334	1.49835	0.887583	0.663584
		0.848209	1.35078	1.84151	1.20785	1.02088
		1.55683	1.34259	1.11751	0.540452	0.734905
		1.20044	1.24696	2.04089	1.72728	1.75029
		1.16243	1.31747	0.789396	0.64643	1.02101
		0.92954	0.950016	2.22392	0.831874	1.29533
		1.93349	0.765736	1.53415	0.792106	1.54541
		0.63945	1.05002	0.682225	0.976471	1.17363
		0.544261	1.03452	1.61383	0.937246	0.89592
		1.02147	1.47665	1.45776	0.654231	0.880756
		1.18901	0.952461	2.10857	0.739265	0.88629
		1.38783	1.21575	1.09289	0.753597	0.753451
		0.928811	0.958659	1.88305	0.957325	1.23382
		1.29027	1.39246	1.78452	0.671684	1.17928
		1.04918	1.67102	1.32386	0.930939	1.09486
		1.09739	0.789695	1.40099	0.593064	1.19722
		0.800197	0.359056	1.74803	1.38672	1.13102
		1.08758	1.03819	0.833671	0.796421	1.25697
		1.0438	0.873569	1.07134	0.89276	1.08404
		1.33629	0.827724	1.1853	0.847929	1.3265
		1.56527	0.912113	1.26767	0.795684	0.731906
		0.954159	2.55034	1.23129	1.66971	0.760385
		0.778428	0.810475	1.39355	0.675948	1.00038
		2.07006	1.25853	1.23301	0.948157	0.744741
		1.02569	0.847929	1.40642	0.405512	1.38191
		1.10054	1.03357	1.20736	0.536712	1.0523
		1.01038	1.20843	0.762301	0.405512	1.38296
		1.02278	0.71575	1.12582	0.607991	0.861553
		1.16219	1.2392	1.57525	1.12803	0.634643
		0.620527	1.03751	1.69472	0.827724	0.6524
		1.06296	0.874921	0.983185	1.03414	1.20165
		0.653938	0.979001	1.46065	1.19434	0.950162
		1.47623	1.25153	1.55384	1.28096	0.595236
		1.3574	1.17191	2.39833	1.01461	1.11303
		0.713288	0.945343	2.26131	0.716575	1.16457
		1.28432	1.04757	1.744	0.451534	0.707502
		1.56499	1.57195	1.17287	0.653127	1.49647
		1.09141	0.635322	2.38066	0.630682	0.603781
		1.02952	1.28287	2.57093	0.621972	0.821217
		1.11429	1.51663	2.51954	0.405512	0.780295
		0.723989	1.22046	2.31202	1.08695	1.43257
		0.920612	0.900038	1.67731	1.55667	0.559225
		1.17208	1.13032	1.67649	1.0723	1.3519
		0.63366	0.889479	0.497318	0.681059	1.06034
		0.691843	0.915234	1.53519	0.632765	1.27479
		1.35503	0.864385	1.68528	0.63366	1.3296
		1.66258	1.29651	2.70097	0.968928	0.709409
		0.941388	1.14844	0.497318	0.919652	1.17266
		0.635322	1.23369	2.93231	0.977875	0.359056
		0.639778	1.83062	0.608945	0.954625	0.405512
		0.818936	1.31325	2.09531	1.01796	0.581414
		0.826246	1.04633	0.764582	0.861006	1.02341
		0.861746	0.726656	0.608945	0.405512	1.03734
		1.70957	1.07601	1.97239	0.934458	0.753323
		0.695488	0.502535	1.88372	0.587617	1.28408
		0.780936	0.860053	0.559364	0.733039	0.715375
		1.96491	1.94197	1.39007	0.798454	0.943654
		0.848209	0.892797	2.35241	0.775453	1.57455
		1.34331	1.38681	1.91829	0.789028	1.31614
		0.723691	2.10366	1.98371	0.654231	0.951722
		1.10333	1.74095	1.72019	1.03751	1.2339
		1.58331	0.965895	0.807945	0.739485	0.94791
		1.04254	1.43217	1.4498	1.08406	0.554457
		2.00064	1.11348	2.30064	1.39361	1.13563
		0.896687	0.585678	0.538538	0.990517	1.18206
		1.78832	0.845965	2.19113	0.84977	1.24968
		0.735095	0.71575	2.189	1.28545	1.09469
		0.737307	1.0233	2.16532		0.501331
		1.30631	0.83999	2.07459		0.974704
		1.51281	1.31976	1.59985		0.704777
		1.43281	0.768981	1.50367		0.854217
		1.26734	0.359056	0.576174		1.14026
		1.05822	1.78469	0.559207		0.359056
		1.06693	0.924703	1.52471		0.78182
		0.532181	0.980792	2.3991		1.06881
		0.824263	1.19201	0.489271		0.893746
		1.31268	1.03883	1.7198		1.45632
		1.448	1.51154	1.91481		1.0166
		1.20686	0.405512	1.08773		1.76747
		1.36411	1.02955	2.37975		1.02575
		0.838948	1.16334	2.58939		1.26048
		1.37151	0.935975	1.40938		1.43712
		0.780693	1.08455	0.9925		1.20056
		0.888734	0.789706	1.80479		1.6175
		0.359056	0.748648	2.06219		1.54336
		1.36413	0.919652	1.63437		2.22121
		0.983007	0.7124	1.04138		1.09636
		1.65053	0.850959	2.26473		0.596723
		0.562535	0.832338	1.18492		0.676365
		1.02606	0.834275	1.42004		0.773514
		1.32508	0.885274	1.61048		0.858833
		0.97656	0.860177	2.0307		0.805072
		1.14579	1.23891	1.36059		1.09322
		1.23244	1.216	1.33964		0.556088
		1.17284	1.36015	1.7152		0.828816
		1.36418	1.19954	0.925966		1.04589
		0.411032	1.49357	0.9128		1.72752
		1.26695	1.34151	1.06396		0.645614
		0.972271	1.00034	1.45857		0.900266
		1.5093	1.27655	1.02404		0.715514
		0.666301	1.66006	1.48644		1.01876
		1.14244	1.13231	0.568396		0.864281
		1.01773	1.21508	1.88723		2.2541
		1.25858	0.873177	1.17795		1.1951
		1.19914	0.568396	0.703187		1.02657
		1.2857	1.03775	1.57775		0.832696
		1.25174	0.913804	1.24167		0.579571
		0.89441	0.750189	1.5322		0.934258
		1.41338	1.43451	1.68497		1.10197
		0.858128	1.12073	0.615111		1.26904
		0.497318	0.778285	1.37649		1.64541
		1.09294	1.00749	1.10664		0.928039
		1.11836	0.993328	1.63939		0.4701
		1.02635	2.21693	1.17212		1.7737
		1.61814	0.82609	1.58347		1.67732
		1.33177	0.973451	1.02248		0.815919
		1.1094	1.11019	1.45032		1.25116
		1.34862	1.00147	0.980624		0.909802
		1.48964	1.02866	0.608945		1.10512
		1.19078	1.10171	0.556088		0.715394
		1.10908	0.922817	1.09112		0.635322
		0.948898	0.815158	1.47706		0.502535
		1.86463	1.10784	2.21915		1.24039
		0.995645	1.14002	1.60557		0.405512
		0.888272	1.43097	2.90823		0.935253
		1.33328	1.12021	1.06651		1.09455
		1.13047	1.80784	1.16749		1.59928
		0.839078	1.27521	1.92333		0.909955
		1.24626	1.0786	2.15402		0.892257
		0.965997	1.23644	2.12688		0.405512
		1.0191	1.53685	1.27411		1.08326
		1.51691	1.14887	2.02995		0.607991
		0.734898	1.23936	2.04245		0.698937
		1.39732	1.04656	0.901148		0.627505
		0.915295	1.39426	1.21598		0.809132
		0.88004	0.66452	1.17532		1.21941
		1.35301	1.09188	2.00368		0.683609
		1.37549	1.43981	1.74898		0.568058
		1.23176	1.5818	2.21754		0.886575
		0.878977	0.773072	2.0545		0.542986
		0.599332	1.16672	1.01249		0.884595
		0.903785	0.932912	1.37217		0.78076
		1.19069	0.962204	1.4257		1.59351
		1.19639	0.978354	1.11721		1.52398
		0.982426	0.621294	1.07367		0.839394
		0.501331	0.359056	1.3393		0.825626
		0.6351	1.18174	1.80853		1.78347
		1.10831	0.908181	1.33223		1.042
		1.38076	1.04058	1.43473		1.20909
		0.980421	0.800721	1.47404		0.639778
		1.31694	1.97443	1.18788		0.794672
		0.987623	1.22251	2.49066		0.745558
		0.677366	1.2871	0.811555		1.10508
		0.989885	0.585778	1.37707		0.846698
		1.08665	1.55794	1.23507		0.654231
		1.291	0.48256	1.21044		0.765362
		1.29917	1.28173	1.09048		0.990517
		1.84925	1.49149	2.17972		0.669195
		0.875228	1.03921	1.14725		1.11928
		1.57475	1.18716	2.81837		0.501938
		0.989462	1.18691	1.61034		0.529313
		1.59372	1.49884	1.04431		0.860279
		1.09837	0.945233	1.87573		0.405512
		1.24087	1.03434	1.51936		0.998218
		1.60307	1.12766	0.612906		0.842666
		1.06404	1.08612	1.96857		0.890515
		1.03483	0.942336	1.94101		1.09565
		1.20051	1.18732	1.88923		1.29593
		1.56629	0.975966	0.605813		1.40884
		1.15288	1.27035	1.99115		1.21612
		2.00751	1.3302	0.666099		0.802888
		1.76249	1.09794	0.710445		0.805323
		0.713924	1.20313	1.20238		0.824263
		0.738709	1.4719	0.4701		1.50519
		1.34488	1.1858	0.550871		1.13973
		1.26591	1.21226	1.33729		0.64124
		1.22384	0.906413	1.41633		1.05426
		1.2417	1.12551	1.72629		0.581176
		2.09306	1.41273	0.491071		1.16149
		1.90139	0.967456	1.27814		1.00478
		1.64279	0.918013	0.458476		0.723491
		1.67635	0.856205	0.4701		0.405512
		1.28658	0.94459	1.21436		0.858128
		0.979524	1.35492	1.95805		0.713556
		1.33309	1.07678	1.39365		1.0714
		1.072	1.11323	1.74656		1.58657
		1.28469	1.16769	1.87492		1.11845
		1.12373	0.581414	1.58985		0.744956
		1.08385	0.916682	2.74738		1.40157
		1.16288	0.935075	1.12517		0.57506
		1.04362	0.956791	1.66183		0.688753
		1.08612	0.716897	1.66246		1.48213
		0.838124	1.07595	1.80042		1.29858
		1.13144	0.766079	1.51985		1.33162
		0.853325	0.721496	0.411032		1.60226
		2.13931	1.28359	2.01203		0.709195
		1.12173	1.01441	2.0379		0.900779
		1.24764	0.765703	2.35704		0.777809
		1.13035	1.10831	1.41319		0.585678
		1.26012	0.805126	1.35833		1.07827
		1.2031	1.14579	1.17185		1.00431
		1.07295	1.45829	2.12691		1.21177
		0.938266	1.2762	0.443609		0.701114
		1.01806	1.09134	1.93425		0.69102
		1.37247	0.858128	1.99885		1.08394
		1.01201	0.725972	1.4438		0.758353
		1.0747	0.779783	1.36587		0.566287
		1.47069	0.733084	1.89956		1.02115
		1.58671	1.15933	1.35211		0.405512
		1.65119	1.56278	1.96697		0.835746
		1.39741	1.08308	1.69863		0.621972
		0.893552	0.835746	1.47465		1.06393
		0.411032	0.84539	1.50767		1.04006
		1.07259	1.08068	1.01283		1.04161
		0.987549	1.19992	2.09313		1.13512
		1.24934	1.59821	1.45044		0.997174
		1.28984	0.740855	2.39904		0.802414
		1.92538	0.693722	1.16726		0.826023
		1.28733	1.25532	2.07738		0.726519
		1.43013	1.20205	0.761845		0.870831
		1.09319	1.98398	2.21695		1.26178
		1.24014	1.01953	1.85424		0.405512
		1.24941	1.47025	1.09221		0.883609
		1.92399	1.19881	1.78174		0.4701
		1.24803	1.11323	1.92679		0.844783
		1.15347	1.04888	1.53833		1.62678
		0.899735	1.21223	0.973793		0.888624
		0.812422	1.44918	1.40623		1.06183
		1.30939	1.06781	1.92324		1.12235
		1.57188	1.43606	1.54421		0.769372
		1.08857	1.07357	1.1946		0.969832
		0.657588	1.34453	0.840741		0.700085
		1.03659	1.4048	1.71317		1.18165
		1.29849	0.648496	2.16725		0.608945
		1.72157	2.38635	2.08974		1.10938
		1.18976	0.662555	1.65394		0.748876
		1.57011	1.46926	1.67293		1.38081
		2.03707	1.34747	1.01446		0.542986
		1.24179	0.88147	1.17602		0.943788
		1.39833	0.985791	2.20326		0.716575
		1.47229	1.59018	2.36891		0.714629
		1.02187	1.45585	2.03271		1.04377
		1.25735	1.5526	1.69666		0.535262
		1.44348	1.61936	1.00929		1.02939
		1.12138	2.16931	1.84631		0.983776
		1.31894	1.18326	0.930171		0.501938
		2.68195	1.30047	0.921175		0.884398
		1.02582	0.977688	0.685702		1.23052
		0.84852	1.55282	1.02895		0.73995
		0.914178	1.49984	1.64603		1.0827
		0.987267	1.06921	0.604115		1.59072
		1.45027	1.22906	0.529698		1.10503
		2.76051	1.18095	1.20948		1.0312
		0.947068	1.76523	1.5327		0.77739
		1.37001	1.24114	1.8456		0.637012
		1.51085	1.14627	1.68641		1.32756
		1.00696	1.63455	2.03323		0.955895
		1.01564	1.20422	0.987648		1.08348
		1.42503	1.1273	1.87821		1.0462
		1.18331	1.53114	1.61404		0.85393
		1.54302	1.64478	1.86505		1.04622
		1.89366	1.22975	1.773		0.764093
		1.48562	0.71951	1.64651		1.06601
		1.05414	1.32912	1.51587		0.899642
		1.17464	1.20554	1.78247		1.50925
		1.27526	1.55928	1.94393		0.889468
		0.916704	1.30775	1.3345		0.837492
		1.84509	1.2002	0.550703		0.905635
		1.0151	1.22128	1.99531		0.91325
		0.769573	1.56713	1.95581		1.18175
		1.29417	1.99172	1.64683		0.695414
		0.983194	1.37936	1.86658		0.690021
		1.47713	1.26709	1.48187		0.965174
		0.958638	1.37943	3.33736		0.948871
		0.982909	1.06188	0.405512		0.749282
		1.36417	0.97838	0.443609		0.74384
		0.865616	2.27672	1.84194		1.4155
		0.851424	1.85691	1.71699		0.934097
		1.37122	1.82766	1.17866		0.628863
		0.65689	2.17802	0.994234		0.701603
		1.40716	0.501713	1.04786		0.696482
		1.13757	1.49632	2.07943		0.741099
		1.06034	1.0656	1.58983		0.629377
		0.851589	1.47502	1.95475		0.405512
		0.920018	1.57481	0.583974		0.540452
		1.11335	0.973236	0.359056		1.41579
		1.14179	1.90951	1.64786		0.543323
		1.2491	0.710322	1.12092		1.09864
		1.29417	1.5325	2.18842		0.891519
		1.02807	0.677366	1.13997		1.07144
		1.1856	2.13416	0.48256		0.359056
		1.2809	1.61374	2.36181		0.593064
		1.46621	0.914258	2.16793		0.916447
		1.23936	0.694913	2.39197		0.776243
		1.23664	0.983805	1.73035		1.69696
		0.98235	0.848844	1.64983		1.42899
		1.04719	2.88989	1.94465		1.2415
		0.839264	1.06914	0.734512		0.765092
		1.07148	0.963281	2.87677		0.995802
		1.77778	0.988744	1.46943		1.37178
		2.1478	1.33821	1.94105		0.712528
		1.28654	1.77281	2.11717		1.85352
		0.983676	1.24833	0.817545		0.861006
		1.13878	2.03254	1.60878		0.96438
		1.54827	2.00176	1.44356		0.925788
		0.61543	1.49127	1.89113		1.19784
		1.00853	1.64583	2.62833		0.856971
		1.85341	2.24042	1.22		0.727637
		1.20768	2.29941	1.61209		1.26519
		0.7752	2.31141	2.12537		1.32448
		0.876404	2.0339	0.911315		1.38762
		1.00127	1.1458	1.44953		1.088
		1.26899	0.989225	1.28131		0.723
		0.756915	2.40173	1.9266		0.97899
		1.52785	1.55235	1.92028		0.451534
		2.01938	1.42391	1.38186		0.405512
		1.85839	1.66866	2.21196		1.30067
		1.7734	1.35965	2.12593		0.608945
		1.48283	1.57877	1.97958		0.955224
		2.49418	0.792494	1.4309		0.48256
		1.85383	1.47175	1.59595		0.497318
		1.18473	1.12281	1.79209		1.01004
		1.33856	1.78626	1.47804		1.03641
		1.10589	2.74823	1.81466		0.661883
		1.51629	1.4033	0.607314		0.83975
		0.972428	1.81624	1.0964		0.712904
		0.887917	1.59929	1.55643		0.975519
		0.971172	1.44262	1.11014		0.773079
		0.556088	1.36789	0.700251		0.672276
		1.83822	1.83416	1.98723		0.620664
		1.19644	1.12339	2.16252		0.69102
		1.37106	1.0691	1.59655		1.11477
		1.04547	1.29884	2.13503		0.600072
		2.04623	1.26834	0.766813		1.0228
		1.11697	1.96099	1.62316		0.921717
		1.27712	0.967453	0.501938		0.820606
		1.41881	0.926536	1.63477		1.27982
		1.08098	0.843087	1.60027		1.10854
		1.13649	1.8951	0.359056		1.4037
		1.90661	0.939909	2.83377		1.3162
		1.04717	0.863837	1.71624		0.913149
		0.852975	1.33894	0.62089		1.30061
		1.25291	0.752397	2.14718		0.921654
		0.556088	1.83375	0.582021		0.713924
		0.981138	1.10401	1.84941		1.02741
		1.30303	1.31036	2.30328		0.984443
		0.741663	2.18527	2.38386		1.02534
		1.33565	1.55232	1.50094		1.76703
		1.11107	1.85983	0.532084		0.721889
		1.09164	1.64763	0.76249		0.708649
		1.15888	1.78344	1.74771		0.828778
		1.42236	1.53523	2.08433		0.64643
		0.61964	1.57257	1.46143		0.669859
		1.00246	0.556088	1.78564		0.855334
		0.675948	2.6429	1.90681		0.536712
		1.62235	1.65739	0.904279		0.748648
		1.04427	1.59767	0.965425		0.589633
		1.79997	0.852975	0.597314		1.0048
		1.15101	1.32877	1.37818		1.17226
		1.03066	2.72483	1.75332		0.722938
		1.10911	1.19955	1.43763		0.736935
		1.10173	1.4404	0.740541		1.08155
		0.950884	1.36918	2.63366		1.53775
		0.829653	1.33494	0.700251		1.35346
		0.711647	1.61978	1.81569		0.791204
		0.975424	1.59498	1.59216		0.89003
		1.08858	1.14811	1.57704		0.532084
		1.6187	1.56002	1.61216		0.976565
		1.08731	1.60282	0.359056		0.556088
		0.837893	1.67486	1.16407		0.763353
		1.0578	0.834517	0.405512		0.78611
		1.24103	1.63292	1.60279		0.73907
		1.01711	1.4286	1.49663		0.78176
		0.727581	1.03219	1.19137		1.26563
		1.66772	1.33547	1.6518		0.711492
		0.639096	1.29072	1.18763		0.814311
		1.00868	2.05492	1.84897		0.68334
		1.17735	1.06034	1.24853		0.846955
		1.04445	1.34373	0.501713		0.812019
		0.777827	1.25175	0.91674		0.685789
		1.32976	1.95722	0.588612		1.07003
		0.958702	1.30252	1.69811		0.921202
		1.32834	1.6173	1.86572		0.877199
		0.838776	1.86339	1.76441		1.10817
		0.629185	1.02232	1.48874		1.06037
		1.45058	1.42228	1.23757		0.803714
		1.00466	2.12455	0.536712		1.26496
		1.12322	2.13735	2.06871		0.98289
		0.991709	1.56171	0.957084		0.837841
		0.954025	2.2029	0.828778		0.942665
		0.776746	2.36118	2.23572		0.835634
		1.51564	1.63881	1.49444		0.686115
		0.603387	1.6768	1.30794		0.443609
		0.61	0.888613	0.782088		0.568396
		1.1362	1.55833	2.33628		0.778727
		0.917148	1.73173	0.753228		1.23962
		1.43448	2.20173	1.7257		1.09339
		0.774509	1.96558	0.701603		0.924609
		1.04579	1.94564	1.18579		0.860279
		1.36072	1.08716	1.69469		0.831789
		0.501938	1.22626	1.49615		0.83008
		1.44673	1.46378	2.1764		0.710939
		1.04715	2.00364	0.871857		1.10468
		1.36317	1.07207	0.639096		1.44551
		1.02849	1.09855	2.12168		0.627496
		0.724723	1.49828	0.947685		0.359056
		1.3712	0.65761	1.95319		0.593064
		1.09484	1.62362	1.33412		0.937098
		1.96355	1.91816	1.46686		0.48256
		1.36412	2.32378	1.13873		0.845925
		1.26079	2.17988	1.85586		0.629185
		1.66334	2.08152	2.3265		1.37741
		1.40854	1.30659	1.51684		1.04034
		1.81207	0.877831	0.359056		1.04354
		1.0233	1.06329	1.49208		0.924631
		1.16033	1.8745	0.868102		1.38384
		0.950326	1.77983	1.71769		0.70895
		1.44988	1.32957	0.451534		0.834517
		1.19386	0.829775	1.31075		0.685347
		0.969292	2.0455	1.19144		0.501331
		1.43369	2.84938	1.2746		0.790725
		1.70243	2.11436	1.06517		1.11366
		1.52109	0.948896	0.995151		1.08207
		0.864281	1.30621	1.90034		1.23855
		0.797839	0.62089	2.05676		1.20515
		0.856384	0.95652	1.76778		0.772487
		1.04772	1.60533	1.21533		0.880401
		1.03659	1.86862	2.37035		1.74362
		0.795121	1.40982	1.43222		0.990714
		0.884595	0.872382	0.993648		0.359056
		1.06167	1.14884	0.750556		0.836455
		1.99934	0.986085	1.07976		0.740855
		0.733237	1.559	1.31717		0.881781
		1.06329	0.932351	0.411032		1.17103
		1.24043	1.07274	1.22964		0.497318
		1.62412	0.684453	0.842303		0.634643
		2.01464	0.912484	1.51629		0.769573
		1.44191	1.46725	1.57982		1.05225
		1.41741	2.1869	0.691719		1.56016
		1.85735	0.874921	1.71252		1.26647
		1.4945	1.25794	2.42833		0.82226
		1.04018	0.816717	0.790542		1.09373
		1.20099	1.05876	1.64895		0.826593
		0.98016	2.28583	1.61296		0.938849
		0.994441	0.809373	0.54899		1.43247
		1.82964	1.05218	0.359056		0.720473
		1.34536	1.08559	1.93102		0.924631
		1.77887	0.748648	1.29832		0.812568
		1.58713	1.20703	1.45429		0.883132
		1.29661	1.87506	0.522311		0.938849
		1.57739	1.31046	1.25096		0.451534
		0.782174	1.35597	1.15104		0.945528
		1.27888	1.23235	1.3628		1.05882
		1.1359	1.11382	2.98078		0.709307
		0.857595	2.11709	1.36147		1.09601
		1.32423	1.26288	2.06443		0.714155
		2.30966	1.11938	1.11045		1.35597
		1.83225	1.15675	2.2179		1.13302
		2.27541	1.22416	1.09046		1.57649
		1.34259	2.13866	0.667133		0.792169
		1.10501	1.41471	0.970527		0.522311
		0.76706	1.77763	1.2139		1.70055
		1.24645	2.48465	1.19644		0.786886
		0.878678	1.38818	0.732976		1.12173
		1.04626	1.30225	1.48459		0.405512
		0.91454	1.03941	2.36898		0.710039
		1.36477	1.54338	1.26425		1.17938
		2.01118	1.30552	0.359056		0.877846
		1.76334	1.4724	1.37396		0.992796
		0.983596	0.501938	1.39544		1.25116
		0.971011	1.07145	1.49697		0.760385
		0.94484	1.67444	1.05655		0.815767
		0.989545	1.28255	0.906104		0.983034
		1.16497	1.43642	2.24839		0.753323
		1.33527	1.08183	1.76647		0.763135
		1.29674	0.517811	1.48341		1.06804
		1.47368	1.27005	0.550703		1.31585
		0.958985	1.16059	1.26079		0.83749
		1.58266	1.20625	1.29558		0.943359
		0.899642	1.33882	1.50737		0.605544
		1.54677	1.08238	1.20583		0.497318
		1.26731	0.359056	1.85709		0.644285
		1.36503	1.01847	1.512		1.16306
		0.882317	1.04397	1.29989		0.886716
		1.16933	2.16768	0.955697		1.72692
		1.23861	1.69481	0.679436		1.26754
		1.40305	1.64689	2.17604		0.97845
		0.905056	1.10981	1.4649		1.42902
		1.08464	1.73778	1.45344		0.735095
		1.12083	2.40735	1.76119		0.629592
		1.34259	0.659223	1.75536		1.0151
		0.683671	0.816632	1.91168		1.25424
		1.34259	1.06379	1.78679		1.29017
		1.63601	1.34856	1.95296		1.64004
		0.501331	1.23234	1.29168		1.03916
		1.40181	1.75005	1.67978		0.653938
		1.66552	1.48328	1.86861		0.975296
		0.994361	1.65807	1.95079		0.543323
		1.86802	1.24827	2.0245		0.451534
		1.14914	0.839928	0.963688		0.767946
		1.2386	1.39119	1.74317		1.37344
		0.922433	1.63781	0.580038		1.13484
		1.04715	1.15431	1.64829		1.25979
		1.1278	1.74004	1.35322		1.52672
		1.05716	1.55447	2.12554		1.14958
		1.13232	1.11604	1.7718		0.769573
		1.11591	1.56584	1.6607		0.946751
		0.911292	1.75573	1.21428		0.906413
		2.33231	1.37583	0.642865		0.798746
		1.27205	1.79512	2.00106		0.77651
		1.5448	1.6561	1.47768		0.797168
		1.42114	1.3324	2.0006		1.01283
		1.72889	1.43237	1.30548		0.562296
		1.27328	1.26554	1.49291		1.05874
		1.149	1.67552	1.65834		1.25365
		1.49884	1.13757	2.87401		0.743133
		1.04512	2.93168	1.17772		1.0151
		1.55002	2.2118	1.30654		0.85152
		1.28732	0.943654	1.06693		0.703601
		1.11612	1.80366	1.09905		0.616299
		1.26074	1.68181	0.821148		1.17201
		0.955868	2.5913	0.359056		1.11262
		0.8315	1.59564	0.639778		1.25651
		1.37982	1.13586	0.359056		1.3931
		0.945233	0.63366	0.769573		1.16
		0.900218	0.871393	1.3645		1.43023
		1.53212	0.870894	1.72536		0.74828
		1.47068	0.501938	1.38705		1.18846
		1.43492	1.48892	0.762453		0.794133
		1.46687	1.22514	1.01842		0.497318
		0.703601	0.680204	0.884459		0.968517
		1.18613	1.3619	2.12923		0.639778
		1.24871	1.17074	1.02878		0.892172
		1.07254	1.17104	2.40155		1.15485
		0.901467	1.23691	0.937395		0.713556
		0.76257	1.29001	1.29776		1.51042
		1.17202	0.75926	1.82706		0.718644
		0.707481	2.09842	1.34956		0.865172
		1.85746	0.937108	1.92817		1.06396
		1.0434	1.50707	1.70733		1.36165
		1.40674	1.41826	0.661645		1.58337
		1.02942	1.16937	1.08206		0.899416
		1.01622	1.36021	1.38252		1.37705
		1.73802	0.559225	1.15083		0.987549
		0.860529	2.26479	0.747667		0.490064
		0.747136	1.20321	0.875665		1.06167
		0.78076	1.87255	1.77761		1.33885
		1.15996	1.83338	1.51397		0.791498
		0.90964	0.747564	1.68791		1.08689
		1.50836	1.40158	1.4916		0.903467
		0.85087	1.53985	0.798794		0.871883
		1.15928	1.45851	1.74335		0.850926
		1.86244	1.14536	2.54597		1.19004
		1.70656	2.79265	1.40479		1.05477
		1.3223	1.15813	1.97239		0.628863
		0.595236	2.14452	2.02398		0.405512
		1.56784	1.31251	1.34465		0.689388
		1.01936	1.09989	1.46849		0.895866
		1.00276	1.71001	2.38321		0.668407
		1.4839	1.26362	0.685789		1.0521
		1.28968	2.26078	1.19696		0.823793
		0.665017	1.06509	1.99331		0.405512
		1.89963	1.07675	1.53027		0.98691
		0.730246	2.38343	1.37672		0.501938
		0.529313	1.42537	2.01431		0.763135
		1.07138	0.706972	1.38139		0.677993
		1.74108	1.36103	1.64946		0.660934
		0.980957	0.992862	1.68713		0.798746
		1.55479	2.51005	0.968883		0.581176
		1.04459	1.65901	1.95942		0.773079
		1.0027	1.27444	1.19817		1.06067
		0.957233	1.37676	1.17472		1.18276
		1.01347	1.71862	1.46446		0.848116
		0.649907	1.58162	1.55669		0.843872
		1.13467	1.28664	1.14759		0.782591
		0.922915	2.49986	1.55609		1.13115
		1.25768	1.21194	1.2974		0.677627
		1.34224	1.98011	1.19452		1.46923
		1.21072	0.888272	1.16668		1.43643
		0.844019	1.30084	0.90459		0.891607
		0.974955	0.896251	1.27041		1.51556
		0.359056	1.76209	2.17749		0.633232
		0.411032	1.92481	0.751132		0.514169
		1.44904	2.34783	1.43488		0.886825
		1.41581	0.669094	0.792048		0.556432
		1.54061	0.965755	1.20891		1.4303
		1.21907	1.39018	1.67128		0.645614
		0.826593	0.820584	2.46035		1.31458
		1.27962	1.33466	1.47122		0.943377
		2.10712	1.12123	1.64937		1.28592
		1.56183	1.15855	1.61425		0.654277
		1.1525	1.10759	1.68823		0.805189
		1.16404	1.51064	1.17088		0.883291
		1.47561	1.05699	2.08547		1.02302
		0.733194	0.901951	1.18092		1.2344
		1.39226	0.79519	2.00945		0.451534
		1.28751	1.96734	1.41725		0.964747
		1.67271	1.33183	1.42392		1.23315
		1.40399	1.08763	0.891266		0.82226
		1.04338	1.90876	2.16417		0.855946
		1.26197	1.12588	2.23752		0.501938
		0.78611	1.0241	1.53754		0.723783
		1.28928	0.991797	1.15687		0.501938
		1.1148	1.49038	1.73		1.51396
		1.70896	1.22096	1.13363		0.993036
		1.02424	1.98416	2.02831		1.43215
		1.11323	1.37786	1.43242		0.556602
		1.6022	1.22674	1.09804		1.20596
		1.40308	2.09679	0.405512		0.814311
		1.29682	1.57142	1.87462		0.995081
		1.24577	1.12959	1.34814		0.663824
		0.894948	1.61773	1.65482		1.04373
		1.00749	0.729623	0.74128		0.955918
		1.18735	0.48256	1.08907		0.828816
		0.91207	1.90825	1.93944		0.866867
		0.845706	1.45469	1.5988		0.943706
		1.08245	1.12159	1.60516		0.977579
		0.715462	1.24487	1.06347		1.14362
		1.24777	1.64365	1.90166		1.17549
		1.45127	1.75309	1.74479		1.05396
		1.12579	0.875183	1.74274		1.36847
		1.46485	2.15744	1.36035		0.723491
		1.34578	1.74282	1.02142		0.670394
		1.18528	1.69343	1.95083		1.77678
		1.19994	1.03819	0.405512		1.03416
		1.33143	1.95785	1.1853		0.992937
		1.73373	1.76426	1.78684		0.579184
		1.42405	1.53222	3.21187		0.693942
		0.666099	2.06211	1.94807		0.642759
		1.4834	0.934214	0.81946		1.23774
		1.59566	0.895392	2.04513		1.43798
		1.76569	1.43762	1.55894		0.640273
		0.6351	1.62294	1.45285		0.405512
		1.66656	1.53201	1.71428		1.26973
		0.895853	1.8041	1.77771		0.819802
		1.02408	1.23682	0.677366		0.476971
		1.01061	1.81199	1.45332		1.07511
		1.07221	1.19263	2.40354		1.60059
		0.910079	2.28374	1.32916		0.671992
		1.1024	0.838423	2.36871		0.65918
		0.955149	1.45579	1.00292		0.675948
		1.42147	1.51713	2.12701		0.568396
		1.16943	1.06885	0.582274		1.83317
		1.07283	0.506337	1.71387		1.14868
		0.869663	2.18818	1.43479		1.10296
		1.09519	1.58032	1.58576		1.23674
		2.13366	1.70772	1.44566		1.27502
		1.09376	1.15453	1.2411		1.62205
		1.33214	1.9688	1.60296		0.937359
		1.7764	0.9597	0.857698		0.857113
		1.88175	1.08281	0.776856		0.502535
		1.35037	0.797772	1.86322		0.960613
		0.901825	2.15978	0.735317		0.686437
		1.0582	1.16346	1.92894		1.22329
		1.57388	1.51169	1.74838		0.852707
		1.34596	1.10177	2.05858		1.03674
		0.865214	1.50286	1.60647		0.713556
		1.3526	1.65062	1.50584		0.832462
		1.23601	2.13929	1.38902		0.679749
		0.946221	1.06288	0.610138		0.753001
		1.38281	1.39149	1.29247		1.13156
		0.988369	1.08254	0.443609		1.28911
		1.33939	0.835824	0.61		1.34887
		1.87266	1.35515	1.79726		0.778576
		1.40043	1.16707	0.570694		0.927413
		1.30912	1.50339	0.718526		1.27355
		0.94734	1.89283	1.47351		1.51116
		0.707614	1.31869	1.51651		0.546542
		0.977967	1.98123	1.29554		0.984633
		1.37029	1.76845	2.26904		0.644285
		0.943833	2.23795	0.443609		0.701114
		1.45053	0.912384	0.530986		1.07547
		0.93374	1.21405	2.14899		1.06199
		0.971679	1.29834	1.70962		1.05178
		0.733266	1.12411	2.35257		0.882563
		0.901891	1.38545	1.03924		1.03388
		1.26728	1.85479	0.405512		1.4308
		2.12763	1.14871	1.70862		0.84039
		1.08415	1.27601	1.50542		1.2121
		0.818491	1.44961	1.16166		1.14452
		1.10663	1.64827	1.67219		0.82226
		0.944406	2.12947	1.52143		0.82094
		1.21876	1.12964	2.37793		0.405512
		1.30231	2.12778	0.607991		1.06375
		1.73681	1.12564	1.57604		0.876272
		1.12654	0.76226	1.26693		0.359056
		1.02814	1.3211	1.32709		1.17202
		1.25399	1.74948	1.50161		0.727696
		0.640935	0.909829	1.41462		1.29916
		1.30036	1.96177	0.947714		1.44941
		1.31342	1.27043	2.00017		0.84812
		0.443609	1.68671	1.08828		0.663584
		0.921479	1.60111	1.40619		1.05698
		0.796336	1.05777	1.17966		0.701114
		1.07086	1.6946	0.411032		0.881243
		0.753597	1.45268	0.733039		1.36305
		1.15719	1.15255	0.359056		0.921478
		0.676365	0.761917	1.82439		2.05527
		0.773079	1.21523	1.22487		0.860484
		0.967477	2.60042	1.18007		1.2465
		0.927098	1.47427	0.662007		1.13183
		1.02175	1.28931	2.10861		1.51047
		1.37198	1.19208	0.359056		0.850374
		1.29267	1.30597	1.29743		0.662007
		1.67911	1.42987	1.32912		0.994037
		1.22221	1.52737	0.752604		0.411032
		0.87081	0.920837	1.36241		0.798746
		1.06167	0.642759	1.60585		1.42658
		0.973599	0.987202	1.76719		0.892269
		0.896647	0.743133	0.697894		1.02942
		1.11052	0.61489	1.00764		0.912954
		1.01514	1.41914	1.98079		1.79828
		1.59166	0.953305	1.16888		0.75075
		1.10026	1.18607	1.85243		0.691843
		0.359056	1.55335	1.78475		1.00441
		1.43989	1.26115	1.37552		0.91454
		0.914594	1.46875	1.68652		0.828572
		1.04828	1.1473	1.37726		0.877108
		1.31517	1.4154	2.19932		1.75874
		1.24425	1.39226	1.61529		1.08885
		1.32163	2.0642	1.93291		0.790491
		1.37742	1.11016	1.588		1.33872
		1.78035	1.30085	1.74035		1.00518
		1.87122	1.57774	1.24136		0.710039
		1.05708	1.77902	2.19115		0.800721
		2.0435	1.48533	1.21028		1.21836
		1.43898	0.734898	1.3728		0.661344
		1.32372	2.615	1.9765		0.967241
		1.2535	0.910772	1.28536		0.859676
		1.49811	0.895609	1.85069		0.853145
		1.08461	1.36372	1.63326		0.921205
		0.967664	1.37584	1.99398		1.57008
		1.29227	1.19144	1.94088		1.8413
		0.680204	0.894787	1.54598		1.12708
		1.47448	1.12137	1.68967		1.22228
		1.04679	1.45274	1.67257		1.01311
		1.29157	1.15194	2.32322		2.2889
		0.610738	1.52037	1.34044		0.782525
		1.32113	1.29021	0.992485		0.648838
		1.47392	1.88566	0.451534		1.1683
		1.25228	1.54704	1.53327		0.860881
		0.536712	1.971	1.562		0.938505
		0.998833	1.01357	1.6276		0.943519
		0.4701	1.1417	1.72877		0.889456
		1.65353	1.32957	1.34929		0.671545
		0.698307	1.15623	1.391		1.29574
		1.08523	0.957974	1.573		0.633399
		0.918881	1.04452	0.443609		0.775453
		1.20065	1.09813	0.850338		1.10245
		0.835027	1.40636	1.25025		0.783046
		1.78167	1.87575	0.446615		1.81051
		1.00745	0.872997	1.39464		0.620527
		1.88051	1.64981	0.763135		0.878393
		1.94528	0.91975	1.53307		0.763135
		0.765871	1.12184	1.48841		0.930999
		1.55748	1.60649	0.765092		0.919138
		0.722924	2.00578	1.59479		0.946153
		1.48274	1.30127	2.16975		0.782475
		1.46627	1.57213	1.00659		0.639096
		0.763135	1.75487	1.45793		0.913568
		1.59823	1.03047	0.604598		0.405512
		1.42976	1.21044	0.987267		1.27109
		1.58838	1.68388	0.987267		1.52654
		1.44428	1.90946	1.67023		0.948887
		0.942083	1.5656	1.97567		1.72593
		1.73368	1.21445	1.76822		1.8519
		1.02844	0.489271	1.40958		1.58357
		1.5748	1.23906	1.66753		1.35896
		1.35651	1.18466	1.70974		0.983606
		1.50133	1.42483	1.78293		0.904604
		1.63756	1.19786	1.97211		0.856568
		1.53258	1.69054	0.583427		1.18173
		1.35484	1.43281	1.40474		1.07546
		0.78176	1.5638	1.0206		0.761221
		1.50279	1.31303	1.15091		0.642759
		1.19596	1.42419	0.359056		0.869503
		1.56626	2.08621	1.09796		0.850333
		1.60481	1.64098	1.36797		0.861873
		1.15309	1.72115	0.962943		0.913865
		1.9624	1.63479	2.03575		0.713556
		1.13746	1.03951	1.93764		1.13615
		0.702546	1.22488	1.96375		0.604408
		1.0008	0.92749	2.46071		0.871543
		1.52155	1.38293	0.634245		1.30158
		1.08468	1.40579	2.38986		0.825707
		0.98221	0.65699	1.71637		1.12043
		1.74805	1.0597	2.37988		1.02245
		0.836647	0.822033	1.21829		1.03221
		0.829508	1.21796	1.00059		1.05385
		1.57174	1.2652	1.23739		0.923239
		0.924414	1.92631	2.23859		0.806646
		1.15896	1.60853	1.66539		0.770952
		1.6519	1.18786	2.40903		0.914363
		0.649907	1.92899	2.04877		0.870979
		1.11554	0.500736	1.88366		1.13755
		1.25473	1.14112	1.93748		0.618375
		1.36355	1.13655	1.63283		0.632031
		1.06065	0.889003	0.359056		1.03633
		1.52358	2.02303	0.877108		0.753461
		0.932964	1.55173	0.952858		1.04993
		0.796421	1.87492	2.41968		0.559608
		1.0126	1.19335	1.42918		0.666887
		1.26433	1.36877	1.41984		1.17332
		1.72782	0.835658	1.11801		1.10302
		1.0728	1.43037	0.679566		1.00066
		1.19469	1.00915	1.62071		0.785894
		0.960613	1.25006	1.33349		1.04917
		2.92682	1.79112	1.84896		0.725576
		0.752397	1.1998	2.04975		0.802414
		1.73256	0.835633	1.67278		0.57506
		1.57701	0.600547	1.28619		0.877266
		0.948109	1.21836	1.60227		0.701141
		0.992614	0.740792	1.34963		0.682878
		1.36042	2.28901	1.91533		0.79281
		1.43388	1.60855	2.08657		1.18296
		0.899913	1.66281	1.63472		0.885346
		1.6954	1.7322	1.77555		0.642759
		1.26175	1.74466	1.47507		0.975641
		0.888158	3.21451	2.5228		1.27266
		1.39983	1.69301	2.01365		1.05781
		1.14114	0.922253	1.6408		1.02331
		1.04794	1.80363	1.47567		0.681059
		0.988144	1.34934	1.02804		0.627496
		1.25618	1.12484	0.501331		0.910602
		1.88286	1.90061	1.73038		0.949842
		1.45866	1.06475	1.81182		1.21333
		1.29569	1.62334	1.80254		1.22027
		0.942094	1.1317	0.758644		1.41925
		1.06192	1.94618	1.64066		0.920849
		0.85393	1.14086	1.5451		1.50195
		1.23834	2.3808	0.411032		0.989071
		0.972367	1.56715	2.35234		0.793491
		1.58095	1.48063	1.60474		0.654231
		0.889003	1.67887	1.44359		0.642759
		1.38729	1.14771	0.463193		1.20453
		0.514169	0.825626	1.69063		0.850787
		1.18881	1.00513	1.60141		0.867275
		1.06698	2.30221	2.90041		0.562535
		1.11035	1.16115	1.00496		1.76874
		1.12658	2.15061	2.07891		0.542986
		1.47182	0.840185	2.04976		0.837304
		1.10173	0.705248	2.24104		1.23507
		1.10037	1.55335	1.10181		0.790491
		1.39282	2.21246	1.30218		1.05964
		1.12075	2.19811	1.58025		0.704347
		1.70184	1.12073	1.81983		1.07495
		0.923958	0.746928	3.11657		0.959173
		1.18104	1.47895	1.76901		1.14023
		0.975029	1.30167	1.43088		1.16799
		0.871045	1.35495	1.29444		0.806538
		2.02913	1.21191	1.59068		0.781192
		0.970031	1.83752	2.70222		0.855089
		1.38531	0.979658	2.07699		1.03398
		2.01061	1.53566	1.54792		1.24934
		1.26185	0.501713	0.820712		1.61813
		1.07301	1.99146	1.39484		0.661344
		1.59343	1.36881	2.21071		0.554457
		0.896473	1.42933	1.33156		0.451534
		1.37308	1.03555	1.74469		0.991091
		1.26276	1.04862	1.8139		1.1059
		1.66314	1.7967	1.16114		1.20009
		0.942068	1.6823	0.590301		0.93435
		1.63136	1.04737	1.04862		0.828572
		1.48394	1.45599	1.44014		0.514169
		1.15526	1.49828	0.797772		1.72459
		1.6245	1.64311	1.41106		1.21523
		1.07114	1.27378	1.76237		0.528951
		0.922777	1.21637	2.32542		1.24697
		1.25633	1.32049	1.4373		1.03576
		0.831745	0.833558	1.22628		0.98141
		1.09508	1.30293	1.56984		0.929007
		0.607991	0.94441	2.74907		0.733084
		0.870133	0.91563	1.03795		0.662007
		1.05527	0.873465	1.42052		0.885881
		1.71106	0.861131	1.70625		0.979524
		1.1861	1.19297	1.61584		1.25231
		1.14854	1.58476	1.52075		1.58415
		0.913804	1.06545	1.60045		0.861644
		1.01248	1.30823	1.66388		0.929506
		1.08272	1.31195	1.78761		0.876454
		1.28654	2.05677	1.49155		0.671684
		1.51415	1.01208	1.85713		0.443609
		1.4108	1.02208	1.60261		1.07531
		1.82025	1.14106	1.49582		1.35313
		0.745728	1.6818	2.03235		0.839429
		0.711647	1.22392	1.73566		1.26479
		1.71865	1.37866	2.0822		2.21098
		1.09696	1.72421	2.01272		1.04726
		0.98858	1.339	1.68867		0.608945
		0.965775	1.55916	2.53074		0.621294
		0.822745	1.55039	2.52077		0.405512
		0.595236	1.38317	1.94171		0.71575
		0.789396	1.84986	1.67327		0.751132
		1.12662	0.929065	1.82355		1.09489
		0.924542	0.74417	0.902949		1.6724
		2.26144	1.6862	1.38792		0.852202
		0.556088	0.742348	2.99516		1.3487
		1.54443	0.883877	1.44147		1.01953
		1.0713	1.56977	2.3426		1.27521
		1.12438	1.0639	1.56164		0.887168
		0.958599	0.841926	1.36499		0.691625
		2.07922	1.06112	1.44099		1.08551
		0.975738	0.957308	1.60389		1.47329
		2.48563	1.11686	0.581414		1.25416
		1.64105	1.83503	1.85569		0.986443
		1.17454	1.04327	1.79395		1.01467
		1.07885	1.62604	1.49538		1.53283
		1.52427	1.40158	1.75145		0.636911
		0.766979	0.828572	3.02658		1.26672
		1.71936	1.33982	0.982967		1.17654
		1.66654	1.79976	2.20725		1.71744
		0.947769	1.12141	1.40716		1.20856
		1.10558	1.0435	1.76565		0.793376
		1.4737	1.59736	1.08896		1.53328
		0.728652	0.869862	1.7883		1.28623
		1.67739	0.838948	1.69919		1.12299
		1.14974	1.25612	1.62364		1.50415
		1.6065	1.26096	1.3318		1.29233
		1.34566	1.37943	1.5735		0.639778
		2.01016	1.47881	1.86442		0.497318
		1.73179	1.23055	2.24435		0.862504
		1.33191	1.3663	1.7773		1.34827
		1.11889	1.72911	1.67569		0.600547
		1.56774	1.15413	1.91		0.969043
		2.37132	1.2287	1.05707		0.808116
		0.965471	1.58347	1.62902		1.29019
		1.10417	1.39379	2.00403		0.972428
		2.53244	2.10282	1.80777		0.792292
		1.13524	0.706577	1.84416		0.637084
		2.1757	0.898401	0.798746		0.359056
		1.40826	1.32606	1.69588		0.706577
		1.15577	1.8377	1.36526		0.639778
		1.2365	1.15679	0.668407		1.1617
		1.05386	1.51859	1.2738		0.559207
		1.14456	1.09762	1.98618		1.32299
		1.15885	2.15444	1.6279		0.688753
		1.03879	0.743675	1.90695		0.648932
		0.687624	0.682185	0.4701		0.925261
		0.866331	0.757555	1.57459		0.960601
		1.04452	1.30008	1.43837		1.31017
		1.5558	0.869936	0.665381		0.857299
		1.27134	1.2327	1.47358		0.593064
		1.95487	1.3221	1.05816		1.22132
		1.37041	1.28037	1.7186		1.03584
		1.2761	0.823003	0.501331		1.04567
		1.00361	1.61671	0.501938		1.16914
		1.30008	1.28074	1.32822		0.942084
		3.47555	1.48845	1.69093		1.09539
		0.826804	1.88402	1.44605		0.790491
		0.877701	0.939404	1.54406		0.73994
		1.12117	1.77406	0.590301		1.05078
		1.19114	1.12831	0.923462		1.00812
		0.98452	0.788311	2.00579		0.405512
		1.49735	1.19982	1.71846		0.649898
		0.868108	0.914178	1.63506		2.02899
		1.1522	1.23304	0.359056		1.00521
		1.48769	0.838156	1.00916		0.405512
		1.43758	0.743367	1.1361		1.01216
		1.18204	0.884016	0.636926		1.0304
		1.34525	1.403	1.18488		0.803722
		1.31328	1.85552	1.70837		0.752751
		1.65009	1.03105	2.21922		0.938849
		1.35309	1.53854	1.22265		1.97214
		1.36879	1.19934	0.359056		1.08682
		2.58785	1.0116	1.45064		1.40764
		1.55808	1.35408	1.54186		1.36677
		1.00385	0.528951	1.61524		1.11019
		1.52775	0.771617	1.47752		0.821819
		1.03359	1.86532	1.93081		0.972323
		0.835746	1.9629	1.28265		0.685347
		1.93193	1.01201	1.78437		0.948047
		1.05898	1.46322	0.514169		0.899416
		1.13732	1.10248	1.71332		0.825626
		1.49958	0.962829	1.61839		1.02247
		1.09282	2.39475	0.63366		0.765162
		0.939646	1.46154	1.58235		0.61489
		1.27872	1.02496	0.891313		1.14549
		1.63777	1.22431	1.59698		0.66452
		1.23828	1.2707	1.18443		0.969367
		0.62015	1.37578	2.09515		0.988624
		1.30815	1.82334	1.38691		0.747263
		0.817404	1.24001	1.38688		1.1209
		1.08556	1.05414	1.08085		0.804077
		1.36549	1.05422	0.700848		1.18545
		1.05849	1.64447	1.1308		0.582333
		0.405512	1.0448	1.27824		0.9775
		0.890515	1.77882	1.41758		1.31398
		1.0714	1.36085	1.17192		0.755354
		1.19018	1.3828	1.26886		0.530986
		2.14742	1.32631	1.11434		1.61169
		1.22317	0.540452	1.78448		0.826593
		1.1998	1.58825	1.4597		0.622337
		1.34987	0.405512	2.09794		0.948839
		1.29509	1.54098	0.458476		0.947736
		1.14918	1.31873	3.09059		1.39999
		1.01604	1.66715	1.04767		1.45972
		0.907023	0.839083	1.96398		1.06443
		1.84331	1.73897	2.87135		1.61051
		0.925631	0.915529	1.44291		1.44727
		1.45336	1.39344	0.543323		0.883291
		0.667968	1.70484	0.550452		1.02004
		1.10381	1.41789	0.674948		0.94068
		1.6033	1.18809	1.38867		0.966751
		1.20853	0.809128	1.51637		1.29831
		0.963235	2.41038	2.66701		1.25856
		1.15299	1.7235	1.22248		0.64144
		0.881447	1.35323	1.1646		0.871087
		1.52941	2.37498	0.991149		1.06114
		0.600547	1.97969	2.12794		0.782475
		1.28026	2.18653	1.24486		0.535262
		1.49409	1.65958	1.37269		1.1841
		1.38413	2.19161	1.02547		0.528951
		1.4423	1.57417	1.39956		1.06395
		1.50947	1.54966	1.77245		0.83181
		0.779811	1.45645	1.6945		1.17578
		1.89018	1.58399	1.38165		1.04873
		0.999281	1.11659	2.4245		0.709746
		1.6546	1.37311	0.568396		0.68334
		1.21513	1.21391	1.83367		1.1012
		1.13634	1.43308	1.92468		0.837152
		1.58792	0.64643	1.80275		0.768981
		1.2218	1.02334	1.36514		0.769545
		1.00484	1.19415	0.359056		0.652196
		1.2004	0.699096	1.37573		0.68105
		0.919464	0.983805	1.66398		1.15848
		1.33905	1.8432	3.28413		0.502535
		1.81856	1.75629	1.35251		1.40691
		1.45386	1.82842	1.24235		0.532084
		0.788786	1.92883	1.78216		1.24725
		0.451534	2.54242	1.61484		1.11702
		0.733039	1.3755	1.96077		0.654231
		0.691625	1.19416	1.14971		0.661344
		1.31948	2.07437	0.872136		0.924072
		1.24383	1.5648	0.587275		0.980648
		1.01104	2.08403	1.5194		0.677318
		0.790813	0.501331	0.888132		1.2857
		1.00469	1.79096	1.7687		0.458476
		1.27823	1.7846	0.463193		0.900279
		1.35311	0.659975	0.861006		0.443609
		1.10521	0.720773	0.877846		1.19402
		1.83135	1.26964	0.587617		0.88996
		2.4318	0.92012	0.649315		1.01842
		1.68031	1.15455	1.70531		0.451534
		0.891662	1.04869	1.48059		0.786405
		0.973201	1.30597	1.08432		0.405512
		1.42158	1.28358	2.72748		0.528951
		0.973445	1.29861	1.59367		0.753217
		0.790925	2.97562	1.80758		0.556602
		1.12798	1.41837	1.13316		0.722978
		1.07059	1.62795	0.74277		1.2849
		0.94922	1.89906	1.59808		1.14497
		1.40087	2.04329	0.411032		1.25361
		1.20039	1.27097	0.864599		0.804714
		1.92089	1.40881	1.67004		0.679706
		1.60843	1.3772	1.51053		1.27812
		0.57506	1.67166	1.94391		0.783795
		2.10813	0.945782	1.92699		0.629185
		0.969454	1.37361	0.506337		0.7194
		1.37952	2.00007	1.62321		1.06601
		1.14854	1.23236	0.677327		0.517811
		1.72603	0.725578	1.72317		1.50936
		1.76139	0.894131	0.968928		0.674229
		1.27281	0.921393	2.14734		1.26814
		1.31666	1.07546	1.46362		0.664912
		1.79289	1.01441	1.6216		0.819498
		1.27242	1.29561	2.34104		0.870656
		1.08726	1.26674	2.13786		0.359056
		0.766207	1.98262	1.46284		0.758635
		1.22776	0.987549	1.38974		1.00593
		1.7203	0.654231	0.91454		1.04857
		1.10651	1.44077	0.66427		1.34816
		1.05114	1.31705	1.41643		1.20489
		1.22587	1.44633	2.30342		0.736481
		1.28701	1.05777	1.26648		0.969255
		2.34087	1.36277	1.41226		1.29767
		0.841202	1.02848	2.23873		1.3099
		0.833679	0.765612	0.78076		1.27485
		0.831367	1.26933	1.38035		1.15168
		1.78023	0.821217	1.40418		1.17962
		1.50696	1.78042	1.59188		1.18778
		2.22926	0.736137	0.633232		1.0568
		1.41994	0.997988	1.70622		0.701093
		1.18001	1.0683	1.62417		1.09328
		1.60186	2.05844	0.964434		1.00157
		1.16784	1.62332	1.92149		0.986571
		1.39428	0.819535	0.994415		1.12093
		1.10656	1.4841	1.74412		1.28555
		1.14435	1.47476	1.69709		1.23632
		1.6221	1.06585	1.8236		1.6058
		1.62113	1.27904	2.07446		1.1827
		1.18881	1.30709	0.554457		1.07263
		0.667591	2.1408	1.66272		0.726267
		1.0632	2.60993	1.92194		1.1596
		1.53898	1.45644	1.71892		0.964502
		0.634702	1.1317	0.920162		0.930812
		1.51944	1.49679	1.02049		2.09739
		1.29299	1.17993	1.69801		0.7886
		1.39769	0.891527	0.554457		1.23593
		0.951832	1.34809	1.91653		1.03864
		1.38183	0.875199	0.359056		0.585678
		1.15827	1.59608	1.03051		0.443609
		0.969516	1.23037	1.38689		0.501938
		0.7672	2.35881	0.359056		1.19137
		1.04343	2.11697	1.21606		1.03086
		0.971609	0.783046	2.09979		0.875517
		1.21091	2.15877	1.15196		0.859199
		0.934203	1.04942	0.543966		1.04996
		1.03249	1.39466	1.23319		0.78721
		1.71394	1.37187	2.10532		1.40831
		0.686526	1.23739	1.40029		1.23817
		1.21576	1.65244	1.47559		2.21831
		1.49589	1.55322	0.735502		0.535483
		0.991116	0.501331	1.44482		1.63294
		1.21193	1.72695	2.34174		1.43562
		1.08193	1.47077	2.19149		1.09564
		0.920743	1.32802	1.77866		1.70551
		1.10215	0.959524	1.80089		1.09326
		1.44908	1.48751	2.0079		1.92091
		1.03114	1.01052	2.12527		0.753566
		1.5953	1.56253	1.41053		1.08953
		1.93808	1.51672	1.99223		0.923844
		1.46781	1.05336	2.73877		0.914847
		1.76325	1.11969	2.08405		1.40552
		1.26242	1.67847	0.542986		1.22009
		0.847584	0.766421	1.03384		0.760721
		0.769174	0.583427	0.887527		1.5971
		1.52026	1.82501	2.74003		0.749064
		0.987267	1.32311	2.1992		1.36886
		1.01569	2.32499	1.32692		0.666099
		0.899913	0.411032	0.556602		1.05506
		1.08711	1.79895	1.38973		1.03176
		1.53396	1.01002	1.53722		0.950108
		0.855356	0.451534	1.85574		1.35501
		1.57049	0.830339	1.21031		0.930882
		1.35214	1.06879	0.940794		1.02838
		0.985742	0.540452	0.661344		1.62902
		1.24116	1.17937	2.2813		0.797389
		1.27151	1.23028	0.359056		0.858193
		1.62573	0.914507	0.543323		0.963235
		1.42257	0.842083	2.07167		0.66452
		1.33854	1.36214	2.23576		2.2442
		0.900844	1.68605	1.81444		1.13343
		0.673938	0.777827	1.60138		1.05218
		1.45746	1.12447	0.458476		1.38138
		1.43203	0.735095	0.953873		0.953521
		2.08689	1.20643	2.00412		1.20599
		2.03737	1.11355	2.00319		0.967485
		1.37298	1.50747	0.988689		0.75227
		1.89782	1.27941	2.23064		1.92318
		2.18045	0.74835	1.65741		0.93266
		1.03577	1.76587	0.588366		0.922656
		1.49571	1.14002	2.58954		0.858172
		1.49457	1.16494	2.30284		0.864196
		1.32419	1.18671	1.21641		0.922253
		1.46222	0.941146	1.56378		1.70339
		1.22015	1.89061	0.776357		0.713924
		0.653155	1.44355	2.34191		1.05453
		0.784871	2.35178	2.435		0.99112
		1.36959	1.11519	1.74008		1.18881
		1.0266	1.46935	2.67933		0.526617
		0.576629	1.12368	2.01722		1.04574
		0.952157	1.14026	0.633232		0.888621
		1.14386	1.50058	2.69042		1.0013
		1.6522	1.26769	1.15794		0.67552
		1.21998	0.800431	1.5011		0.987549
		1.47886	1.90916	1.18012		1.21536
		1.25308	1.53968	1.6465		0.937581
		1.23337	1.32656	0.988806		1.42763
		0.71646	0.939303	1.50219		1.04294
		1.01144	1.08902	1.95702		0.576629
		1.66608	0.979349	1.88251		1.74991
		0.839355	1.14804	0.953228		0.723
		1.16964	0.359056	1.94444		1.33368
		1.41529	0.663849	1.52454		0.873121
		1.07029	1.33549	0.556088		1.17734
		1.6151	0.359056	2.10047		0.974223
		1.19903	2.152	1.06167		1.0008
		0.690199	1.38427	0.697774		1.29771
		1.51347	2.48454	0.917187		0.856384
		1.46754	1.62908	1.42002		1.70048
		1.51551	1.17677	1.7321		1.6148
		0.934169	1.50205	0.977251		0.580186
		0.795882	1.27284	1.89643		1.30453
		0.969669	0.971759	1.29151		0.667015
		1.22124	1.73583	1.66413		1.02478
		1.20626	1.45848	1.77426		1.15986
		1.44254	1.90247	1.47503		1.60725
		1.34057	0.948402	0.797898		0.738516
		0.924046	0.962494	1.00407		1.6346
		1.40315	1.25549	0.904972		1.10792
		1.17332	0.359056	2.18787		1.42903
		1.0433	1.37134	1.06568		1.40611
		0.766813	1.72269	2.1411		1.11642
		0.719077	0.960958	0.83865		1.35791
		1.52777	1.52721	0.836252		1.21449
		2.31705	1.24205	1.21661		1.52091
		0.741093	1.23331	0.73995		1.07462
		1.2418	1.23072	0.463193		1.06679
		1.87944	1.71746	0.543323		1.45923
		1.44702	1.03957	1.05375		1.3175
		1.04613	1.64103	0.59842		1.47454
		1.12376	0.95956	1.55565		0.812714
		1.29295	1.29629	2.51817		1.12281
		1.55501	1.17643	1.6019		1.15673
		1.65207	1.13443	1.79408		1.43114
		0.749762	1.44878	1.16284		0.917149
		1.51764	1.22388	1.41877		0.791583
		2.19536	0.630428	0.715394		0.904479
		1.41391	1.68915	0.632052		1.19617
		1.38685	1.54564	1.35203		0.949053
		1.13571	0.405512	1.30272		0.956548
		1.73952	2.07685	1.37765		1.25978
		0.979342	1.63436	1.312		0.912301
		0.677668	1.62793	1.67833		1.97577
		1.41173	1.21586	2.35881		0.866873
		0.659975	0.941402	2.24379		1.04502
		1.18419	1.65264	1.67775		2.84105
		0.837492	1.54191	1.76534		0.715303
		1.70272	1.52019	1.34484		0.661344
		0.661344	1.82867	1.41435		1.35527
		0.639778	1.01441	1.46684		0.829467
		1.27907	1.29948	0.883196		1.94057
		0.405512	1.57605	1.60601		1.53785
		0.999229	0.971928	1.42145		1.21571
		0.99977	1.22284	1.48021		1.18562
		1.28326	1.5395	1.43394		0.865494
		1.25535	1.1693	1.19738		1.29736
		1.38194	1.6659	2.29292		1.29657
		1.33343	1.97707	1.78802		1.2586
		0.676365	1.63224	1.98431		1.06389
		1.09675	0.881447	1.95873		0.961339
		1.49621	0.451534	1.57181		0.632936
		1.64318	1.39843	1.91116		2.11886
		1.652	1.73442	1.80859		0.78564
		1.52989	0.996274	1.63231		1.18247
		1.95557	1.09602	1.21237		1.65437
		1.35669	1.8399	1.65859		1.06098
		1.21762	1.01814	0.783191		1.61322
		0.405512	1.57342	1.06564		1.01547
		1.10147	0.443609	1.78402		1.05575
		1.29767	1.2666	2.18341		1.2449
		1.32527	0.894185	1.01716		1.30236
		1.854	1.4048	1.40366		1.08881
		1.59652	2.5669	0.887442		1.39497
		1.37712	1.96725	2.58273		1.22306
		1.20629	1.03223	2.00314		1.32221
			1.27363	0.802414		0.810054
			1.84176	1.68866		0.359056
			1.39954	2.26945		1.10346
			2.15517	2.02749		1.08874
			2.61694	2.38221		1.35836
			1.3848	2.36919		1.31041
			1.63748	1.76956		0.888624
			2.10027	1.62948		1.67987
			1.66056	0.963263		0.708649
			1.41676	0.906217		1.82656
			1.95037	1.15373		0.4701
			1.61311	1.81382		1.59403
			1.60814	1.58085		0.746683
			1.89874	2.11456		0.635129
			1.52024	0.71575		1.28191
			1.39549	2.3067		1.29434
			1.24078	2.42517		1.11203
			0.680204	0.629185		0.536712
			1.17945	1.29942		0.787034
			1.75602	2.47664		0.607991
			1.27484	0.700251		1.18208
			1.04356	2.01759		0.570383
			1.60584	2.15345		0.793899
			2.64026	2.11317		1.17605
			0.885881	0.857913		0.615111
			0.526617	1.84638		0.405512
			0.635608	2.4797		1.12069
			1.33259	0.411032		1.30077
			1.61316	0.689555		0.919663
			1.54704	1.8135		0.804077
			1.49388	0.645614		1.16393
			1.70782	0.970945		1.29773
			1.59138	0.405512		0.737656
			1.08902	0.764435		1.11481
			1.88084	0.719989		0.405512
			1.44508	1.43763		1.23425
			1.89507	1.7262		1.85561
			1.41364	1.0984		1.00093
			0.853438	2.03992		0.795195
			1.59566	1.51721		1.63534
			1.39419	2.53959		0.825566
			1.37209	2.44401		0.443609
			1.20494	1.46963		1.50871
			1.53917	1.10795		1.48107
			0.929918	2.20379		1.08348
			1.19538	4.03447		1.08755
			1.49335	1.3368		1.28797
			1.09053	1.23521		1.03191
			1.14384	1.43746		1.42097
			1.71261	3.42498		1.42905
			1.35408	1.9808		1.58498
			1.55959	1.78286		1.03924
			2.17209	1.3117		1.1948
			1.29049	3.0976		0.879289
			2.31984	2.03773		0.443609
			1.84914	2.20966		1.63952
			1.16964	0.540452		0.636911
			1.62512	1.80485		1.51786
			1.42869	2.34086		0.497318
			0.770046	1.73809		1.01679
			1.19233	2.18598		0.99644
			0.94572	1.82342		0.827982
			1.58059	2.11379		1.4953
			1.84289	1.31348		0.81732
			1.359	2.20994		1.31442
			1.61516	3.30924		0.874439
			1.04735	2.21055		1.14933
			1.15619	3.18989		1.25949
			1.64166	1.3177		0.847656
			0.839391	1.79765		0.947807
			1.16584	1.69763		0.935361
			1.27675	1.02687		0.784434
			1.16506	2.61405		0.845925
			1.27896	2.27094		1.06956
			1.13069	1.68946		1.08269
			1.58882	2.00127		0.632936
			1.07622	1.64729		0.88133
			1.32249	1.9416		0.701093
			1.89324	2.18984		0.764591
			1.21439	2.55512		1.42799
			1.42665	1.80249		1.17339
			1.19625	2.59173		0.837785
			1.73391	1.44235		0.781514
			0.890864	1.20816		0.798212
			2.2542	2.0138		0.359056
			1.41793	1.25213		1.358
			1.67914	1.18201		0.359056
			2.46141	2.177		0.64124
			1.31748	1.80917		0.750392
			1.72335	1.90104		0.912034
			1.63881	1.84601		1.12511
			1.16166	2.56867		1.1493
			1.57688	2.62389		1.89958
			1.28236	0.780936		1.19405
			1.31602	1.11416		0.517811
			1.23564	2.33857		1.03167
			0.942236	1.23609		1.0718
			2.13836	1.92552		0.766375
			2.19508	1.26272		0.722924
			1.16612	1.67587		0.710445
			1.18023	2.06949		1.05136
			0.8741	1.47103		0.4701
			0.4701	2.29073		0.837785
			1.79397	2.29076		1.30196
			1.94221	2.57013		0.443609
			1.03228	1.86691		1.14274
			1.04547	2.13285		1.02936
			1.93693	1.78639		0.883784
			1.54092	1.4026		1.27043
			0.845472	1.89073		0.778387
			1.90669	2.15969		0.973004
			1.86327	3.13784		1.63541
			1.14068	2.19786		0.783046
			2.03272	2.90256		1.3066
			0.64643	2.18866		1.14425
			1.29753	1.69428		0.891349
			1.42646	0.729564		1.10317
			1.24262	1.15974		0.888272
			1.54063	1.41256		0.752277
			1.83839	2.67229		0.791171
			0.954389	2.19086		0.904979
			1.07377	2.44948		0.881447
			1.88161	1.40392		0.639778
			2.39769	2.51608		0.864739
			1.24307	3.41005		0.889991
			1.27735	2.21326		1.39884
			1.32483	2.96686		0.870539
			1.23901	2.01459		1.59018
			1.29798	2.82222		1.51878
			0.909731	2.32871		1.31689
			2.71756	0.846075		1.51795
			1.88429	1.31889		1.41643
			1.63177	1.00323		1.47905
			0.653938	2.09655		0.862925
			1.03296	1.90021		0.968967
			1.43823	2.24532		0.846775
			1.96466	1.32104		0.995508
			1.76961	1.64427		0.875146
			1.10622	2.03651		0.405512
			0.923728	0.896229		1.01262
			1.46133	1.37781		0.805119
			1.1637	2.35851		0.781609
			2.11074	1.39673		1.04479
			1.11831	1.4524		1.03924
			0.681059	1.40562		0.963063
			1.37377	1.92073		1.39383
			1.4349	1.31717		0.840762
			0.526617	1.9959		0.917457
			1.62181	2.05295		0.756198
			1.72247	1.51159		1.32078
			1.57449	2.24384		0.97668
			1.02882	1.98438		0.690021
			1.88995	1.38627		0.683532
			1.12369	2.29626		1.6011
			1.83504	2.11524		0.451534
			1.55233	2.34699		1.14574
			0.977139	3.78556		1.01577
			1.06838	1.42007		0.538907
			0.862855	3.01364		0.773416
			0.991939	2.14629		1.00666
			1.31383	2.21495		1.02428
			1.06889	2.53685		1.07734
			2.19157	1.79735		0.919581
			1.30477	3.20283		1.08151
			1.53135	1.609		0.359056
			1.38717	2.32345		1.1131
			0.527271	1.88153		0.999786
			1.26123	0.76237		0.735577
			0.856983	1.98131		1.05273
			1.21794	3.30497		0.780267
			1.53781	2.25703		0.633399
			1.95331	1.99181		0.973878
			1.40012	2.18971		0.708649
			1.46568	1.56804		0.90488
			1.68947	0.914178		0.766432
			0.689388	2.40132		1.67628
			1.3065	2.34008		0.665068
			0.813845	1.32377		0.948495
			1.07898	4.41077		0.75395
			1.32165	2.2805		0.810253
			1.42476	1.2339		0.808561
			2.05172	1.08326		1.329
			1.31683	1.87688		0.585678
			1.03926	2.3673		0.604408
			1.16104	0.821865		2.07982
			1.65948	1.96317		0.658177
			0.923306	3.32426		0.593064
			1.90805	1.40616		0.66999
			1.04642	1.87871		1.07794
			1.20056	1.83527		1.20903
			1.72614	1.27163		0.876074
			1.32249	2.73001		1.28694
			1.44127	2.15295		0.713556
			1.73984	1.0576		0.792884
			0.875659	1.29316		2.12803
			1.74929	2.54044		0.99396
			0.842908	0.900266		1.61941
			1.315	3.04232		0.756758
			0.888737	2.51719		0.5781
			1.6019	0.766232		0.886723
			1.07126	1.13964		0.64124
			2.00872	2.00077		0.865819
			0.810253	2.47272		1.19055
			0.624902	1.50025		0.906643
			2.30077	1.5844		0.554457
			2.21526	0.821346		1.04773
			1.13355	1.78686		0.828029
			0.502535	0.898023		1.01814
			1.73665	1.51659		0.556088
			0.786079	0.589633		0.536712
			0.527271	3.0269		0.501938
			1.49782	0.768271		0.943623
			0.463193	1.00817		0.946269
			1.30681	2.61956		0.855356
			0.855652	2.06668		1.04149
			0.786286	2.3819		1.14972
			1.80302	2.20892		0.726501
			1.28618	1.87753		1.06725
			1.29323	3.00987		0.595236
			0.63366	1.61501		1.80595
			1.51387	1.59198		1.4267
			1.01981	0.992606		1.08877
			1.48333	4.49176		1.02942
			1.1263	2.60613		0.501938
			2.27847	1.4806		1.18675
			0.971486	3.77379		0.785777
			1.7668	1.63847		0.766813
			1.22585	2.76274		1.05937
			1.47586	1.1183		0.463193
			1.94779	1.84045		1.33609
			1.51125	3.01708		0.683802
			1.82173	2.1986		1.27423
			1.4134	2.64992		0.865289
			0.985199	2.11112		0.975198
			1.56846	2.29889		0.565221
			1.87675	2.61354		0.796499
			1.18765	2.37663		1.04362
			1.50354	1.88709		1.05117
			1.41765	1.95891		1.17912
			1.20929	2.36112		1.82895
			1.02326	3.16278		0.881243
			2.10125	3.22208		1.27224
			1.46628	3.35898		1.42672
			0.987067	1.67349		1.1723
			1.27194	1.86373		1.12766
			1.77609	1.16203		1.13958
			1.44392	1.18329		0.554457
			2.0327	2.27599		1.00239
			1.47343	2.48243		1.01878
			0.658193	2.64747		2.08819
			1.22035	1.96046		0.654231
			1.27488	2.13933		0.833612
			1.8291	2.12003		1.37214
			0.964759	0.954661		1.17555
			1.23079	2.73575		1.72732
			2.04928	2.06135		0.993437
			1.22458	1.83333		0.73995
			2.13279	1.69117		1.20671
			1.57034	2.54914		1.56463
			0.798865	1.82884		0.787555
			1.76644	1.54144		0.888492
			1.49945	1.06829		0.837785
			0.924603	2.44567		0.816599
			1.21026	1.48194		0.956906
			1.27593	2.75952		0.501713
			1.10501	1.2557		0.623797
			1.53765	1.45237		1.24214
			1.45868	0.776242		1.22179
			1.2025	2.51376		0.75352
			1.1153	1.32147		0.501331
			1.37961	1.50952		1.05199
			0.411032	1.45404		1.27442
			1.31669	1.50277		1.2025
			1.05985	1.74308		0.832492
			1.83162	1.26869		0.804714
			0.897131	1.95573		0.987267
			1.02245	2.6426		0.514169
			1.20284	1.60504		0.577448
			1.69241	1.52461		0.576629
			1.9252	1.60335		0.948875
			2.86778	2.49585		1.50695
			0.990793	2.10005		0.664546
			1.77928	2.13942		0.828613
			2.06517	0.937536		1.08354
			1.59344	2.46004		1.13008
			1.07144	2.96424		0.887653
			1.62307	2.99808		1.06227
			1.68138	2.24353		1.23092
			0.55813	3.641		1.37274
			1.69245	1.85034		0.700192
			1.20149	2.55337		1.55924
			1.41397	1.89254		0.945853
			0.789309	1.1642		1.35531
			1.05899	2.79276		0.605544
			1.69303	2.11669		1.04186
			1.93501	2.06351		2.01684
			1.08856	1.97577		1.27824
			1.08006	2.83449		1.48647
			1.34592	2.80205		1.06766
			1.22768	2.22795		0.99866
			0.580186	2.76601		0.529698
			1.1885	2.06618		0.926631
			1.28334	1.8002		1.83527
			1.54007	3.03372		0.82397
			1.34161	1.8084		0.722924
			1.56446	1.9265		0.97315
			0.763135	2.49603		0.672276
			1.95563	1.69573		1.15335
			1.85848	1.94167		1.0714
			0.840203	1.97423		0.476971
			1.51503	2.30983		1.46439
			1.4198	1.59021		1.03659
			1.2553	2.49473		1.73694
			0.954784	2.24863		1.08343
			1.25897	2.69531		1.19654
			1.4896	2.43383		1.36302
			0.964974	2.66407		1.09742
			1.91083	2.00438		2.44243
			1.56052	1.86962		1.2025
			2.09803	1.49825		1.11732
			1.43188	1.42438		0.654231
			1.19071	1.75895		1.04177
			1.91671	2.43928		0.765954
			1.53914	1.29005		1.15053
			2.03464	1.82585		1.87488
			1.31198	1.66412		0.587617
			1.91317	2.26407		0.535262
			1.01075	3.04471		1.1131
			1.43861	1.55305		1.1651
			0.735212	1.00674		0.702823
			0.911523	1.68029		0.621972
			1.50641	1.90344		0.912751
			1.33088	2.05297		1.26321
			2.15903	1.89625		1.17138
			0.85524	2.51268		0.809132
			1.19502	1.64834		0.766207
			1.57299	1.41652		0.812918
			1.31394	0.443609		0.949836
			1.99623	1.98799		0.655974
			1.67788	2.09783		1.30784
			1.24232	1.65008		1.06323
			1.05254	2.10062		0.9311
			0.828816	1.76513		0.911523
			1.20538	1.79744		1.0757
			2.08455	1.42959		1.14579
			1.53065	2.07268		0.514169
			1.38659	1.70785		1.40602
			1.05734	4.07768		1.46109
			0.866797	1.98269		1.33228
			1.76228	2.5512		1.502
			0.927027	2.07254		2.07672
			1.3967	3.01021		1.36509
			1.24036	2.5635		0.920773
			1.15435	1.43563		0.4701
			0.718282	3.16538		1.02812
			1.75771	1.49016		0.790055
			0.728896	2.04383		0.847487
			1.72432	2.85259		1.04149
			0.762375	1.00942		0.4701
			1.31675	1.24562		1.50962
			1.10522	1.84953		1.62634
			1.15462	1.45493		1.67734
			1.64767	2.03892		0.736819
			1.03367	1.31693		0.359056
			0.765744	2.01794		0.920069
			1.07748	2.19004		0.648403
			1.46259	2.59473		0.910184
			1.84446	2.16877		0.957062
			1.04291	2.67523		0.642759
			1.06339	2.54143		0.716575
			2.39213	1.02493		1.24252
			1.72185	1.98475		1.29655
			2.13418	2.93658		0.698307
			1.41237	1.76009		0.884854
			2.15722	3.54139		0.359056
			1.91796	2.07294		1.0349
			1.44952	1.81855		0.648888
			1.42174	0.626728		0.476971
			1.61336	1.70057		0.887746
			1.3921	1.24289		0.654231
			2.14591	2.12608		0.740855
			1.01903	1.3599		0.607991
			1.93376	0.887917		0.501938
			1.06653	1.98039		0.664907
			0.969965	2.04268		0.443609
			1.40752	1.67805		1.0172
			0.709351	2.02208		0.608945
			1.67531	2.35111		1.06843
			1.35793	1.94433		0.642759
			1.32518	1.96392		1.34165
			0.859174	2.62018		1.21035
			1.44045	0.818608		1.02025
			1.14151	1.73542		0.862792
			1.21546	1.39882		0.713556
			1.04535	1.22636		0.359056
			2.10762	0.639474		0.854312
			1.86884	1.58479		0.666234
			1.42742	2.14035		0.616299
			0.899416	2.37904		0.860464
			1.62947	1.62559		0.359056
			1.94526	1.67237		1.03751
			1.71711	2.54418		0.973599
			1.62256	1.53069		1.03915
			1.24832	2.24224		0.73933
			1.5367	1.86907		0.906219
			1.09483	1.45819		0.593064
			1.35585	1.99056		0.690199
			1.40294	2.7324		0.818608
			0.948047	1.77518		0.529698
			1.22146	2.36395		0.526617
			1.73286	1.67102		0.411032
			1.41105	1.46426		1.102
			0.998765	2.53848		1.15308
			1.08474	2.28873		1.04903
			1.30112	1.70415		0.405512
			1.23272	1.41888		0.727357
			1.90113	1.49208		0.660168
			1.32954	2.85763		0.451534
			1.00911	3.79222		1.08129
			2.11266	1.13101		0.443609
			0.824892	2.16108		1.50465
			1.36892	2.21254		1.45616
			1.22798	2.36475		1.60944
			0.687436	1.84337		0.955709
			1.2869	1.81021		1.40462
			1.30177	1.09189		0.685347
			1.17662	1.43512		0.938849
			1.52544	2.17056		0.724823
			1.33812	0.502535		0.439878
			1.02736	1.00355		0.576629
			1.93063	1.89093		0.925593
			1.62391	1.50826		0.788291
			1.22054	2.54718		0.585778
			1.27687	0.728909		0.722924
			1.15181	2.6988		0.756411
			1.96502	1.91011		0.742793
			1.0514	1.11652		0.618375
			1.02314	1.90665		1.36164
			2.18097	2.75198		0.848761
			0.997593	2.14421		0.737307
			1.94479	2.07405		0.920357
			0.766534	1.18091		0.908529
			0.514169	2.66838
			1.17641	1.45981
			1.02955	2.157
			1.33286	1.75314
			1.00699	1.39793
			1.4564	2.20033
			1.76563	1.99415
			2.07641	0.502535
			1.76339	2.04167
			1.37617	2.03636
			2.2174	2.66901
			2.3697	0.753465
			2.00986	1.92709
			1.37613	1.97496
			1.13269	1.311
			1.33473	2.19831
			0.879925	1.75801
			1.33428	3.06546
			1.52431	2.24341
			1.03415	1.7055
			1.80512	1.26107
			1.55269	1.26301
			1.52644	2.13978
			1.14718	2.71517
				1.98519
				3.24608
				1.39512
				1.69804
				1.57849
				1.69631
				2.69029
				1.78589
				2.4772
				1.31615
				1.21691
				3.21992
				1.49615
				1.55734
				1.57224
				1.84865
				2.12126
				1.95759
[truncated: 1,373 more rows]

## Sheet: Fig. sup. 4B
30 min cell volume - phase 2
	Control	PA(11)	VAN(20)	PA + VAN(10)	PA + VAN(20)
	1.40682	1.57854	0.849129	2.04705	1.56586
	1.80691	1.88588	1.84945	1.34229	1.46285
	1.74586	0.924029	2.98612	1.05355	1.92441
	1.65662	1.71091	3.68821	1.45622	1.11571
	1.80248	0.984587	2.5719	1.39739	1.32004
	1.86412	1.83554	1.76382	1.18027	1.01673
	1.72281	1.56058	2.23354	1.35654	1.71324
	1.6671	1.35249	2.24162	1.96035	2.04922
	2.67198	1.36132	2.07656	1.72722	1.86415
	1.90918	1.64406	2.46797	1.00944	1.6879
	1.4212	0.962191	2.25316	1.35537	1.18956
	2.2895	0.921834	1.95683	1.18417	1.03287
	1.47068	1.2109	0.703305	1.20886	1.55962
	1.64003	1.83207	1.6229	1.21971	2.16368
	2.17418	1.30423	2.23382	0.763828	1.97805
	1.51128	1.30593	3.36418	1.43374	0.964968
	1.07546	1.70649	2.03651	1.16263	1.47351
	1.33107	2.16151	3.07671	0.987267	1.25987
	1.03819	0.932013	2.06107	1.16492	1.83246
	1.39132	1.2337	2.22653	0.959869	1.13601
	2.13172	1.56669	2.35113	0.823003	1.5512
	1.51788	1.92877	1.89754	1.75007	1.15447
	2.90503	1.99082	1.18157	1.52735	1.50044
	1.37103	1.82134	2.25705	1.43534	1.76012
	1.51481	1.25188	1.54787	1.84463	2.3908
	1.19346	1.75227	2.16224	1.78469	1.88219
	1.72026	1.44115	1.97475	1.42297	1.45753
	1.06396	1.27617	2.03758	1.64613	1.67172
	1.55979	1.29353	1.92555	0.840042	1.37099
	1.57917	1.3872	1.76834	1.45483	1.63205
	1.68308	1.96717	2.05843	0.884854	1.26294
	1.65191	2.36839	1.91631	0.775864	1.88959
	0.990941	1.35149	1.24262	1.1112	1.15118
	1.61336	1.34262	2.23214	1.09467	1.08178
	2.23552	1.9823	2.27989	1.25434	1.15954
	2.03786	1.47054	1.64856	1.49511	1.18961
	1.53847	2.54003	2.4495	0.928392	1.47367
	1.85911	0.954386	3.20936	1.16069	1.07993
	2.23622	1.18649	1.98779	1.59395	1.36647
	1.09965	1.59043	1.92451	1.6345	1.4144
	1.52964	1.34946	1.97736	1.00617	0.943788
	1.48234	1.26053	1.76958	0.927164	1.29036
	2.24213	1.72468	2.39889	1.9593	1.68137
	1.77555	1.62795	2.87011	1.55229	1.35392
	1.65439	2.29111	1.17504	1.51231	1.40362
	1.48984	1.20517	1.22413	1.23371	2.15019
	2.00276	1.89979	2.37622	1.40917	1.06832
	1.38202	1.32351	2.59011	1.06203	2.13528
	2.28545	1.11769	1.65833	1.30784	1.22538
	1.99324	1.59052	2.80378	1.92711	1.88255
	1.67318	1.8888	1.74817	1.69384	1.43757
	1.61768	1.63935	1.72753	0.99764	1.53617
	1.11541	2.0263	2.45845	0.713782	0.942575
	1.92571	1.56649	2.47994	1.25616	0.906662
	1.57966	1.98878	2.08085	1.00349	0.888297
	1.42786	2.31336	2.35799	0.884854	1.24831
	1.09737	1.59728	3.39161	1.3998	1.55599
	1.97826	0.870169	1.6063	1.25657	0.815103
	1.57441	2.23431	2.83837	1.01222	1.07004
	1.89936	1.72186	1.93431	1.25611	1.29954
	2.69647	1.25334	2.06315	0.828864	1.50547
	1.84535	1.62362	2.04984	1.50003	1.16937
	2.08003	1.47344	1.64282	1.53835	1.37829
	1.55097	1.53095	2.1565	0.635608	1.22384
	2.43133	1.55581	2.75733	1.5527	1.00581
	2.00801	1.57431	2.52053	1.42662	1.17304
	1.27452	1.16446	1.55404	1.18302	1.30162
	1.76975	1.561	1.97747	0.781609	0.854505
	1.59614	2.73588	3.15103	0.969292	1.72518
	1.749	1.6403	2.30962	1.15882	0.983289
	1.63822	1.70035	2.79135	1.52673	1.27301
	1.87331	1.90101	1.2417	0.888724	1.26339
	1.65984	1.44123	1.84609	1.19605	1.20132
	2.32916	1.88597	1.69818	1.0429	1.02567
	2.26528	1.27491	2.13479	0.866403	1.21844
	1.38599	1.76354	2.22406	1.05485	1.72038
	2.31893	0.842303	3.08363	1.97738	1.23507
	3.00784	1.18162	2.03296	1.95725	1.16036
	2.35216	1.38744	1.98095	1.13739	2.18956
	1.54245	1.14571	1.27498	1.203	1.37177
	2.13164	1.59994	1.5313	1.16509	1.19874
	1.16964	1.31479	2.9844	2.35862	1.18067
	1.9941	1.32321	2.39151	1.10308	1.34404
	1.67086	1.34781	2.33822	1.08543	1.17008
	1.75971	0.761538	2.61151	0.814647	2.55735
	1.69646	1.7798	2.40326	1.04245	1.16125
	1.95128	1.38797	1.14748	1.31318	0.750172
	2.02645	1.76915	2.32468	0.794852	1.80926
	2.2787	1.61336	1.8659	0.746605	1.07601
	1.91788	1.62027	1.37128	1.17506	0.663584
	1.62178	1.12715	1.99396	1.47754	0.710039
	2.18657	1.41972	2.03897	2.29275	1.04646
	2.06007	1.00843	3.08031	1.75209	1.51278
	1.6461	1.5321	2.39655	1.21381	1.07725
	1.70885	0.587617	2.17287	1.10302	0.946819
	1.76454	1.13482	2.67437	1.43423	1.90571
	1.54211	3.1649	2.87336	1.56503	1.28364
	2.2671	1.55792	2.38655	0.731001	1.12058
	1.29673	0.939615	2.25923	1.71185	1.52
	2.45043	1.15317	2.86679	1.06838	1.32926
	1.49181	1.14756	1.74196	0.906214	2.10094
	1.69522	1.34324	2.43524	1.41139	1.65224
	2.22051	0.726053	1.43732	1.41543	1.82138
	1.92761	1.73995	2.91639	1.31656	1.2996
	1.75893	1.17838	1.76737	0.936632	1.3719
	1.23644	1.59371	1.87905	2.13906	1.86457
	2.12148	1.5167	1.3794	1.10275	1.17694
	1.76029	1.59747	2.13786	1.57662	2.11922
	1.6068	1.2093	2.31375	1.50145	1.39652
	1.76553	0.966704	2.93126	1.21213	2.01673
	2.26586	1.14257	1.74042	1.13561	1.16193
	1.79382	1.99116	2.21076	1.30091	0.910245
	1.91982	1.30187	3.2498	1.81288	0.832721
	1.44962	0.918328	3.0743	1.26146	3.01435
	1.33088	0.832462	2.00479	0.770082	1.14734
	0.769573	1.10998	1.9519	0.886971	0.833089
	1.71401	1.41394	2.11078	1.02295	1.03527
	2.21761	1.79452	3.38745	0.929797	1.39833
	1.88817	1.66226	1.41493	0.89922	1.92269
	1.44865	1.00212	2.27515	1.42212	2.02314
	1.75957	1.77987	2.34391	1.56423	1.19943
	1.80015	1.41483	3.74353	1.47567	1.50656
	1.57398	1.28869	2.38772	1.80335	1.30561
	1.90594	0.941714	1.82644	1.62739	1.41248
	2.38419	1.33763	2.70523	1.22208	1.26852
	1.57557	1.19114	1.46107	1.08206	1.52215
	1.26096	1.50902	1.69902	1.08268	1.23644
	1.82463	1.85288	1.49065	0.773079	1.81018
	2.08399	0.861746	3.59054	1.62178	1.17228
	1.73546	1.16323	2.12636	0.848761	1.01436
	1.73591	0.95175	2.04219	1.2792	1.11724
	2.02084	1.43763	2.80696	0.976888	2.32774
	2.19179	1.74161	2.46845	1.06549	0.959421
	2.67047	1.22909	1.84578	0.604408	1.12976
	1.38185	1.62929	2.25767	1.55724	1.10988
	1.75673	1.2025	2.69291	1.16863	1.63808
	1.68954	1.71508	2.4606	1.75312	2.07954
	1.89304	1.87396	2.52062	1.25317	1.18545
	1.49188	1.12234	1.14867	0.973599	2.16369
	1.75173	1.83136	1.93247	0.821664	1.71204
	1.34679	1.84286	1.67978	1.35858	1.37982
	1.95997	1.90247	2.013	0.801666	1.31783
	1.54612	1.13184	1.65042	1.77465	1.87942
	1.99603	1.51889	2.65664	1.18292	1.1968
	1.52436	2.18504	2.06776	0.983478	1.53709
	1.30966	0.860064	2.73292	0.708649	1.57703
	1.36851	1.99161	1.54365	0.873569	1.03218
	1.29489	1.92549	1.53137	1.11591	1.3381
	1.61822	1.11604	1.60361	0.932748	1.97324
	1.04579	1.11009	2.38544	1.06549	1.25685
	1.18918	1.45278	2.14043	0.922569	1.21496
	1.54151	1.45029	1.39824	1.12963	1.63328
	1.68774	1.36639	2.20455	0.685789	1.21327
	1.91715	1.19004	2.90891	0.920849	1.48438
	1.68818	1.78001	1.87952	0.676365	1.42292
	1.52453	1.24509	2.61633	0.981822	1.25193
	1.43445	1.42272	2.09888	0.928073	1.24622
	1.92335	0.987549	1.4444	2.28654	1.19668
	1.80253	1.23939	2.02552	1.39418	1.11122
	2.56429	1.79731	1.67477	1.85381	1.30459
	1.64573	1.76826	1.77194	1.33926	1.65041
	0.902809	0.978097	1.77068	1.08878	1.20886
	1.48371	1.35218	2.905	1.4768	1.35076
	1.43761	1.30844	1.80782	1.33895	1.52996
	2.39222	1.7145	2.91165	1.5128	1.08365
	1.38137	1.23106	2.27385	1.09068	1.32503
	2.27496	1.25064	3.70903	1.32322	0.733266
	1.06287	1.16413	1.60014	1.19428	0.981822
	2.0808	1.64885	1.56277	1.32522	1.50283
	1.75227	0.897739	1.98695	1.9161	1.73695
	1.46676	0.955062	1.84912	1.32508	1.37866
	2.05058	0.986041	2.58781	1.30321	1.17978
	1.89755	2.12589	3.4448	1.33093	1.49994
	1.43951	1.74668	2.39406	0.556088	0.776654
	1.37728	0.987708	3.33438	0.682465	1.13687
	2.35237	1.40111	2.27756	0.936305	1.47926
	1.0286	1.99705	2.2681	1.1929	1.53095
	2.20804	2.03131	1.51102	0.809181	1.15837
	2.25957	1.32331	3.43419	1.35527	1.851
	1.65756	1.08553	2.45087	1.15243	1.51937
	1.40148	0.946753	1.77886	1.50969	1.1839
	1.64474	1.59993	2.75588	1.37468	0.993332
	1.48992	2.04172	2.5052	0.501938	0.750222
	1.70018	1.14983	2.48777	0.910786	0.757795
	1.92589	1.66648	2.70274	2.14747	1.36543
	1.95708	1.01507	2.26036	1.26846	0.875576
	1.73241	1.519	2.69774	1.00207	1.02871
	1.04478	1.13619	1.98049	0.789892	1.21437
	1.62698	1.18568	2.86969	0.910898	1.03286
	1.46536	1.06956	2.31846		1.14582
	1.64205	1.61598	2.00964		1.24145
	2.18765	1.39186	2.58018		1.3215
	1.40116	0.964044	2.03161		1.46217
	1.95997	1.57771	2.82802		1.01512
	1.43217	0.91428	1.76177		2.17745
	2.7607	1.29862	2.33335		0.833382
	1.83324	1.52718	1.8351		2.38974
	1.79428	1.28085	1.941		1.03621
	1.63227	1.86712	2.39737		1.72897
	2.08376	2.26971	1.11394		1.77778
	1.92018	0.768268	1.6453		1.67975
	1.71849	2.02092	1.61059		1.0434
	1.81484	1.96074	2.17169		1.01295
	1.52326	1.39119	2.22117		1.26843
	1.84338	1.9307	2.94482		1.26464
	0.802414	1.47627	1.08748		1.16924
	2.28647	1.34947	1.67412		2.10994
	2.41731	1.39969	2.54415		1.20084
	1.46682	2.10626	2.24375		1.15739
	1.62367	1.78647	1.87182		1.16659
	1.47196	1.26021	1.48261		1.69328
	1.89011	1.75621	1.54922		1.17008
	2.05497	2.01026	2.95907		1.58705
	1.27534	2.33066	2.2085		1.21515
	1.61354	1.18534	2.37448		1.34673
	1.97355	1.60686	1.70307		0.89537
	1.37701	1.11318	1.86058		1.42974
	1.83211	1.00726	1.94188		1.33201
	1.46568	1.67624	1.77239		1.54449
	1.34393	1.33793	1.79185		1.39059
	1.37638	0.995388	1.56903		1.21864
	0.766311	1.75128	3.02067		1.34567
	1.28245	1.99324	1.89699		1.10704
	1.38044	1.14427	1.84173		1.95339
	1.65762	1.48055	2.1048		1.2109
	1.56841	1.65359	2.04299		1.46944
	2.00007	1.25664	2.11792		0.927644
	0.692314	1.37185	0.693782		0.82226
	1.83369	2.07301	2.65189		1.43556
	1.83127	1.76534	1.57171		1.98543
	1.53787	1.54647	2.1348		1.65716
	1.69174	2.01483	2.16233		1.56527
	1.71561	0.894948	2.57705		1.54696
	1.86607	1.97102	1.7904		1.18296
	2.59006	2.61622	1.36323		1.03186
	1.95997	1.41592	2.57218		1.19129
	1.60268	1.47956	1.24983		1.30734
	2.02286	1.92636	3.31569		1.45823
	0.960753	2.64927	1.20622		1.6066
	1.28751	1.50856	2.14773		1.19954
	1.6019	1.36099	1.70992		1.25975
	1.41659	2.23097	2.82452		1.26832
	2.5216	1.98897	2.36467		1.02074
	1.34903	1.98801	2.95711		1.08705
	2.37495	1.43353	1.18752		1.16255
	1.78211	1.61643	2.57928		1.07352
	1.97312	2.61707	2.4555		1.15316
	2.27606	1.35794	2.11371		1.13266
	2.20834	2.79077	2.29595		1.97348
	1.20986	1.84667	1.15341		1.05441
	1.00904	1.35676	1.35769		1.25897
	1.79997	1.11536	2.70748		1.1146
	2.14438	2.33201	1.93054		1.58872
	1.66041	1.08357	1.71468		1.41347
	1.51888	2.56761	2.24712		1.99394
	1.84694	1.94924	2.58814		1.2714
	1.51007	2.42089	1.44675		1.02286
	2.1999	2.04687	1.62797		1.31204
	1.60292	2.00762	2.60731		0.63548
	1.83965	1.74458	2.11118		1.63198
	1.73473	2.96312	1.71732		1.13221
	1.39784	1.62126	2.09531		1.23658
	1.44134	3.16507	1.93979		0.953658
	1.52952	1.90561	2.06343		1.95889
	0.963015	1.75891	2.44182		1.14219
	2.4036	1.28173	1.70546		1.6865
	1.84249	1.14858	1.98499		1.24848
	1.6595	2.10377	2.44814		1.20991
	1.59303	1.64066	2.1728		1.93141
	1.93553	2.828	3.0237		0.94648
	1.09946	2.00891	2.19719		0.881619
	1.73916	1.18217	1.91795		1.06046
	1.67631	2.2476	1.76219		1.14306
	0.965475	1.57597	2.17187		1.57045
	2.07425	1.70525	1.65556		1.47365
	1.70526	1.29072	2.99011		1.63621
	1.98623	1.51123	1.81458		2.10206
	1.12924	0.875665	1.84442		1.24632
	1.44521	1.92466	4.47531		1.35994
	2.0225	1.49172	1.81247		1.00832
	1.88719	1.56628	2.5154		1.1394
	1.71853	1.57779	2.45718		1.0433
	1.92049	2.96631	3.38643		1.45015
	1.95953	3.31088	1.31482		1.50227
	2.01468	1.97463	2.20289		1.31096
	1.85845	0.916538	1.3129		0.847468
	1.80461	1.95675	1.32229		1.70398
	1.94563	1.59603	2.30055		1.4899
	2.22274	2.14444	3.06087		1.07544
	2.50082	1.96927	1.55632		1.75591
	1.92892	1.47833	3.39489		1.46882
	2.0225	2.15805	1.38074		2.01075
	1.53564	1.39911	3.1894		1.43475
	1.72245	1.4582	2.3152		0.964974
	1.63812	2.81074	1.36119		1.56254
	1.55188	1.69343	2.47012		1.2327
	1.5705	2.07367	3.71922		1.34004
	1.66201	1.90855	2.98616		1.44049
	1.37269	1.83751	2.26514		1.98524
	0.959723	1.80788	1.96544		1.54217
	1.96944	2.54647	3.34677		1.37594
	1.45868	1.78746	1.28588		1.64029
	1.37066	1.94213	1.95705		1.4418
	1.77937	1.35511	2.23255		1.15094
	1.42976	1.13146	1.39568		1.11382
	1.15146	1.24054	3.05875		0.787692
	2.52902	2.84137	2.37659		1.48394
	1.7023	1.72698	2.89009		1.06174
	1.6692	2.91716	1.71943		1.44214
	1.66319	2.05355	3.47033		2.17716
	2.37013	2.52678	2.01108		1.62855
	1.3995	1.43728	2.31411		1.04151
	1.44477	2.70991	1.87563		1.2484
	1.47557	1.42775	2.56537		1.79217
	2.53261	1.89526	1.96393		1.42328
	1.55214	1.6609	2.74513		0.764664
	1.91093	1.50579	1.88288		1.35686
	1.87606	1.1916	2.47421		1.29853
	1.52563	2.53469	1.89841		2.28349
	1.52499	1.86703	1.56452		1.27777
	1.38234	1.80818	1.67928		1.44595
	1.86942	1.58734	3.45892		2.36069
	1.64615	1.39134	1.54778		1.88658
	1.84702	1.61391	1.52403		1.81048
	1.9563	1.38168	2.35277		0.812586
	1.53366	1.91196	2.27416		1.29364
	1.85763	1.75711	1.46182		0.664907
	1.4609	1.87928	2.06073		1.44149
	2.37541	1.72683	1.94641		1.44114
	2.02107	2.17887	2.24308		1.26793
	2.27557	1.45271	2.30362		1.55966
	1.37719	0.987634	1.70079		1.28048
	1.10443	1.72288	1.79544		1.21858
	1.98428	1.53668	2.64826		1.48483
	1.90265	2.22676	1.85657		0.944406
	1.7983	2.48275	1.84217		0.972717
	2.0225	1.9507	1.73265		0.907548
	2.6809	2.41082	2.46404		1.03191
	1.54069	2.2479	2.19607		1.06826
	1.42335	1.82856	2.67999		1.75295
	1.88506	1.58314	2.67179		1.2088
	2.14486	1.38144	1.85655		1.39132
	1.09095	1.8179	1.60249		0.897587
	1.1853	1.35067	3.1966		0.935389
	2.83232	1.77115	2.7252		1.24171
	2.26941	1.2814	1.86043		2.15392
	2.01903	1.7449	3.05249		1.08319
	1.39052	1.657	3.20391		1.41598
	1.99323	2.17184	2.70115		1.22657
	1.91868	1.5806	1.71684		0.958214
	1.18881	2.55521	1.78715		1.3974
	1.46687	1.01773	3.73678		2.82091
	1.68232	1.52123	0.921795		1.19975
	1.57793	2.48756	1.88467		1.07896
	2.16756	1.56164	3.24859		0.865701
	2.01139	2.47715	2.27102		1.0037
	1.3488	1.46	1.61881		1.53913
	1.98304	1.3474	2.67429		0.863894
	1.74256	1.45814	0.817404		1.05355
	1.92057	2.39697	1.24367		1.65545
	1.41815	1.56814	2.08409		0.85847
	1.75396	2.71236	2.12433		1.01677
	1.70551	1.7334	2.48048		0.90321
	1.88891	1.42604	1.6096		1.15837
	1.68631	1.69085	1.69361		1.33219
	0.896835	2.88663	2.51314		1.42246
	2.28897	1.88793	1.65408		1.46568
	1.01373	1.15534	1.97475		1.8018
	1.55059	0.891883	1.46664		1.41076
	1.68857	2.1225	1.72922		1.32915
	1.24972	1.91226	2.69086		1.11162
	1.88594	1.53388	2.86808		0.955671
	2.16206	2.22053	4.00081		0.994554
	2.50434	1.43856	1.52184		1.27722
	1.6345	1.68181	2.98665		0.94484
	1.69513	1.24954	2.39271		1.36605
	1.77018	2.64936	2.60514		1.96506
	1.85849	1.98336	2.79173		1.60025
	1.53277	1.46687	1.6196		1.19004
	1.39373	1.41272	2.39389		1.22349
	1.53965	1.43481	2.66585		1.21263
	1.35132	1.26429	1.64979		1.05257
	1.43217	1.12277	1.60014		1.26903
	1.53211	1.99851	2.89539		1.31531
	1.48903	1.24732	2.35155		1.3066
	1.40646	0.836845	1.68433		1.14887
	2.1282	1.85252	2.99189		0.92324
	1.42245	2.08471	1.37401		0.822232
	2.01783	1.26991	3.5657		0.808283
	1.30594	2.04114	1.46532		1.43535
	2.15449	1.31022	1.65068		1.38636
	1.59377	1.84627	1.21373		1.13109
	1.8321	1.65765	1.48553		1.17133
	1.80604	1.60544	2.21995		1.35086
	1.75163	2.15229	1.53931		1.56865
	1.90416	1.58086	2.29663		1.03183
	1.91978	1.8075	1.25697		1.23631
	1.53177	1.30577	1.96729		2.04239
	1.78326	2.05701	1.96149		1.44059
	1.29442	3.1154	2.86793		1.89594
	1.36893	2.58859	1.95995		1.75298
	1.99531	1.67346	1.73278		1.36725
	1.00937	1.46166	3.0006		1.17497
	1.29704	1.78478	2.62459		0.754769
	1.65731	2.11312	1.95935		1.9858
	2.15368	1.34517	1.45414		1.2626
	1.76711	1.53779	2.0414		1.20009
	1.55554	1.47523	2.28454		1.27824
	0.893304	2.54083	1.81048		0.852266
	1.7029	1.86154	1.94016		1.00127
	1.69854	2.02596	2.37417		1.18676
	2.30019	1.64165	3.20012		1.27501
	1.25579	1.50814	3.26505		0.914271
	1.63276	2.10087	2.06678		0.458476
	1.93068	1.2735	2.56763		2.18988
	1.48908	1.29711	1.95543		1.26969
	1.79562	2.85569	2.86582		1.7802
	1.23723	2.07347	1.70895		1.18296
	1.50071	1.85624	3.95822		1.41985
	1.16707	1.87281	3.21031		1.15376
	2.17131	3.65827	1.75834		0.920106
	1.80836	2.64442	2.0325		0.965425
	1.87004	1.70437	2.28681		1.4841
	1.46611	1.67865	2.02267		0.991232
	1.61641	2.79539	1.64355		1.67999
	1.10911	2.10821	1.6157		2.17829
	1.46276	1.31462	2.77985		1.95101
	2.9853	2.07871	2.58		1.29009
	1.27024	1.93614	2.13192		0.820803
	2.00284	2.45781	2.35641		1.35781
	1.54772	2.03845	2.97533		1.14693
	1.46845	1.99357	2.6508		1.58791
	1.192	2.21916	1.84301		1.39341
	2.22642	1.8503	3.01804		1.32151
	1.6351	1.45353	1.48741		1.41189
	1.46085	1.85823	2.25434		1.24108
	1.03911	1.60474	1.60899		1.59949
	1.62607	1.61078	2.02483		1.85553
	1.94782	2.08108	2.39335		1.36423
	2.06585	2.35594	1.33238		1.33651
	1.6408	1.55565	2.72309		1.88737
	1.35281	2.55629	2.43228		1.7746
	1.81323	1.03863	2.99218		1.27557
	1.35038	2.51314	1.73699		1.51766
	2.16034	1.85765	1.45477		1.69002
	1.1233	1.75836	1.90577		1.29271
	1.18033	1.72474	1.26863		1.24168
	1.47063	2.30748	3.54712		1.53502
	1.61097	1.92878	3.27624		1.44365
	2.12128	1.64208	2.21437		1.52236
	1.9127	2.08814	2.74439		1.22766
	1.25679	1.83492	1.87046		1.4411
	1.52259	1.62132	1.2735		1.59751
	1.9983	3.63846	1.06979		1.29267
	2.05046	2.22171	2.69011		1.32548
	2.53871	1.50637	2.25162		1.67894
	2.07789	1.99733	2.52566		1.40961
	2.23387	2.54886	1.30742		1.15859
	1.58192	1.77559	1.43928		1.28093
	1.98634	2.20039	2.83251		1.27863
	2.903	1.5219	2.89141		1.32364
	1.20966	3.06302	2.92788		1.28838
	2.16797	1.91099	2.28279		1.12353
	2.08915	2.44112	1.34007		1.28188
	1.53937	2.25166	1.21134		1.23286
	1.00274	1.64468	2.45313		1.68176
	1.41375	2.52754	1.47272		1.66319
	0.914178	1.95427	2.54872		1.63132
	1.13555	1.00269	1.70338		1.48447
	1.91765	1.88777	1.60763		1.3632
	1.82153	1.89185	2.77312		1.31049
	1.08394	1.7392	2.39912		1.30839
	1.47351	1.9999	2.74851		1.8563
	1.45855	2.29922	1.78583		1.52041
	1.19502	1.62103	2.38586		1.26745
	1.88794	1.59396	2.58218		1.73627
	1.61215	1.41404	2.6347		0.854487
	1.14892	1.42708	2.26695		1.25263
	1.45123	2.12882	2.98076		0.986971
	1.21833	1.70724	2.59771		1.91667
	1.43547	2.09047	2.70455		1.65339
	1.51491	2.66805	1.71083		0.882829
	1.60839	1.70724	1.56518		1.71352
	2.69245	1.81593	2.51392		1.22991
	1.39232	1.97782	3.18657		1.51242
	1.34346	3.17424	2.72864		1.17826
	1.80822	1.97488	1.59812		0.976208
	1.60267	1.16002	3.87188		1.01844
	1.21001	1.41901	0.874825		1.10983
	1.27712	2.34363	2.73603		1.16041
	1.58601	2.32595	3.31731		1.5377
	1.36358	1.68226	2.2377		1.71359
	1.02761	1.49309	2.54628		1.21248
	1.29653	1.26235	2.82219		1.69887
	1.98046	1.7058	1.84744		1.57306
	1.85042	1.43864	1.67124		1.36004
	1.62797	1.5563	3.04773		1.03293
	2.7248	2.509	1.46746		1.47274
	1.82766	1.34003	1.77304		1.45473
	1.7454	1.66093	2.00829		1.62198
	1.23316	1.86441	2.83986		1.67444
	1.32882	1.78888	2.87495		1.63391
	1.41534	1.31447	1.66773		1.09549
	1.58955	1.25922	1.22184		1.28072
	1.70302	3.07203	2.8211		1.2283
	1.26568	2.06056	2.03966		2.48514
	1.37138	1.07754	2.08657		1.04113
	1.42201	1.65917	1.91373		1.66493
	1.31453	2.42858	1.79738		1.3152
	1.27691	1.90025	2.39505		1.03044
	1.4628	2.02794	2.25897		0.890919
	1.82272	1.34597	2.16327		1.75182
	1.45901	2.09289	1.34632		1.86497
	1.9869	3.03765	2.8172		1.62234
	1.85558	1.83878	2.03699		0.884118
	1.64245	1.87523	1.77601		1.47695
	1.58565	2.50168	2.17943		0.73794
	1.03611	3.39477	2.84996		1.422
	1.96079	1.86435	1.92438		0.929007
	3.15773	2.34775	2.58513		1.33119
	1.61631	1.40353	2.02215		1.7167
	1.35022	1.85438	2.04631		1.58204
	0.530986	1.85875	2.8126		1.0524
	1.28927	2.34094	2.10134		1.31034
	1.83673	1.28637	3.57803		1.32906
	1.332	2.2113	1.54859		0.981002
	1.46274	1.72369	2.58311		1.12564
	2.16276	1.66268	2.61981		1.39858
	1.61055	2.84128	1.81539		1.52207
	2.5855	2.74646	1.53302		1.85678
	1.38081	1.72169	2.97698		1.68686
	1.87995	2.22462	2.6187		1.20041
	1.24599	2.39071	2.01755		1.05236
	1.95744	2.00125	3.32024		0.931042
	1.20295	1.74133	1.61355		1.6245
	1.06716	1.71254	2.82917		1.01229
	2.56942	3.17902	3.1875		1.3469
	1.67294	1.14433	2.12022		1.001
	1.73307	2.37682	1.39281		1.48162
	1.7321	2.03394	2.52258		1.71406
	1.89852	1.13949	2.02361		2.01864
	1.09441	3.38642	2.30659		1.37035
	1.36095	2.40755	1.36525		1.48871
	1.27438	1.95957	1.51223		1.48749
	1.29125	2.38783	1.98686		1.60613
	1.4128	2.51583	1.66244		1.19752
	1.15721	1.77728	2.15734		1.60725
	1.77956	1.48804	2.81706		1.01036
	1.82029	1.12844	2.6092		0.679061
	1.27086	1.97164	1.91881		1.77598
	1.47902	1.63872	1.41605		1.2006
	2.31602	1.31832	3.09661		1.40219
	2.39061	1.70745	2.68468		1.07517
	1.12003	1.52096	1.98826		0.59374
	1.91758	1.45772	2.68313		1.51445
	1.78828	1.13013	3.16156		1.25535
	1.21358	1.8181	2.19172		1.04715
	1.33204	1.26334	1.34928		1.19174
	1.47345	2.07432	1.42785		0.975079
	1.74409	1.69961	2.00069		1.19648
	1.40578	2.13251	2.84377		1.74153
	2.00208	1.48878	2.83904		1.01516
	2.49724	1.198	3.2772		1.6216
	1.00132	2.27993	2.3341		1.20238
	2.13339	2.06756	2.20034		0.904028
	1.27072	2.05073	1.64825		1.70545
	1.58071	1.28356	1.64963		1.55937
	1.81976	1.68474	1.98982		1.38918
	1.44164	1.76135	2.37385		1.0907
	1.40522	1.89113	2.57346		0.992303
	1.82651	1.73569	1.17191		1.39849
	1.32438	1.70617	1.89891		1.53166
	2.794	2.0646	3.19977		1.81047
	1.82428	2.93709	1.95847		1.34266
	2.2849	2.06912	1.39306		1.04567
	1.7904	2.84723	1.41116		0.849742
	1.69132	2.08757	2.00878		1.15106
	1.44118	1.37896	2.93		1.25926
	1.23914	2.16166	2.40271		1.67556
	0.986162	1.56499	1.64869		0.777827
	1.30722	2.54381	2.65316		1.02651
	1.37865	1.74398	1.83399		1.15997
	1.84606	2.28064	1.62735		1.3069
	2.0116	2.26862	1.92904		1.1315
	1.69088	1.34565	2.18577		1.71593
	1.18381	1.66722	1.52525		1.9323
	1.72983	1.63871	2.28228		0.789022
	1.84127	3.28569	2.15632		1.00747
	1.60774	1.62896	1.61326		0.958446
	3.16127	2.12371	1.96004		0.867844
	1.47397	1.51211	1.89373		1.26515
	1.40234	1.18882	2.46778		0.835772
	1.47981	1.70127	2.56153		0.812422
	1.7279	1.87203	2.46954		0.772271
	1.55073	2.1366	2.76008		0.972032
	1.83425	1.72808	1.85966		1.15739
	1.73391	1.91492	1.56593		1.03538
	1.75141	1.82231	2.04764		1.71783
	2.45507	2.01436	2.77291		0.619987
	1.31197	1.66088	1.58386		0.946325
	1.40088	1.61755	1.11338		0.897583
	1.28512	1.63834	1.81132		1.32394
	1.40668	2.0812	1.37673		1.32709
	1.56477	1.57867	2.32702		1.19282
	1.39735	1.19427	1.56233		0.895228
	2.1028	1.6536	0.991152		1.19945
	1.98474	2.39244	2.30468		1.32146
	1.53624	1.13472	2.4276		1.49779
	1.64377	3.04183	2.07642		1.38647
	1.33061	2.0283	2.2759		1.45086
	1.98022	2.40608	2.11861		1.27753
	1.34335	1.32676	4.05706		0.911325
	1.47833	1.92828	1.54353		1.14121
	1.32953	2.25938	1.75288		1.19485
	1.24859	2.05014	1.45534		1.33315
	1.7181	2.04183	2.11735		1.15854
	1.50351	2.80012	1.75146		0.902686
	1.01075	1.45556	2.30456		1.38185
	1.6142	1.6003	1.94023		1.20997
	1.44946	2.18886	1.58518		1.25364
	0.918725	1.6845	3.82669		1.29144
	1.39174	1.62723	2.59388		1.51383
	1.92611	1.38532	2.89415		1.11521
	1.68812	1.72094	2.04517		1.41026
	1.96055	1.68189	2.37873		1.31807
	1.33718	2.02824	1.62798		1.18302
	1.34773	2.24132	2.42041		1.4883
	2.10501	1.65545	2.38546		1.3838
	1.54927	1.59889	2.36009		1.2244
	1.48288	1.55777	2.54482		0.962411
	1.56805	1.70566	1.65004		0.974254
	2.16572	1.46409	1.34989		0.773079
	1.369	1.64098	1.44724		1.22166
	1.30775	1.62029	2.25559		1.08221
	1.15243	1.76257	2.61906		0.939821
	2.00278	1.35546	1.54956		1.34504
	1.30403	3.09557	1.92321		1.06931
	1.55081	2.35343	1.87379		1.42875
	1.77912	2.07271	2.19612		1.645
	1.44424	2.61512	2.5143		1.36841
	1.55734	3.49478	2.40825		1.31521
	2.22317	1.29144	2.33961		1.43267
	2.28187	2.58417	2.47188		1.75897
	1.41169	2.58586	1.7738		1.35029
	2.01357	4.0255	2.02666		1.15576
	2.20731	2.2187	2.43243		0.709452
	2.04301	2.23165	2.89134		1.10368
	1.00749	1.52278	2.59529		2.36133
	1.03829	2.05392	3.21679		1.1463
	1.16149	1.39147	1.59068		2.74795
	1.22649	1.43437	1.92356		0.89915
	1.95628	1.51346	1.87735		1.15504
	1.4463	1.55629	2.31927		1.0779
	1.80331	1.34633	1.61421		3.20687
	1.34061	1.42345	2.70742		0.977943
	2.29255	1.47778	3.26408		1.45126
	1.35495	2.03844	0.706701		1.3627
	2.10241	2.02738	2.21498		1.52776
	1.16346	0.901107	2.47615		1.75809
	1.41341	2.72213	2.74969		1.41106
	2.43678	1.88744	1.97407		1.3029
	1.30127	2.09033	2.90429		1.18647
	1.21766	4.30368	2.26786		1.59224
	1.56049	2.02161	2.20986		1.18802
	1.54324	1.77097	1.47318		0.837581
	1.02189	1.77307	1.82754		1.54312
	1.31201	2.32649	2.83125		0.847751
	1.39972	2.77554	1.86919		1.90714
	1.21523	2.53526	3.81091		1.35513
	1.74956	2.09396	2.1955		1.62066
	1.64278	1.49802	3.11989		0.8568
	1.55734	2.26085	1.65168		0.89915
	1.32553	2.25355	2.16785		1.24409
	1.21213	2.18764	1.43259		2.38673
	1.46785	1.80459	2.02281		2.07389
	1.92198	1.66483	2.5561		1.0357
	1.04864	1.37013	1.7498		1.05621
	2.28778	1.28824	2.94923		1.83704
	0.920624	1.88955	1.60289		1.18872
	2.27532	1.97985	2.6654		1.63015
	1.52356	1.65019	2.98978		1.64969
	1.3693	1.46488	1.90124		1.35322
	2.27517	1.59722	1.18835		1.71972
	1.30569	0.965067	2.77762		1.38802
	2.66127	1.63311	2.06627		1.1244
	1.87682	1.20756	2.10757		1.66329
	1.11533	1.46669	2.34395		1.40268
	1.48204	1.53745	2.33829		1.34205
	1.86718	1.3585	1.53306		2.29118
	2.5787	1.79156	1.78519		1.95323
	1.55393	1.81478	2.4754		1.55585
	1.1291	1.45719	2.05705		0.850333
	2.11214	1.55082	1.49832		1.66736
	1.36224	2.17223	2.39848		1.62671
	1.78642	1.37592	1.38124		1.27171
	1.66744	1.96793	2.78794		1.22041
	1.27574	1.69455	1.93994		1.05483
	1.41529	1.77238	1.73134		0.665863
	1.78199	2.08346	2.28584		0.770635
	2.27336	1.5552	1.90114		1.30179
	1.09155	1.26361	2.03608		1.46926
	1.39403	2.06872	2.60416		1.31523
	1.20043	2.07142	2.32129		0.805549
	0.987623	2.55789	2.14698		1.36796
	1.20653	2.29774	1.63673		1.41995
	1.07334	0.952666	1.94528		0.872592
	1.96962	1.08862	1.7929		1.1501
	1.21448	1.49443	0.882364		1.18721
	1.25978	1.8048	2.55136		1.49621
	1.73103	1.42845	2.59611		1.05056
	2.34981	1.51237	1.89418		1.17762
	1.47383	1.9776	1.44535		0.925496
	1.60605	2.22839	1.47444		1.64694
	0.870554	2.28289	2.30771		1.26627
	2.46102	0.92136	3.02225		1.41888
	1.26208	1.87611	1.87742		1.10204
	1.72831	1.54966	2.07336		0.969292
	2.08682	2.92339	1.56949		1.27938
	1.17282	2.22332	1.87032		1.30225
	1.5227	1.91795	1.74504		1.67034
	1.82917	2.36687	1.82099		0.930103
	1.37153	1.83683	2.61235		1.60806
	1.31451	2.13155	1.1354		2.23546
	1.23221	1.72976	2.09843		1.73145
	1.33076	1.6237	2.39313		1.12762
	0.977251	1.53107	2.31595		1.14618
	1.93694	1.54547	2.78606		1.62552
	0.979783	1.85457	1.77875		1.21825
	1.20386	1.79498	2.09978		1.9612
	1.81601	1.438	2.77991		1.9575
	1.65465	1.6818	2.14624		0.761325
	1.49654	1.97802	1.03924		1.07687
	2.46968	1.66337	2.23864		1.13609
	1.16093	1.90278	3.24618		0.95567
	2.01499	1.54299	1.78104		1.45323
	1.16732	2.15271	1.75643		1.39882
	1.351	1.32408	2.24481		1.34773
	1.94728	1.32763	2.95609		1.77649
	1.83244	2.40154	1.65279		1.52178
	1.42598	1.39643	2.17247		1.88576
	1.45889	1.91845	2.441		1.05405
	1.78842	1.95356	1.23907		2.6397
	0.937773	1.48732	1.82323		0.92224
	1.10528	2.53566	2.78911		0.950654
	1.61945	1.5541	2.62473		1.35791
	1.32944	2.15201	1.46772		0.895627
	1.80029	2.17951	1.47937		1.65659
	1.7117	1.25998	1.87688		1.62316
	1.90783	2.72851	2.07294		1.79931
	1.09278	2.16873	3.06151		1.38105
	1.34613	1.68618	1.39445		1.13874
	1.27163	2.01427	2.29682		0.751132
	1.55737	2.14572	2.3827		0.65918
	1.39852	2.24721	2.32869		0.838948
	1.23109	1.78977	2.54773		0.954463
	1.97997	1.62126	2.86949		0.793774
	1.90716	2.08486	1.72547		1.04051
	1.92221	1.41552	2.7906		0.913599
	3.18513	1.47964	1.79327		0.875016
	1.716	1.94827	1.71584		0.833919
	1.19641	1.71473	1.63637		1.53749
	1.24804	1.02534	2.8205		0.806646
	1.8793	1.70872	2.83101		0.799491
	1.65434	1.83379	2.00813		1.42942
	2.52568	1.66359	1.17456		1.55094
	1.14086	1.43529	2.72773		1.78908
	1.26066	1.41759	1.71459		1.6966
	1.92169	1.82518	2.23273		1.38106
	1.01844	1.60647	3.1465		1.85708
	2.03641	2.11646	1.18019		1.0088
	1.04715	1.8687	1.75861		1.13005
	2.22298	1.51343	2.09199		1.11335
	1.85661	2.26828	1.7333		1.9538
	1.42801	1.99027	1.76194		1.31142
	1.28481	1.38078	2.22118		1.34434
	1.26879	2.09648	1.87252		1.91304
	1.80879	2.34488	2.23439		1.2299
	1.34141	1.79242	2.2859		1.12463
	1.55125	1.46625	2.54941		1.55189
	1.81038	1.14793	2.33331		2.20238
	2.7933	2.45056	2.08141		0.981247
	1.39794	1.43401	2.61854		1.29481
	1.43415	1.7889	2.66736		0.75352
	1.72091	1.40037	1.69799		1.68907
	1.64326	1.85788	3.21054		1.13092
	1.62387	2.00081	2.16978		2.06158
	1.435	2.23551	2.154		1.87723
	1.23916	3.49092	1.79638		0.979424
	1.20834	3.15505	1.80981		0.642759
	1.12598	1.79699	2.26809		1.3127
	2.57634	1.49808	2.40102		1.0562
	1.57965	1.4373	2.42624		1.19883
	2.58297	1.16022	2.38803		0.826074
	2.40606	2.15477	1.63753		1.51364
	0.913599	1.64307	1.91928		2.60728
	1.21882	1.39816	1.78156		1.27848
	0.995112	1.77852	1.79276		1.45875
	2.36355	1.06852	2.07301		1.02567
	1.99178	1.23503	1.87359		2.76864
	1.60664	2.44433	2.41595		1.62336
	0.935361	1.79606	1.79791		1.11303
	3.03333	2.16812	2.8016		1.37592
	2.83004	2.0438	1.66729		1.16816
	2.04775	1.0278	1.95597		1.46853
	2.51858	1.35607	2.86474		1.98594
	1.76387	1.71029	1.76342		0.778285
	2.05675	1.48223	1.54856		1.42225
	1.80916	1.57959	1.64302		1.51032
	1.67366	2.47445	2.37405		0.874538
	2.09537	2.15378	2.26049		1.82138
	1.38491	1.38869	2.24801		0.980333
	1.36891	1.71655	3.56707		0.604408
	0.769573	1.751	2.33811		1.22763
	0.986956	1.96624	1.84889		1.42427
	1.48829	1.79274	0.919477		0.963015
	1.7445	1.19593	1.86335		1.31789
	2.5555	1.14996	2.90582		1.60206
	2.63242	1.11314	3.01899		0.82226
	1.10461	2.27892	1.69548		1.47369
	1.45818	1.20508	1.80997		2.89164
	0.802414	2.38266	3.72967		0.790491
		1.33116	1.54653		0.948978
		2.16737	2.85585		2.64824
		1.58539	2.75024		1.0548
		1.45765	1.69057		1.51502
		2.18934	2.4756		1.52367
		1.50647	1.69383		1.16338
		1.54542	3.01391		1.02091
		1.36827	2.72455		0.359056
		2.12169	1.78623		1.22334
		1.41941	2.07377		1.45104
		1.89031	2.06355		0.742348
		1.55796	2.13289		1.617
		2.00174	2.26258		1.12994
		1.17841	1.54966		1.19584
		1.52077	1.41383		1.98348
		1.26521	1.79989		1.16446
		1.72525	1.92524		1.45178
		1.46035	1.76763		1.46017
		1.89411	1.30808		1.51859
		1.98293	1.57716		0.966834
		1.82824	1.21748		1.61338
		3.07857	2.69923		2.41049
		1.52795	2.36208		1.63253
		1.45504	1.93659		0.911098
		2.28176	2.06967		1.28395
		1.35157	1.12576		1.2501
		1.95465	2.14109		1.53591
		1.32646	1.7607		1.51488
		1.31081	2.54238		1.1191
		0.875459	2.20409		0.953968
		1.61434	2.34583		1.25924
		2.16753	1.18548		0.920568
		1.80285	1.62497		1.48184
		1.08229	2.27037		1.33478
		1.5297	1.6767		1.36091
		1.76161	2.04041		1.58261
		1.85366	1.51247		0.983626
		2.07954	2.26		1.1105
		1.46317	3.57451		1.61692
		1.433	1.50678		1.11319
		1.97915	1.66148		1.25943
		1.37267	1.98655		1.46583
		1.51555	1.41882		1.00623
		2.17807	2.16848		1.32939
		1.01268	1.83761		0.965773
		1.53112	2.74934		1.87675
		1.20575	2.86269		1.29221
		1.60147	1.91575		1.15982
		1.3952	2.12679		1.26953
		1.96409	2.08689		1.17786
		1.61776	2.45657		1.75261
		1.277	2.57045		1.06549
		2.08829	3.03947		1.0482
		1.44908	2.39727		1.75107
		1.54337	2.59202		1.00513
		1.56431	2.45139		1.47926
		0.84003	3.53041		0.820651
		1.817	2.70727		0.645614
		1.51985	2.62082		0.910011
		1.11191	2.74879		0.729204
		1.49765	1.84425		1.39463
		2.14994	1.99728		1.76055
		1.41148	2.50959		1.59804
		2.10555	2.30681		1.68592
		1.76907	1.50607		0.858128
		1.58528	1.98093		1.28362
		0.941952	2.14036		1.34289
		2.47769	2.10351		1.38607
		1.31107	1.67696		1.18914
		2.1353	2.39383		2.16773
		0.874921	2.14386		1.99035
		2.51988	2.67955		1.14067
		1.25116	2.14911		1.52493
		2.88465	2.3318		1.34759
		1.53042	1.25548		2.17535
		0.906413	2.77665		0.865701
		3.562	2.10832		1.18584
		2.36485	2.08993		1.36054
		1.19737	2.00925		1.34259
		1.78562	2.0623		1.79987
		2.01283	2.17264		1.25841
		2.29569	2.28764		1.079
		1.4255	2.89924		1.27498
		1.49464	2.56209		1.22362
		2.28364	2.72614		1.54967
		1.32437	3.0651		1.49618
		1.39902	1.28522		1.03924
		1.58468	4.008		1.61656
		1.79114	1.57421		1.53959
		1.18461	1.46321		1.67471
		1.58873	2.03343		1.71239
		1.63057	2.33469		1.87416
		1.55036	2.00639		1.34871
		2.14974	1.14982		0.489271
		1.4904	4.06108		0.582333
		1.54378	1.99657		1.00036
		1.63532	2.91518		1.50343
		2.42881	2.28105		0.934465
		1.83452	1.39612		1.29411
		2.13481	2.79548		0.881216
		1.62013	2.93113		1.09675
		1.62757	1.81068		1.05985
		1.32613	1.39694		1.40906
		1.5716	2.07144		0.712939
		2.06861	1.68833		1.31636
		1.74894	1.8274		0.954452
		2.24591	2.03882		1.29328
		2.40891	2.25017		1.2859
		1.3772	1.79022		1.16576
		1.2813	2.22519		1.42812
		1.17269	2.71734		1.34134
		1.00506	2.10195		1.67756
		1.83293	2.87437		1.02493
		1.76491	2.09508		0.795684
		1.42391	3.35908		1.77288
		1.17696	2.8116		1.21951
		1.35822	1.40117		2.35397
		2.01901	2.54289		1.5902
		2.61111	2.56235		0.955174
		2.11745	1.7564		0.890936
		1.88748	1.51495		1.39725
		1.60266	1.49912		1.05375
		1.61523	1.75435		1.05778
		1.42527	1.75911		1.19992
		1.74299	2.02221		1.46124
		2.07481	2.06676		1.26609
		1.57679	1.31221		1.67174
		2.0848	1.23211		1.42115
		1.71072	1.70975		0.562535
		2.06202	2.63628		0.944406
		2.06477	2.21746		0.664546
		1.72049	1.42644		1.20929
		1.52636	1.85954		0.99644
		1.88344	2.25358		0.926736
		1.83945	2.50452		0.934726
		1.86787	1.40453		1.10622
		1.85702	2.97065		1.09725
		2.16318	1.48114		1.05358
		1.98634	2.63239		1.08129
		2.29255	0.907787		1.24583
		1.37494	1.55011		1.58618
		1.9124	1.80736		1.77382
		1.52768	1.51041		1.55792
		2.30215	2.15295		0.608945
		1.2937	2.00125
		2.28667	2.05461
		1.32438	1.87352
		0.61964	2.24566
		2.824	1.21489
		2.70919	1.84188
		1.28433	2.28679
		1.27589	2.65334
		1.4592	1.73655
		1.91913	2.06106
		1.94881	1.5245
		1.05329	1.64993
		1.92516	1.98091
		1.43276	2.16813
		2.20607	1.96587
		1.38437	1.73558
		0.765736	1.06445
		1.65787	1.85244
		1.38572	1.77463
		1.76851	1.66766
		1.8896	2.97212
		1.52311	1.59522
		1.45669	1.8797
		1.98944	2.99543
		2.13813	2.60646
		1.17095	2.43677
		1.88632	1.86045
		1.91932	1.63806
		1.76892	2.0007
		1.88304	0.930751
		0.665748	1.0279
		2.15397	1.4766
		1.13795	2.32871
		1.71934	2.71668
		1.09282	2.28399
		1.55358	1.99035
		1.41731	2.44106
		1.53895	1.96247
		1.89744	1.37273
		1.49354	1.9245
		1.88432	1.12888
		1.53831	1.96319
		1.67127	2.18127
		1.41111	2.02815
		1.57964	1.60603
		1.92789	1.99304
		2.10652	2.21622
		1.31612	3.30066
		2.47687	1.41328
		1.10897	1.80562
		2.04644	1.64572
		1.52845	1.66406
		1.38699	1.69991
		2.14643	1.95882
		1.37844	2.66647
		2.34002	2.4923
		1.19171	3.71837
		2.59497	2.5641
		1.2829	1.54665
		1.59528	1.77969
		2.42909	2.52879
		1.36862	1.96036
		1.97139	0.846973
		1.51106	2.75433
		1.36577	1.80938
		1.05899	2.89491
		1.68564	1.73867
		1.93321	1.93214
		2.78246	1.91473
		1.64586	1.2704
		1.78231	2.21401
		2.18293	2.04274
		1.75626	2.60822
		2.04054	2.48306
		1.8261	2.22976
		2.11711	1.88467
		2.00918	1.69478
		1.45291	2.42803
		1.08121	1.87948
		0.884232	1.59075
		1.67766	2.59285
		1.82218	2.55584
		3.00635	1.74501
		2.03684	1.73893
		2.40172	2.52527
		2.50796	2.44938
		1.87204	1.9382
		1.93034	1.56116
		2.20349	2.10939
		1.93325	2.23642
		1.69632	1.50368
		2.10634	1.07156
		1.52739	2.25155
		3.03732	2.09387
		0.675948	2.29626
		2.33638	2.76637
		1.32062	2.45042
		1.87129	2.43333
		1.32299	3.65386
		1.66213	0.86014
		1.24893	1.8507
		1.52058	1.98396
		1.72093	2.51875
		1.56172	2.15949
		1.71094	2.0679
		0.922601	1.78498
		1.7035	3.00986
		2.43492	1.92445
		1.78897	2.37021
		3.13219	2.61338
		2.35606	2.42713
		2.50522	3.33431
		1.63757	2.29867
		2.04701	1.70952
		1.43064	3.05665
		1.47944	2.93886
		1.12677	1.58662
		1.81872	1.77671
		1.68609	0.825918
		0.869812	2.10748
		2.51628	2.34719
		1.97125	1.86619
		1.89125	1.8632
		1.94839	2.40429
		1.32909	2.07094
		3.01221	1.73029
		1.6104	1.82996
		1.73791	2.24631
		1.72223	2.23388
		1.73531	1.54724
		1.58965	2.71517
		0.936284	3.42397
		1.28418	2.46584
		2.13864	3.20409
		1.8822	1.7982
		2.07484	2.00543
		3.34275	2.64784
		1.61029	2.38167
		2.14459	2.66833
		0.536712	2.18895
		1.82689	2.51422
		1.3826	2.1805
		1.18835	2.1812
		2.26553	2.2011
		1.44268	1.59077
		1.36787	2.38866
		0.928817	2.26403
		1.59875	1.81881
		2.10607	1.3558
		2.47769	2.20053
		1.33494	2.25443
		2.58104	1.84017
		0.857113	2.26821
		0.683609	2.44703
		1.44847	2.34405
		1.82732	1.72158
		2.67013	2.55328
		2.30422	2.01378
		1.76347	2.81631
		1.30781	2.05861
		2.10398	2.10801
		1.34669	2.54282
		2.13272	2.11246
		1.84759	1.98325
		1.1193	2.14929
		1.96977	1.83045
		0.769573	3.53924
		1.94262	2.0238
		2.04082	1.64066
		1.76231	3.06181
		2.17853	2.9767
		1.25034	2.94247
		1.97209	3.19276
		1.75116	2.01012
		1.28967	3.12585
		2.12637	3.67053
		1.35845	2.24282
		1.49903	2.48778
		2.10052	2.45291
		1.86338	1.82932
		2.95936	2.51978
		2.73026	1.28662
		2.02536	3.10351
		1.15344	1.92834
		1.5549	2.3184
		1.93773	3.31008
		1.44813	2.49368
		1.23604	2.59528
		2.38152	3.21726
		1.32111	4.20999
		1.29072	1.79564
		2.09237	2.44423
		1.85116	1.79473
		2.08601	2.14442
		2.51716	3.03059
		2.15243	2.65724
		2.1032	1.97186
		1.40235	2.84675
		1.72084	2.56989
		2.19395	2.34871
		1.36478	1.57751
		1.99427	3.07981
		2.2371	2.09316
		1.8435	1.57909
		2.02898	1.81873
		2.82901	1.5661
		1.70971	3.2031
		1.74635	2.69697
		1.43459	3.17999
		2.03776	1.28461
		1.83506	2.41841
		1.81696	3.0575
		1.38215	3.2071
		1.83276	2.58738
		1.91032	2.19976
		2.17879	2.1939
		2.92957	2.92098
		1.4227	1.69625
		1.46819	3.93719
		1.55337	3.3908
		1.22434	2.34394
		1.93198	2.26618
		1.14962	2.96192
		1.86582	1.6721
		1.26341	2.31459
		2.04963	1.67631
		2.18169	2.36362
		2.06258	1.55867
		2.11818	2.65637
		1.7548	2.08532
		1.20552	2.26684
		2.23889	1.78621
		1.73331	1.99656
		1.76941	2.89069
		1.3527	1.76339
		1.35827	2.078
		1.81151	1.98914
		1.29696	1.30231
		1.81587	2.5379
		1.88771	2.2697
		1.57358	2.34779
		2.44114	2.91875
		1.6691	0.8584
		1.78789	2.57665
		1.58963	1.46996
		1.70959	2.7653
		2.77521	4.05316
		1.7885	2.9856
		1.40506	2.27906
		1.92421	2.0552
		2.16978	1.0566
		1.45024	2.39452
		1.23386	1.18838
		2.5588	2.29039
		2.06268	2.09572
		1.9352	1.91336
		2.07884	1.78301
		1.13159	1.62298
		1.59468	2.0203
		0.962264	2.7073
		1.42157	2.59605
		1.84625	1.99779
		1.01821	2.19197
		1.2318	1.31627
		1.44329	3.12421
		1.61474	3.05849
		1.66065	2.72791
		1.75118	3.28228
		1.4442	1.23102
		2.07625	2.85908
		2.59869	2.17298
		1.97564	1.91254
		1.82879	2.53043
		3.03729	4.52109
		2.274	2.36485
		1.65921	2.49635
		1.5684	2.1694
		2.46945	3.49256
		1.60105	1.65633
		1.96705	2.68846
		1.34524	2.46145
		1.43176	2.95367
		1.51988	2.13505
		1.13144	2.74648
		1.69174	3.28542
		1.89455	3.53691
		1.84282	2.9062
		2.26517	2.19748
		1.53046	3.52072
		2.06166	2.70679
		1.56563	2.38589
		1.71548	1.89752
		2.3237	0.992353
		2.40279	2.69007
		1.60143	2.6665
		2.14393	3.01672
		1.40858	2.1633
		1.10054	1.94517
		2.27214	2.94159
		2.81182	2.12462
		2.07562	2.10139
		1.52245	1.75429
		2.14602	2.76806
		1.31519	1.84895
		1.55585	2.06947
		1.40764	2.46815
		1.22038	2.48453
		1.08814	2.37324
		2.08171	3.21433
		1.09576	2.68263
		2.15648	1.87229
		1.51881	2.75884
		1.28844	1.1228
		1.44431	1.72479
		1.40168	2.32703
		1.59674	1.92393
		2.38291	2.36408
		1.48479	2.04266
		3.42869	1.90494
		1.92975	2.67767
		1.7039	2.19625
		1.68194	1.86906
		1.59672	2.40318
		1.81491	4.33302
		1.7458	2.35718
		2.23822	1.93783
		1.50968	2.29198
		0.73628	2.61852
		1.33796	2.29068
		1.46893	1.87639
		1.53115	1.87509
		1.50264	2.07135
		2.80777	3.47133
		2.37807	2.76215
		1.76095	2.76345
		1.60138	3.03861
		1.86355	1.45509
		2.06029	1.49404
		2.00739	2.48957
		1.98111	3.52509
		1.5177	3.48069
		2.09954	1.87565
		2.87282	2.62684
		2.31523	2.47259
		1.42959	2.51157
		2.14285	2.24957
		1.34424	3.31213
		2.59866	3.04687
		1.98459	2.50642
		1.47964	2.17654
		2.03729	3.72132
		1.41934	2.34057
		2.20205	3.04508
		2.30403	3.22489
		2.4208	2.53779
		2.29053	2.45262
		2.56074	1.89373
		1.64553	2.77399
		2.06288	2.59383
		1.95558	3.24157
		1.83766	0.851171
		1.68235	2.43915
		2.23184	3.04071
		2.65384	3.21323
		2.07188	1.76719
		2.63734	1.78368
		1.53154	2.96122
			2.8918
			3.37555
			1.93899
			1.95982
			1.9262
			2.78691
			3.37173
			3.17961
			2.76606
			1.63322
			2.36924
			2.48484
			2.03271
			1.73572
			1.66864
			1.96299
			2.5918
			2.23749
			2.15738
			0.986817
			3.62023
			1.79558
			2.73153
			1.77002
			2.64916
			2.21629
			1.36064
			1.99172
			1.21807
			0.769573
			3.53708
			2.41457
			2.37443
			2.20335
			2.82165
			2.30291
			2.79954
			1.85954
			2.2345
			2.52778
			3.30714
			2.92007
			2.72443
			3.25605
			2.99657
			1.08068
			2.36155
			3.13346
			2.714
			1.84838
			0.788333
			2.91859
			1.44786
			2.57639
			2.94175
			1.65116
			2.24367
			2.37448
			3.80605
			1.43762
			2.27384
			1.55776
			2.47021
			1.9306
			1.18896
			2.14253
			2.78717
			1.73305
			3.0004
			1.71186
			1.8115
			3.63655
			2.27187
			2.51686
			1.80005
			2.78477
			1.91179
			1.77018
			3.31255
			1.39871
			1.64484
			2.23393
			2.32034
			0.744741
			2.63106
			2.08032
			1.76133
			2.57417
			2.56073
			2.54195
			2.55348
			2.59555
			2.92759
			2.8649
			2.70193
			2.3976
			1.90065
			2.28502
			3.48328
			1.66915
			2.68514
			3.47802
			2.53063
			1.95822
			2.38934
			2.56428
			2.09974
			2.69106
			0.974348
			2.70398
			2.80449
			2.80678
			2.29781
			3.01987
			2.47487
			3.05563
			1.50327
			2.23319
			2.2664
			0.57506
			3.22217
			1.93182
			2.5739
			3.08472
			2.31059
			2.72816
			1.66028
			2.16782
			2.34136
			2.28057
			1.20209
			2.63543
			2.78971
			2.23623
			2.71245
			2.65551
			2.07433
			3.33495
			2.79521
			2.03264
			2.697
			2.06259
			1.92221
			1.11801
			2.20382
			3.48535
			1.91714
			3.93901
			1.68306
			2.33096
			3.02713
			1.405
			2.64034
			2.95162
			2.45423
			2.62092
			2.30812
			2.01024
			2.57439
			2.39711
			3.28136
			2.46521
			2.71668
			2.13902
			1.62335
			1.85559
			2.58447
			2.04416
			2.39415
			2.46901
			2.91665
			2.59118
			2.50124
			2.16384
			3.14438
			2.34424
			2.81539
			3.20485
			2.19832
			2.79343
			2.61606
			2.19806
			3.02464
			2.68225
			2.19904
			3.4592
			2.5101
			1.81608
			2.86616
			1.69781
			2.50315
			2.50725
			2.61256
			2.34754
			2.5295
			2.07697
			1.90565
			2.06901
			2.64827
			3.20585
			2.44692
			2.39205
			1.80398
			1.72882
			1.8775
			2.99971
			2.84728
			3.15457
			2.78244
			2.28874
			2.27926
			2.37698
			2.47089
			2.27707
			2.10287
			1.45649
			2.19017
			3.38526
			2.50782
			1.10584
			2.67228
			2.06972
			1.13086
			1.78707
			2.43177
			1.87787
			4.02601
			1.95599
			1.91874
			2.15135
			2.71888
			1.83034
			2.853
			2.06898
			3.403
			1.53654
			2.28191
			2.38303
			2.27288
			2.55359
			2.4838
			2.99756
			1.68451
			2.62553
			1.97647
			2.85781
			1.81798
			4.32301
			3.9535
			2.41092
			2.52654
			2.6664
			1.80743
			3.16529
			2.34726
			1.73737
			2.3236
			2.33068
			1.88724
			1.94586
			3.27779
			1.88071
			2.41849
			2.81851
			2.60956
			1.65417
			2.21381
			2.58627
			1.86518
			2.74521
			1.9091
			1.92968
			2.79965
			3.15226
			2.52852
			2.53946
			2.10486
			2.08778
			3.24065
			1.79561
			2.35397
			3.55835
			2.06496
			2.36159
			1.26035
			2.7417
			1.5071
			2.60393
			1.89295
			1.5019
			2.51129
			1.83849
			1.71056
			2.4933
			2.18949
			1.52744
			2.04001
			3.64097
			2.05591
			2.24126
			2.43028
			1.7873
			2.19301
			2.00713
			1.71164
			2.22018
			1.23166
			2.77279
			3.49261
			5.28283
			2.47685
			2.34686
			2.38162
			2.93498
			3.52791
			2.63029
			2.01464
			0.827982
			2.17478
			2.18185
			1.68865
			0.843101
			1.27576
			1.89779
			1.38257
			1.57431
			1.02814
			1.26064
			2.25663
			2.84097
			3.21477
			2.51541
			2.78979
			2.52649
			0.618375
			1.76477
			1.9271
			2.10906
			3.0333
			2.06737
			1.35309
			2.61946
			3.89256
			3.1302
			2.36833
			1.98923
			2.25202
			2.25357
			1.09624
			1.97836
			1.61536
			1.93727
			2.67139
			2.35521
			2.01226
			1.90074
			3.01406
			3.0839
			1.75986
			3.13883
			1.59021
			1.93601
			2.47466
			3.05379
			0.906077
			2.91844
			1.57064
			2.14195
			1.50001
			1.71958
			1.45838
			2.00783
			2.11382
			1.56656
			1.35547
			1.87506
			2.28962
			2.06265
			2.20035
			2.08303
			2.40149
			2.00384
			1.7994
			2.33775
			2.18302
			1.26803
			1.67685
			2.146
			1.69943
			2.26378
			2.29758
			1.69581
			2.24663
			1.91546
			1.88842
			2.59509
			2.23169
			2.07317
			1.86098
			2.0087
			1.54184
			1.75996
			2.3533
			1.70386
			2.30622
			1.82515
			2.02541
			2.37889
			2.01988
			2.49833
			2.11722
			1.977
			2.50662
			1.6168
			1.64489
			3.1678
			2.02756
			2.35107
			1.57843
			1.30351
			1.96026
			1.76864
			1.0839
			2.2722
			3.1016
			2.3168
			2.53303
			1.34399
			1.40893
			2.58049
			1.89682
			2.09951
			1.46054
			2.02153
			1.05674
			2.48783
			2.74602
			1.67257
			2.46192
			1.61735
			1.319
			2.35697
			2.66731
			0.96083
			2.80692
			2.09892
			2.34966
			1.86068
			1.8804
			2.47377
			2.75317
			2.78464
			2.83502
			3.7779
			1.61128
			1.73401
			1.68964
			2.32123
			2.19307
			2.30281
			1.69632
			1.68435
			2.62524
			1.63099
			1.50218
			1.44831
			1.3867
			2.3561
			1.96983
			1.24138
			2.30626
			1.9347
			2.48845
			1.65979
			2.79675
			2.22254
			2.02596
			2.21522
			1.97417
			2.68401
			2.60789
			2.24812
			1.87639
			2.52494
			2.24064
			0.910462
			1.49028
			1.99263
			1.63907
			2.26149
			2.54555
			2.66188
			1.19845
			1.57518
			2.54249
			2.06278
			1.98709
			1.95455
			1.57679
			1.16658
			2.00372
			1.09639
			1.54022
			1.99797
			1.44911
			0.998092
			2.74598
			2.43175
			1.95407
			2.14856
			2.39006
			2.49255
			1.63331
			2.20786
			2.98453
			2.60762
			2.23361
			1.96654
			2.61763
			2.0983
			1.77307
			2.00573
			2.27234
			1.94474
			1.46744
			2.52788
			1.54847
			1.26315
			1.40628
			1.97092
			2.87326
			2.00798
			2.12038
			2.5761
			1.85421
			1.63187
			0.871639
			1.16716
			1.27535
			2.24016
			2.27501
			1.7815
			1.58334
			2.71448
			1.23679
			1.78744
			1.56856
			1.96057
			2.13252
			1.41637
			1.73842
			2.20005
			1.68805
			1.53859
			1.61642
			1.2673
			1.1678
			2.10041
			2.62309
			1.92402
			1.9869
			1.78235
			1.50919
			1.59245
			1.00637
			1.73355
			2.69859
			2.09383
			2.02615
			1.42725
			3.29208
			1.58808
			1.92385
			1.76017
			1.41749
			1.94413
			1.50331
			2.07125
			1.39479
			1.97375
			1.93357
			1.57532
			2.10338
			2.08655
			1.25464
			1.44072
			1.44788
			2.30479
			1.71133
			2.16204
			1.77089
			1.82869
			2.27684
			1.48966
			1.86142
			1.71667
			3.03275
			2.04469
			1.72331
			1.55455
			2.41899
			1.9254
			1.72468
			2.44463
			3.13085
			1.76389
			2.22454
			1.68858
			1.58738
			2.07395
			1.69309
			2.45362
			1.92753
			1.67168
			2.57545
			1.47797
			1.58149
			2.91276
			1.88087
			1.83485
			2.97753
			1.15736
			1.70195
			2.15782
			1.55305
			1.38698
			1.44066
			2.17507
			2.36076
			1.77235
			1.65138
			2.25208
			2.01176
			1.64919
			1.95942
			1.97867
			1.88805
			1.98315
			2.16821
			2.2408
			2.39121
			1.77222
			2.19593
			1.71141
			2.45162
			1.67552
			1.37754
			3.4701
			1.63921
			1.21823
			1.64125
			1.99952
			1.18666
			1.58075
			2.02375
			2.84582
			1.01698
			2.0586
			1.87781
			2.70479
			1.60315
			3.09005
			2.08775
			3.23019
			2.0735
			2.70358
[truncated: 100 more rows]

## Sheet: Fig. sup. 4C
30 min cell volume - phase 3
	Control	PA(11)	VAN(20)	PA + VAN(10)	PA + VAN(20)
	2.19397	1.24068	1.34496	1.95952	1.19852
	1.89106	2.20817	1.47045	2.7414	1.18681
	1.96378	1.16732	1.75856	1.19535	1.62361
	3.72364	2.07254	1.70754	0.921615	1.4891
	1.92206	1.14425	0.983909	1.21463	1.91529
	1.56056	1.43268	1.53519	1.11035	1.42275
	1.9407	2.35149	1.49961	1.72332	1.932
	2.1232	2.29632	1.03503	1.50467	1.21311
	1.91013	0.943659	3.19224	1.45964	2.58077
	2.43529	1.26656	1.05731	0.70045	1.15525
	1.56878	2.07498	1.89374	1.82704	1.41141
	2.20363	1.80426	1.86596	2.04303	1.70595
	2.14253	1.44409	1.10896	1.51133	1.59001
	2.99573	2.25748	1.2097	1.50499	1.64644
	2.01524	1.75589	1.87614	3.49007	1.66573
	2.02604	2.0308	1.50266	2.30931	2.44166
	1.4588	1.23489	1.05242	0.741855	1.62437
	2.00064	1.92011	2.27227	1.82621	2.70077
	1.91678	1.68903	1.40305	1.75103	1.53541
	1.63286	1.61096	0.794066	2.12188	2.46572
	3.44347	1.81963	1.30874	1.6957	2.03322
	2.12561	1.62877	0.997243	2.90414	1.98634
	3.11144	2.6666	1.33702	1.79864	0.944247
	1.73473	1.91383	2.36205	2.13608	1.17907
	2.16546	1.50089	1.64207	1.66087	1.64762
	1.94163	1.52391	2.2176	1.37268	1.76438
	2.38034	2.38419	2.00842	2.59597	0.773079
	1.0701	2.53107	1.57247	1.15085	2.14037
	2.08003	1.79528	1.40674	1.38032	2.19674
	2.17946	1.95605	1.14425	1.43785	1.17925
	1.50608	1.71452	0.933174	1.69969	1.32176
	1.87759	1.44572	1.2298	1.24816	1.24553
	1.51791	2.22166	2.22258	1.51338	1.01013
	2.06051	1.97064	1.49479	1.36969	1.68122
	2.83836	2.19142	1.327	1.60524	1.46575
	2.85971	1.96287	1.92961	1.82103	1.63175
	3.14327	1.76224	2.06157	1.2387	1.23539
	1.95488	1.72143	1.54805	2.03885	1.8565
	1.93744	2.11735	1.27862	1.85271	1.71205
	1.83119	2.03423	2.03103	1.94092	1.60691
	2.122	1.15155	2.00199	1.87837	1.23629
	1.40666	1.8359	1.25363	1.26018	1.53811
	1.61213	1.23188	1.73715	1.59684	2.0765
	1.93673	2.74421	1.55637	1.61562	2.02442
	1.08872	1.64515	1.33939	1.87207	1.26524
	2.21058	1.58793	1.17802	1.46065	1.14425
	1.49635	1.33459	2.30666	0.818608	1.37834
	1.86702	2.57053	2.70955	1.65711	1.97171
	2.24403	2.63915	2.48626	2.26591	2.54248
	2.59956	2.05495	2.5143	1.67568	1.70718
	1.85648	1.37848	2.57361	1.25075	1.24028
	2.06396	1.85049	2.23864	2.79889	1.74274
	1.85729	1.54256	2.40411	1.45174	1.43125
	1.42568	1.8677	1.30296	1.31398	1.72911
	1.37534	2.40224	1.14089	1.63581	2.20939
	1.12754	1.53918	1.72786	1.17996	1.25832
	1.45824	1.77174	0.947731	2.33097	1.94663
	1.66842	2.60849	1.30642	0.878379	1.17234
	1.56512	1.61124	1.86743	1.97793	2.3807
	1.16844	2.01345	1.92407	1.61858	2.30493
	2.4723	1.73557	0.786053	1.43449	1.70823
	2.09384	2.42236	1.18128	1.44608	1.81183
	2.83885	2.62239	0.901088	1.9308	1.7434
	1.73974	1.63321	1.34308	1.27868	1.32489
	1.77632	2.45696	1.51964	1.04689	0.862511
	2.21696	1.49476	1.58632	0.908012	0.978185
	2.94206	1.36956	1.39734	1.19867	1.9702
	1.61682	1.89698	1.56831	1.25897	1.28445
	2.18989	2.03512	0.695396	2.01173	1.10805
	2.10341	1.65701	1.22953	1.65107	1.69101
	2.06076	1.75719	1.58884	1.43246	1.78482
	1.39348	1.72218	1.50746	2.12038	1.12377
	1.60052	1.9336	1.58725	2.37145	1.65116
	2.02242	1.26273	1.4538	1.60833	1.63163
	1.94542	1.27253	0.842083	1.40183	1.36605
	1.65756	2.11028	0.787981	1.65529	1.30184
	2.28957	2.12138	2.25203	1.24846	1.40723
	1.68422	2.03488	2.57064	0.451534	1.9933
	1.52111	1.4348	1.42489	2.09599	1.30597
	0.593064	2.22591	1.44256	1.5318	1.72785
	1.75372	1.755	1.59721	1.51908	1.47882
	1.43663	2.45338	1.39841	1.74341	2.28355
	1.58812	1.90385	1.27554	0.882648	0.951394
	2.21575	0.707414	1.61596	0.535262	1.58493
	1.50535	1.71287	1.47121	0.848463	1.77089
	1.95873	1.93091	2.44504	1.83859	2.27474
	1.4578	2.5617	1.11104	1.43858	2.01443
	2.44494	2.15684	1.45244	1.19323	1.75538
	1.81132	2.06934	1.12579	1.46515	1.90778
	1.52155	1.43089	1.69503	0.961295	2.09763
	1.77903	1.91133	1.46636	1.5282	1.59811
	1.89221	1.84099	1.85031	1.1726	1.53358
	2.05384	2.92398	0.878918	1.86316	0.785024
	1.65984	1.86924	2.66246	0.857299	1.45113
	2.06975	2.06068	2.25058	1.93433	1.47228
	1.86208	1.84755	1.19447	1.01409	1.9914
	1.88889	0.828932	2.49547	1.42559	0.689601
	1.96467	0.743133	0.884788	1.79953	1.00957
	1.21003	2.01988	2.92034	2.02964	1.863
	2.21658	1.85753	1.49085	0.925173	1.90772
	2.40996	1.77965	1.18894	1.5591	0.998084
	2.01221	1.36647	2.41413	1.26237	1.1587
	1.70855	1.27854	3.5208	1.52064	1.23405
	1.0469	1.68482	1.78968	1.32657	1.35135
	1.7637	2.1672	0.817934	1.18223	1.96268
	1.36069	2.06721	1.1078	1.63532	1.89983
	1.89548	1.63484	1.35123	1.79965	1.89893
	2.12486	1.67186	1.4706	1.83574	1.06355
	1.38	1.89444	1.03807	1.55529	1.34744
	2.27428	0.792136	2.94565	1.66791	1.14307
	2.00084	1.51849	1.65807	0.94194	2.72741
	2.09317	2.30845	0.883628	1.97239	1.10912
	2.04242	1.89806	1.08281	2.36191	1.51747
	2.6094	2.20349	2.10061	1.17937	2.15139
	1.04647	1.32599	1.19849	2.58126	1.37159
	2.61291	2.39191	1.97139	0.993324	1.51408
	1.93354	1.47531	1.72002	1.50619	2.20822
	2.35964	2.09743	1.92181	1.22406	2.03233
	1.60502	1.59097	1.00526	1.55574	1.0365
	1.7742	1.83419	1.64912	1.34268	1.24436
	1.63896	2.56808	2.8025	1.2142	0.939968
	1.81295	2.27345	0.6832	1.29893	2.01221
	1.1045	1.58275	0.97363	1.75647	1.60892
	1.0874	1.78826	1.63336	1.94642	1.47364
	1.31844	1.08752	1.88255	1.49823	0.906379
	2.14182	2.97961	1.41677	1.10009	1.59094
	2.62774	1.25612	2.96954	1.80168	1.7501
	1.527	2.18484	0.607991	2.01044	1.80481
	1.68668	1.5297	2.48648	0.995163	1.1994
	0.621972	1.96057	0.774386	1.2841	1.58186
	1.45855	1.77645	0.911205	0.969244	0.963506
	2.45388	3.31665	1.63598	1.3348	1.1853
	0.938849	1.97402	1.3111	1.10133	1.67518
	1.29561	1.99713	2.19654	0.967082	1.46094
	2.1129	1.36266	0.881243	1.92466	2.07281
	1.26131	1.57466	1.83405	1.90562	2.73861
	1.68108	1.27326	2.56873	1.76494	0.795568
	1.78988	2.22916	1.71217	1.80144	2.63135
	1.07367	2.75701	1.37783	0.997422	1.76479
	1.72608	1.44505	3.05818	2.1267	2.45825
	1.09448	1.46972	1.17108	2.04786	1.36578
	1.84236	2.88286	2.34673	1.62182	1.78583
	1.72949	2.19205	2.52612	1.61319	1.73712
	2.4807	1.9751	1.00272	0.884932	2.54713
	1.46747	1.96527	1.02654	0.952548	1.11323
	1.25104	1.26678	2.68327	1.1519	2.08083
	3.25483	1.7432	1.051	1.5184	1.10021
	2.25716	2.23911	2.21402	1.24858	0.90473
	3.11542	1.80799	2.0131	1.9735	1.94609
	1.37251	1.54319	2.14262	1.65119	2.67838
	1.15236	1.68933	0.905567	1.38545	1.93724
	1.60245	2.01254	1.92983	2.51731	1.74616
	2.16368	1.33401	0.949139	1.64452	2.0605
	2.05226	2.58841	1.52872	1.14753	1.44251
	2.14471	3.05866	1.69042	1.91774	1.77136
	1.82416	2.43194	1.58312	1.38306	1.38138
	1.69631	1.76378	1.31112	1.7565	2.24903
	1.61874	2.37496	1.63463	1.66192	2.30875
	2.16241	1.56043	2.21094	1.23618	1.4116
	2.55732	1.18446	1.09391	1.14545	1.99573
	1.57432	2.36646	2.38264	1.5923	1.48832
	1.61003	2.64856	1.89039	1.41962	1.62105
	1.47737	1.42898	1.83227	2.11118	1.5036
	1.06114	1.3446	2.30979	0.723136	1.89923
	1.95543	1.37905	2.48824	1.5926	1.14049
	2.27962	1.92185	1.79061	0.867687	2.40362
	1.68717	0.818393	1.09467	0.804253	2.86113
	2.26962	1.61503	1.61876	1.6295	1.17684
	1.4744	1.00513	1.57268	1.81255	1.46519
	2.61436	2.15985	3.22944	2.26838	1.7706
	1.32372	1.94884	1.87573	1.20143	1.23507
	2.96992	2.58035	1.14383	1.52466	1.70072
	1.35707	1.24582	2.63627	1.43982	1.45128
	1.32747	1.97937	3.07278	1.40061	1.12043
	2.05339	3.25169	2.93901	1.56986	1.31698
	2.07817	1.88401	1.33323	1.5169	1.13092
	1.96272	2.64902	1.18583	1.32118	1.08439
	1.86788	2.2152	2.82811	1.99893	1.35309
	1.7863	2.09305	2.4379	2.17076	1.59115
	1.9832	1.94933	2.93999	2.42448	1.44758
	1.87916	1.16563	1.84475	0.982606	1.59599
	1.38483	1.46767	1.88689	1.00305	1.91558
	1.26465	1.34636	1.17995	1.4084	1.27831
	1.48605	2.32903	2.39142	1.67329	1.76072
	1.37196	1.70962	0.972066	1.80474	1.05338
	1.20405	2.14402	1.37641	1.63789	1.28239
	2.5268	2.3031	2.26607	1.65011	1.68205
	1.52266	2.6276	0.759299	0.556088	2.63427
	1.36284	1.83369	1.34827	2.07057	0.891818
	1.41142	1.88796	1.5012	1.97257	1.12355
	0.748876	1.11368	1.25193	1.96073	1.70542
	2.66434	1.34587	1.69912	2.03951	1.7327
	1.95681	2.0291	1.28586	1.02082	2.1374
	1.64542	1.27832	0.897167	1.59749	1.13642
	2.53533	1.81207	2.47799	1.51032	1.50643
	2.73546	1.56917	0.951657	1.32448	1.81227
	2.39596	2.00566	1.45171	1.52508	1.75855
	1.66528	1.50145	0.771449	1.31236	1.46158
	2.08646	1.84375	2.17575	2.69706	2.61302
	1.29062	2.10369	1.8348	1.33841	2.17112
	3.0268	1.26221	0.914841	1.44854	2.05897
	1.77903	1.54692	2.19332	1.47567	1.53922
	1.07956	2.87656	1.38839	1.84081	1.50653
	2.31262	3.68324	2.249	1.48247	1.1497
	1.61811	2.38992	1.19692	1.2359	2.20102
	2.17253	1.43508	1.64116	1.20935	1.25551
	1.86267	3.14133	1.0419	1.51417	2.45775
	1.27598	0.7804	2.49327	1.86046	2.18742
	1.91365	1.48223	2.41199	1.75537	2.43671
	1.3883	1.06072	1.89046	1.51625	1.54483
	1.64641	2.1233	2.44546	1.20479	1.49386
	1.47712	2.21938	2.96631	1.48714	1.78341
	1.45713	1.75957	1.67731	1.91465	1.55631
	1.99964	1.85553	2.41009	2.72438	2.09354
	1.93779	1.83959	2.54049	0.84211	1.46089
	1.48084	2.05193	1.6419	1.61727	1.04686
	1.74588	2.01965	2.34281	1.18911	1.10976
	2.49295	1.40292	2.48916	1.03149	1.86929
	1.95225	1.92929	1.80185	1.89109	1.39931
	2.69424	1.90303	1.60556	0.769484	1.23331
	2.20753	1.90108	1.45838	2.19362	2.20988
		1.63984	2.48716	3.97644	0.536712
		2.14014	1.81586	1.56589	1.55964
		1.6572	1.77755	1.73001	0.881402
		2.27404	1.9863	2.83559	1.56674
		1.67598	1.39873	1.37988	1.28077
		1.62156	1.95228	0.669707	0.787981
		1.27735	0.91848	1.43419	1.58989
		2.29823	1.4051	1.47253	1.79789
		1.81202	2.79563	2.32868	1.81276
		3.02093	1.22315	0.735884	1.2715
		2.81217	2.30257	0.610138	1.2725
		1.46724	1.72404	1.23885	1.83006
		2.50101	1.95486	0.593064	1.14108
		2.02426	2.41691	1.46165	0.90694
		2.76537	3.17715	1.53981	1.57622
		2.14772	1.4757	2.13127	0.542986
		1.8709	2.88895	1.0851	1.10262
		2.35664	1.23234	1.88908	2.33426
		1.86524	0.776344	2.4714	0.687538
		3.19647	0.905675	1.27583	1.31041
		1.65756	1.93205	0.832338	1.42762
		1.80558	2.46184	1.23226	1.30628
		2.12266	2.49317	1.3457	1.39993
		2.96233	2.0467	1.08237	1.39916
		1.83005	2.71656	1.86443	1.06167
		2.64929	2.92401	2.07177	1.57388
		2.19095	0.451534	1.91216	1.98424
		1.18564	1.97032	2.75439	1.81143
		1.58773	0.821865	1.31332	1.53754
		2.37447	2.13005	0.956679	1.79669
		1.85504	1.75838	1.43305	1.25284
		2.25193	1.36449	1.35795	1.38429
		2.0325	0.501938	1.25619	1.80874
		2.56041	1.09309	1.67591	1.20629
		2.8064	1.06922	1.74697	1.06904
		1.62084	1.31291	1.28362	1.10286
		2.47085	2.17257	1.6748	1.89964
		4.07204	1.61515	1.4184	1.53518
		1.5067	2.21111	1.12591	1.84614
		2.78373	2.77034	1.06829	1.1347
		2.75872	1.91669	1.92615	1.20373
		2.01222	2.81005		1.1228
		2.14269	3.38974		1.77276
		2.1425	1.69537		1.57216
		1.52879	2.16861		1.50358
		1.68739	0.359056		2.11033
		2.38431	0.529313		1.94973
		1.9863	1.49615		1.65023
		2.34088	2.10226		0.958613
		1.71092	3.07779		1.61809
		1.69404	0.765628		2.92327
		2.99899	2.67973		3.58384
		2.16569	1.92481		2.5121
		1.73114	2.54887		1.72743
		2.32624	0.994679		1.64576
		1.49496	1.29366		2.36771
		2.48437	1.14278		1.46581
		2.20961	0.559608		2.58533
		1.82639	0.821018		1.51133
		2.47889	0.744741		1.59395
		3.16849	1.00531		1.63879
		0.952662	2.58478		1.53393
		1.6101	1.04824		1.57759
		1.9164	1.5144		1.71277
		1.48999	0.709746		1.48272
		2.6973	0.843641		1.37901
		2.74773	2.74045		2.29943
		2.49979	1.26489		2.07515
		1.53105	0.721972		1.75137
		1.6509	3.10908		1.10368
		3.60141	1.78012		1.16364
		2.24605	1.03268		1.28289
		1.82459	1.67696		1.35242
		0.816905	1.70889		1.48409
		1.71976	2.58856		1.31129
		1.57551	2.29792		1.11027
		2.40082	4.06564		1.82263
		1.36257	1.701		1.68519
		2.76196	1.99665		1.87842
		2.55307	1.81371		0.919777
		1.87272	2.08798		0.69698
		2.62946	1.45055		1.84582
		1.98634	0.4701		1.16866
		1.49839	1.38736		2.5189
		1.82878	1.8873		1.91299
		1.83836	2.02075		1.95054
		1.73461	1.8196		1.47233
		1.56515	1.69054		2.07152
		1.25779	1.07795		1.16256
		2.596	0.443609		1.37539
		2.80538	1.92078		2.07851
		2.5477	1.73821		1.84463
		1.80064	1.77026		1.14574
		2.09954	1.29529		2.83338
		2.54338	1.03527		2.16337
		1.99319	0.956038		1.67733
		2.58318	0.93331		1.27787
		2.73794	2.05376		2.02845
		1.96941	1.73168		1.44208
		2.21174	2.74422		1.02529
		1.09417	3.10304		1.37048
		3.26835	1.13672		1.29754
		2.00267	0.672019		1.23644
		2.58991	1.94541		0.997658
		2.07428	0.729999		1.14971
		2.49323	2.45355		1.89993
		1.89692	2.0932		1.45363
		2.16734	2.50026		1.867
		2.54457	1.47124		1.24239
		3.19661	0.874369		1.45225
		1.67429	1.37086		1.8857
		2.18354	1.17518		2.24037
		1.81363	0.759217		1.31308
		1.88489	1.54394		1.2233
		3.87053	1.55416		2.80735
		1.98257	1.85805		1.4687
		2.04618	2.31729		1.28655
		1.68226	0.953911		0.777545
		1.65093	0.559225		2.01628
		2.12609	0.489271		3.16035
		2.09658	0.870782		1.62095
		1.52001	0.949716		1.38975
		2.01081	0.411032		1.57959
		1.99446	0.554457		1.40161
		2.00083	1.79542		1.46248
		1.70975	0.562101		1.8348
		2.20631	1.67753		1.64233
		1.56271	1.33567		1.33578
		1.93857	1.62513		0.90132
		2.41018	2.25938		0.693604
		1.44705	1.32471		1.86033
		1.95777	1.67803		1.69328
		2.07636	1.95101		0.980792
		1.73782	1.51872		1.29852
		2.49623	0.901415		2.20264
		2.75885	1.68187		0.977239
		0.976565	2.22483		1.03254
		1.61717	1.98624		1.46101
		1.63773	1.53805		1.7587
		1.94187	1.91116		1.23577
		1.24138	1.82288		2.16584
		3.03807	1.45489		2.08644
		1.74381	1.40892		1.5671
		1.22554	1.29479		1.35865
		1.64305	1.88749		2.04008
		0.902408	1.49217		1.14665
		0.789663	1.66183		2.71
		2.8583	2.57139		1.78062
		3.16172	1.76015		1.32278
		1.59191	1.81535		0.847867
		1.29894	1.59151		1.5905
		2.39624	2.22476		1.1505
		1.42838	0.979652		0.913599
		2.06718	3.67069		1.39586
		1.58594	2.63575		2.80025
		1.81539	2.08439		1.53784
		2.91999	1.93263		1.27356
		2.65545	1.26319		1.23474
		2.30955	1.98231		1.37991
		3.10853	1.49228		1.63311
		1.75056	0.710039		1.84528
		2.37178	1.2348		1.82575
		1.75595	1.257		2.09823
		2.20906	1.35729		1.12043
		3.21701	1.74078		1.74574
		1.96839	1.42671		1.86233
		1.20473	0.876598		1.6242
		2.11893	1.87204		2.16465
		1.18277	1.52032		1.19179
		2.17471	2.16128		0.94696
		1.87365	1.93127		1.29189
		3.04543	0.985918		1.24109
		1.88223	2.05298		1.5252
		2.48524	1.70542		1.3421
		1.65558	1.68606		0.828443
		1.95405	2.08568		1.32702
		2.44055	1.15594		1.85892
		1.36888	1.76306		2.02168
		1.26349	1.13507		2.21363
		1.83422	0.901612		1.71465
		0.919459	2.61078		1.7075
		2.12449	1.3469		1.46096
		1.75761	1.3173		1.48872
		1.70813	2.37857		0.97582
		1.26384	1.81314		0.904805
		1.63207	1.6947		2.07058
		2.65854	1.77945		1.9983
		2.51619	1.4657		1.45622
		1.81685	1.26269		1.43122
		1.80549	1.61028		1.69174
		2.06745	0.721879		1.02854
		2.19099	0.749762		1.53616
		1.10505	0.701141		1.88727
		1.20625	1.60753		1.30713
		2.50857	1.26018		1.25697
		2.22535	1.58834		1.52924
		0.649907	0.94183		1.34993
		1.06852	1.66297		2.05141
		1.43359	1.21099		1.84637
		2.52715			1.37595
		0.833671			1.7168
		2.57083			0.877382
		1.80512			2.20409
		2.13245			1.56087
		1.70835			1.22694
		2.26476			1.26299
		2.45743			1.808
		1.96832			1.08965
		2.33075			1.52198
		1.76441			1.47043
		2.68245			1.3145
		1.60903			2.47415
		2.2518			2.26686
		2.6617			1.5712
		2.48022			2.04109
		2.36336			1.06306
		2.26214			2.76241
		1.6312			1.35031
		2.2234			1.84623
		1.60398			1.78592
		2.83995			1.99151
		1.74581			1.45339
		2.01682			2.0323
		3.58356			1.52676
		2.10387			2.18036
		1.92872			2.3043
		1.76957			1.67962
		1.65255			1.86918
		2.5816			3.023
		2.01046			1.39469
		2.12152			1.34431
		1.9616			2.85365
		2.12006			1.54087
		1.86553			1.36229
		1.72026			2.29005
		1.77896			2.82504
		2.43003			1.5489
		1.94095			1.71793
		1.4783			1.6652
		2.20056			1.65194
		1.4979			1.26303
		2.31329			1.31509
		1.52057			2.41707
		2.32666			1.00648
		2.22009			1.50001
		1.47103			1.50783
		1.10656			1.57163
		2.80597			1.5082
		2.4451			0.879104
		1.53599			1.1651
		1.65756			1.41818
		0.451534			0.958532
		1.86322			2.06269
		1.80135			1.44361
		3.11938			1.94836
		1.9237			1.34895
		1.66136			1.74701
		2.1342			2.15795
		3.43858			1.32508
		1.58257			1.8472
		1.90006			1.6218
		2.33597			1.87383
		1.59751			1.96831
		1.38556			1.92629
		1.42305			1.8689
		1.38885			1.23453
		0.936394			1.33534
		2.05892			1.53558
		2.80373			1.89934
		1.56138			1.4633
		1.51548			1.84732
		0.991759			2.18736
		2.69296			2.54467
		0.959879			1.65672
		1.35738			2.60862
		2.82557			1.0008
		1.56035			1.33845
		1.83902			1.92986
		1.76231			1.92287
		1.80394			2.44121
		1.15979			1.52261
		1.01844			1.66277
		1.70107			2.26387
		1.38373			2.38955
		0.603526			2.08705
		1.66238			2.26929
		1.34803			1.90795
		1.76258			2.63672
		0.727914			2.15531
		2.29507			1.65883
		2.11875			2.35084
		1.64155			1.5916
		1.2856			2.24631
		2.07698			1.31548
		1.04739			1.28173
		2.61917			1.5497
		2.52582			1.22268
		2.11129			1.74458
		1.70347			1.36683
		1.82979			1.21837
		3.00046			2.90969
		3.10481			2.78699
		2.40365			1.80725
		1.51001			1.73117
		2.45311			1.5779
		2.59943			1.58762
		1.76153			1.52983
		3.05691			2.46081
		2.57022			2.69014
		1.24041			1.66445
		1.48609			1.54413
		1.962			0.99156
		1.93413			1.45453
		1.7491			0.846492
		2.26172			2.38913
		1.65597			2.75426
		2.12005			1.66759
		1.99451			1.58131
		1.80487			2.2131
		2.24116			1.28028
		1.47849			1.88422
		2.61315			1.03809
		1.96398			0.741663
		1.83979			3.40961
		1.32411			1.7067
		1.35238			2.02737
		1.02697			1.73428
		0.789438			2.73024
		2.03745			1.32703
		1.42792			1.14826
		1.20513			1.17641
		2.78195			1.46065
		1.86946			1.34594
		1.61766			2.74696
		1.94075			2.16994
		2.16272			1.6829
		1.521			1.70121
		2.37992			1.88327
		2.23005			2.47644
		2.45941			2.26688
		1.82346			1.90577
		1.54396			1.30026
		1.60388			2.62864
		2.06807			1.94645
		1.25043			1.50784
		1.8869			1.86841
		1.55767			1.34674
		2.11782			2.78729
		1.43332			1.18348
		1.27992			1.57123
		1.54625			1.24736
		2.75616			1.72611
					1.55594
					3.34734
					1.41202
					1.85337
					1.67834
					1.96057
					1.6558
					1.76117
					1.73414
					1.41988
					2.04362
					1.46719
					1.68604
					2.0327
					1.53654
					1.69837
					2.71836
					2.74152
					1.71477
					1.96735
					1.80876
					1.05422
					2.11173
					1.44301
					1.66681
					3.03825
					1.19992
					1.56925
					1.89715
					1.8408
					1.55777
					1.27546
					1.85353
					2.64242
					0.741581
					1.98143
					1.01427
					2.49675
					0.915935
					2.45462
					1.93865
					0.928831
					2.01493
					1.80617
					2.52875
					2.26551
					1.49326
					1.29219
					1.56848
					0.96403
					1.88777
					2.3311
					1.15286
					1.92128
					1.47442
					0.952233
					1.3905
					1.2869
					1.695
					2.10535
					1.63609
					1.41394
					1.92894
					2.11309
					2.17575
					2.36255
					1.84815
					2.18328
					2.65837
					1.41821
					1.07734
					2.76968
					0.895779
					1.55126
					0.974254
					2.3588
					2.15171
					1.75781
					1.95026
					1.81208
					1.26261
					1.70924
					2.68436
					1.68557
					0.990927
					0.874258
					1.69633
					2.13959
					1.22622
					1.43956
					1.60835
					1.54319
					1.31011
					2.15811
					1.02817
					2.36405
					1.55832
					1.33072
					2.34504
					2.31345
					3.18497
					1.18924
					1.53587
					2.65974
					1.50065
					1.64213
					3.02112
					1.69008
					1.7591
					2.05584
					1.64753
					1.32448
					1.6192
					1.92708
					1.36644
					1.50741
					1.58653
					1.37479
					2.01241
					2.03205
					0.709861
					1.44832
					2.27086
					3.33033
					1.96285
					1.18567
					1.77219
					1.88834
					2.13299
					1.8843
					1.99764
					1.0804
					1.07265
					2.25565
					1.88825
					2.3266
					1.36672
					1.63813
					1.11931
					1.82038
					2.11613
					2.40765
					2.5765
					0.963438
					1.21293
					2.36155
					1.47701
					1.89954
					1.16785
					1.2066
					1.48573
					1.42808
					2.13259
					2.45957
					2.34962
					1.48257
					1.73724
					1.81677
					1.15623
					1.53925
					2.23019
					2.21902
					1.30589
					1.60177
					1.48689
					1.652
					1.65503
					1.54745
					1.30733
					2.90084
					2.28206
					1.68714
					1.04388
					1.96795
					1.9719
					2.49541
					1.47344
					1.74677
					1.78008
					1.26521
					1.04863
					0.775499
					1.87038
					1.22296
					1.30303
					2.15735
					2.08748
					2.42082
					1.67839
					1.9764
					1.20415
					1.37036
					1.59448
					1.76686
					2.11625
					1.66816
					1.82389
					1.68788
					1.91019
					1.07517
					2.12948
					2.12322
					1.30746
					0.731906
					1.63367
					1.83397
					1.80041
					1.9804
					1.55264
					1.1882
					0.451534
					1.32368
					1.66761
					2.63476
					1.27097
					1.5057
					1.71876
					2.09131
					0.938892
					3.12926
					1.44469
					1.19789
					1.81135
					0.976695
					1.05911
					1.16766
					1.79251
					1.28764
					1.66413
					2.81807
					1.44321
					2.10954
					0.591475
					1.60125
					1.86791
					1.27498
					0.689555
					1.08728
					1.60502
					0.900671
					1.92715
					1.73107
					1.27179
					0.501331
					2.31076
					1.35915
					1.89121
					1.55964
					0.476971
					1.98551
					1.37132
					0.912589
					2.2066
					1.37269
					1.22582
					0.856702
					0.824049
					1.30131
					1.03733
					0.830601
					2.18888
					1.0562
					1.79543
					1.69541
					1.56011
					0.405512
					0.750392
					0.978914
					1.52185
					1.47039
					1.40257
					2.42652
					2.11273
					0.73148
					1.31032
					1.09218
					1.72109
					0.93135
					1.42466
					0.788789
					1.43763
					1.83418
					2.17779
					1.60809
					1.30296
					1.39877
					2.07476
					2.1379
					1.13491
					0.820584
					0.816385
					0.78721
					0.977824
					1.26147
					1.51259
					1.24712
					0.926713
					1.23318
					1.78145
