# Supplementary material for: Antibiotic-induced accumulation of lipid II synergizes with antimicrobial fatty acids to eradicate bacterial populations
Source: eLife. 2023 Mar 6;12:e80246. doi: 10.7554/eLife.80246 (PMC10030119; doi:10.7554/eLife.80246)
Supplement: Figure 4—figure supplement 5—source data 1. [file elife-80246-fig4-figsupp5-data1.xlsx]

## Sheet: Fig. 4A
	Time (h)	DAP10						DAP + PA
	0	8.18	8.04	8.15	8.23045	8.04139	7.95424	8.30103	8.32222	8.25527	8.18	8	8.23
	0.5	6.85	7.11	7.04	7.54407	7.27875	7.54407	7.11394	7.32222	7.14613	6.64	7.18	6.76
	2	5.49	5.45	5.54	5.47712	4.70757	5.34242	4.72428	5.30103	4.87506	5.68	5.57	5.43
	6	3.65	3.76	3.6	3.32222	3.47712	3.6902	2.77815	4	2.69897	4.49	4.61	3.72

## Sheet: Fig. 4B
	Time (h)	Untreated						PA 11						VAN 20						PA + VAN
	0	7.86	7.96	7.93	8.07918	8.25527	8.07918	7.76	7.92	7.88	8.04139	8	8.20412	7.78	7.97	7.89	7.85733	7.97313	7.79239	7.79	8.3	8.18	7.78533	7.81291	8.11394
	0.5	8.43	8.43	8.53	8.49136	8.43136	8.23045	7.52	7.56	7.58	7.60206	7.86332	7.5682	7.43	7.62	7.6	8.11394	8.30103	8.14613	4.83	6.53	4.78	5.6902	5.17609	5.25527
	2	8.59	8.61	8.62	8.65321	8.6721	8.79239	7.18	7.53	7.49	8.23045	8.51851	7.62325	7.34	7.61	7.62	7.39794	7.44716	7.38021	4	5.67	4.57	5.30103	4.23045	4.25527
	6	8.53	8.54	8.6	8.88649	8.86332	8.81954	8.58	8.68	8.66	8.85733	8.81954	8.73239	6.65	6.89	6.85	6.61278	6.62325	6.59107	3.04	4.3	3.64	3.95424	3.20412	3.36173

## Sheet: Fig. 4C
	Time (h)	Untreated						PA 11						VAN 20						PA + VAN
	0	7.93	7.83	7.82	7.81291	8.04139	7.91381	7.86	7.93	7.93	7.8451	8.25527	8.04139	7.91	7.85	7.92	7.97313	8.14613	7.83251	7.85	7.94	7.88	7.86332	7.86332	7.86332
	0.5	8.4	8.51	8.45	8.34242	8.44716	8.41497	7.56	7.49	7.63	7.4624	7.38021	7.5563	7.65	7.86	7.93	7.94448	8.14613	8.07918	4.93	5.2	5.46	5.38021	5.23045	5.27875
	2	8.58	8.59	8.48	8.69897	8.90309	8.6902	7.46	7.48	7.73	7.49136	7.20412	7.5682	7.59	7.68	7.65	7.44716	7.41497	7.32222	4.36	4.65	4.28	4.54407	4.30103	4.4624
	6	8.59	8.49	8.58	8.70757	8.87506	8.75587	8.86	8.72	8.72	8.75587	8.81291	8.81291	6.63	6.8	7.3	6.34242	6.39794	6.32222	3.23	3.18	3.08	3.11394	3.64345	3.88081

## Sheet: Fig. 4D
f
	Time (h)	Untreated						PA 11						VAN 20						PA + VAN
	0	7.88	7.85	7.84	7.87506	7.94939	7.8921	7.85	7.9	7.88	7.85126	7.90848	7.81954	7.9	8.2	8.08	7.79934	7.88081	7.81291	8.11	7.94	7.78	7.8921	7.92428	7.95424
	0.5	8.4	8.36	8.28	8.43136	8.34242	8.44716	7.56	7.46	7.49	7.51851	7.54407	7.51851	7.49	7.41	7.51	7.96848	8	8.25527	4.96	4.79	4.38	4.78533	4.38021	4.66276
	2	8.52	8.53	8.61	8.54407	8.6902	8.66276	7.04	7.38	7.11	8.14613	7.66276	7.62325	7.53	7.56	7.41	7.30103	7.44716	7.5563	4.34	4.82	3.51	4.47712	3.50515	3.94939
	6	8.73	8.63	8.72	8.9345	8.82607	8.78533	8.72	8.62	8.77	8.88081	8.78533	8.76343	6.68	6.68	6.76	6.61278	6.50515	6.32222	3.85	4.04	2.3	3.79934	3	3.79239

## Sheet: Fig. 4E
	Time (h)	ZA (50uM)			ZA + VAN			ZA + VAN + PA
	0	8.15	8.15	8.08	8.32	8.08	7.74	8.11	8.15	8.08
	0.5	8.36	8.23	8.23	7.79	7.76	7.46	5.53	5.54	5.73
	2	8.23	8.36	8.4	6.78	6.85	6.8	4.54	4.34	4.83
	6	8.59	8.64	8.45	5.66	5.59	5.63	2.95	2.95	3.56
