# Supplementary material for: Antibiotic-induced accumulation of lipid II synergizes with antimicrobial fatty acids to eradicate bacterial populations
Source: eLife. 2023 Mar 6;12:e80246. doi: 10.7554/eLife.80246 (PMC10030119; doi:10.7554/eLife.80246)
Supplement: Figure 4—source data 1. [file elife-80246-fig4-data1.xlsx]

## Sheet: Fig. 4D
30 minute foci data as a percentage of the total population
		0	1	≥2
	PA + VAN(20)	51.7532	39.8102	8.43659
	PA + VAN(10)	66.7939	30.916	2.29008
	PA(11)	85.0451	13.3591	1.59588
	VAN(20)	94.1586	5.06028	0.781117
	Control	86.1502	12.9108	0.938967

## Sheet: Fig. 4E
30 minute cell volume overall
		Control	VAN(20)	PA(11)	PA + VAN(10)	PA + VAN(20)
		1.40682	0.57506	0.451534	1.20129	0.443609
		1.80691	0.849129	1.23578	1.13644	1.82938
		1.74586	0.970579	1.24068	1.95952	1.56586
		0.967659	0.786405	1.09972	0.935629	1.1246
		0.948047	1.14376	0.713244	1.43348	1.46285
		1.05122	1.84945	1.57854	0.748126	1.92441
		1.65662	2.98612	1.25802	2.04705	1.19331
		0.691843	2.59309	1.2314	1.61416	1.11571
		1.15856	1.60266	0.889013	0.748887	1.02766
		1.80248	3.68821	0.985087	1.44612	0.665068
		1.32273	1.12189	2.20817	2.7414	1.19852
		1.86412	1.4224	0.819405	1.19535	1.18681
		2.19397	2.5719	1.16732	1.34229	1.32004
		0.576446	1.76382	0.856568	0.921615	1.20494
		0.542986	1.666	1.88588	1.05355	0.740855
		1.72281	0.901244	2.07254	1.45622	1.30725
		0.927028	1.34496	1.14425	1.21463	0.664907
		1.6671	2.23354	0.924029	1.30525	0.897328
		2.67198	1.47045	0.701843	1.39473	1.33493
		1.53666	1.16745	1.71091	1.11035	0.681059
		1.89106	0.517811	0.984587	1.72332	1.62361
		1.34693	2.24162	1.43268	1.50467	1.01673
		1.90918	2.07925	1.41582	1.45964	0.875954
		1.4212	2.07656	1.83554	0.874066	1.4891
		2.2895	1.46631	1.56058	1.39739	1.71324
		1.47068	1.91407	2.35149	1.18027	0.568514
		1.64003	2.46797	1.06969	1.35654	0.896799
		1.96378	2.25316	1.48472	1.43643	2.04922
		1.66731	1.95683	1.35249	0.974192	1.23815
		3.72364	1.51616	1.36132	0.75137	0.359056
		1.04296	0.703305	1.64406	0.70045	1.11677
		1.95542	0.829401	2.29632	1.82704	0.581176
		2.17418	2.41571	1.10318	1.29153	1.86415
		1.51128	1.67057	1.19588	2.04303	1.09048
		0.939153	1.16765	0.962191	0.789542	0.629439
		1.39747	2.03948	1.12798	0.89915	1.6879
		1.07546	2.26466	0.943659	1.96035	1.91529
		1.58311	2.33689	1.16578	1.72722	1.1775
		1.40136	1.6229	1.26656	1.00581	1.42275
		1.59449	2.31694	1.28806	0.607991	1.30049
		1.14679	2.26336	1.10745	0.589633	0.568396
		0.832269	2.23382	1.17465	1.51133	0.359056
		1.92206	3.36418	0.815666	1.55936	1.932
		1.33107	0.782346	1.09333	1.00944	1.21311
		1.03819	2.03651	1.52942	0.663463	1.18956
		0.943916	0.497318	1.29252	1.35537	2.8165
		1.00068	1.23575	2.07498	1.50499	1.03287
		1.39132	3.07671	1.80426	1.18417	1.55962
		2.13172	1.21563	1.44409	1.20886	1.31164
		0.922253	2.06107	2.25748	1.21971	2.16368
		0.893196	2.22653	1.75589	0.826867	1.28291
		1.51788	1.75856	1.41779	3.49007	2.58077
		2.90503	1.33892	1.12343	0.8648	1.19269
		0.868787	1.50914	0.825973	0.763828	1.15525
		1.37103	2.35113	0.752648	1.43374	0.897277
		1.56056	1.43309	1.52737	0.954225	1.97805
		1.61904	1.73561	0.812826	0.791498	0.964968
		0.914542	1.39011	2.0308	0.769573	1.47351
		0.75352	1.89754	0.921834	1.25388	0.740792
		1.51481	0.973878	0.882548	2.30931	1.13634
		1.14012	1.18157	1.06008	0.741855	0.90689
		1.19346	2.25705	1.23489	1.16263	0.833574
		1.72026	0.600547	1.2109	0.795195	1.41141
		0.802888	1.78134	1.83207	0.670818	0.359056
		0.753597	1.11323	1.14488	0.987267	1.1082
		1.17861	1.54787	1.30423	1.34524	1.25987
		1.34973	1.94032	1.92011	0.949888	1.70595
		1.9407	1.09749	1.30593	1.82621	1.83246
		1.06396	2.16224	1.22305	1.75103	0.476971
		0.66999	1.97475	1.70649	2.12188	1.59001
		1.35279	1.36224	1.29144	1.16492	1.64644
		1.55979	1.00852	1.14629	0.959869	1.13601
		1.02722	2.03758	2.16151	1.6957	1.1685
		1.57917	1.42527	1.68903	2.90414	1.5512
		1.10355	3.40831	0.932013	1.14695	1.21138
		0.53786	1.92555	1.2337	0.823003	1.15447
		1.68308	1.76834	1.3811	1.79864	1.66573
		1.41787	0.939183	1.56669	1.78329	1.50044
		1.04569	2.05843	0.861131	2.13608	1.19579
		1.4932	1.91631	1.61096	1.66087	2.44166
		1.65191	1.39799	1.81963	1.24703	1.23313
		1.09562	1.08658	1.62877	1.75007	1.76012
		1.45766	1.24262	1.21378	0.840203	2.3908
		0.543323	2.23214	2.6666	1.37268	1.62437
		0.990941	1.35559	0.853512	0.763135	0.628863
		1.03254	2.27989	1.92877	1.52735	0.973692
		1.61336	1.64856	1.91383	2.59597	2.49467
		2.23552	1.21259	1.48412	1.43534	0.948308
		1.03085	1.69306	1.50089	1.19992	1.39577
		1.37878	1.17648	0.602398	1.15085	0.568514
		2.03786	0.931707	1.99082	1.38032	0.696925
		1.73168	2.4495	1.79629	1.43785	0.933114
		1.37993	1.83614	1.52391	1.69969	1.88219
		1.53847	1.00756	2.38419	1.84463	1.08115
		1.85911	2.05312	1.82134	1.0936	1.32617
		1.65967	3.20936	0.587617	1.78469	2.70077
		1.88023	1.98779	0.758494	1.10538	0.526617
		1.14916	1.92451	1.53516	1.42297	0.725707
		1.84275	1.92189	2.77624	0.724662	0.359056
		2.23622	1.59726	2.53107	1.64613	1.45753
		1.09965	1.70029	1.25188	1.24816	1.16101
		1.52964	1.09422	1.11032	0.840042	1.71465
		1.48234	1.48497	1.75227	0.639096	0.976944
		1.49768	1.97736	1.44115	1.51338	1.19153
		1.58538	0.852699	1.08535	1.36969	1.28645
		2.24213	1.76958	1.79528	0.821962	1.67172
		0.997199	1.27809	1.52613	1.36493	1.53541
		1.59158	1.65434	1.27617	1.45197	0.944106
		1.18571	2.41559	1.64269	1.18173	0.604115
		1.77555	0.900599	1.01555	1.45483	0.68013
		1.65439	1.198	1.95605	0.884854	1.28061
		1.48984	1.91161	1.29353	0.527271	2.46572
		2.00276	2.39889	1.3872	1.11556	2.03322
		1.03035	1.27457	1.71452	0.791719	0.713431
		1.15414	1.1761	0.806994	0.775864	1.98634
		1.13218	1.63579	1.39739	1.60524	0.944247
		1.38202	0.63945	0.635608	0.707481	0.862216
		2.1232	2.87011	0.861006	0.941536	0.81077
		1.63335	1.17504	1.32534	0.562535	0.894668
		1.0531	1.70754	1.25516	1.82103	1.17907
		2.28545	1.87651	0.856056	0.98606	1.64762
		1.60115	1.84927	1.44572	1.2387	1.76438
		1.02866	1.37789	1.09519	1.1112	0.451534
		1.03923	1.22413	1.96717	2.03885	0.773079
		1.22254	0.65688	1.30561	1.85271	2.14037
		1.12339	1.95307	1.05357	1.94092	2.19674
		0.785124	0.983909	2.36839	1.09467	1.17925
		0.763994	2.37622	0.451534	0.784787	1.4712
		1.14341	0.514169	0.815123	0.629439	1.37099
		0.501938	1.31723	1.43579	0.759053	1.32176
		1.07156	2.59011	1.28706	1.87837	0.700085
		1.72891	1.56172	0.556432	1.25434	1.24553
		1.07384	1.35818	2.22166	1.09069	1.63205
		1.03384	1.65833	1.11612	0.829401	1.01013
		1.91013	1.08344	1.35149	1.49511	1.26294
		1.99324	1.71791	1.34262	1.26018	1.88959
		1.67318	2.80378	1.97064	1.59684	1.15118
		1.28038	1.74817	2.19142	0.928392	1.68122
		2.6687	1.72753	1.96287	1.56386	1.46575
		1.10232	2.45845	0.821217	1.19826	1.63175
		1.02302	2.47994	1.9823	1.16069	1.13636
		1.10173	2.08085	1.08716	1.61562	0.967866
		1.61768	2.35799	1.76224	1.80891	1.20553
		2.59334	3.39161	1.72143	1.87207	0.743875
		1.11541	1.59303	2.11735	1.48645	0.881243
		1.82599	2.17848	1.86198	0.85847	0.593064
		1.13968	1.45188	1.47054	0.681059	1.23539
		0.873569	1.45435	1.07903	1.46065	1.25612
		1.05764	1.70889	2.03423	1.08229	1.21342
		1.92571	1.77854	1.15155	0.881447	1.0314
		0.81123	1.77242	2.54003	1.59395	1.08178
		2.43529	0.980974	0.92258	1.6345	0.779349
		1.56878	1.6063	0.954386	0.818608	1.8565
		1.57966	1.53842	1.8359	1.65711	1.00296
		1.15838	2.83837	1.18649	1.00617	1.05756
		1.86967	1.63549	0.497318	0.927164	0.750222
		1.31855	1.93431	0.405512	1.9593	0.889744
		1.24598	2.12152	1.06482	2.26591	1.27841
		1.42786	0.971103	0.654579	1.67568	1.1025
		1.09737	0.929007	0.830901	1.25075	1.71205
		1.54341	2.06315	1.61297	2.79889	0.731544
		1.4669	2.04984	1.13734	1.55229	1.60691
		1.19497	1.64282	1.04324	1.45174	1.11104
		1.22441	2.1565	1.59043	1.51231	1.23629
		0.792544	1.40515	1.23188	1.22288	1.15954
		2.20363	2.75733	1.54343	1.31398	0.64643
		2.14253	2.09634	0.922846	0.938244	1.33916
		0.731772	2.52053	1.6341	1.63581	1.18961
		1.97826	1.8246	1.08652	1.17996	1.47367
		2.99573	1.53519	1.34946	1.04307	1.53811
		1.57441	1.55404	2.74421	2.33097	1.07993
		1.51089	1.97747	1.1544	0.779653	0.868108
		2.01524	1.41579	1.32962	0.878379	1.58802
		1.8823	3.15103	1.33863	1.97793	0.800004
		1.39647	2.30962	0.588612	1.61858	1.36647
		1.14234	2.79135	0.948047	1.43449	1.4144
		1.35186	1.2417	1.26053	1.23371	0.666887
		1.08092	1.84609	0.924348	1.44608	0.943788
		1.89936	1.81989	1.03115	1.40917	1.29036
		1.17351	1.46147	1.43011	1.83052	1.68137
		1.36252	1.46886	0.744129	0.640453	1.375
		2.02604	1.48539	1.07902	1.06203	0.796421
		2.69647	2.27824	1.1291	1.9308	0.502535
		1.84535	1.45779	1.70709	1.43602	1.35392
		0.962411	0.883078	1.72468	0.818608	0.64144
		1.29926	1.55654	1.64515	1.27868	1.40362
		0.981376	1.26266	0.864469	0.829345	2.0765
		1.4588	1.64484	0.977711	0.954414	1.13934
		2.00064	1.69818	1.1402	1.30784	2.15019
		2.08003	1.49961	0.826938	1.04689	2.02442
		1.18754	0.824363	1.27867	0.908012	1.06832
		1.83314	1.67088	1.58793	1.19867	2.13528
		1.55097	2.13479	1.16777	1.25897	1.22538
		2.43133	1.41992	1.33459	1.92711	2.24292
		1.91678	2.22406	1.62795	2.01173	1.88255
		2.00801	0.554457	1.57051	1.69384	0.859791
		1.27452	3.08363	2.57053	0.99764	0.835027
		1.7563	1.93023	1.30274	1.65107	1.43757
		1.18872	2.03296	0.844429	1.43246	1.53617
		1.76975	1.98095	2.29111	2.12038	0.863552
		1.38875	1.27498	1.20517	1.4302	1.40473
		1.59614	1.50812	0.968604	1.2319	0.942575
		1.63286	1.5313	1.89979	2.37145	1.38634
		1.749	2.47666	1.32351	0.713782	1.0151
		1.63125	2.9844	1.11769	0.554457	1.26524
		1.63822	1.58732	2.63915	1.60833	0.865785
		1.1287	1.00737	1.59052	0.559207	1.20488
		1.13481	2.39151	1.8888	1.39312	0.931285
		3.44347	2.33822	1.63935	1.40183	1.14425
		1.89411	1.58614	1.41076	1.25616	0.906662
		2.12561	2.61151	2.0263	1.06549	0.627496
		1.87331	2.40326	2.05495	1.36823	0.888297
		3.11144	1.14748	1.56649	1.65529	1.37834
		0.97742	2.32468	1.81618	1.18467	1.24831
		1.59395	1.8659	1.98878	0.716897	1.20924
		1.7709	2.12381	2.31336	1.24846	1.55599
		1.36094	1.03503	1.37848	0.451534	1.0714
		1.54019	1.64722	1.59728	2.09599	1.03365
		1.65984	1.37128	1.85049	1.5318	0.806955
		1.73473	1.99396	1.54256	1.00349	0.815103
		2.32916	2.03897	0.792955	0.884854	1.36762
		1.33072	3.08031	1.16844	1.14983	1.97171
		1.4018	0.735095	1.8677	1.3998	0.715605
		2.26528	2.36123	0.870169	1.25657	2.54248
		0.576224	2.39655	1.28681	1.51908	1.07004
		1.26079	3.19224	1.02741	1.74341	1.27106
		2.09012	1.46607	0.885346	1.01222	1.29954
		0.774786	2.11026	0.741007	1.17259	1.50547
		1.38742	2.15722	0.904258	0.405512	0.705101
		1.12172	1.73072	0.911911	0.882648	0.359056
		2.16546	2.05828	0.576629	1.11323	1.37391
		1.00955	2.17287	2.23431	1.25611	1.16937
		1.38599	0.750486	1.04844	0.828864	1.37829
		0.976093	1.88546	0.669094	0.535262	1.70718
		1.02615	1.82143	1.37687	0.848463	1.22384
		0.937033	0.961468	1.72186	1.50003	1.97689
		0.827724	2.67437	1.88594	1.83859	1.00581
		0.536712	2.87336	2.40224	0.767819	0.782273
		2.31893	1.74376	1.53918	1.11395	1.12595
		3.00784	2.38655	1.25334	1.08834	0.761029
		2.35216	2.091	1.62362	1.43858	1.17304
		1.19736	0.64144	1.47344	1.19323	1.30162
		1.39739	2.25923	1.2443	1.46515	1.24028
		1.49483	2.86679	1.53095	1.53835	1.36144
		1.29092	1.74196	1.77174	0.635608	1.74274
		1.38675	1.26795	1.08373	0.501938	0.642995
		1.12354	1.72555	2.60849	0.961295	0.4701
		1.54245	2.43524	1.04989	1.12557	1.17354
		2.13164	1.43732	1.39715	0.653155	1.43125
		0.884932	2.91639	1.55581	1.57401	1.72911
		1.94163	2.24119	1.1054	0.584171	0.821485
		2.38034	1.76737	1.61124	1.5527	0.854505
		1.16964	0.753001	0.99691	1.23106	1.0494
		1.9941	1.87905	1.84431	0.663824	2.20939
		0.654231	1.64139	1.57431	0.713924	1.0133
		1.67086	1.92015	2.01345	0.727271	0.960506
		1.42846	1.50086	1.25968	0.793654	0.540452
		1.75971	1.42449	1.01144	1.5282	1.25832
		0.920837	1.3794	1.73557	1.1726	1.94663
		1.69646	2.13786	1.16446	1.86316	0.882523
		1.95128	2.31375	2.42236	1.42165	1.72518
		1.07251	2.93126	0.921425	0.857299	0.802414
		1.63715	1.26941	1.40578	1.3489	0.896588
		0.793539	1.74042	1.13223	1.93433	1.18
		2.02645	1.03522	1.33232	1.01409	1.17234
		1.12838	1.10507	0.924029	1.01816	0.969583
		1.31011	1.39958	1.561	0.835966	0.983289
		2.2787	2.21076	2.73588	1.42559	0.740855
		1.0701	1.17058	2.62239	1.79953	1.01844
		2.08003	3.2498	1.75817	2.02964	1.27301
		1.91788	1.15329	0.816395	1.42662	2.3807
		1.62178	1.69016	1.37129	0.925173	0.882364
		1.05271	1.05731	1.42313	1.5591	1.26339
		2.18657	3.0743	1.38698	0.775277	1.20924
		2.06007	1.16182	0.635608	0.86351	1.16869
		0.768423	1.47079	1.63321	1.26237	1.10112
		1.15604	2.00479	0.802629	0.772726	0.810131
		1.6461	1.9519	1.03515	1.23212	1.17477
		0.999823	1.22599	1.54186	1.52064	0.903426
		1.70885	2.11078	2.45696	1.32657	1.20132
		1.76454	3.38745	1.6403	1.18302	1.02567
		1.42134	1.48718	1.49476	1.30758	1.08409
		1.54211	1.75429	1.01955	1.18223	1.25161
		2.2671	1.29923	1.15736	0.781609	0.741093
		1.50673	0.91208	2.06422	1.63532	1.26737
		1.29673	2.19545	1.36956	0.969292	2.30493
		1.5009	1.46682	1.48614	1.79965	0.661344
		2.45043	1.41493	1.89698	1.83574	1.17837
		2.17946	1.89374	2.03512	0.463193	1.21844
		1.49181	2.27515	0.965392	1.38869	1.70823
		1.69522	2.34391	1.25368	0.359056	0.761809
		2.22051	1.60934	0.359056	1.15882	1.81183
		1.92761	0.451534	1.70035	1.55529	0.758494
		1.75893	3.74353	1.65701	1.52673	1.0057
		1.23644	2.38772	1.17111	1.66791	1.72038
		2.12148	1.82644	1.90101	0.888724	1.23507
		1.76029	1.18559	1.44123	1.19605	0.973973
		1.6068	2.70523	1.34611	1.0095	1.7434
		1.16277	1.54924	1.88597	0.94194	0.843101
		1.02143	1.83212	1.27491	1.03229	0.584328
		0.997199	1.46107	1.61998	1.97239	1.16036
		1.76553	1.69902	1.76354	2.36191	1.07738
		2.26586	1.71151	1.11382	1.17937	1.2254
		1.02749	2.63953	1.14579	2.58126	1.32489
		1.28644	1.49065	1.78482	0.993324	2.18956
		1.49003	3.59054	0.842303	1.50619	0.862511
		1.2532	2.12636	1.75719	0.911216	1.01328
		1.79382	2.04219	1.18162	0.800511	1.37177
		1.91982	2.80696	1.72218	1.22406	0.978185
		1.14126	1.46599	1.9336	0.822865	0.646413
		1.43727	2.17649	1.21386	1.06282	1.13837
		1.44962	1.38319	1.38744	1.55574	1.9702
		1.50608	2.46845	0.860208	1.01461	1.19874
		0.924577	1.86596	1.26273	1.24277	1.28445
		1.33088	1.53262	1.27253	0.913599	1.3866
		1.07943	1.36786	1.14571	1.31816	1.28151
		0.769573	0.893232	1.8936	1.34268	0.463193
		1.71401	1.13956	2.11028	1.0429	1.18067
		2.21761	1.84578	2.12138	1.47052	0.501331
		0.924625	1.03199	0.709214	0.866403	1.10805
		1.87759	2.25767	1.16432	1.01603	0.794303
		0.733039	2.69291	1.34326	1.17917	1.69101
		1.59941	0.787387	1.54604	1.2142	1.78482
		1.88817	1.17172	0.793539	1.03887	1.34404
		1.44865	1.35713	0.600547	0.764449	0.983349
		1.75957	1.39531	1.27654	1.29893	0.893636
		1.80015	1.10896	1.59994	1.41718	1.12377
		1.79484	1.65927	1.02198	1.05485	1.15477
		1.9764	1.17962	1.31479	1.75647	1.09939
		1.57398	2.4606	1.13288	1.94642	1.11105
		1.90594	2.52062	0.920483	1.28882	1.17008
		1.30063	2.25969	1.32321	1.97738	0.463193
		2.38419	2.19026	1.08541	1.44054	1.69105
		1.57557	1.34487	0.632936	1.95725	1.1023
		1.26096	1.14867	1.12256	1.49823	2.55735
		1.82463	1.93247	1.31465	1.10009	1.06
		2.08399	1.18902	2.03488	1.80168	1.65116
		1.91991	1.31131	0.847929	1.00193	1.63163
		1.3262	2.05362	1.4348	0.527271	1.08546
		0.872136	1.65035	0.7579	2.01044	1.16125
		1.0447	0.514169	1.34781	0.829775	2.01154
		1.73546	1.67978	1.19517	0.995163	0.750172
		1.22359	2.013	1.08473	0.862912	1.80926
		1.73591	1.2097	0.882782	0.608945	0.760385
		2.02084	1.24433	2.22591	1.13739	0.661344
		1.19698	1.65042	1.755	1.2841	0.939554
		1.11999	2.65664	2.45338	1.203	1.07601
		1.34544	2.06776	1.01074	0.75836	0.663584
		2.19179	1.00778	1.32307	0.969244	1.49632
		2.67047	2.20954	0.951356	1.3348	0.996907
		0.938236	2.73292	0.761538	0.632765	1.36605
		1.29752	1.54365	1.7798	1.10133	1.19895
		1.68627	1.73941	0.957166	0.501938	1.53014
		1.38185	3.2703	1.50466	0.967082	0.710039
		0.651474	2.24422	0.94696	1.92466	1.04646
		1.75673	2.49952	1.38797	0.835707	1.51278
		1.68954	1.51186	1.66667	0.89276	1.10099
		0.779811	1.61134	0.458476	0.536712	1.32377
		1.85322	1.53137	1.38792	1.16509	1.02049
		1.89304	0.797265	1.90385	2.35862	1.07725
		1.49188	1.60361	0.793376	1.90562	0.946819
		1.72805	2.38544	0.980039	1.10308	1.90571
		1.51594	2.13811	1.76915	1.08543	1.28364
		1.74451	1.81915	0.614663	0.556088	1.18528
		1.15484	1.46222	0.920926	0.814647	1.71454
		1.75173	1.72448	0.707414	0.710039	1.1673
		1.34679	2.14043	1.50387	1.08352	1.12058
		1.12494	1.85599	0.677366	1.04245	1.30184
		1.40258	1.39824	1.71287	1.76494	1.52
		1.95997	2.20455	1.59262	1.80144	0.96061
		1.54612	1.29849	1.40657	0.664907	0.888049
		1.99603	2.08664	1.1508	1.10407	1.26803
		1.07543	2.90891	1.33488	0.997422	0.984572
		0.979524	1.74607	0.907458	1.31318	0.359056
		1.14873	1.29943	1.7271	0.892251	1.40723
		1.10572	1.57946	1.0617	0.799294	1.32926
		0.700251	2.24063	0.894948	2.1267	0.892807
		1.18414	1.87952	1.28747	2.04786	2.10094
		1.52436	1.90464	0.832745	1.62182	0.901005
		1.51246	2.61633	1.93091	0.794852	1.9933
		1.25738	1.49303	1.26823	0.776242	1.65224
		1.30966	2.09888	1.61336	0.814311	1.441
		0.890925	1.38308	2.5617	0.746605	1.01216
		1.32747	1.4444	2.15684	1.17506	1.82138
		1.65064	2.02552	2.06934	0.581414	1.30597
		1.21587	0.576629	1.37941	1.13144	1.0832
		1.36851	2.2221	1.20661	1.36092	1.2996
		0.768343	1.08348	1.20512	1.61319	1.3719
		1.29489	1.67477	0.584171	1.42292	1.72785
		0.922744	1.77194	1.43089	0.405512	1.60991
		1.61822	0.654904	0.840766	0.884932	1.47882
		1.37126	1.42504	1.62027	0.952548	0.9775
		1.23425	1.77068	0.971886	0.690502	1.18146
		1.04579	0.690021	1.11985	1.1519	2.28355
		0.918725	1.81202	1.12715	1.5184	0.927353
		1.33674	2.905	1.35559	1.13763	1.25528
		1.49428	0.963015	1.91133	1.24858	1.86457
		1.1249	1.80782	1.84099	1.9735	0.692283
		1.18918	0.359056	2.92398	1.62065	1.17694
		1.23466	0.598018	1.86924	0.92273	0.951394
		1.51791	2.91165	2.06068	1.65119	0.845095
		1.21235	2.27385	1.84755	0.777041	0.930648
		2.06051	3.70903	1.41972	1.11895	0.744741
		1.54151	1.80343	1.00843	1.38545	2.0158
		1.00013	1.63496	1.5321	1.12335	2.11922
		0.998218	1.73527	0.722924	2.51731	0.735212
		2.83836	2.11173	0.587617	1.04887	1.58493
		1.52588	1.47429	0.828932	1.64452	0.842779
		1.16586	1.60014	0.743133	1.14753	1.39652
		2.85971	2.09358	1.17807	1.91774	0.895697
		0.584171	1.56277	1.13482	0.405512	0.501713
		1.68774	2.38282	1.72316	1.47754	1.77089
		1.91715	1.98695	2.01988	0.593064	0.949888
		1.68818	1.84912	3.1649	0.843641	0.903559
		1.52453	1.87646	1.85753	0.937239	2.27474
		1.43445	1.87614	0.728707	1.38306	2.01673
		1.61028	2.49273	1.08481	1.09715	0.807207
		3.14327	1.6436	0.649907	1.12888	2.01443
		1.92335	1.28248	2.40109	0.894904	1.16193
		1.80253	2.58781	1.54795	1.06277	1.75538
		2.56429	3.4448	1.77965	1.7565	0.593064
		1.25898	0.792106	0.639096	2.29275	1.90778
		1.95488	1.99061	0.687564	1.01747	0.810399
		1.51438	1.50266	1.21371	1.75209	2.09763
		1.64573	1.08027	1.55792	0.6832	0.737425
		0.902809	2.39406	0.841602	0.923462	0.359056
		1.16858	2.09888	1.36647	1.66192	0.639778
		1.47091	3.33438	1.05373	1.21381	0.798746
		1.33175	0.971886	0.939615	1.52337	1.59811
		1.48371	1.76569	1.15317	1.23618	0.710445
		1.43761	0.94085	0.977237	0.632765	1.01301
		2.39222	1.5093	0.595236	1.14545	0.910245
		1.16029	1.58892	1.14756	1.5923	1.4298
		1.28379	1.1148	1.3702	1.41962	0.942408
		1.38137	1.1378	0.627687	1.10302	0.832721
		1.19366	2.75569	0.568396	1.02658	1.53358
		1.93744	2.27756	1.27854	1.43423	3.01435
		0.851398	1.53775	0.831941	1.03472	0.821372
		0.522311	1.71211	1.34324	1.56503	0.663584
		1.40218	2.2681	1.02101	1.1739	0.999834
		1.10745	1.51102	1.11805	1.10516	0.785024
		2.27496	1.39463	1.68482	1.20718	0.962017
		1.00136	1.18115	2.1672	2.11118	1.26376
		1.42911	3.43419	0.619549	0.723136	0.937875
		1.22162	1.62563	2.06721	1.77561	1.14734
		1.04208	2.16948	0.982928	1.0744	0.805453
		1.83119	2.45087	1.20894	1.5926	2.37458
		2.122	1.11489	0.359056	0.867687	1.45113
		1.35058	1.77886	0.726053	0.731001	0.833089
		1.34812	2.75588	1.73995	1.45884	1.03527
		1.06287	1.51396	0.4701	0.804253	1.18835
		1.40666	1.56604	0.94514	1.65824	1.39833
		2.0808	2.5052	1.27442	1.6295	0.725558
		1.04343	1.05242	1.17838	1.20098	1.92269
		1.1726	2.48777	0.78072	1.71185	2.02314
		1.61213	2.70274	1.63484	1.06838	1.47228
		0.883628	2.26036	1.67186	1.2495	1.18698
		0.627496	2.82983	1.23911	0.829401	1.07561
		1.75227	1.54169	1.89444	1.81255	0.558262
		1.46676	1.27585	0.807798	0.73995	1.9914
		0.958478	1.61612	0.929445	0.833982	0.689601
		2.05058	2.69774	1.59371	0.966058	1.00957
		1.01833	1.98049	0.661067	2.26838	1.51193
		0.85847	2.86969	0.746357	1.20143	1.01371
		1.89755	1.46515	1.29145	0.906214	0.973008
		1.24775	2.01936	1.64893	1.41139	0.908029
		1.14134	1.5024	0.792136	1.52466	1.19943
		1.93673	1.3337	0.882571	1.0812	1.863
		0.773079	1.75968	1.51849	1.43982	1.50656
		1.43951	1.6821	1.40094	0.757573	1.90772
		1.08872	2.31846	1.31213	1.40061	0.998084
		1.37728	2.19175	0.988379	0.772675	1.10862
		0.965304	1.41197	2.30845	1.221	1.1587
		1.48992	1.59924	1.04163	1.41543	1.30561
		1.8252	1.77258	1.0151	0.895532	1.41248
		1.15515	2.00964	1.5167	0.501938	1.09835
		1.36807	1.49835	1.0579	1.56986	1.23405
		2.35237	2.58018	0.897718	1.18599	0.943377
		1.0286	1.84151	1.15836	0.501938	0.887541
		1.44712	2.03161	0.762679	1.5169	1.35135
		0.990307	2.82802	1.89806	1.32118	0.686488
		2.21058	1.11751	2.20349	0.526617	0.698307
		0.750308	2.04089	1.15104	0.804714	1.96268
		2.20804	0.789396	1.59747	0.871883	1.26852
		0.905688	2.22392	1.32599	1.31656	0.950714
		2.25957	1.76177	2.39191	1.99893	0.623327
		1.26276	1.53415	1.47531	2.17076	1.52215
		1.49581	2.33335	1.04547	0.936632	1.19361
		1.49635	0.682225	2.09743	2.42448	0.955714
		1.65756	1.61383	1.23736	0.982606	0.697161
		1.07824	1.45776	0.876817	0.830207	0.748126
		0.957783	2.10857	0.987524	2.13906	1.2445
		0.965215	1.09289	0.664393	1.00305	0.957613
		1.68516	1.8351	1.2093	1.4084	0.540452
		1.86702	1.941	0.966704	1.10275	1.89983
		0.795601	1.88305	0.960636	1.57662	1.23644
		0.691105	1.78452	1.14257	1.67329	1.89893
		0.848209	1.32386	1.34334	1.80474	1.8201
		1.40148	1.40099	1.59097	1.63789	1.41924
		1.64474	1.74803	1.83419	0.752371	0.741855
		1.55683	0.833671	2.56808	1.65011	0.809618
		1.20044	1.07134	2.27345	1.12766	1.06355
		1.16243	1.1853	1.58275	0.556088	1.39212
		0.92954	2.39737	1.99116	0.754157	0.663584
		1.48992	1.26767	1.78826	1.50145	1.02088
		1.93349	1.23129	1.30187	2.07057	1.34744
		1.70018	1.11394	0.918328	1.97257	1.14307
		0.63945	1.39355	0.832462	1.21213	0.734905
		1.92589	1.23301	1.35078	1.13561	1.81018
		0.544261	1.6453	1.10998	1.47861	1.75029
		1.02147	1.61059	1.41394	1.17098	2.72741
		1.18901	1.40642	1.79452	1.30091	1.02101
		1.38783	1.20736	1.34259	1.81288	1.10912
		1.95708	0.762301	1.24696	1.96073	1.29533
		0.928811	2.17169	1.66226	0.608945	1.54541
		1.29027	2.22117	1.31747	0.853398	1.51747
		1.04918	2.94482	1.00212	0.489271	1.17228
		1.09739	1.12582	0.950016	1.26146	1.17363
		1.73241	1.57525	1.77987	0.770082	0.89592
		2.24403	1.69472	0.765736	1.27686	1.01436
		0.800197	0.983185	1.41483	0.796499	0.880756
		1.04478	1.08748	1.08752	2.03951	0.88629
		1.62698	1.46065	1.28869	1.14112	0.753451
		1.08758	1.55384	1.05002	1.02082	1.23382
		2.59956	1.67412	1.03452	1.59749	1.17928
		1.46536	2.39833	1.47665	0.622337	1.09486
		1.0438	2.26131	0.941714	0.758441	1.19722
		1.64205	2.54415	0.952461	1.50126	1.13102
		1.33629	2.24375	1.33763	1.51032	1.11724
		2.18765	1.744	1.21575	0.886971	1.25697
		1.56527	1.17287	0.958659	1.13794	2.32774
		0.954159	2.38066	1.39246	1.34042	1.08404
		0.778428	2.57093	1.67102	1.0074	1.3265
		2.07006	2.51954	0.789695	1.32448	0.731906
		1.40116	1.87182	0.359056	1.1216	0.760385
		1.02569	1.48261	1.19114	1.52508	1.00038
		1.85648	2.31202	2.97961	1.31236	2.15139
		2.06396	1.54922	1.25612	0.847105	0.959421
		1.10054	2.95907	1.03819	2.69706	0.744741
		1.01038	1.67731	1.50902	0.963831	1.37159
		1.95997	1.67649	2.18484	1.50666	1.51408
		1.43217	0.497318	1.5297	0.648403	1.12976
		2.7607	2.2085	0.873569	1.16454	1.10988
		1.83324	1.53519	1.85288	0.794576	1.38191
		1.02278	2.27227	0.827724	1.25121	1.0523
		1.79428	1.68528	0.912113	1.33841	1.38296
		1.85729	2.37448	0.861746	0.664546	1.63808
		1.63227	1.40305	1.96057	0.566287	0.861553
		2.08376	2.70097	2.55034	1.51909	0.634643
		1.16219	1.70307	1.77645	1.44854	2.20822
		0.620527	1.86058	3.31665	1.47567	0.6524
		1.06296	1.94188	0.810475	1.84081	1.20165
		0.653938	0.497318	1.16323	0.764926	2.07954
		1.47623	2.93231	0.95175	1.48247	1.18545
		1.3574	1.77239	1.25853	0.520027	0.950162
		1.42568	0.608945	1.43763	0.600547	2.03233
		1.37534	2.09531	1.74161	1.2359	0.595236
		1.92018	0.764582	0.847929	1.20935	1.0365
		1.12754	0.608945	1.03357	1.02295	2.16369
		1.71849	1.79185	1.20843	0.929797	1.11303
		1.81484	1.97239	0.71575	0.89922	1.16457
		0.713288	1.56903	1.2392	1.51417	1.71204
		1.28432	3.02067	1.03751	0.501938	0.707502
		1.56499	1.88372	0.874921	0.872136	1.37982
		1.45824	1.89699	0.979001	1.15284	1.31783
		1.09141	0.559364	1.22909	1.86046	1.87942
		1.02952	1.39007	1.25153	1.75537	1.49647
		1.11429	1.84173	1.17191	1.51625	1.1968
		0.723989	2.35241	0.945343	1.20479	1.24436
		1.52326	1.91829	1.04757	0.96325	0.603781
		0.920612	2.1048	1.57195	0.856136	0.939968
		1.17208	1.98371	0.635322	1.48714	1.53709
		0.63366	1.72019	1.97402	1.42212	0.821217
		1.84338	2.04299	1.99713	0.853058	1.57703
		0.802414	0.807945	1.62929	1.91465	0.780295
		0.691843	1.4498	1.2025	2.72438	1.43257
		2.28647	2.30064	1.28287	0.84211	2.01221
		2.41731	0.794066	1.71508	1.61727	0.559225
		1.35503	1.30874	1.87396	0.864399	1.3519
		1.66258	0.538538	1.36266	1.52877	1.03218
		0.941388	2.19113	1.51663	0.910896	1.06034
		1.46682	2.189	1.57466	1.18911	1.27479
		1.62367	2.16532	1.12234	1.21437	1.3296
		1.47196	2.07459	1.22046	1.03149	1.3381
		0.635322	2.11792	0.900038	1.89109	0.709409
		0.639778	1.59985	1.83136	0.8049	1.17266
		1.89011	0.693782	1.13032	0.769484	0.359056
		0.818936	1.50367	1.84286	2.19362	0.405512
		0.826246	2.65189	1.90247	1.37284	1.97324
		1.66842	1.57171	0.889479	1.56423	0.581414
		0.861746	0.576174	1.13184	1.47567	1.02341
		1.70957	0.559207	1.51889	1.80335	1.03734
		2.05497	1.52471	0.915234	1.49756	0.753323
		0.695488	2.1348	2.18504	3.97644	1.25685
		0.780936	2.16233	1.27326	0.71724	1.28408
		1.96491	2.3991	0.864385	0.4701	1.21496
		0.848209	0.489271	2.22916	1.62739	1.60892
		1.34331	1.7198	1.29651	0.742348	0.715375
		0.723691	1.91481	1.14844	0.980848	0.943654
		1.27534	2.57705	1.23369	1.22208	1.63328
		1.10333	1.7904	0.860064	1.08206	1.57455
		1.58331	0.997243	1.99161	1.19192	1.47364
		1.56512	1.08773	1.83062	1.45575	1.31614
		1.04254	1.36323	1.31325	1.08268	0.951722
		2.00064	2.37975	1.04633	1.33558	1.2339
		0.896687	2.58939	0.726656	1.56589	0.94791
		1.78832	1.40938	2.75701	1.73001	0.554457
		0.735095	0.9925	1.07601	0.773079	1.13563
		0.737307	1.80479	1.44505	1.62178	1.18206
		1.30631	2.06219	0.502535	0.848761	1.21327
		1.16844	1.63437	0.860053	1.2792	0.906379
		1.51281	1.33702	1.94197	0.839227	1.48438
		1.43281	2.57218	1.92549	0.976888	1.24968
		1.61354	1.04138	0.892797	2.83559	1.09469
		1.97355	1.24983	1.11604	0.713924	0.501331
		1.26734	3.31569	1.11009	0.730047	0.974704
		1.05822	2.26473	1.38681	0.842303	0.704777
		1.37701	1.18492	1.45278	0.704344	0.854217
		1.06693	1.42004	1.45029	1.37988	1.14026
		1.83211	1.61048	2.10366	0.63366	0.359056
		1.46568	2.0307	1.74095	0.792106	1.59094
		1.34393	1.36059	1.46972	1.06549	0.78182
		0.532181	1.33964	1.36639	0.850534	1.42292
		0.824263	1.20622	2.88286	0.565221	1.25193
		1.31268	2.14773	0.965895	1.24131	1.06881
		1.448	1.70992	1.43217	0.604408	0.893746
		1.20686	2.82452	1.19004	1.55724	1.24622
		1.36411	2.36467	1.11348	1.40996	1.7501
		1.37638	1.7152	1.78001	0.679099	1.45632
		0.766311	0.925966	2.19205	1.16863	1.0166
		0.838948	0.9128	0.585678	1.75312	1.80481
		1.28245	2.95711	0.845965	0.669707	1.1994
		1.38044	1.18752	1.9751	0.887583	1.76747
		2.4723	1.06396	0.71575	1.25317	1.58186
		1.37151	1.45857	1.24509	1.20785	1.02575
		1.65762	1.02404	1.0233	0.540452	1.26048
		0.780693	1.48644	0.83999	1.43419	0.963506
		0.888734	0.568396	1.96527	0.973599	1.43712
		0.359056	2.57928	1.42272	1.72728	1.1853
		1.36413	2.36205	1.26678	0.821664	1.19668
		0.983007	1.88723	0.987549	1.35858	1.20056
		1.65053	1.17795	1.31976	1.47253	1.67518
		0.562535	0.703187	0.768981	0.64643	1.6175
		1.02606	1.57775	1.23939	0.831874	1.54336
		1.56841	2.4555	1.7432	0.792106	1.11122
		1.32508	1.24167	0.359056	0.801666	2.22121
		2.00007	2.11371	1.79731	0.976471	1.09636
		2.09384	2.29595	1.78469	1.77465	1.30459
		0.97656	1.15341	0.924703	1.18292	1.46094
		2.83885	1.35769	0.980792	2.32868	1.65041
		0.692314	1.5322	2.23911	0.937246	2.07281
		1.73974	2.70748	1.19201	0.735884	0.596723
		1.14579	1.68497	1.03883	0.983478	0.676365
		1.23244	1.93054	1.80799	0.708649	0.773514
		1.83369	1.71468	1.51154	0.610138	2.73861
		1.83127	0.615111	0.405512	0.873569	0.858833
		1.17284	2.24712	1.54319	1.23885	1.20886
		1.36418	1.37649	1.02955	0.654231	0.805072
		1.53787	1.64207	1.68933	1.11591	1.35076
		1.69174	1.10664	1.16334	0.593064	1.52996
		1.71561	2.58814	1.76826	0.739265	1.09322
		1.86607	1.63939	0.978097	0.753597	1.08365
		0.411032	1.17212	1.35218	0.932748	0.556088
		2.59006	1.44675	2.01254	1.06549	0.828816
		1.26695	1.58347	0.935975	0.922569	1.32503
		0.972271	1.02248	1.08455	1.12963	0.795568
		1.5093	2.2176	1.30844	0.685789	2.63135
		0.666301	1.62797	0.789706	0.920849	1.04589
		1.14244	2.60731	0.748648	1.46165	1.72752
		1.95997	2.11118	1.7145	0.676365	0.733266
		1.60268	1.45032	0.919652	0.981822	0.645614
		1.01773	1.71732	1.33401	0.957325	0.900266
		2.02286	2.09531	0.7124	0.928073	1.76479
		0.960753	0.980624	0.850959	2.28654	0.715514
		1.25858	1.93979	0.832338	0.671684	1.01876
		1.19914	0.608945	2.58841	1.53981	0.864281
		1.28751	0.556088	0.834275	0.930939	2.2541
		1.6019	2.00842	3.05866	1.39418	1.1951
		1.41659	2.06343	1.23106	1.85381	1.02657
		2.5216	1.09112	0.885274	1.33926	0.832696
		1.2857	1.47706	1.25064	0.593064	0.579571
		1.25174	2.21915	0.860177	1.08878	0.934258
		0.89441	1.60557	1.23891	1.38672	1.10197
		1.41338	2.90823	1.16413	0.796421	0.981822
		1.34903	1.06651	2.43194	0.89276	1.50283
		0.858128	2.44182	1.216	1.4768	2.45825
		0.497318	1.70546	1.76378	2.13127	1.73695
		1.09294	1.16749	2.37496	0.847929	1.26904
		1.11836	1.92333	1.64885	0.795684	1.37866
		2.37495	2.15402	1.36015	1.33895	1.64541
		1.02635	1.98499	0.897739	1.66971	0.928039
		1.61814	2.12688	0.955062	1.0851	1.36578
		1.33177	2.44814	1.19954	1.88908	1.17978
		1.78211	2.1728	0.986041	2.4714	1.49994
		1.1094	1.27411	2.12589	1.27583	0.4701
		1.97312	3.0237	1.49357	1.5128	0.776654
		2.27606	2.19719	1.74668	1.09068	1.7737
		2.20834	1.91795	1.34151	1.32322	1.78583
		1.20986	2.02995	1.00034	0.832338	1.73712
		1.34862	2.04245	1.56043	1.23226	1.67732
		1.48964	0.901148	1.27655	1.3457	0.815919
		1.00904	1.21598	1.66006	0.675948	1.25116
		1.79997	1.76219	0.987708	1.08237	0.909802
		2.14438	2.17187	1.13231	1.86443	2.54713
		1.66041	1.17532	1.18446	0.948157	1.10512
		1.19078	2.00368	1.21508	0.405512	1.13687
		1.10908	1.74898	0.873177	2.07177	1.11323
		1.51888	2.21754	2.36646	0.536712	1.47926
		0.948898	1.65556	0.568396	0.405512	0.715394
		1.84694	2.0545	1.40111	0.607991	2.08083
		1.51007	1.01249	2.64856	1.12803	0.635322
		2.1999	2.99011	1.03775	1.91216	1.10021
		1.86463	1.37217	0.913804	0.827724	0.502535
		0.995645	1.81458	1.99705	1.19428	1.24039
		0.888272	1.4257	2.03131	1.32522	0.405512
		1.60292	1.84442	1.42898	2.75439	1.53095
		1.83965	1.11721	0.750189	1.31332	0.935253
		1.33328	1.07367	1.3446	1.9161	1.09455
		1.13047	1.3393	1.32331	1.03414	1.59928
		1.73473	1.80853	1.08553	0.956679	0.90473
		0.839078	1.33223	1.43451	1.32508	0.909955
		1.39784	4.47531	0.946753	1.19434	0.892257
		1.44134	1.57247	1.59993	1.28096	0.405512
		1.52952	1.81247	2.04172	1.01461	1.08326
		1.24626	1.43473	1.12073	1.30321	1.15837
		0.965997	2.5154	0.778285	0.716575	1.851
		1.0191	1.47404	1.00749	1.43305	0.607991
		1.51691	2.45718	1.14983	1.35795	0.698937
		0.963015	1.18788	0.993328	0.451534	1.94609
		0.734898	3.38643	1.66648	0.653127	0.627505
		1.39732	2.49066	2.21693	1.33093	0.809132
		0.915295	0.811555	1.01507	0.556088	1.21941
		0.88004	1.37707	1.37905	0.630682	1.51937
		2.4036	1.31482	0.82609	0.621972	1.1839
		1.84249	2.20289	0.973451	0.405512	0.683609
		1.35301	1.3129	1.11019	0.682465	0.568058
		1.37549	1.23507	1.00147	1.08695	0.886575
		1.23176	1.32229	1.519	1.55667	0.542986
		0.878977	1.21044	1.02866	1.0723	0.993332
		1.77632	1.40674	1.92185	0.681059	0.884595
		1.6595	2.30055	1.10171	1.25619	2.67838
		0.599332	3.06087	0.922817	0.632765	0.750222
		0.903785	1.55632	0.818393	0.936305	0.78076
		1.59303	1.09048	0.815158	1.67591	1.59351
		1.19069	2.17972	1.10784	0.63366	1.52398
		1.19639	1.14725	1.14002	1.1929	0.839394
		0.982426	3.39489	1.61503	0.809181	0.825626
		0.501331	2.81837	1.00513	0.968928	1.78347
		0.6351	1.38074	2.15985	1.74697	0.757795
		1.10831	3.1894	1.43097	0.919652	1.042
		1.38076	1.61034	1.94884	1.35527	1.36543
		0.980421	2.3152	1.12021	1.15243	1.20909
		1.31694	1.04431	1.13619	1.50969	0.639778
		0.987623	1.36119	1.80784	0.977875	0.794672
		1.93553	2.47012	1.18568	1.37468	0.875576
		2.21696	1.87573	1.27521	0.954625	1.02871
		1.09946	1.51936	1.0786	0.501938	0.745558
		0.677366	0.612906	1.23644	1.01796	1.10508
		1.73916	1.96857	1.53685	0.861006	1.21437
		0.989885	1.94101	2.58035	0.405512	0.846698
		2.94206	3.71922	1.14887	0.934458	1.03286
		1.67631	2.98616	1.06956	1.28362	0.654231
		0.965475	1.88923	1.61598	1.6748	1.14582
		2.07425	2.26514	1.39186	0.587617	1.24145
		1.08665	0.605813	0.964044	0.733039	0.765362
		1.70526	1.96544	1.57771	1.4184	1.3215
		1.291	1.99115	1.23936	0.798454	0.990517
		1.29917	3.34677	1.04656	1.12591	1.46217
		1.84925	0.666099	1.39426	0.910786	0.669195
		0.875228	0.710445	1.24582	0.775453	1.11928
		1.57475	1.28588	0.66452	2.14747	1.01512
		1.98623	1.20238	0.91428	1.26846	0.501938
		0.989462	1.95705	1.29862	0.789028	2.17745
		1.59372	0.4701	1.09188	0.654231	0.529313
		1.12924	0.550871	1.43981	1.03751	0.833382
		1.09837	1.33729	1.5818	1.00207	0.860279
		1.61682	2.23255	0.773072	0.739485	1.93724
		1.24087	1.41633	1.16672	1.08406	0.405512
		1.44521	1.39568	1.52718	0.789892	0.998218
		1.60307	1.72629	0.932912	1.39361	0.842666
		1.06404	0.491071	0.962204	0.990517	0.890515
		2.0225	1.27814	1.97937	1.06829	2.38974
		1.88719	3.05875	3.25169	0.84977	1.09565
		1.03483	0.458476	1.88401	0.910898	1.29593
		2.18989	2.37659	0.978354	1.92615	1.40884
		1.20051	0.4701	0.621294	1.28545	1.03621
		1.56629	1.21436	0.359056		1.21612
		1.15288	2.89009	1.18174		0.802888
		1.71853	1.71943	0.908181		0.805323
		2.00751	1.95805	1.28085		0.824263
		1.76249	3.47033	1.04058		1.72897
		0.713924	2.01108	0.800721		1.50519
		1.92049	2.31411	1.97443		1.74616
		1.95953	1.39365	1.22251		1.13973
		0.738709	1.74656	1.86712		0.64124
		1.34488	1.87563	1.2871		1.05426
		1.26591	2.56537	2.26971		0.581176
		1.22384	1.96393	0.585778		1.16149
		1.2417	2.74513	0.768268		1.00478
		2.01468	1.87492	2.64902		1.77778
		2.09306	1.58985	2.2152		1.67975
		1.90139	2.74738	2.02092		0.723491
		1.64279	1.12517	1.96074		2.0605
		1.67635	1.88288	1.55794		1.0434
		1.28658	1.14425	2.09305		0.405512
		2.10341	1.66183	0.48256		1.01295
		1.85845	1.66246	1.39119		0.858128
		0.979524	1.80042	1.28173		1.26843
		1.33309	0.933174	1.9307		1.26464
		1.072	2.47421	1.47627		0.713556
		1.28469	1.89841	1.49149		1.0714
		1.12373	1.56452	1.94933		1.44251
		1.80461	1.67928	1.16563		1.58657
		1.94563	3.45892	1.34947		1.11845
		2.06076	1.54778	1.46767		0.744956
		1.08385	1.51985	1.39969		1.77136
		2.22274	1.52403	2.10626		1.40157
		2.50082	2.35277	1.34636		1.38138
		1.16288	2.27416	1.78647		0.57506
		1.04362	1.46182	1.03921		1.16924
		1.39348	2.06073	1.26021		2.24903
		1.08612	1.94641	1.18716		0.688753
		0.838124	0.411032	1.18691		1.48213
		1.92892	2.01203	2.32903		2.30875
		1.13144	2.0379	1.49884		1.29858
		2.0225	2.35704	0.945233		1.33162
		0.853325	1.41319	1.75621		1.4116
		1.53564	1.35833	1.70962		1.60226
		2.13931	1.17185	2.14402		2.10994
		1.12173	2.24308	2.01026		1.20084
		1.24764	2.12691	1.03434		1.15739
		1.72245	0.443609	2.33066		0.709195
		1.13035	1.93425	1.18534		0.900779
		1.26012	1.99885	1.12766		1.16659
		1.2031	2.30362	1.60686		1.69328
		1.63812	1.70079	1.11318		0.777809
		1.07295	1.4438	1.00726		0.585678
		0.938266	1.36587	1.08612		1.07827
		1.60052	1.79544	0.942336		1.00431
		2.02242	2.64826	1.18732		1.99573
		1.01806	1.89956	0.975966		1.21177
		1.37247	1.35211	1.27035		1.17008
		1.01201	1.96697	1.3302		0.701114
		1.0747	1.69863	2.3031		0.69102
		1.47069	1.2298	1.09794		1.58705
		1.58671	1.85657	2.6276		1.48832
		1.65119	1.47465	1.20313		1.62105
		1.39741	2.22258	1.4719		1.08394
		1.55188	1.84217	1.1858		1.5036
		0.893552	1.50767	1.83369		1.21515
		1.5705	1.01283	1.67624		1.34673
		0.411032	2.09313	1.33793		0.758353
		1.07259	1.45044	1.21226		0.566287
		0.987549	2.39904	1.88796		0.89537
		1.66201	1.16726	0.906413		1.42974
		1.37269	1.73265	1.12551		1.02115
		1.24934	1.49479	1.41273		0.405512
		0.959723	2.07738	0.967456		1.89923
		1.28984	0.761845	0.918013		1.33201
		1.92538	2.21695	0.856205		1.54449
		1.96944	2.46404	0.94459		1.39059
		1.45868	2.19607	0.995388		1.21864
		1.28733	2.67999	1.35492		0.835746
		1.43013	1.85424	1.07678		1.34567
		1.09319	1.09221	1.11323		0.621972
		1.24014	1.78174	1.16769		1.14049
		1.24941	1.92679	1.11368		1.06393
		1.92399	1.53833	1.75128		2.40362
		1.37066	0.973793	0.581414		1.04006
		1.24803	1.40623	1.99324		1.10704
		1.77937	2.67179	1.14427		1.04161
		1.15347	1.85655	1.48055		1.13512
		1.42976	1.92324	0.916682		0.997174
		0.899735	1.60249	0.935075		1.95339
		1.15146	1.54421	0.956791		0.802414
		0.812422	1.1946	1.34587		2.86113
		1.30939	0.840741	1.65359		0.826023
		1.57188	1.327	0.716897		1.17684
		1.08857	1.71317	1.07595		0.726519
		0.657588	3.1966	0.766079		0.870831
		1.03659	2.16725	0.721496		1.46519
		2.52902	2.08974	1.25664		1.26178
		1.29849	1.65394	2.0291		1.7706
		1.72157	2.7252	1.28359		1.2109
		1.94542	1.67293	1.01441		0.405512
		1.7023	1.86043	0.765703		1.46944
		1.18976	1.01446	1.37185		0.883609
		1.6692	3.05249	1.10831		0.927644
		1.57011	1.17602	1.27832		0.82226
		1.66319	2.20326	0.805126		0.4701
		1.65756	3.20391	2.07301		1.43556
		2.03707	2.70115	1.14579		0.844783
		1.24179	2.36891	1.81207		1.98543
		1.39833	1.71684	1.45829		1.23507
		2.37013	2.03271	1.2762		1.62678
		1.47229	1.69666	1.76534		0.888624
		1.02187	1.78715	1.56917		1.65716
		1.25735	1.00929	1.09134		1.56527
		1.44348	1.84631	1.54647		1.06183
		1.12138	3.73678	0.858128		1.54696
		1.3995	0.921795	0.725972		1.70072
		1.31894	1.88467	0.779783		1.12235
		2.68195	0.930171	0.733084		0.769372
		1.44477	3.24859	1.15933		1.45128
		1.02582	0.921175	2.00566		1.18296
		1.47557	2.27102	2.01483		0.969832
		2.53261	0.685702	1.50145		0.700085
		0.84852	1.02895	1.56278		1.03186
		0.914178	1.61881	1.84375		1.12043
		1.55214	1.64603	1.08308		1.18165
		1.91093	0.604115	0.835746		1.19129
		1.87606	0.529698	0.894948		0.608945
		0.987267	1.20948	1.97102		1.30734
		1.52563	1.5327	2.10369		1.31698
		1.52499	2.67429	0.84539		1.13092
		1.45027	1.8456	2.61622		1.10938
		1.38234	0.817404	1.41592		1.45823
		1.86942	1.68641	1.47956		1.6066
		2.76051	2.03323	1.26221		1.08439
		0.947068	0.987648	1.08068		1.35309
		1.37001	1.24367	1.19992		0.748876
		1.51085	2.08409	1.59821		1.38081
		1.00696	2.12433	1.92636		0.542986
		1.64615	1.87821	0.740855		0.943788
		1.84702	1.61404	0.693722		0.716575
		1.9563	1.86505	2.64927		0.714629
		1.53366	1.773	1.25532		1.04377
		1.01564	1.64651	1.50856		1.59115
		1.85763	1.92961	1.20205		0.535262
		1.42503	1.51587	1.36099		1.44758
		1.4609	2.48048	1.98398		1.02939
		1.18331	1.78247	1.01953		0.983776
		2.37541	1.6096	1.47025		1.59599
		1.54302	1.69361	2.23097		1.91558
		1.89366	2.51314	1.98897		1.27831
		1.48562	1.94393	1.19881		0.501938
		1.05414	1.65408	1.11323		1.19954
		1.17464	1.97475	1.04888		1.25975
		1.27526	1.46664	1.98801		1.26832
		0.916704	1.3345	1.21223		1.76072
		1.84509	0.550703	1.43353		0.884398
		1.0151	1.99531	1.44918		1.02074
		0.769573	1.72922	1.61643		1.23052
		2.28957	1.95581	1.06781		1.08705
		1.29417	1.64683	1.43606		1.16255
		2.02107	1.86658	1.07357		1.05338
		0.983194	1.48187	2.61707		0.73995
		1.47713	2.69086	1.35794		1.0827
		0.958638	3.33736	1.34453		1.07352
		0.982909	0.405512	1.4048		1.59072
		2.27557	0.443609	2.79077		1.15316
		1.37719	2.86808	1.84667		1.10503
		1.36417	4.00081	1.35676		1.13266
		0.865616	1.84194	1.11536		1.0312
		0.851424	1.71699	1.54692		0.77739
		1.10443	1.17866	0.648496		0.637012
		1.37122	2.06157	2.38635		1.32756
		0.65689	0.994234	2.33201		0.955895
		1.40716	1.04786	1.08357		1.28239
		1.13757	2.07943	0.662555		1.68205
		1.06034	1.52184	1.46926		1.08348
		1.98428	1.58983	2.56761		1.97348
		0.851589	1.95475	1.34747		1.0462
		1.90265	0.583974	0.88147		1.05441
		0.920018	2.98665	0.985791		0.85393
		1.7983	1.54805	1.94924		1.25897
		1.11335	0.359056	1.59018		1.04622
		1.14179	1.64786	2.42089		0.764093
		1.2491	1.12092	1.45585		1.06601
		1.29417	2.39271	1.5526		2.63427
		1.68422	2.18842	1.61936		0.899642
		1.02807	2.60514	2.16931		0.891818
		1.1856	1.13997	1.18326		1.12355
		1.2809	0.48256	2.87656		1.50925
		1.46621	2.36181	1.30047		0.889468
		1.23936	2.16793	0.977688		1.1146
		1.23664	2.39197	1.55282		0.837492
		0.98235	1.73035	2.04687		1.70542
		1.04719	2.79173	2.00762		0.905635
		0.839264	1.64983	1.74458		1.58872
		1.07148	1.6196	1.49984		0.91325
		1.77778	2.39389	1.06921		1.7327
		2.1478	2.66585	2.96312		2.1374
		1.28654	1.94465	1.22906		1.18175
		0.983676	1.27862	1.62126		1.13642
		1.13878	0.734512	1.18095		0.695414
		1.54827	1.64979	1.76523		0.690021
		0.61543	2.87677	1.24114		0.965174
		1.00853	1.60014	3.68324		1.41347
		1.85341	2.89539	1.14627		0.948871
		1.20768	1.46943	1.63455		0.749282
		1.52111	1.94105	3.16507		0.74384
		0.7752	2.11717	1.90561		1.4155
		0.593064	0.817545	1.75891		0.934097
		0.876404	1.60878	1.20422		0.628863
		1.00127	2.35155	1.1273		0.701603
		1.26899	1.68433	1.28173		0.696482
		0.756915	1.44356	1.53114		0.741099
		1.75372	1.89113	1.14858		1.99394
		2.0225	2.99189	2.10377		0.629377
		1.52785	2.62833	1.64478		1.2714
		2.6809	1.22	2.38992		0.405512
		2.01938	1.61209	1.64066		0.540452
		1.85839	2.12537	1.43508		1.41579
		1.7734	2.03103	2.828		0.543323
		1.54069	1.37401	2.00891		1.02286
		1.48283	0.911315	1.22975		1.09864
		2.49418	3.5657	3.14133		0.891519
		1.85383	2.00199	0.71951		1.07144
		1.42335	1.44953	1.18217		0.359056
		1.88506	1.28131	2.2476		1.50643
		1.18473	1.9266	1.57597		0.593064
		2.14486	1.46532	1.32912		0.916447
		1.33856	1.92028	0.7804		1.81227
		1.10589	1.38186	1.20554		1.75855
		1.51629	1.65068	1.55928		1.31204
		1.43663	2.21196	1.70525		0.776243
		1.09095	1.25363	1.29072		0.63548
		0.972428	1.21373	1.30775		1.69696
		0.887917	1.48553	1.2002		1.46158
		0.971172	2.21995	1.51123		1.42899
		0.556088	1.53931	0.875665		1.63198
		1.83822	2.12593	1.48223		1.13221
		1.1853	1.97958	1.92466		1.23658
		1.19644	2.29663	1.22128		1.2415
		1.37106	1.4309	1.56713		0.765092
		1.04547	1.25697	1.99172		0.995802
		2.04623	1.96729	1.06072		0.953658
		1.58812	1.96149	1.49172		1.95889
		1.11697	1.59595	1.37936		1.37178
		2.83232	1.79209	1.26709		1.14219
		2.26941	1.73715	1.37943		0.712528
		1.27712	1.47804	2.1233		1.85352
		1.41881	1.81466	2.21938		1.6865
		1.08098	1.55637	1.06188		2.61302
		1.13649	2.86793	1.56628		0.861006
		2.01903	0.607314	0.97838		2.17112
		1.90661	1.0964	2.27672		1.24848
		1.04717	1.55643	1.75957		0.96438
		0.852975	1.11014	1.85691		0.925788
		1.25291	0.700251	1.85553		1.19784
		0.556088	1.95995	1.57779		0.856971
		0.981138	1.73278	2.96631		0.727637
		1.30303	3.0006	1.82766		1.26519
		0.741663	1.98723	1.83959		1.20991
		2.21575	2.16252	3.31088		1.32448
		1.33565	2.62459	2.05193		1.93141
		1.11107	1.95935	2.17802		1.38762
		1.09164	1.59655	2.01965		1.088
		1.15888	1.45414	1.97463		0.94648
		1.42236	2.13503	1.40292		2.05897
		0.61964	2.0414	0.501713		1.53922
		1.00246	1.33939	1.49632		1.50653
		0.675948	0.766813	0.916538		1.1497
		1.50535	1.62316	1.95675		0.881619
		1.62235	0.501938	1.0656		1.06046
		1.04427	2.28454	1.47502		1.14306
		1.79997	1.81048	1.59603		0.723
		1.15101	1.63477	1.57481		2.20102
		1.03066	1.60027	0.973236		1.57045
		1.10911	1.94016	1.92929		0.97899
		1.10173	0.359056	1.90951		1.47365
		1.39052	2.83377	2.14444		1.25551
		0.950884	2.37417	0.710322		0.451534
		0.829653	3.20012	1.96927		0.405512
		1.99323	1.71624	1.47833		2.45775
		0.711647	1.17802	2.15805		1.30067
		0.975424	3.26505	1.39911		0.608945
		1.08858	0.62089	1.4582		0.955224
		1.6187	2.30666	2.81074		2.18742
		1.08731	2.06678	1.5325		0.48256
		1.95873	2.14718	0.677366		0.497318
		1.91868	0.582021	2.13416		1.01004
		1.4578	2.56763	1.61374		1.63621
		0.837893	1.84941	0.914258		2.43671
		1.18881	2.30328	1.69343		1.03641
		1.46687	2.38386	0.694913		2.10206
		1.0578	1.50094	0.983805		1.24632
		1.68232	1.95543	0.848844		0.661883
		1.24103	0.532084	2.88989		0.83975
		1.01711	0.76249	1.90303		1.35994
		0.727581	1.74771	1.06914		1.54483
		1.57793	2.86582	0.963281		0.712904
		1.66772	1.70895	1.90108		1.00832
		0.639096	2.08433	0.988744		0.975519
		1.00868	1.46143	1.33821		0.773079
		1.17735	1.78564	2.07367		1.49386
		1.04445	1.90681	1.90855		1.78341
		2.16756	0.904279	1.83751		0.672276
		2.01139	0.965425	1.77281		1.1394
		1.3488	0.597314	1.24833		1.0433
		0.777827	3.95822	1.63984		0.620664
		1.32976	1.37818	1.80788		1.45015
		0.958702	1.75332	2.54647		0.69102
		2.44494	1.43763	2.03254		1.50227
		1.98304	0.740541	2.14014		1.31096
		1.74256	2.63366	2.00176		1.11477
		1.32834	3.21031	1.78746		1.55631
		1.81132	1.75834	1.6572		0.600072
		0.838776	2.0325	1.49127		1.0228
		1.92057	0.700251	1.64583		0.921717
		0.629185	1.81569	1.94213		0.847468
		1.45058	1.59216	2.24042		2.09354
		1.00466	2.28681	2.29941		1.70398
		1.12322	1.57704	2.31141		0.820606
		1.41815	2.02267	1.35511		1.4899
		0.991709	1.61216	1.13146		1.27982
		0.954025	0.359056	1.24054		1.46089
		0.776746	1.64355	2.0339		1.07544
		1.52155	1.16407	2.27404		1.04686
		1.51564	0.405512	2.84137		1.75591
		0.603387	1.6157	1.72698		1.46882
		0.61	2.70955	1.1458		1.10854
		1.1362	2.48626	0.989225		1.10976
		1.77903	1.60279	2.40173		2.01075
		1.75396	1.49663	2.91716		1.43475
		1.70551	2.77985	1.55235		1.4037
		0.917148	1.19137	2.05355		1.3162
		1.89221	1.6518	1.42391		0.964974
		1.43448	1.18763	2.52678		0.913149
		1.88891	2.58	1.67598		1.30061
		0.774509	1.84897	1.43728		0.921654
		1.04579	1.24853	1.66866		0.713924
		1.36072	2.13192	1.35965		1.56254
		0.501938	0.501713	2.70991		1.2327
		1.44673	0.91674	1.42775		1.02741
		1.68631	2.35641	1.62156		0.984443
		0.896835	0.588612	1.89526		1.86929
		2.05384	1.69811	1.57877		1.02534
		1.04715	2.97533	0.792494		1.34004
		1.65984	1.86572	1.6609		1.76703
		2.06975	1.76441	1.47175		1.39931
		2.28897	2.6508	1.12281		0.721889
		1.36317	1.48874	1.78626		0.708649
		1.01373	1.84301	1.50579		1.44049
		1.55059	3.01804	2.74823		0.828778
		1.68857	1.23757	1.1916		0.64643
		1.24972	1.48741	2.53469		1.98524
		1.86208	0.536712	1.4033		1.54217
		1.88594	2.25434	1.86703		0.669859
		2.16206	1.60899	1.81624		1.37594
		2.50434	2.02483	1.59929		0.855334
		1.02849	2.06871	1.44262		1.23331
		1.6345	0.957084	1.80818		2.20988
		0.724723	0.828778	1.58734		0.536712
		1.3712	2.23572	1.39134		0.536712
		1.09484	2.39335	1.36789		1.55964
		1.88889	1.49444	1.61391		1.64029
		1.96355	2.5143	1.83416		0.881402
		1.69513	1.30794	1.12339		1.56674
		1.77018	0.782088	1.0691		0.748648
		1.85849	2.33628	1.29884		0.589633
		1.36412	0.753228	1.26834		1.0048
		1.26079	1.33238	1.96099		1.17226
		1.53277	1.7257	1.38168		1.4418
		1.66334	2.72309	1.91196		0.722938
		1.39373	0.701603	0.967453		1.28077
		1.40854	1.18579	0.926536		0.787981
		1.53965	1.69469	1.75711		1.15094
		1.81207	1.49615	0.843087		0.736935
		1.35132	2.43228	1.8951		1.58989
		1.0233	2.99218	0.939909		1.11382
		1.16033	1.73699	1.87928		1.08155
		0.950326	2.1764	0.863837		1.53775
		1.44988	0.871857	1.33894		1.79789
		1.19386	0.639096	0.752397		1.35346
		0.969292	1.45477	1.83375		0.791204
		1.43369	1.90577	1.72683		0.787692
		1.70243	2.12168	1.10401		0.89003
		1.52109	0.947685	2.17887		1.81276
		0.864281	1.26863	1.31036		0.532084
		0.797839	3.54712	2.18527		0.976565
		1.43217	1.95319	1.45271		0.556088
		0.856384	3.27624	1.55232		1.48394
		1.04772	2.21437	1.85983		1.06174
		1.96467	1.33412	1.64763		0.763353
		1.03659	1.46686	1.78344		0.78611
		0.795121	1.13873	1.53523		0.73907
		0.884595	2.74439	0.987634		0.78176
		1.06167	1.85586	1.57257		1.26563
		1.99934	2.3265	1.27735		0.711492
		1.21003	1.51684	1.72288		0.814311
		0.733237	0.359056	1.53668		0.68334
		1.06329	1.87046	2.22676		1.44214
		1.24043	1.49208	2.48275		2.17716
		1.62412	1.2735	2.29823		0.846955
		2.01464	0.868102	1.9507		1.2715
		1.44191	1.06979	2.41082		1.2725
		1.53211	1.71769	2.2479		0.812019
		1.48903	0.451534	0.556088		1.62855
		1.40646	2.69011	2.6429		1.04151
		2.21658	2.25162	1.82856		1.83006
		2.1282	2.52566	1.65739		0.685789
		1.41741	1.30742	1.58314		1.14108
		1.85735	1.43928	1.38144		1.07003
		1.42245	2.83251	1.59767		0.921202
		1.4945	2.89141	1.8179		0.877199
		1.04018	2.92788	0.852975		1.10817
		1.20099	2.28279	1.32877		1.06037
		0.98016	1.34007	2.72483		1.2484
		0.994441	1.31075	1.35067		0.803714
		1.82964	1.19144	1.19955		1.79217
		2.01783	1.2746	1.77115		1.42328
		1.34536	1.21134	1.2814		1.26496
		1.77887	1.06517	1.7449		0.98289
		1.58713	0.995151	1.657		0.837841
		1.29661	2.45313	2.17184		0.942665
		1.57739	1.90034	1.5806		0.835634
		1.30594	1.47272	2.55521		0.686115
		2.15449	2.54872	1.4404		0.764664
		0.782174	2.05676	1.36918		0.443609
		1.27888	2.57361	1.33494		1.35686
		1.1359	1.70338	1.61978		1.29853
		0.857595	1.60763	1.01773		0.568396
		2.40996	1.76778	1.52123		0.778727
		1.32423	2.77312	1.81202		1.23962
		2.30966	2.39912	2.48756		1.09339
		1.59377	2.74851	1.56164		2.28349
		1.83225	1.21533	2.47715		0.924609
		2.27541	2.37035	1.59498		0.90694
		1.34259	1.43222	1.14811		1.57622
		1.10501	1.78583	1.46		0.860279
		1.8321	0.993648	1.56002		1.27777
		0.76706	2.38586	1.3474		0.831789
		1.80604	2.58218	1.45814		1.44595
		1.75163	0.750556	1.60282		0.83008
		1.24645	2.6347	2.39697		2.36069
		0.878678	2.26695	1.56814		1.88658
		1.90416	1.07976	2.71236		0.710939
		1.04626	1.31717	3.02093		1.81048
		0.91454	0.411032	1.67486		1.10468
		1.91978	2.98076	0.834517		1.44551
		1.53177	2.59771	1.63292		0.542986
		1.36477	2.23864	1.7334		1.10262
		2.01118	2.70455	1.4286		0.812586
		1.76334	1.71083	1.03219		0.627496
		2.01221	1.56518	1.42604		0.359056
		1.78326	1.22964	1.69085		1.29364
		1.29442	2.51392	2.88663		0.593064
		0.983596	0.842303	1.88793		2.33426
		1.36893	3.18657	2.81217		0.937098
		1.70855	1.51629	1.15534		0.664907
		1.0469	2.72864	1.33547		1.44149
		1.7637	1.59812	1.29072		0.48256
		0.971011	1.57982	0.891883		1.44114
		0.94484	0.691719	2.1225		0.845925
		1.99531	1.71252	1.91226		0.629185
		1.00937	3.87188	2.05492		1.26793
		1.29704	0.874825	1.06034		1.55966
		1.36069	2.42833	1.53388		1.37741
		0.989545	2.73603	1.34373		1.28048
		1.65731	0.790542	1.25175		0.687538
		2.15368	3.31731	2.22053		1.21858
		1.76711	2.2377	1.46724		1.48483
		1.16497	2.54628	1.95722		1.04034
		1.55554	1.64895	1.43856		0.944406
		0.893304	1.61296	1.30252		1.31041
		1.7029	0.54899	1.6173		1.04354
		1.89548	0.359056	1.86339		0.924631
		1.69854	1.93102	1.02232		1.42762
		1.33527	2.82219	1.42228		1.38384
		1.29674	1.29832	2.12455		0.972717
		1.47368	1.84744	1.68181		0.70895
		2.30019	1.67124	2.50101		0.834517
		1.25579	3.04773	2.13735		0.685347
		0.958985	1.46746	1.24954		0.501331
		1.63276	1.45429	2.02426		0.790725
		1.58266	2.40411	2.76537		1.11366
		0.899642	0.522311	1.56171		0.907548
		1.54677	1.30296	2.2029		1.03191
		1.26731	1.25096	2.36118		1.08207
		1.36503	1.15104	2.64936		1.06826
		1.93068	1.3628	1.98336		1.23855
		0.882317	1.77304	1.46687		1.20515
		1.16933	2.00829	1.41272		1.75295
		1.23861	2.83986	1.63881		1.30628
		1.40305	2.87495	1.6768		1.39993
		1.48908	1.14089	0.888613		1.39916
		1.79562	2.98078	1.55833		0.772487
		1.23723	1.36147	1.73173		1.2088
		0.905056	1.66773	1.43481		0.880401
		2.12486	1.22184	2.20173		1.06167
		1.08464	2.8211	1.96558		1.74362
		1.50071	2.06443	1.94564		0.990714
		1.12083	1.11045	2.14772		1.57388
		1.34259	2.03966	1.26429		0.359056
		1.16707	2.2179	1.08716		1.39132
		2.17131	1.09046	1.22626		0.836455
		0.683671	0.667133	1.46378		0.897587
		1.34259	2.08657	2.00364		0.740855
		1.63601	1.91373	1.07207		0.881781
		0.501331	0.970527	1.09855		1.17103
		1.40181	1.79738	1.49828		0.497318
		1.66552	1.2139	0.65761		0.634643
		0.994361	1.19644	1.12277		0.769573
		1.86802	2.39505	1.8709		1.05225
		1.80836	2.25897	1.99851		1.56016
		1.38	0.732976	1.24732		1.26647
		1.87004	2.16327	1.62362		1.98424
		1.46611	1.48459	0.836845		1.81143
		1.14914	2.36898	1.85252		1.53754
		1.2386	1.34632	2.08471		0.935389
		0.922433	2.8172	1.26991		0.82226
		1.04715	2.03699	1.91816		1.79669
		1.61641	1.77601	2.32378		1.24171
		1.1278	1.26425	2.17988		1.09373
		1.05716	2.17943	2.08152		0.826593
		1.13232	0.359056	1.30659		0.938849
		1.11591	2.84996	0.877831		1.43247
		1.10911	1.37396	2.04114		0.720473
		0.911292	1.39544	2.35664		0.924631
		1.46276	1.49697	1.31022		0.812568
		2.9853	1.92438	1.84627		0.883132
		1.27024	1.05655	1.65765		0.938849
		2.33231	2.58513	1.60544		1.25284
		1.27205	2.02215	2.15229		0.451534
		2.00284	0.906104	1.06329		0.945528
		1.54772	2.04631	1.58086		1.05882
		1.5448	2.24839	1.8745		2.15392
		1.42114	2.8126	1.77983		1.38429
		1.46845	1.76647	1.32957		0.709307
		1.72889	1.48341	1.86524		1.09601
		2.27428	0.550703	3.19647		0.714155
		1.27328	1.26079	1.65756		1.35597
		1.192	1.29558	1.8075		1.13302
		1.149	2.10134	0.829775		1.57649
		1.49884	3.57803	2.0455		0.792169
		1.04512	1.50737	2.84938		0.522311
		1.55002	1.54859	2.11436		1.08319
		1.28732	2.58311	0.948896		1.41598
		2.00084	2.61981	1.30621		1.70055
		1.11612	1.81539	0.62089		0.786886
		2.22642	1.20583	1.30577		1.12173
		1.26074	1.85709	1.80558		0.405512
		1.6351	1.512	2.12266		1.22657
		2.09317	1.53302	2.05701		0.710039
		1.46085	1.29989	3.1154		1.80874
		0.955868	2.97698	2.58859		0.958214
		0.8315	0.955697	0.95652		1.3974
		1.37982	0.679436	1.60533		1.17938
		0.945233	2.6187	1.86862		1.20629
		1.03911	2.01755	1.40982		0.877846
		1.62607	2.17604	0.872382		0.992796
		0.900218	3.32024	1.14884		2.82091
		1.94782	1.61355	0.986085		1.25116
		2.04242	1.4649	1.67346		1.19975
		2.06585	2.82917	1.46166		0.760385
		1.6408	1.45344	1.559		0.815767
		1.35281	3.1875	0.932351		1.07896
		1.81323	2.12022	1.07274		0.983034
		1.53212	1.76119	0.684453		0.753323
		1.35038	1.75536	0.912484		0.763135
		1.47068	1.91168	1.46725		0.865701
		2.16034	1.39281	1.78478		1.06804
		1.1233	2.52258	2.11312		1.31585
		1.18033	1.78679	1.34517		0.83749
		1.43492	1.95296	1.53779		0.943359
		1.46687	1.29168	1.47523		0.605544
		0.703601	2.02361	2.1869		0.497318
		1.18613	1.67978	0.874921		1.0037
		1.47063	2.30659	1.25794		1.53913
		1.24871	1.36525	0.816717		0.863894
		1.07254	1.86861	1.05876		1.05355
		1.61097	1.51223	2.54083		1.06904
		0.901467	1.95079	1.86154		1.65545
		0.76257	1.98686	2.28583		0.644285
		2.12128	1.66244	2.02596		1.16306
		2.6094	2.15734	1.64165		0.886716
		1.17202	2.0245	0.809373		1.72692
		0.707481	2.81706	1.05218		1.26754
		1.85746	2.6092	1.08559		1.10286
		1.0434	0.963688	1.50814		0.85847
		1.40674	1.74317	2.10087		1.89964
		1.02942	0.580038	1.2735		0.97845
		1.01622	1.91881	0.748648		1.42902
		1.73802	1.41605	1.29711		1.53518
		0.860529	3.09661	2.85569		1.01677
		0.747136	1.64829	2.07347		0.90321
		0.78076	2.68468	1.85624		0.735095
		1.15996	1.35322	1.87281		1.84614
		0.90964	1.98826	3.65827		0.629592
		1.9127	2.12554	1.20703		1.0151
		1.25679	2.68313	2.64442		1.1347
		1.52259	1.7718	1.70437		1.25424
		1.9983	1.6607	1.67865		1.29017
		1.50836	1.72786	1.87506		1.15837
		2.05046	0.947731	1.31046		1.64004
		0.85087	1.21428	1.35597		1.20373
		1.15928	0.642865	1.23235		1.03916
		2.53871	2.00106	1.11382		0.653938
		1.86244	1.47768	2.11709		1.33219
		1.70656	2.0006	2.79539		1.42246
		2.07789	3.16156	1.26288		0.975296
		1.3223	1.30548	1.11938		1.1228
		0.595236	1.49291	1.15675		0.543323
		1.04647	1.65834	2.10821		1.46568
		2.61291	2.87401	1.22416		0.451534
		1.56784	1.17772	1.31462		0.767946
		1.01936	2.19172	2.13866		1.37344
		1.00276	1.30654	2.07871		1.8018
		2.23387	1.06693	1.41471		1.77276
		1.4839	1.09905	1.93614		1.13484
		1.28968	1.34928	2.45781		1.25979
		0.665017	0.821148	2.96233		1.52672
		1.89963	0.359056	2.03845		1.14958
		0.730246	0.639778	1.77763		0.769573
		0.529313	0.359056	2.48465		0.946751
		1.58192	0.769573	1.38818		0.906413
		1.07138	1.3645	1.83005		0.798746
		1.74108	1.42785	1.99357		0.77651
		0.980957	2.00069	1.30225		1.41076
		1.55479	1.72536	2.21916		0.797168
		1.04459	1.38705	1.03941		1.32915
		1.98634	0.762453	1.8503		1.01283
		1.0027	2.84377	1.54338		1.57216
		2.903	2.83904	1.45353		1.11162
		0.957233	3.2772	1.85823		0.562296
		1.20966	1.01842	2.64929		1.05874
		1.01347	0.884459	1.30552		0.955671
		1.93354	2.3341	1.4724		1.25365
		2.16797	2.20034	0.501938		0.743133
		0.649907	2.12923	2.19095		1.0151
		1.13467	1.64825	1.60474		0.994554
		2.08915	1.02878	1.07145		1.27722
		2.35964	2.40155	1.61078		1.50358
		1.53937	1.64963	2.08108		0.94484
		0.922915	0.937395	2.35594		0.85152
		1.25768	1.98982	1.55565		1.36605
		1.34224	1.29776	1.67444		0.703601
		1.21072	1.82706	2.55629		0.616299
		0.844019	1.34956	1.03863		1.17201
		1.60502	2.37385	1.18564		1.11262
		1.7742	1.92817	2.51314		1.25651
		0.974955	2.57346	1.58773		1.96506
		0.359056	1.70733	1.28255		1.60025
		1.00274	1.17191	1.85765		1.3931
		1.41375	0.661645	1.43642		2.11033
		0.411032	1.89891	1.75836		1.19004
		1.44904	3.19977	2.37447		1.94973
		0.914178	1.08206	1.08183		1.22349
		1.41581	1.38252	0.517811		1.16
		1.54061	1.15083	1.72474		1.65023
		1.13555	1.95847	2.30748		1.43023
		1.21907	1.39306	1.27005		0.74828
		0.826593	1.41116	1.85504		1.18846
		1.27962	0.747667	1.92878		0.794133
		2.10712	0.875665	1.64208		0.497318
		1.91765	1.77761	2.08814		0.968517
		1.56183	2.00878	1.16059		0.958613
		1.1525	1.51397	1.83492		0.639778
		1.16404	2.93	1.62132		0.892172
		1.63896	1.68791	2.25193		1.21263
		1.47561	1.4916	3.63846		1.15485
		1.82153	0.798794	2.22171		1.05257
		0.733194	1.74335	1.50637		1.26903
		1.39226	1.30642	2.0325		1.31531
		1.08394	2.40271	1.99733		1.3066
		1.28751	2.54597	1.20625		0.713556
		1.47351	1.40479	2.56041		1.51042
		1.67271	1.97239	1.33882		1.61809
		1.40399	1.64869	1.08238		0.718644
		1.45855	1.86743	2.54886		2.92327
		1.04338	2.02398	0.359056		1.14887
		1.26197	2.65316	1.77559		0.92324
		0.78611	1.83399	1.01847		0.822232
		1.28928	1.62735	2.20039		0.865172
		1.1148	1.92904	1.5219		0.808283
		1.70896	2.18577	1.04397		1.06396
		1.02424	1.52525	2.16768		1.36165
		1.11323	1.34465	3.06302		1.58337
		1.6022	1.46849	1.69481		3.58384
		1.40308	2.28228	2.8064		0.899416
		1.29682	2.38321	1.64689		1.37705
		1.19502	0.685789	1.10981		1.43535
		1.24577	1.19696	1.73778		1.38636
		0.894948	1.99331	2.40735		2.5121
		1.88794	2.15632	0.659223		1.13109
		1.61215	1.61326	1.91099		0.987549
		1.00749	1.53027	0.816632		0.490064
		1.14892	1.96004	1.06379		1.17133
		1.18735	1.89373	2.44112		1.35086
		1.81295	2.46778	1.34856		1.06167
		0.91207	1.37672	2.25166		1.33885
		1.45123	2.56153	1.64468		0.791498
		0.845706	2.01431	1.62084		1.08689
		1.08245	1.38139	1.23234		0.903467
		0.715462	1.64946	1.75005		1.56865
		1.24777	1.68713	1.48328		0.871883
		1.1045	0.968883	2.52754		0.850926
		1.21833	2.46954	1.65807		1.19004
		1.43547	2.76008	1.24827		1.05477
		1.51491	1.85966	1.95427		1.03183
		1.60839	1.56593	0.839928		1.72743
		1.45127	1.95942	1.00269		0.628863
		2.69245	2.04764	2.47085		0.405512
		1.39232	1.19817	1.88777		1.64576
		1.12579	2.77291	1.89185		0.689388
		1.46485	1.17472	1.7392		0.895866
		1.34346	1.92407	1.9999		1.23631
		1.34578	1.58386	1.39119		0.668407
		1.18528	1.11338	1.63781		1.0521
		1.80822	1.46446	2.29922		2.04239
		1.60267	1.55669	1.62103		0.823793
		1.19994	1.14759	1.15431		2.36771
		1.21001	1.55609	1.59396		0.405512
		1.33143	1.2974	1.41404		0.98691
		1.27712	1.19452	1.42708		0.501938
		1.73373	1.81132	1.74004		1.44059
		1.42405	1.16668	1.55447		0.763135
		0.666099	0.90459	2.12882		1.89594
		1.4834	1.27041	1.11604		0.677993
		1.59566	2.17749	1.70724		0.660934
		1.58601	1.37673	2.09047		0.798746
		1.76569	2.32702	2.66805		0.581176
		1.36358	1.56233	4.07204		1.75298
		1.02761	0.751132	1.70724		0.773079
		0.6351	1.43488	1.81593		1.36725
		1.29653	0.786053	1.56584		1.06067
		1.66656	1.18128	1.97782		1.17497
		0.895853	0.991152	1.75573		1.18276
		1.02408	2.30468	3.17424		0.754769
		1.01061	0.792048	1.97488		0.848116
		1.07221	2.4276	1.5067		0.843872
		1.98046	1.20891	1.16002		0.782591
		0.910079	1.67128	2.78373		1.13115
		1.1024	2.07642	2.75872		1.9858
		1.0874	2.2759	1.37583		1.46581
		1.85042	2.46035	1.79512		0.677627
		0.955149	2.11861	1.41901		1.46923
		1.31844	1.47122	2.01222		1.43643
		1.42147	1.64937	2.34363		0.891607
		1.62797	4.05706	1.6561		1.51556
		1.16943	1.61425	2.14269		0.633232
		1.07283	1.68823	2.1425		0.514169
		2.7248	0.901088	1.3324		0.886825
		0.869663	1.17088	2.32595		0.556432
		1.09519	2.08547	1.43237		2.58533
		1.82766	1.54353	1.68226		1.2626
		1.7454	1.18092	1.26554		1.4303
		2.13366	2.00945	1.67552		1.51133
		1.23316	1.41725	1.49309		1.59395
		1.32882	1.75288	1.26235		1.63879
		1.41534	1.45534	1.7058		1.53393
		1.09376	2.11735	1.52879		0.645614
		1.33214	1.75146	1.43864		1.31458
		1.58955	1.42392	1.5563		1.20009
		2.14182	2.30456	1.13757		1.27824
		1.70302	0.891266	2.93168		0.943377
		2.62774	2.16417	2.509		1.28592
		1.7764	1.94023	1.34003		0.852266
		1.88175	1.34308	2.2118		0.654277
		1.35037	2.23752	0.943654		0.805189
		1.26568	1.53754	1.80366		1.57759
		1.37138	1.15687	1.66093		1.00127
		0.901825	1.51964	1.68181		0.883291
		1.0582	1.73	2.5913		1.02302
		1.42201	1.13363	1.59564		1.18676
		1.57388	1.58518	1.86441		1.2344
		1.31453	2.02831	1.13586		0.451534
		1.34596	1.43242	1.78888		0.964747
		0.865214	1.58632	1.31447		1.23315
		1.27691	1.09804	0.63366		0.82226
		1.4628	3.82669	0.871393		1.27501
		1.3526	0.405512	1.68739		0.855946
		1.82272	1.87462	1.25922		0.501938
		1.23601	1.34814	3.07203		0.723783
		0.946221	1.65482	0.870894		0.501938
		1.38281	0.74128	0.501938		1.51396
		0.988369	1.08907	2.38431		0.993036
		1.527	2.59388	1.48892		1.43215
		1.33939	1.93944	1.22514		0.914271
		1.87266	1.5988	1.9863		0.556602
		1.45901	1.60516	0.680204		1.71277
		1.9869	2.89415	1.3619		1.20596
		1.85558	1.06347	1.17074		0.814311
		1.40043	2.04517	2.06056		1.48272
		1.30912	1.90166	2.34088		0.458476
		1.64245	1.74479	1.17104		2.18988
		0.94734	1.74274	1.07754		1.37901
		1.58565	2.37873	1.23691		2.29943
		0.707614	1.36035	1.65917		0.995081
		0.977967	1.62798	2.42858		0.663824
		1.37029	2.42041	1.29001		1.04373
		0.943833	2.38546	1.90025		0.955918
		1.45053	1.39734	2.02794		0.828816
		0.93374	2.36009	1.34597		0.866867
		1.03611	2.54482	1.71092		1.26969
		0.971679	1.02142	2.09289		0.943706
		0.733266	1.95083	3.03765		0.977579
		1.96079	1.65004	1.69404		1.14362
		0.901891	0.405512	0.75926		1.17549
		1.26728	1.1853	1.83878		1.7802
		2.12763	1.34989	1.87523		1.05396
		1.08415	1.78684	2.50168		1.18296
		0.818491	3.21187	2.99899		1.36847
		1.10663	1.94807	2.09842		0.723491
		1.68668	1.56831	3.39477		0.670394
		0.944406	0.81946	1.86435		1.77678
		1.21876	1.44724	2.34775		1.41985
		1.30231	2.04513	0.937108		1.15376
		1.73681	2.25559	1.40353		1.03416
		1.12654	1.55894	1.50707		0.992937
		1.02814	1.45285	1.85438		0.920106
		0.621972	2.61906	1.85875		0.965425
		3.15773	1.54956	1.41826		0.579184
		1.25399	1.71428	2.16569		2.07515
		0.640935	1.92321	2.34094		0.693942
		1.30036	1.87379	1.73114		0.642759
		1.61631	2.19612	1.16937		1.23774
		1.45855	1.77771	2.32624		1.4841
		1.31342	0.677366	1.28637		1.43798
		1.35022	1.45332	1.36021		0.991232
		0.443609	2.40354	0.559225		1.67999
		0.921479	1.32916	2.2113		0.640273
		0.530986	2.5143	1.49496		0.405512
		0.796336	2.36871	2.26479		1.26973
		1.07086	1.00292	1.20321		0.819802
		0.753597	2.40825	1.87255		2.17829
		1.28927	2.12701	1.72369		0.476971
		1.15719	2.33961	1.66268		1.07511
		0.676365	0.582274	2.84128		1.75137
		0.773079	1.71387	2.74646		1.60059
		1.83673	1.43479	1.83338		1.95101
		0.967477	2.47188	2.48437		0.671992
		0.927098	1.7738	0.747564		0.65918
		1.02175	1.58576	1.40158		0.675948
		2.45388	1.44566	1.53985		1.10368
		1.332	1.2411	1.72169		1.16364
		1.37198	0.695396	2.22462		1.29009
		0.938849	1.60296	2.39071		0.568396
		1.29267	2.02666	1.45851		1.83317
		1.46274	0.857698	2.00125		1.14868
		1.67911	2.43243	1.74133		0.820803
		1.22221	2.89134	1.71254		1.35781
		0.87081	0.776856	1.14536		1.28289
		1.06167	1.86322	2.20961		1.10296
		0.973599	0.735317	2.79265		1.23674
		0.896647	1.92894	1.82639		1.35242
		1.29561	1.74838	3.17902		1.14693
		2.1129	2.59529	1.15813		1.27502
		1.11052	3.21679	1.14433		1.62205
		2.16276	2.05858	2.47889		0.937359
		1.01514	1.59068	2.14452		0.857113
		1.26131	1.92356	3.16849		0.502535
		1.59166	1.87735	1.31251		0.960613
		1.61055	2.31927	1.09989		0.686437
		2.5855	1.61421	1.71001		1.22329
		1.38081	2.70742	2.37682		0.852707
		1.10026	3.26408	1.26362		1.03674
		1.87995	0.706701	2.03394		0.713556
		0.359056	2.21498	2.26078		0.832462
		1.43989	2.47615	1.06509		0.679749
		1.24599	1.60647	1.07675		0.753001
		0.914594	1.50584	2.38343		1.13156
		1.04828	2.74969	1.42537		1.58791
		1.95744	1.38902	0.706972		1.39341
		1.68108	0.610138	1.36103		1.32151
		1.20295	1.29247	0.952662		1.28911
		1.31517	0.443609	1.13949		1.41189
		1.24425	1.97407	0.992862		1.48409
		1.32163	0.61	3.38642		1.34887
		1.37742	2.90429	2.40755		1.24108
		1.06716	1.79726	1.6101		0.778576
		2.56942	2.26786	2.51005		1.31129
		1.78035	0.570694	1.65901		0.927413
		1.87122	0.718526	1.27444		1.27355
		1.67294	1.47351	1.37676		1.11027
		1.05708	2.20986	1.71862		1.59949
		2.0435	1.51651	1.58162		1.51116
		1.43898	1.29554	1.28664		1.82263
		1.73307	2.26904	1.95957		0.546542
		1.7321	0.443609	2.49986		0.984633
		1.32372	0.530986	2.38783		1.68519
		1.2535	1.47318	1.21194		1.85553
		1.49811	2.14899	1.9164		1.87842
		1.08461	1.82754	1.98011		0.644285
		1.78988	1.70962	1.48999		0.701114
		1.07367	2.35257	2.51583		1.07547
		1.89852	2.83125	0.888272		0.919777
		1.09441	1.86919	1.30084		1.06199
		0.967664	1.03924	2.6973		1.05178
		1.72608	0.405512	0.896251		0.69698
		1.36095	1.70862	1.77728		0.882563
		1.27438	1.50542	1.48804		1.03388
		1.29125	1.16166	2.74773		1.4308
		1.4128	1.67219	2.49979		1.36423
		1.29227	1.52143	1.76209		0.84039
		1.09448	2.37793	1.53105		1.2121
		1.84236	3.81091	1.12844		1.14452
		1.15721	0.607991	1.92481		0.82226
		1.77956	1.57604	2.34783		0.82094
		0.680204	1.26693	1.6509		0.405512
		1.47448	1.32709	1.97164		1.06375
		1.04679	1.50161	0.669094		0.876272
		1.82029	1.41462	1.63872		1.33651
		1.27086	0.947714	1.31832		1.84582
		1.72949	2.1955	1.70745		1.16866
		1.47902	1.22953	0.965755		0.359056
		2.31602	3.11989	1.52096		1.17202
		2.4807	2.00017	1.39018		1.88737
		1.29157	1.08828	1.45772		0.727696
		2.39061	1.65168	3.60141		1.29916
		0.610738	2.16785	1.13013		1.7746
		1.32113	1.40619	0.820584		2.5189
		1.12003	1.17966	2.24605		1.44941
		1.47392	0.411032	1.33466		0.84812
		1.25228	0.733039	1.8181		0.663584
		1.91758	0.359056	1.82459		1.05698
		0.536712	1.82439	1.26334		1.91299
		0.998833	1.22487	2.07432		1.95054
		0.4701	1.43259	1.12123		1.27557
		1.65353	1.18007	1.69961		0.701114
		0.698307	0.662007	1.15855		1.51766
		1.08523	2.10861	1.10759		1.47233
		0.918881	2.02281	0.816905		1.69002
		1.20065	0.359056	2.13251		2.07152
		1.46747	1.29743	1.71976		1.29271
		0.835027	1.32912	1.48878		1.16256
		1.78167	2.5561	1.51064		0.881243
		1.00745	1.7498	1.05699		1.24168
		1.88051	2.94923	0.901951		1.37539
		1.25104	0.752604	1.198		2.07851
		1.78828	1.60289	0.79519		1.84463
		1.94528	1.36241	1.57551		1.53502
		0.765871	1.60585	2.27993		1.14574
		1.55748	1.58884	1.96734		1.44365
		1.21358	1.76719	2.06756		2.83338
		0.722924	2.6654	1.33183		2.16337
		1.48274	2.98978	2.05073		1.36305
		3.25483	1.50746	1.08763		0.921478
		1.33204	1.90124	2.40082		1.52236
		1.46627	0.697894	1.28356		2.05527
		2.25716	1.18835	1.90876		1.22766
		1.47345	1.00764	1.68474		1.4411
		3.11542	1.98079	1.36257		0.860484
		0.763135	2.77762	1.12588		1.2465
		1.59823	2.06627	1.0241		1.13183
		1.74409	2.10757	2.76196		1.51047
		1.42976	1.16888	0.991797		0.850374
		1.58838	1.85243	1.76135		1.67733
		1.44428	2.34395	1.49038		0.662007
		0.942083	1.78475	1.89113		0.994037
		1.40578	1.37552	1.73569		0.411032
		1.73368	1.68652	1.70617		0.798746
		2.00208	1.37726	2.0646		1.42658
		1.02844	2.19932	2.93709		0.892269
		1.5748	2.33829	1.22096		1.59751
		1.35651	1.61529	1.98416		1.02942
		1.50133	1.93291	2.06912		1.27787
		1.63756	1.588	1.37786		2.02845
		1.53258	1.53306	2.84723		0.912954
		2.49724	1.74035	2.08757		1.79828
		1.35484	1.24136	1.37896		0.75075
		0.78176	1.78519	2.16166		1.29267
		1.50279	2.4754	1.56499		0.691843
		1.19596	2.19115	2.54381		1.00441
		1.56626	1.21028	1.22674		1.32548
		1.00132	1.3728	1.74398		1.44208
		2.13339	1.9765	2.09679		1.67894
		1.27072	1.28536	2.28064		1.02529
		1.60481	1.85069	1.57142		1.37048
		1.15309	1.63326	2.26862		1.29754
		1.9624	1.99398	1.34565		1.40961
		1.13746	1.94088	1.66722		1.15859
		0.702546	1.54598	1.12959		1.23644
		1.58071	1.68967	1.61773		1.28093
		1.0008	2.05705	1.63871		1.27863
		1.81976	1.49832	3.28569		0.91454
		1.52155	2.39848	1.62896		0.828572
		1.44164	1.38124	2.12371		0.877108
		1.08468	1.58725	0.729623		1.75874
		0.98221	1.67257	1.51211		1.32364
		1.74805	2.32322	2.55307		1.08885
		1.37251	1.34044	1.18882		0.997658
		0.836647	1.4538	0.48256		0.790491
		1.40522	0.992485	1.87272		1.33872
		0.829508	0.451534	1.70127		1.28838
		1.57174	0.842083	2.62946		1.12353
		0.924414	2.78794	1.90825		1.00518
		1.82651	1.93994	1.45469		1.28188
		1.15896	1.53327	1.98634		0.710039
		1.6519	1.73134	1.12159		1.23286
		1.15236	1.562	1.49839		1.68176
		0.649907	2.28584	1.87203		0.800721
		1.32438	1.6276	1.82878		1.21836
		1.11554	1.72877	2.1366		0.661344
		1.25473	1.34929	1.24487		0.967241
		2.794	1.391	1.72808		0.859676
		1.36355	1.573	1.64365		0.853145
		1.06065	1.90114	1.83836		1.14971
		1.52358	0.443609	1.91492		1.66319
		1.82428	0.850338	1.82231		0.921205
		1.60245	1.25025	1.75309		1.57008
		0.932964	0.446615	0.875183		1.63132
		0.796421	1.39464	1.73461		1.8413
		2.2849	0.763135	2.15744		1.89993
		2.16368	2.03608	1.74282		1.48447
		1.0126	1.53307	2.01436		1.12708
		1.7904	1.48841	1.66088		1.22228
		1.26433	2.60416	1.69343		1.01311
		1.69132	2.32129	1.61755		1.3632
		1.44118	0.765092	1.63834		1.31049
		1.23914	1.59479	1.03819		2.2889
		0.986162	2.14698	2.0812		1.45363
		1.30722	2.16975	1.95785		0.782525
		1.37865	1.63673	1.76426		0.648838
		2.05226	1.00659	1.57867		1.30839
		2.14471	1.45793	1.53222		1.8563
		1.82416	0.604598	2.06211		1.867
		1.72782	0.987267	0.934214		1.52041
		1.0728	0.987267	1.19427		1.1683
		1.19469	1.67023	1.56515		1.26745
		0.960613	1.94528	1.6536		1.73627
		1.84606	1.7929	0.895392		0.854487
		2.0116	1.97567	2.39244		0.860881
		2.92682	1.76822	1.43762		0.938505
		0.752397	0.882364	1.62294		1.24239
		1.69088	1.40958	1.13472		0.943519
		1.73256	2.55136	1.53201		0.889456
		1.18381	1.66753	1.25779		0.671545
		1.57701	1.70974	3.04183		1.25263
		1.72983	1.78293	2.596		1.29574
		0.948109	1.97211	2.0283		1.45225
		1.84127	0.583427	2.40608		0.986971
		1.69631	1.40474	1.32676		0.633399
		0.992614	0.787981	1.8041		1.8857
		1.60774	1.0206	1.92828		1.91667
		1.36042	2.59611	1.23682		0.775453
		1.43388	1.89418	2.80538		1.10245
		0.899913	1.15091	2.5477		0.783046
		1.6954	1.44535	1.81199		1.81051
		1.26175	1.47444	2.25938		0.620527
		0.888158	0.359056	2.05014		0.878393
		1.39983	2.30771	2.04183		0.763135
		1.14114	1.09796	1.19263		0.930999
		1.04794	1.36797	2.80012		1.65339
		0.988144	0.962943	2.28374		0.882829
		1.61874	2.03575	0.838423		1.71352
		1.25618	2.25203	1.80064		0.919138
		1.88286	3.02225	1.45556		0.946153
		1.45866	1.93764	1.6003		1.22991
		1.29569	1.96375	1.45579		0.782475
		0.942094	1.87742	2.18886		0.639096
		1.06192	2.46071	1.6845		0.913568
		0.85393	0.634245	1.62723		1.51242
		3.16127	2.38986	1.51713		0.405512
		1.47397	1.71637	1.38532		1.27109
		1.23834	2.37988	1.06885		2.24037
		0.972367	2.07336	0.506337		1.52654
		1.58095	1.21829	2.09954		1.17826
		0.889003	1.00059	1.72094		0.948887
		1.40234	1.23739	2.18818		0.976208
		1.47981	2.23859	1.68189		1.01844
		1.38729	1.66539	2.02824		1.10983
		0.514169	2.40903	2.24132		1.72593
		1.7279	1.56949	1.58032		1.8519
		1.18881	1.87032	1.65545		1.58357
		1.06698	2.04877	1.59889		1.35896
		1.11035	1.88366	1.55777		1.16041
		1.12658	1.93748	1.70566		1.5377
		1.55073	1.63283	1.70772		0.983606
		1.83425	0.359056	1.15453		0.904604
		1.47182	1.74504	1.9688		1.71359
		1.73391	0.877108	1.46409		0.856568
		1.75141	0.952858	0.9597		1.21248
		2.45507	2.41968	1.64098		1.18173
		1.10173	2.57064	1.08281		1.07546
		1.10037	1.82099	0.797772		1.31308
		1.31197	1.42918	2.15978		0.761221
		1.40088	1.41984	1.62029		0.642759
		1.39282	1.11801	1.16346		0.869503
		1.28512	2.61235	1.76257		0.850333
		1.12075	1.1354	1.51169		0.861873
		1.70184	0.679566	2.54338		0.913865
		0.923958	2.09843	1.35546		1.2233
		1.40668	1.62071	1.10177		1.69887
		1.18104	1.33349	1.50286		0.713556
		0.975029	1.84896	1.65062		1.13615
		1.56477	2.04975	2.13929		1.57306
		1.39735	2.39313	3.09557		1.36004
		2.16241	1.67278	1.06288		1.03293
		2.1028	2.31595	2.35343		0.604408
		0.871045	1.28619	1.39149		1.47274
		1.98474	1.60227	1.08254		2.80735
		2.02913	2.78606	0.835824		0.871543
		0.970031	1.34963	1.35515		1.4687
		1.53624	1.77875	1.16707		1.30158
		1.38531	2.09978	1.50339		1.45473
		2.01061	1.91533	2.07271		1.28655
		1.26185	2.08657	2.61512		0.777545
		1.64377	1.63472	1.89283		1.62198
		1.07301	1.42489	1.31869		0.825707
		1.59343	2.77991	3.49478		1.67444
		0.896473	2.14624	1.98123		1.63391
		1.37308	1.03924	1.29144		1.12043
		1.26276	2.23864	2.58417		1.09549
		1.66314	3.24618	1.76845		1.28072
		0.942068	1.44256	2.58586		1.02245
		1.63136	1.78104	2.23795		1.03221
		1.48394	1.77555	0.912384		1.05385
		1.15526	1.47507	4.0255		1.2283
		1.6245	2.5228	1.21405		2.48514
		1.33061	2.01365	2.2187		0.923239
		1.98022	1.6408	1.99319		0.806646
		1.07114	1.75643	1.29834		0.770952
		0.922777	2.24481	2.23165		1.04113
		1.25633	2.95609	1.12411		2.01628
		0.831745	1.65279	1.52278		1.66493
		1.34335	2.17247	2.58318		0.914363
		1.47833	2.441	1.38545		0.870979
		1.32953	1.23907	2.05392		3.16035
		1.24859	1.82323	1.39147		1.3152
		1.09508	1.47567	2.73794		1.62095
		0.607991	2.78911	1.85479		1.13755
		0.870133	1.02804	1.43437		0.618375
		1.05527	2.62473	1.96941		0.632031
		2.55732	1.46772	1.14871		1.03044
		1.71106	1.47937	2.21174		1.03633
		1.1861	1.87688	1.27601		0.753461
		1.14854	2.07294	1.51346		0.890919
		0.913804	0.501331	1.44961		1.04993
		1.01248	1.73038	1.09417		0.559608
		1.7181	1.81182	1.64827		0.666887
		1.08272	1.80254	1.55629		1.75182
		1.50351	0.758644	1.34633		1.17332
		1.28654	1.64066	1.42345		1.10302
		1.57432	3.06151	3.26835		1.00066
		1.51415	1.39445	1.47778		0.785894
		1.01075	1.5451	2.03844		1.04917
		1.4108	1.59721	2.12947		1.86497
		1.82025	0.411032	1.12964		0.725576
		0.745728	2.29682	2.02738		1.38975
		0.711647	2.35234	0.901107		0.802414
		1.61003	1.60474	2.72213		1.62234
		1.71865	1.44359	2.12778		0.57506
		1.09696	2.3827	1.12564		0.884118
		0.98858	0.463193	0.76226		1.57959
		0.965775	2.32869	2.00267		1.47695
		1.6142	1.69063	1.3211		0.73794
		1.44946	2.54773	1.74948		0.877266
		0.822745	2.86949	1.88744		0.701141
		0.595236	1.60141	0.909829		0.682878
		0.918725	1.72547	1.96177		0.79281
		0.789396	2.7906	1.27043		1.422
		1.12662	2.90041	2.09033		1.40161
		0.924542	1.79327	1.68671		1.18296
		2.26144	1.71584	2.58991		0.885346
		0.556088	1.63637	4.30368		0.929007
		1.54443	1.00496	1.60111		0.642759
		1.0713	2.07891	2.02161		0.975641
		1.39174	2.8205	1.77097		1.27266
		1.12438	2.04976	1.77307		1.33119
		0.958599	2.83101	2.07428		1.05781
		2.07922	2.00813	1.05777		1.7167
		1.47737	2.24104	1.6946		1.02331
		0.975738	1.17456	2.49323		0.681059
		2.48563	1.10181	2.32649		0.627496
		1.92611	1.30218	2.77554		1.58204
		1.64105	1.58025	2.53526		1.46248
		1.68812	2.72773	2.09396		0.910602
		1.96055	1.81983	1.49802		1.8348
		1.17454	3.11657	1.45268		0.949842
		1.07885	1.76901	2.26085		1.21333
		1.52427	1.71459	1.15255		1.22027
		0.766979	1.43088	0.761917		1.0524
		1.33718	1.29444	1.21523		1.64233
		1.34773	1.59068	2.25355		1.33578
		1.71936	2.23273	2.60042		1.41925
		2.10501	2.70222	2.18764		0.90132
		1.54927	3.1465	1.80459		0.920849
		1.48288	2.07699	1.66483		1.50195
		1.66654	1.54792	1.47427		1.31034
		0.947769	0.820712	1.89692		1.32906
		1.56805	1.18019	1.37013		0.989071
		2.16572	1.75861	1.28824		0.981002
		1.10558	2.09199	1.28931		0.793491
		1.369	1.39484	2.16734		0.654231
		1.4737	2.21071	1.19208		0.693604
		1.30775	1.33156	2.54457		1.12564
		0.728652	1.74469	3.19661		0.642759
		1.67739	1.8139	1.88955		1.20453
		1.14974	1.16114	1.97985		1.86033
		1.15243	1.7333	1.65019		0.850787
		1.6065	0.590301	1.30597		0.867275
		1.34566	1.76194	1.42987		1.39858
		2.00278	2.22118	1.46488		0.562535
		2.01016	1.04862	1.67429		1.76874
		1.30403	1.87252	1.52737		0.542986
		1.73179	1.44014	1.59722		1.52207
		1.55081	0.797772	0.965067		1.69328
		1.33191	2.23439	0.920837		0.837304
		1.77912	1.41106	0.642759		1.23507
		1.44424	2.2859	0.987202		0.790491
		1.11889	1.76237	0.743133		0.980792
		1.56774	2.32542	0.61489		1.05964
		2.37132	1.4373	1.41914		1.85678
		0.965471	1.22628	1.63311		0.704347
		1.55734	2.54941	0.953305		1.07495
[truncated: 3,891 more rows]

## Sheet: Fig. 4F
30 minute cell cycle data as a percentage of the total population
		Phase 1	Phase 2	Phase 3
	PA + VAN(20)	51.5687	25.4416	22.9897
	PA + VAN(10)	42.6209	24.0458	33.3333
	PA(11)	50.9652	34.2857	14.749
	VAN(20)	57.2423	35.6257	7.13194
	Control	59.2332	32.1205	8.64632
