# Supplementary material for: Antibiotic-induced accumulation of lipid II synergizes with antimicrobial fatty acids to eradicate bacterial populations
Source: eLife. 2023 Mar 6;12:e80246. doi: 10.7554/eLife.80246 (PMC10030119; doi:10.7554/eLife.80246)
Supplement: Figure 5—source data 1. [file elife-80246-fig5-data1.xlsx]

## Sheet: Fig. 5A
ATP 10 min
	Control	VAN(10)	PA	PA + VAN(1)	PA + VAN(5)	Nisin
	2.03e-05	2.51e-05	8.37e-05	0.000134	0.000128	0.000113
	1.95e-05	3.01e-05	8.43e-05	0.000129	0.000137	0.000115
	1.92e-05	2.99e-05	8.8e-05	0.000127	0.000137	0.000121
	8.14e-06	1.47e-05	6.93e-05	0.000106	0.000121	0.000133
	7.85e-06	1.42e-05	6.79e-05	0.000102	0.000113	0.000133
	7.79e-06	1.45e-05	6.83e-05	0.000103	0.000112	0.000139

## Sheet: Fig. 5B
sytox green
	Time (min)	Control									VAN 10									PA11									PA+VAN1									PA+VAN5									PA+VAN10
	0	46257	44970	44867	43102	43026	42560	35946	36279	35484	44766	44976	44561	42807	42672	42446	36134	35770	35907	44667	44968	44773	42711	42709	42595	36764	36129	36383	44488	44460	44734	42539	42259	42787	36764	36536	36826	45373	45387	45384	43472	43649	43031	36789	36385	36692	45257	45866	44870
	2	44411	43768	43510	41511	42124	41593	34912	34330	34343	43592	43604	43527	41752	41976	41285	35206	34701	34795	45156	44511	44210	42365	42499	42892	36187	35882	36305	43748	43802	44269	42177	42185	42091	36457	36585	36304	45468	45256	45545	43560	44518	43982	37284	36945	37417	45645	46536	45978
	4	42744	42966	42276	39959	40434	40165	33195	33559	33465	42766	43114	42209	40630	40991	40631	33946	33736	33837	45171	44991	44072	43813	42748	43728	36309	35977	36642	43535	43432	43802	41585	42433	41469	36715	36487	36804	46340	46246	46427	44362	45825	45318	38448	38040	38226	46418	47008	46531
	6	42766	41804	42362	39454	39518	39347	32759	32720	33252	42834	42597	42204	40356	40869	39883	33457	33269	33414	45287	46107	43893	42800	42938	43473	36668	36236	37109	43804	43883	44063	41952	42086	41816	37133	37104	37131	48140	47347	50046	45948	48316	47794	40586	39410	39788	47099	48987	47293
	8	43034	42562	43040	39176	39111	38350	33237	32900	33064	43537	43140	43978	39668	40286	41421	34151	33105	32890	47404	45260	44612	43097	43873	43022	37727	36627	37592	43844	46072	43708	42056	41820	42245	38207	37981	38101	50331	48864	50417	47931	50812	50028	43312	41187	41427	48202	50949	49928
Fig. 5C	10	43549	42363	42914	38287	40265	38328	34763	33497	32861	45412	44586	45442	40063	42237	41926	35548	33851	33252	45501	45307	44808	43687	44512	43720	38813	37461	38500	44115	45822	44091	42603	42288	42473	39054	39069	39039	52398	51135	52823	50676	52544	53145	46038	43684	44110	49672	54827	51713
	12	44739	42599	43407	38419	40343	38175	34691	34007	33050	46503	45484	47065	41254	43626	43018	36704	35328	33268	45104	45788	45104	44248	44905	44459	39548	37897	39599	44567	46345	44031	42852	42406	42738	40040	39784	39671	54354	53260	54605	53394	55944	52794	51386	47333	50307	51288	55996	52415
	14	44782	42471	43047	38860	40063	38353	34599	34183	32970	48688	47551	45763	43020	45920	43612	37700	36488	34161	45047	46097	45449	44428	45444	44711	40590	39522	40031	44516	47297	44763	43892	42803	43761	40726	40932	41004	57079	54795	55775	57523	60737	56033	61365	53382	54644	52823	58809	55928
	16	44609	41936	42855	39140	39165	38640	34772	34332	32817	51838	50311	47603	45738	48501	47357	39387	39032	35468	45459	46158	46021	44834	45567	44436	41341	40156	41358	45290	46076	44741	43817	42871	43941	41678	42258	41887	59039	57169	57871	62505	65546	60592	68766	60865	61762	55480	63067	56984
	18	45352	43130	43180	38726	38958	38373	35641	34540	33216	55588	54387	52575	51181	52905	54224	42754	41799	37666	45743	46489	46461	45417	45974	44877	42923	41114	42291	44927	44748	45415	44046	43546	44019	42802	43329	42527	61951	59942	60740	67367	66519	65446	79273	69764	73356	56796	67758	61813
	20	45761	44203	42704	39328	39442	38915	35728	34799	33195	62668	59484	57499	58591	66079	65602	47300	46572	40919	45860	46886	46570	45428	46412	45214	43393	41762	43237	44788	44912	45110	43837	44187	43877	43432	44262	43773	65154	62655	64743	72846	72352	70874	90265	78673	81124	59420	73136	65742
	22	46010	43372	43304	39288	39566	38832	35834	34501	33222	73337	66850	64694	69483	75450	75413	54872	49716	45617	46093	47175	46668	45817	46841	45530	44259	42280	44091	44823	44731	45385	44072	44726	45213	44582	45356	45029	69868	66239	68560	78166	77784	77636	100129	88458	91209	63333	78558	64094
	24	46635	42541	43282	39631	40105	38623	36065	35049	32802	86479	77139	87573	106721	133430	116423	62159	55539	51449	46474	47477	46470	46403	47376	45827	45413	43105	45420	44768	44799	45343	45701	44673	45527	45583	46728	45849	74714	69996	72024	83869	83949	83039	109703	98292	100685	66419	84300	68450
	26	47086	42948	44256	39683	40789	39121	36090	35062	32733	103989	105401	98233	136538	121100	118426	76121	86817	61511	46491	47572	46203	46340	47267	46057	45777	43959	45934	44642	44998	45364	44119	44701	44684	46369	47403	46498	79811	72917	77538	89800	91681	89114	118301	106675	108006	69816	90285	72706
	28	46492	43613	45509	40072	41147	39318	36503	35556	32599	141165	89613	121860	167584	129106	130713	93866	90284	83857	46469	47673	45994	46703	47839	46680	46674	44812	46621	44560	45044	45622	45310	44540	45032	46834	48661	47310	84835	77406	82199	95902	99964	95446	126577	114979	115786	80169	95824	78385
[truncated: 15 more columns]
