# Supplementary material for: Antibiotic-induced accumulation of lipid II synergizes with antimicrobial fatty acids to eradicate bacterial populations
Source: eLife. 2023 Mar 6;12:e80246. doi: 10.7554/eLife.80246 (PMC10030119; doi:10.7554/eLife.80246)
Supplement: Figure 6—figure supplement 1—source data 1. [file elife-80246-fig6-figsupp1-data1.xlsx]

## Sheet: Sheet1
	Time (h)	ORI 10			ORI 10 + PA
	0	7.61278	7.61278	7.6902	7.6902	7.6902	7.69897
	0.5	3.34242	4.5563	4.8451	5.85126	5.44716	5.61278
	2	2.47712	4.69897	4.54407	4.77085	4.62325	4.70757
	6	3.20412	5.30103	4.85126	4.76343	4.14613	5.4624
