# Supplementary material for: Antibiotic-induced accumulation of lipid II synergizes with antimicrobial fatty acids to eradicate bacterial populations
Source: eLife. 2023 Mar 6;12:e80246. doi: 10.7554/eLife.80246 (PMC10030119; doi:10.7554/eLife.80246)
Supplement: Figure 8—source data 1. [file elife-80246-fig8-data1.xlsx]

## Sheet: Conditions
			Concentrations of antimicrobials used for each bacterial species in Figure 7
			Bacteria species	Strain	Vancomycin (μg/ml)	Palmitoleic acid (μg/ml)
			E. faecalis	OG1	50	30
			E. faecalis	V583	50	30
			E. faecium	Clinical isolate	50	11
			S. epidermidis	CSF41498	50	11
			E. coli	MG1655	50	50
			B. subtilis	BS49	20	11
			S. aureus	VISA, VRSA	20	11

## Sheet: Fig. 7a
	Figure 7A
		Time (h)	Control						PA						VAN						PA + VAN
		0	7.69897	7.92428	7.90848	8.23045	8.07918	8.20412	7.73239	7.80618	7.69897	8.07918	8.17609	8	7.78533	7.82608	7.89763	8.07918	8.03743	7.99123	7.716	7.86332	7.8921	7.95424	8	8.04139
		0.5	7.91381	8.27875	8.14613	8.39794	8.27875	8.36173	7.61278	7.75587	7.81954	7.95424	7.95424	8.04139	7.716	8.07918	8.02119	8.34242	8.23045	8.32222	6.4624	6.57978	6.8451	7.07918	6.73239	6.79934
		2	8.25527	8.36173	8.34242	8.39794	8.62325	8.76343	7.73239	8.36173	8.20412	8.30103	8.30103	8.36173	7.73239	7.77085	7.8451	8.25527	8.04139	8.14613	6.30103	6.17609	6.64345	7.07918	6.60206	6.64345
		6	8.49136	8.54407	8.47712	8.64345	8.62325	8.69897	8.49136	8.5682	8.5682	8.57978	8.62325	8.5682	6.23045	7.38021	7.51851	7.63347	7.34242	7.41497	5.14613	4.87506	5.30103	6.07918	5.14613	5.59107
		24	9.32222	9.5682	9.32222	9.32222	9.59107	9.51851	9.14613	9.36173	9.25527	8.95424	9.41497	9.23045	9	8.77815	9.14613	8.61278	8.62325	8.81291	3.11394	2	2	3.14613	2	2.60206

## Sheet: Fig. 7b
Figure 7B
		Time (h)	Control						PA						VAN						PA + VAN
		0	7.59107	7.85126	7.716	7.95904	8.17609	8.38021	7.78533	7.83885	7.69897	7.9345	8.38021	8.34242	7.72428	7.6721	7.716	7.95424	8.11394	8.20412	7.78533	7.6902	7.74819	7.86923	7.716	7.74036
		0.5	8.07918	8.11394	8.07918	8.20412	8.38021	8.5563	7.47712	7.5682	7.43136	7.20412	7.27875	7.68124	7.66276	7.64345	7.77815	8.30103	8.11394	8.44716	5.38021	5.39794	5.44716	5.85126	5.64345	5.6902
		2	8.34242	8.17609	7.95424	8.64345	8.60206	8.6721	7.5682	7.53148	7.34242	7.32222	7.88649	7.64345	7.04139	6.96848	7.07918	8.32222	8.30103	8.44716	4.57978	4.6721	4.50515	5.53148	5.47712	5.36173
		6	8.73239	8.76343	8.80618	8.73239	8.86923	8.91908	8.82607	8.94939	8.77085	8.62325	8.60206	8.69897	7	7.5563	7.36173	8.38021	8.27875	8.32222	3.79934	3.65321	3.77815	4.75587	4.32222	4.61278

## Sheet: Fig. 7c
Figure 7C
	Ctrl	PA	VAN	VAN+PA
	8.79	8.45	8.08	6.38
	8.75	8.3	8.08	5.72
	8.76	8.34	8.2	6.51
	8.8	8.04	8.11	5.84
	8.83	8.18	8.04	5.88
	8.76	8.36	8.32	6.67

## Sheet: Fig. 7d
Figure 7D
		Ctrl	PA	VAN	VAN+PA
		9.04	8.32	8.11	6.18
		8.86	8	8.04	6.2
		8.88	8	8.18	6.6
		9	8.04	7.91	5.58
		9.08	8.08	7.88	5.61
		9	7.9	7.88	5.58

## Sheet: Fig. 7e
Figure 7E
		Ctrl	PA	VAN	VAN+PA
		9	8.36	8.15	4.58
		9.04	8.6	8.18	5.38
		9.2	8.3	8.04	4.64
		9.04	8.23	8.08	6.61
		9.08	8.15	7.84	5.95
		8.94	7.04	8.11	6.76

## Sheet: Fig. 7f
Figure 7F
	Ctrl	PA	VAN	VAN+PA
	9.04	6.9	6.72	2
	8.74	6.48	6.2	2
	9.08	7.18	6.6	2.3

## Sheet: Fig. 7g
Figure 7G
	Ctrl	PA	VAN	VAN+PA
	9.2	9.15	8.43	5.15
	9.18	8.95	8.05	5.6
	9.2	8.98	7.86	6.3

## Sheet: Fig. 7h
Figure 7H
	Ctrl	PA	VAN	VAN+PA
	9.34	9.23	8.53	8.64
	9.26	9.11	8.53	8.69
	9.11	8.82	8.53	8.66
